# Supplementary material
Source: PubMed Central journal article supplement (PMC8717859)
Supplement: NIHMS1764158-supplement-Supporting_Information.pdf [file NIHMS1764158-supplement-Supporting_Information.pdf]

# Supporting Information

## Cooperative Hydrogen-Bond-Donor Catalysis with Hydrogen Chloride Enables Highly Enantioselective Prins Cyclization Reactions

Dennis A. Kutateladze and Eric N. Jacobsen

*Department of Chemistry & Chemical Biology, Harvard University, Cambridge, Massachusetts 02138, United States of America*

[jacobsen@chemistry.harvard.edu](mailto:jacobsen@chemistry.harvard.edu)

### Table of Contents

|                                                                                           |        |
|-------------------------------------------------------------------------------------------|--------|
| 1. General Information.....                                                               | (S1)   |
| 2. Synthesis and Characterization of Catalysts <b>6,7, 9-11</b> , and Intermediates ..... | (S1)   |
| 3. Synthesis and Characterization of Substrates <b>1a-1t</b> , and Intermediates.....     | (S6)   |
| 4. Procedures for Catalytic Enantioselective Prins Cyclization Reactions.....             | (S13)  |
| 4.1 Optimization experiments.....                                                         | (S13)  |
| 4.2 Scope-scale experiments .....                                                         | (S13)  |
| 4.3 Gram-scale synthesis of <b>2b</b> .....                                               | (S14)  |
| 5. Synthesis and Characterization of Products <b>2a-2t</b> .....                          | (S14)  |
| 5.1 Tabulated characterization data.....                                                  | (S14)  |
| 5.2 GC and HPLC traces of enantioenriched products.....                                   | (S21)  |
| 6. Kinetics Experiments.....                                                              | (S48)  |
| 6.1 Rates of Edman degradation .....                                                      | (S48)  |
| 6.2 Rates of Prins cyclization reactions.....                                             | (S52)  |
| 7. X-Ray Crystallographic Information.....                                                | (S63)  |
| 8. Additional Reaction Optimization Data.....                                             | (S67)  |
| 8.1 Pyrrole degradation studies.....                                                      | (S67)  |
| 8.2 Edman degradation studies.....                                                        | (S69)  |
| 8.3 Optimization of HCl slow release methods.....                                         | (S72)  |
| 8.4 Optimization of KHMDS quench.....                                                     | (S73)  |
| 8.5 Optimization of arylpyrrolidine structure.....                                        | (S75)  |
| 8.6 Additional substrates.....                                                            | (S76)  |
| 9. <sup>1</sup> H, <sup>13</sup> C, and <sup>19</sup> F NMR spectra.....                  | (S76)  |
| 10. References.....                                                                       | (S144) |

## 1. General Information

All reactions were performed in flame dried vials or round bottom flasks unless otherwise noted. Vials and flasks were fitted with rubber septa, and reactions were conducted under an atmosphere of nitrogen except where noted. Stainless steel syringes and cannulas were used to transfer air and moisture sensitive liquids. Column chromatography was performed on a Biotage Isolera automated purification system using silica gel 60 (230-400 mesh) from EM Science. Commercial chemical reagents were purchased from Sigma Aldrich, Alfa Aesar, Strem, or TCI, and used as received. Anhydrous solvents (benzene, dichloromethane, diethyl ether, N,N-dimethylformamide, tetrahydrofuran, and toluene) were dried by passage through activated alumina columns using a solvent purification system. Proton nuclear magnetic resonance ( $^1\text{H}$  NMR), fluorine nuclear magnetic resonance ( $^{19}\text{F}$  NMR), and carbon nuclear magnetic resonance ( $^{13}\text{C}$  NMR) spectra were recorded on a Bruker Avance Neo 400 spectrometer. Proton, fluorine, and carbon chemical shifts are reported in parts per million downfield from tetramethylsilane and are referenced to residual proton in the NMR solvent ( $\text{CHCl}_3 = \delta$  7.27), the fluorine resonances of trifluorotoluene ( $\text{F}_3\text{CPh} = \delta$  -63.72) or fluorobenzene ( $\text{FPh} = \delta$  -113.15), or the carbon resonances of the NMR solvent ( $\text{CDCl}_3 = \delta$  77.00) respectively. NMR data are represented as follows: chemical shift, multiplicity (br = broad signal, s = singlet, d = doublet, t = triplet, q = quartet, m = multiplet, td = triplet of doublets, dd = doublet of doublets), coupling constants (J) in Hertz (Hz), integration. Note that some  $^{13}\text{C}$  NMR spectra were obtained without  $^{19}\text{F}$  decoupling.

Optical rotations were measured using a 1.0 mL cell with a 5 cm path length on a Jasco DIP 370 digital polarimeter. Gas chromatography (GC) analysis was performed on an Agilent 7890A series GC system outfitted with commercially available Cyclosil-B (30m) and CP-Chirasil Dex CB (25m) columns. High-performance liquid chromatography (HPLC) analysis was performed using an Agilent 1200 series quaternary HPLC system with commercially available ChiralPak and ChiralCel columns. High-resolution mass spectrometry was measured at the Small Molecule Mass Spectrometry Facility at Harvard University within the Faculty of Arts and Sciences using an Agilent 6210 TOF LC/MS spectrometer or a Waters Quattro micro GC/MS/MS spectrometer. NMR spectra were processed with the MestReNova (Mestrelab Research). Solutions of hydrochloric acid (in  $\text{Et}_2\text{O}$ ) were titrated prior to use. Ethanol used for catalytic reactions was stored over activated molecular sieves.

### Abbreviations used:

Aq. – aqueous, Boc – tert-butylloxycarbonyl, n-BuLi – n-butyllithium, DCM – dichloromethane, DMF – N,N-dimethylformamide, DMP – Dess Martin Periodinane, d.r. – diastereomeric ratio, ee – enantiomeric excess,  $\text{Et}_2\text{O}$  – diethyl ether, EtOAc – ethyl acetate, HBD – hydrogen-bond donor, HCl – hydrochloric acid, HR-MS – high resolution mass spectrometry, IPA – isopropanol, THF – tetrahydrofuran, TLC – thin layer chromatography

## 2. Synthesis and Characterization of Catalysts 6,7, 9-11, and Intermediates

Catalysts 4 and 5 were synthesized according to previously reported procedures.<sup>1,2</sup>

### Synthesis of HBD catalysts—chiral pyrrole synthesis

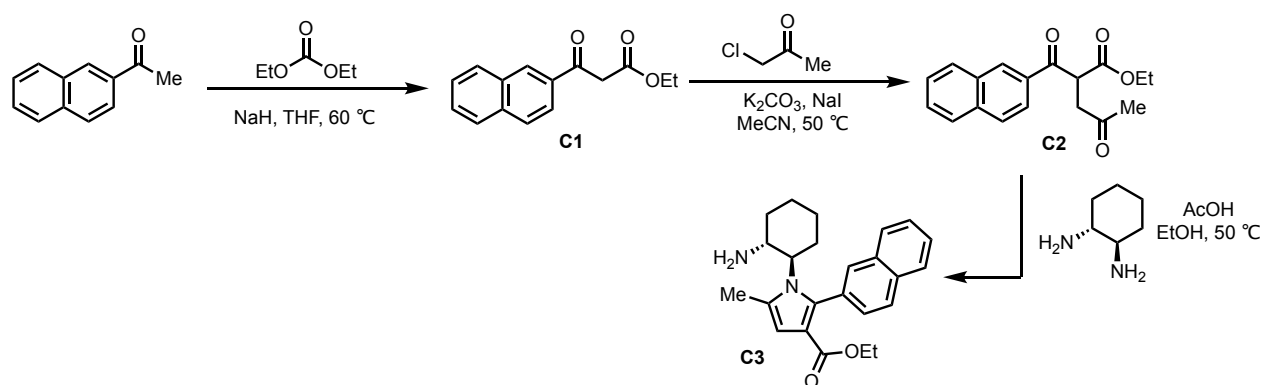

Figure S1. Synthesis of chiral pyrrole moiety

### ethyl 3-(naphthalen-2-yl)-3-oxopropanoate (C1)

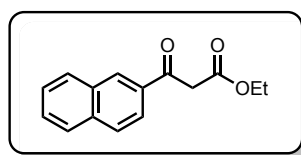

To a stirring slurry of sodium hydride (60% dispersion in mineral oil, 1.12 g, 28.0 mmol, 2.8 eq.) and diethyl carbonate (2.42 mL, 10.0 mmol, 2.0 eq.) in anhydrous THF (10 mL) was added a solution (THF, 6 mL) of 2-acetonaphthone (1.70 g, 10.0 mmol, 1.0 eq.) dropwise over ten minutes. Following addition of the ketone, the reaction mixture was brought to reflux ( $60\text{ }^\circ\text{C}$ ) for 2 hours. After this period, the reaction was quenched by the addition of  $\text{NH}_4\text{Cl}$  (sat. aq.) and diluted in  $\text{Et}_2\text{O}$ . The

reaction was transferred to a separatory funnel and the aqueous layer was extracted (3X) with Et<sub>2</sub>O. The organic layers were combined, filtered over MgSO<sub>4</sub>, and concentrated *in vacuo*. The resulting residue was purified via flash column chromatography using a gradient of 0 to 60% DCM in hexanes (v/v) to provide product **C1** in 90% yield (2.18 g) as a clear yellow oil that solidifies upon cooling to 4 °C. Note that compound **C1** exists as a 5:1 mixture of keto-enol tautomers.

**<sup>1</sup>H NMR:** (400 MHz, CDCl<sub>3</sub>) δ (keto tautomer) 8.45 (s, 1H), 7.99 (m, 2H), 7.89 (m, 2H), 7.61 (m, 2H), 4.23 (q, *J* = 7.1 Hz, 2H), 4.12 (s, 2H), 1.26 (t, *J* = 7.1 Hz, 3H). (enol tautomer) δ 12.68 (s, 1H), 8.36 (s, 1H), 7.85 (m, 2H), 7.78 (m, 1H), 7.53 (m, 3H), 5.81 (s, 1H), 4.30 (q, *J* = 7.1 Hz, 2H), 1.36 (t, *J* = 7.1 Hz, 3H).

**<sup>13</sup>C NMR:** (101 MHz, CDCl<sub>3</sub>) δ (keto tautomer) 192.41, 167.56, 135.80, 133.39, 132.40, 130.57, 129.66, 128.85, 128.69, 127.80, 126.95, 123.80, 61.50, 46.08, 14.07. δ (enol tautomer) 173.20, 171.22, 134.65, 132.81, 130.59, 129.03, 128.23, 127.65, 127.52, 126.68, 126.63, 122.54, 87.84, 60.35, 14.30.

**HR-MS:** (ESI) calcd. for C<sub>15</sub>H<sub>14</sub>O<sub>3</sub> 243.1016 [M + H<sup>+</sup>], found 243.1018

### ethyl 2-(2-naphthoyl)-4-oxopentanoate (**C2**)

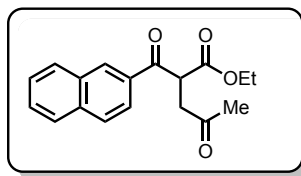

A flame-dried round bottom flask was charged with β-keto ester **C1** (2.18 g, 8.99 mmol, 1.0 eq.), potassium carbonate (1.50 g, 10.80 mmol, 1.2 eq.), and sodium iodide (1.48 g, 9.90 mmol, 1.1 eq.) in 40 mL of dry MeCN. Chloroacetone (796 μL, 9.90 mmol, 1.1 eq.) was added in a single portion and the reaction mixture was heated to 50 °C for 24 hours with vigorous stirring. After this period, the reaction was quenched by the addition of NH<sub>4</sub>Cl (sat. aq.) and diluted in Et<sub>2</sub>O. The reaction was transferred to a separatory funnel and the aqueous layer was extracted (3X) with Et<sub>2</sub>O. The organic layers were combined, filtered over MgSO<sub>4</sub>, and concentrated *in vacuo*. The resulting residue was purified via flash column chromatography using a gradient of 0 to 15% EtOAc in hexanes (v/v) to provide product **C2** in 80% yield (2.15 g) as a clear yellow oil.

**<sup>1</sup>H NMR:** (400 MHz, CDCl<sub>3</sub>) δ 8.61 (s, 1H), 8.06 (dd, *J* = 8.6, 1.8 Hz, 1H), 8.00 (m, 1H), 7.90 (dd, *J* = 9.8, 7.9 Hz, 2H), 7.60 (m, 2H), 5.08 (t, *J* = 6.9 Hz, 1H), 4.15 (q, *J* = 7.1 Hz, 2H), 3.25 (m, 2H), 2.26 (s, 3H), 1.16 (t, *J* = 7.1 Hz, 3H).

**<sup>13</sup>C NMR:** (101 MHz, CDCl<sub>3</sub>) δ 205.45, 194.46, 169.23, 135.77, 133.24, 132.43, 130.94, 129.76, 128.79, 128.55, 127.73, 126.86, 124.20, 61.74, 48.83, 42.31, 29.82, 13.89.

**HR-MS:** (ESI) calcd. for C<sub>18</sub>H<sub>18</sub>O<sub>4</sub> 299.1278 [M + H<sup>+</sup>], found 299.1280

### ethyl 1-((1R,2R)-2-aminocyclohexyl)-5-methyl-2-(naphthalen-2-yl)-1H-pyrrole-3-carboxylate (**C3**)

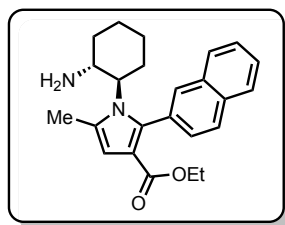

A flame dried round bottom flask was charged with intermediate **C2** (0.834 g, 2.80 mmol, 1.0 eq.) and R,R-trans-1,2-diaminocyclohexane (0.415 g, 3.63 mmol, 1.3 eq.) in 14 mL of anhydrous ethanol. Acetic acid (207 μL, 3.63 mmol, 1.3 eq.) was added and the reaction mixture was heated to 50 °C for 24 hours. After this period, the reaction was quenched by the slow addition of NaHCO<sub>3</sub> (sat. aq.) and diluted in DCM. The reaction was transferred to a separatory funnel and the aqueous layer was extracted (3X) with DCM. The organic layers were combined, filtered over MgSO<sub>4</sub>, and concentrated *in vacuo*. The resulting orange residue was purified via flash column chromatography using a gradient of 0 to 2% MeOH in DCM (v/v) to provide product **C3** in 54% yield (0.563 g) as an orange solid. Note that compound **C3** exists as a 4:1 mixture of rotomers about the CN bond of the pyrrole moiety. Reported NMR data below correspond to the major rotomer.

**<sup>1</sup>H NMR:** (400 MHz, CDCl<sub>3</sub>) δ 7.88 (m, 4H), 7.51 (m, 3H), 6.49 (s, 1H), 4.03 (q, *J* = 7.1 Hz, 2H), 3.56 (m, 1H), 3.20 (td, *J* = 10.6, 3.9 Hz, 1H), 2.46 (s, 3H), 1.96 (m, 2H), 1.69 (m, 2H), 1.26 (m, 5H), 1.00 (m, 4H).

**<sup>13</sup>C NMR:** (101 MHz, CDCl<sub>3</sub>) δ 164.62, 140.31, 132.88, 131.02, 129.32, 128.31, 128.13, 128.01, 127.68, 127.45, 126.29, 126.06, 112.66, 111.23, 108.24, 64.84, 59.06, 52.53, 35.20, 31.68, 25.61, 24.93, 15.01, 14.04.

**HR-MS:** (ESI) calcd. for C<sub>24</sub>H<sub>28</sub>N<sub>2</sub>O<sub>2</sub> 377.2224 [M + H<sup>+</sup>], found 377.2222

[α]<sub>D</sub><sup>22</sup> = +3.0° (c = 1.0, CH<sub>2</sub>Cl<sub>2</sub>)

## Synthesis of HBD catalysts 6-11—final assembly

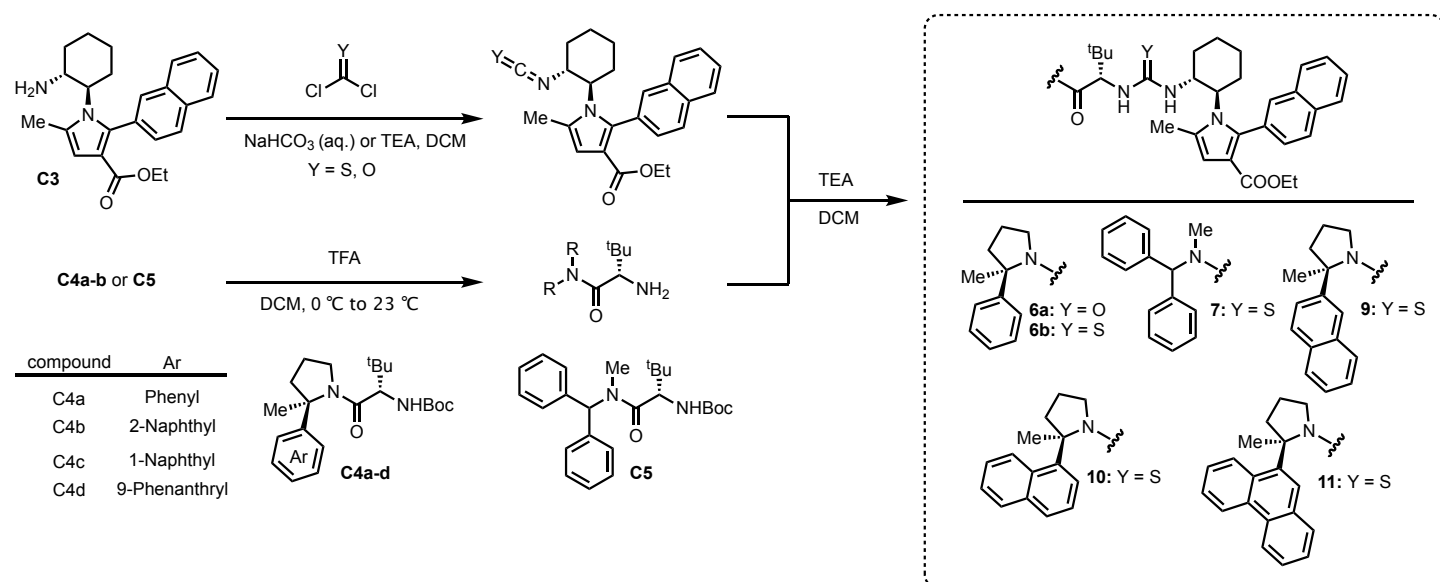

**Figure S2.** Synthesis of chiral pyrrole-based HBD catalysts

Compounds **C4a-d** and **C5** were synthesized according to previously reported routes.<sup>1,3</sup> Characterization data were consistent with these previous reports. Characterization data for **C4b** are provided below.

### General procedure for final catalyst assembly:

#### Synthesis of iso(thio)cyanates derived from **C3**:

To a flame-dried round bottom flask was added amine **C3** (1.0 eq.), DCM (0.1 M with respect to **C3**), and a saturated aqueous solution of sodium bicarbonate (0.1 M with respect to **C3**). (Thio)phosgene (1.0 eq.) was added directly to the DCM layer and following addition, the reaction mixture was stirred vigorously for 1 hour. After this period, the reaction mixture was transferred to a separatory funnel and the aqueous layer was extracted (2X) with DCM. The organic layers were combined, filtered over MgSO<sub>4</sub>, and concentrated *in vacuo* for at least 30 minutes (note: concentration was performed using a rotovap unit installed in a well-ventilated hood in the event that any unreacted (thio)phosgene remained). The resulting orange residue was purified via flash column chromatography using a gradient of 0 to 30% Et<sub>2</sub>O in hexanes (v/v) to provide the iso(thio)cyanate derivative of **C3** as a white solid that was used immediately in the next step. Note: for synthesis of isocyanate derivatives, the above procedure was used with the following modification: triethylamine (1.5 eq.) was used instead of aqueous sodium bicarbonate.

#### Synthesis of (thio)urea catalysts:

Chiral amino acid derived fragments **C4** or **C5** (1.0 eq.) were subjected to treatment with 25% trifluoroacetic acid in DCM (v/v) (overall concentration 0.15 M with respect to **C4** or **C5**) at 0 °C for 30 min followed by warming to room temperature for an additional hour. After this period, reactions were cooled back to 0 °C and carefully quenched with sat. aq. NaHCO<sub>3</sub>. The reaction mixture was transferred to a separatory funnel and the aqueous layer was extracted with DCM (2X). The organic layers were combined, filtered over MgSO<sub>4</sub>, and concentrated *in vacuo*. Finally, a solution of **C3** (1.0 eq.) and triethylamine (1.0 eq.) in DCM (0.2 M with respect to **C3**) was added to the vial containing the free amine and the ensuing reaction was allowed to take place for 12 hours. Reactions were quenched by the addition of sat. aq. NH<sub>4</sub>Cl and were extracted with DCM (2X). The resulting residue was purified via flash column chromatography using a gradient of 0 to 50% Et<sub>2</sub>O in hexanes (v/v) to provide products **6**, **7**, and **9-11** in 68-92% yields as white solids.

#### *tert*-butyl ((*S*)-3,3-dimethyl-1-((*R*)-2-methyl-2-(naphthalen-2-yl)pyrrolidin-1-yl)-1-oxobutan-2-yl)carbamate (**C4b**)

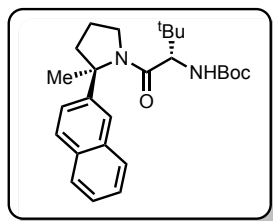

**<sup>1</sup>H NMR:** (400 MHz, CDCl<sub>3</sub>) δ 7.75 (m, 3H), 7.62 (s, 1H), 7.40 (qd, *J* = 6.9, 3.4 Hz, 2H), 7.30 (dd, *J* = 8.6, 2.0 Hz, 1H), 5.16 (d, *J* = 10.0 Hz, 1H), 4.40 (d, *J* = 10.1 Hz, 1H), 4.28 (dt, *J* = 10.0, 6.4 Hz, 1H), 3.89 (dt, *J* = 10.0, 7.4 Hz, 1H), 2.10 (td, *J* = 6.8, 3.1 Hz, 2H), 2.01 (s, 3H), 1.93 (m, 2H), 1.52 (s, 9H), 1.05 (s, 9H).

**<sup>13</sup>C NMR:** (101 MHz, CDCl<sub>3</sub>) δ 170.01, 156.37, 143.67, 133.26, 132.04, 128.07, 127.88, 127.33, 125.67, 125.28, 123.46, 123.12, 79.44, 67.26, 58.76, 50.06, 44.36, 34.82, 28.43, 26.42, 24.94, 22.63.

**HR-MS:** (ESI) calcd. for C<sub>26</sub>H<sub>36</sub>N<sub>2</sub>O<sub>3</sub> 425.2799 [M + H<sup>+</sup>], found 425.2802

[α]<sub>D</sub><sup>22</sup> = +9.0° (c = 1.0, CH<sub>2</sub>Cl<sub>2</sub>)

**ethyl 1-((1R,2R)-2-(3-((S)-3,3-dimethyl-1-((R)-2-methyl-2-phenylpyrrolidin-1-yl)-1-oxobutan-2-yl)ureido)cyclohexyl)-5-methyl-2-(naphthalen-2-yl)-1H-pyrrole-3-carboxylate (6a)**

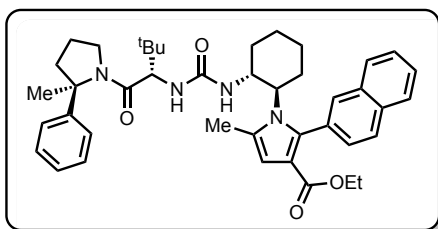

Synthesized according to the general procedure on 0.69 mmol scale. 69% yield, 0.132 g, white solid.

**<sup>1</sup>H NMR:** (400 MHz, CDCl<sub>3</sub>) δ 7.88 (m, 4H), 7.50 (m, 3H), 7.20 (t, *J* = 7.7 Hz, 2H), 7.08 (m, 3H), 6.47 (s, 1H), 4.92 (s, 1H), 4.57 (s, 1H), 4.19 (s, 1H), 4.07 (s, 1H), 3.97 (m, 2H), 3.81 (m, 2H), 3.68 (m, 1H), 2.54 (s, 3H), 2.03 (m, 5H), 1.88 (m, 6H), 1.76 (s, 1H), 1.61 (s, 1H), 1.32 (m, 1H), 0.99 (s, 9H), 0.95 (m, 3H), 0.85 (m, 1H).

**<sup>13</sup>C NMR:** (101 MHz, CDCl<sub>3</sub>) δ 170.12, 164.55, 156.71, 145.75, 139.44, 132.97, 130.82, 130.51, 129.30, 129.14, 128.79, 128.50, 128.22, 127.78, 127.58, 126.41, 126.26, 125.95, 124.43, 112.87, 110.96, 67.12, 60.41, 58.99, 57.87, 51.79, 50.00, 44.37, 35.49, 34.43, 32.61, 26.39, 25.32, 25.09, 24.67, 22.38, 14.95, 14.02.

**HR-MS:** (ESI) calcd. for C<sub>42</sub>H<sub>52</sub>N<sub>4</sub>O<sub>4</sub> 677.4061 [M + H<sup>+</sup>], found 677.4061

[α]<sub>D</sub><sup>22</sup> = +120.0° (c = 0.5, CH<sub>2</sub>Cl<sub>2</sub>)

**ethyl 1-((1R,2R)-2-(3-((S)-3,3-dimethyl-1-((R)-2-methyl-2-phenylpyrrolidin-1-yl)-1-oxobutan-2-yl)thioureido)cyclohexyl)-5-methyl-2-(naphthalen-2-yl)-1H-pyrrole-3-carboxylate (6b)**

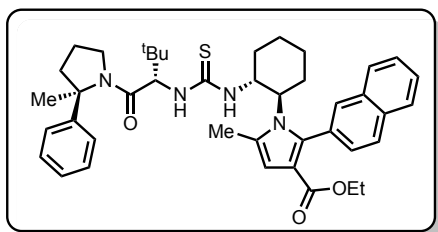

Synthesized according to the general procedure on 2.0 mmol scale. 72% yield, 1.0 g, white solid.

**<sup>1</sup>H NMR:** (400 MHz, CDCl<sub>3</sub>) δ 7.94 (m, 4H), 7.56 (m, 3H), 7.19 (t, *J* = 7.6 Hz, 2H), 7.10 (d, *J* = 8.3 Hz, 3H), 6.49 (s, 1H), 6.02 (m, 1H), 5.44 (d, *J* = 9.6 Hz, 1H), 4.44 (m, 1H), 4.24 (s, 1H), 3.99 (m, 2H), 3.84 (m, 1H), 3.78 (m, 1H), 2.51 (s, 3H), 2.05 (m, 5H), 1.87 (m, 5H), 1.77 (m, 2H), 1.58 (m, 1H), 1.25 (m, 1H), 1.03 (s, 9H), 0.94 (m, 3H), 0.88 (m, 1H).

**<sup>13</sup>C NMR:** (101 MHz, CDCl<sub>3</sub>) δ 181.70, 169.68, 164.43, 145.54, 139.51, 133.00, 131.32, 130.58, 130.21, 129.43, 129.03, 128.78, 128.09, 127.80, 127.52, 127.26, 126.47, 126.24, 125.93, 124.65, 113.26, 111.77, 67.34, 62.88, 59.73, 59.06, 54.94, 50.21, 44.43, 35.83, 33.49, 32.23, 26.51, 25.08, 24.27, 22.42, 15.21, 13.99.

**HR-MS:** (ESI) calcd. for C<sub>42</sub>H<sub>52</sub>N<sub>4</sub>O<sub>3</sub>S 693.3833 [M + H<sup>+</sup>], found 693.3836

[α]<sub>D</sub><sup>22</sup> = +98.0° (c = 0.5, CH<sub>2</sub>Cl<sub>2</sub>)

**ethyl 1-((1R,2R)-2-(3-((S)-1-(benzhydryl(methyl)amino)-3,3-dimethyl-1-oxobutan-2-yl)thioureido)cyclohexyl)-5-methyl-2-(naphthalen-2-yl)-1H-pyrrole-3-carboxylate (7)**

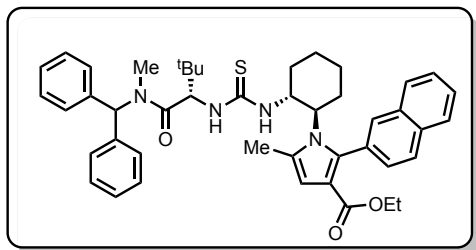

Synthesized according to the general procedure on 0.6 mmol scale. 92% yield, 0.363 g, white solid.

**<sup>1</sup>H NMR:** (400 MHz, CDCl<sub>3</sub>) δ 8.13 (s, 1H), 7.90 (m, 2H), 7.68 (m, 1H), 7.55 (m, 2H), 7.35 (m, 7H), 7.24 (m, 2H), 7.13 (m, 3H), 6.41 (s, 1H), 6.16 (s, 1H), 5.55 (d, *J* = 9.4 Hz, 1H), 5.37 (bs, 1H), 4.46 (bs, 1H), 3.99 (q, *J* = 14.3 Hz, 2H), 3.92 (s, 1H), 3.82 (bs, 1H), 3.05 (s, 3H), 2.52 (s, 3H), 2.22 (d, *J* = 13.0 Hz, 1H), 2.11 (m, 2H), 1.81 (d, *J* = 13.8 Hz, 1H), 1.64 (s, 1H), 1.34 (m, 2H), 1.01 (s, 9H), 0.91 (m, 3H).

**<sup>13</sup>C NMR:** (101 MHz, CDCl<sub>3</sub>) δ 182.12, 172.69, 164.45, 139.36, 139.24, 138.03, 133.01, 131.39, 130.59, 130.27, 129.40, 129.08, 128.67, 128.48, 128.41, 128.08, 127.84, 127.65, 127.29, 127.08, 126.55, 126.40, 113.21, 111.68, 64.14, 61.03, 60.73, 59.82, 59.06, 55.26, 36.04, 33.54, 33.27, 32.22, 26.68, 25.28, 24.35, 15.14, 13.98.

**HR-MS:** (ESI) calcd. for C<sub>45</sub>H<sub>52</sub>N<sub>4</sub>O<sub>3</sub>S 729.3833 [M + H<sup>+</sup>], found 729.3832

[α]<sub>D</sub><sup>22</sup> = +127.6° (c = 0.5, CH<sub>2</sub>Cl<sub>2</sub>)

**ethyl 1-((1R,2R)-2-(3-((S)-3,3-dimethyl-1-((R)-2-methyl-2-(naphthalen-2-yl)pyrrolidin-1-yl)-1-oxobutan-2-yl)thioureido)cyclohexyl)-5-methyl-2-(naphthalen-2-yl)-1H-pyrrole-3-carboxylate (9)**

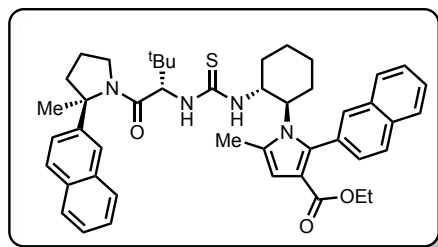

Synthesized according to the general procedure on 0.71 mmol scale. 68% yield, 0.352 g, white solid.

**<sup>1</sup>H NMR:** (400 MHz, CDCl<sub>3</sub>) δ 8.04 (m, 1H), 7.90 (m, 2H), 7.62 (m, 8H), 7.31 (s, 2H), 7.24 (m, 1H), 6.49 (s, 1H), 5.87 (bs, 1H), 5.46 (d, *J* = 9.5 Hz, 2H), 4.54 (m, 1H), 4.00 (m, 3H), 3.90 (m, 1H), 3.71 (m, 1H), 2.46 (s, 3H), 2.10 (td, *J* = 6.8, 1.9 Hz, 2H), 1.99 (s, 4H), 1.93 (m, 2H), 1.67 (m, 2H), 1.35 (m, 1H), 1.05 (s, 9H), 0.92 (m, 6H), 0.67 (q, *J* = 12.4 Hz, 1H).

**<sup>13</sup>C NMR:** (101 MHz, CDCl<sub>3</sub>) δ 181.79, 169.80, 164.41, 143.05, 139.60, 133.16, 132.88, 131.93, 131.34, 130.53, 130.16, 129.45, 129.06, 128.79, 128.08, 127.81, 127.52, 127.30, 127.14, 126.56, 126.35, 125.85, 125.62, 125.23, 123.36, 113.26, 111.82, 67.49, 63.13, 59.74, 59.06, 54.84, 50.27, 44.25, 35.59, 33.44, 32.14, 26.54, 25.08, 24.84, 24.15, 22.62, 15.20, 13.97.

**HR-MS:** (ESI) calcd. for C<sub>46</sub>H<sub>54</sub>N<sub>4</sub>O<sub>3</sub>S 743.3989 [M + H<sup>+</sup>], found 743.3985

[α]<sub>D</sub><sup>22</sup> = +88.4° (c = 0.5, CH<sub>2</sub>Cl<sub>2</sub>)

**ethyl 1-((1R,2R)-2-(3-((S)-3,3-dimethyl-1-((R)-2-methyl-2-(naphthalen-1-yl)pyrrolidin-1-yl)-1-oxobutan-2-yl)thioureido)cyclohexyl)-5-methyl-2-(naphthalen-2-yl)-1H-pyrrole-3-carboxylate (10)**

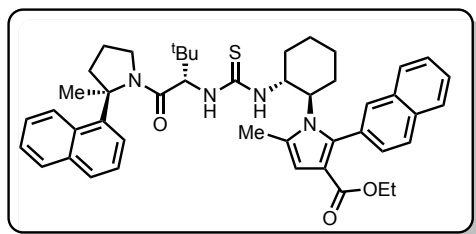

Synthesized according to the general procedure on 0.70 mmol scale. 84% yield, 0.439 g, white solid.

**<sup>1</sup>H NMR:** (400 MHz, CDCl<sub>3</sub>) δ 8.12 (m, 1H), 7.93 (m, 3H), 7.64 (m, 5H), 7.35 (m, 4H), 7.08 (m, 1H), 6.45 (s, 1H), 5.67 (bs, 1H), 5.49 (d, *J* = 9.5 Hz, 1H), 5.28 (m, 1H), 4.57 (bs, 1H), 4.03 (m, 3H), 3.79 (m, 1H), 3.64 (m, 1H), 2.65 (s, 1H), 2.39 (s, 3H), 2.19 (bs, 2H), 2.05 (s, 3H), 1.96 (s, 4H), 1.67 (m, 2H), 1.28 (m, 2H), 1.02 (s, 9H), 0.95 (m, 4H).

**<sup>13</sup>C NMR:** (101 MHz, CDCl<sub>3</sub>) δ 181.51, 169.45, 164.41, 139.49, 134.58, 133.19, 132.97, 131.37, 130.55, 130.18, 129.44, 129.16, 129.01, 128.81, 128.12, 127.87, 127.50, 127.28, 126.56, 126.35, 126.17, 125.57, 125.00, 124.80, 124.38, 124.10, 113.24, 111.80, 67.96, 62.71, 59.59, 59.02, 54.43, 48.92, 40.96, 35.77, 32.82, 32.00, 26.49, 25.06, 24.06, 23.18, 15.13, 13.97.

**HR-MS:** (ESI) calcd. for C<sub>46</sub>H<sub>54</sub>N<sub>4</sub>O<sub>3</sub>S 743.3989 [M + H<sup>+</sup>], found 743.3988

[α]<sub>D</sub><sup>22</sup> = +91.2° (c = 0.5, CH<sub>2</sub>Cl<sub>2</sub>)

**ethyl 1-((1*R*,2*R*)-2-(3-((*S*)-3,3-dimethyl-1-((*R*)-2-methyl-2-(phenanthren-9-yl)pyrrolidin-1-yl)-1-oxobutan-2-yl)thioureido)cyclohexyl)-5-methyl-2-(naphthalen-2-yl)-1*H*-pyrrole-3-carboxylate (**11**)**

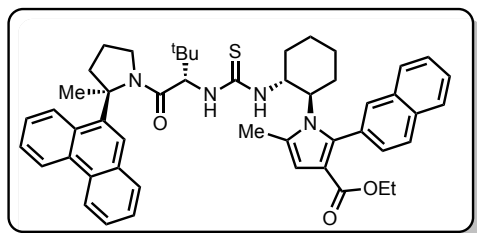

Synthesized according to the general procedure on 0.27 mmol scale. 84% yield, 0.179 g, white solid.

**<sup>1</sup>H NMR:** (400 MHz, CDCl<sub>3</sub>) δ 8.56 (m, 2H), 8.02 (m, 4H), 7.66 (m, 10H), 6.44 (s, 1H), 5.51 (d, *J* = 9.3 Hz, 3H), 4.67 (m, 1H), 4.11 (bs, 1H), 3.99 (m, 2H), 3.72 (m, 2H), 2.71 (s, 1H), 2.37 (s, 3H), 2.12 (m, 5H), 1.93 (s, 3H), 1.64 (m, 2H), 1.27 (m, 1H), 1.03 (s, 9H), 0.92 (m, 6H).

**<sup>13</sup>C NMR:** (101 MHz, CDCl<sub>3</sub>) δ **<sup>13</sup>C NMR** (101 MHz, CDCl<sub>3</sub>) δ 181.57, 169.64, 164.40, 139.52, 133.22, 133.13, 133.01, 131.44, 131.29, 130.57, 130.17, 129.90, 129.52, 129.13, 128.99, 128.87, 128.15, 127.87, 127.77, 127.52, 127.30, 126.59, 126.45, 126.34, 125.58, 125.14, 123.28, 121.90, 113.28, 111.94, 67.81, 62.96, 59.65, 59.04, 54.41, 48.91, 40.35, 35.76, 35.66, 33.09, 32.02, 31.88, 26.52, 24.99, 24.01, 23.11, 15.21, 13.99.

**HR-MS:** (ESI) calcd. for C<sub>50</sub>H<sub>56</sub>N<sub>4</sub>O<sub>3</sub>S 793.4146 [M + H<sup>+</sup>], found 793.4147

[α]<sub>D</sub><sup>25</sup> = +70.0° (c = 0.5, CH<sub>2</sub>Cl<sub>2</sub>)

### 3. Synthesis and Characterization of Substrates 1a-1t, and Intermediates

#### General procedure for the synthesis of substrates 1a-1h, 1p

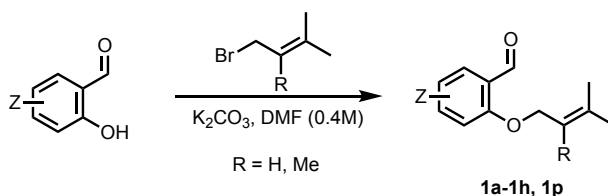

To a stirring suspension of K<sub>2</sub>CO<sub>3</sub> (12.3 mmol, 1.5 eq.) in anhydrous DMF (20 mL) was added salicylaldehyde (8.2 mmol, 1.0 eq.) followed immediately by allylic bromide (10.6 mmol, 1.3 eq.). Reactions were stirred vigorously at room temperature for 24-48 h after which brine (50 mL) was added and reactions were extracted (2X 50 mL) with Et<sub>2</sub>O. The organic layers were combined, filtered over MgSO<sub>4</sub>, and concentrated *in vacuo*. The resulting residue was purified via flash column chromatography using a gradient of 0 to 5% Et<sub>2</sub>O in hexanes (v/v) to provide products **1a-1h, 1p** in 65-98% yield.

#### 2-((3-methylbut-2-en-1-yl)oxy)benzaldehyde (**1a**)

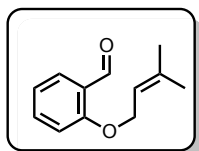

Synthesized according to the general procedure on 8.2 mmol scale. 65% yield (1.02 g, clear colorless oil)

**<sup>1</sup>H NMR:** (400 MHz, CDCl<sub>3</sub>) δ 10.50 (s, 1H), 7.83 (dd, *J* = 7.7, 1.9 Hz, 1H), 7.53 (ddd, *J* = 8.7, 7.4, 1.9 Hz, 1H), 7.00 (m, 2H), 5.51 (t, *J* = 6.7, 1H), 4.64 (d, *J* = 6.6 Hz, 2H), 1.81 (s, 3H), 1.76 (s, 3H).

**<sup>13</sup>C NMR:** (101 MHz, CDCl<sub>3</sub>) δ 189.96, 161.32, 138.67, 135.75, 128.24, 125.10, 120.51, 118.94, 112.92, 65.44, 25.73, 18.25.

**HR-MS:** (APCI) calcd. for C<sub>12</sub>H<sub>14</sub>O<sub>2</sub> 191.1067 [M + H<sup>+</sup>], found 191.1069

#### 3-fluoro-2-((3-methylbut-2-en-1-yl)oxy)benzaldehyde (**1b**)

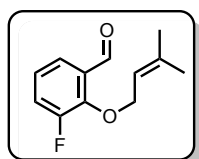

Synthesized according to the general procedure on 5.0 mmol scale. 83% yield (0.87 g, clear colorless oil)

**<sup>1</sup>H NMR:** (400 MHz, CDCl<sub>3</sub>) δ 10.38 (s, 1H), 7.60 (dt, *J* = 7.8, 1.4 Hz, 1H), 7.33 (ddd, *J* = 11.5, 8.1, 1.7 Hz, 1H), 7.10 (td, *J* = 8.0, 4.5 Hz, 1H), 5.50 (tq, *J* = 7.5, 1.4 Hz, 1H), 4.75 (d, *J* = 7.5 Hz, 2H), 1.76 (s, 2H), 1.65 (d, *J* = 1.4 Hz, 3H).

**<sup>13</sup>C NMR:** (101 MHz, CDCl<sub>3</sub>) δ 189.27 (d, *J* = 3.3 Hz), 155.60 (d, *J* = 249.0 Hz), 149.29 (d, *J* = 11.2 Hz), 141.00, 131.00 (d, *J* = 2.1 Hz), 123.55 (d, *J* = 7.3 Hz), 123.01 (d, *J* = 3.3 Hz), 122.49 (d, *J* = 19.3 Hz), 118.73, 71.11 (d, *J* = 6.2 Hz), 25.75, 17.91.

**<sup>19</sup>F NMR:** (376 MHz, CDCl<sub>3</sub>) δ -129.70 (s, 1F).

**HR-MS:** (APCI) calcd. for C<sub>12</sub>H<sub>13</sub>FO<sub>2</sub> 209.0972 [M + H<sup>+</sup>], found 209.0974

#### 4-bromo-2-((3-methylbut-2-en-1-yl)oxy)benzaldehyde (1c)

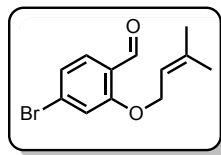

Synthesized according to the general procedure on 1.3 mmol scale. 98% yield (0.33 g, white solid)

**<sup>1</sup>H NMR:** (400 MHz, CDCl<sub>3</sub>) δ 10.42 (s, 1H), 7.69 (d, *J* = 8.6 Hz, 1H), 7.16 (m, 2H), 5.49 (ddq, *J* = 8.1, 5.6, 1.4 Hz, 1H), 4.63 (d, *J* = 6.7 Hz, 2H), 1.83 (s, 3H), 1.78 (s, 3H).

**<sup>13</sup>C NMR:** (101 MHz, CDCl<sub>3</sub>) δ 188.97, 161.43, 139.52, 130.35, 129.45, 124.01, 123.94, 118.25, 116.53, 65.85, 25.78, 18.31.

**HR-MS:** (APCI) calcd. for C<sub>12</sub>H<sub>13</sub>BrO<sub>2</sub> 269.0172 [M + H<sup>+</sup>], found 269.0176

#### 5-chloro-2-((3-methylbut-2-en-1-yl)oxy)benzaldehyde (1d)

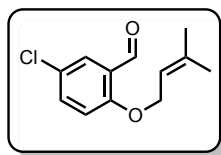

Synthesized according to the general procedure on 2.5 mmol scale. 93% yield (0.520 g, clear colorless oil)

**<sup>1</sup>H NMR:** (400 MHz, CDCl<sub>3</sub>) δ 10.42 (s, 1H), 7.77 (d, *J* = 2.8 Hz, 1H), 7.46 (dd, *J* = 8.9, 2.8 Hz, 1H), 6.94 (d, *J* = 8.9 Hz, 1H), 5.47 (tdt, *J* = 5.6, 2.8, 1.4 Hz, 1H), 4.63 (d, *J* = 6.7 Hz, 2H), 1.81 (s, 3H), 1.76 (s, 3H).

**<sup>13</sup>C NMR:** (101 MHz, CDCl<sub>3</sub>) δ 188.64, 159.73, 139.23, 135.22, 127.78, 126.19, 125.97, 118.52, 114.63, 65.87, 25.74, 18.28.

**HR-MS:** (APCI) calcd. for C<sub>12</sub>H<sub>13</sub>ClO<sub>2</sub> 225.0677 [M + H<sup>+</sup>], found 225.0680

#### 4-fluoro-2-((3-methylbut-2-en-1-yl)oxy)benzaldehyde (1e)

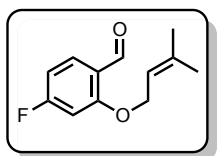

Synthesized according to the general procedure on 4.0 mmol scale. 72% yield (0.60 g, clear colorless oil)

**<sup>1</sup>H NMR:** (400 MHz, CDCl<sub>3</sub>) δ 10.38 (s, 1H), 7.85 (dd, *J* = 8.6, 6.9 Hz, 1H), 6.69 (m, 2H), 5.49 (tdd, *J* = 6.5, 2.9, 1.4 Hz, 1H), 4.62 (d, *J* = 6.7 Hz, 2H), 1.82 (s, 3H), 1.77 (d, 3H).

**<sup>13</sup>C NMR:** (101 MHz, CDCl<sub>3</sub>) δ 188.40, 167.59 (d, *J* = 255.7 Hz), 163.02 (d, *J* = 11.2 Hz), 139.40, 130.61 (d, *J* = 11.7 Hz), 121.88 (d, *J* = 2.6 Hz), 118.28, 107.97 (d, *J* = 22.2 Hz), 100.72 (d, *J* = 25.7 Hz), 65.83, 25.75, 18.29.

**<sup>19</sup>F NMR:** (376 MHz, CDCl<sub>3</sub>) δ -100.85 (s, 1F).

**HR-MS:** (APCI) calcd. for C<sub>12</sub>H<sub>13</sub>FO<sub>2</sub> 209.0972 [M + H<sup>+</sup>], found 209.0974

#### 2-((3-methylbut-2-en-1-yl)oxy)-5-(trifluoromethyl)benzaldehyde (1f)

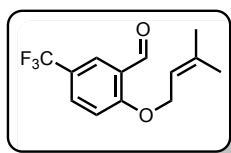

Synthesized according to the general procedure on 2.0 mmol scale. 81% yield (0.414 g, clear colorless oil)

**<sup>1</sup>H NMR:** (400 MHz, CDCl<sub>3</sub>) δ 10.49 (s, 1H), 8.11 (d, *J* = 2.4 Hz, 1H), 7.77 (d, *J* = 8.9 Hz, 1H), 7.09 (d, *J* = 8.8 Hz, 1H), 5.50 (tdd, *J* = 8.1, 6.6, 1.4 Hz, 1H), 4.72 (d, *J* = 6.7 Hz, 2H), 1.83 (ds, 3H), 1.79 (s, 3H).

**<sup>13</sup>C NMR:** (101 MHz, CDCl<sub>3</sub>) δ 188.69, 163.15, 139.74, 132.32 (q, *J* = 3.5 Hz), 125.91 (q, *J* = 3.8 Hz), 124.25 (d, *J* = 199.4 Hz), 123.19, 122.62 (d, *J* = 38.8 Hz), 118.15, 113.21, 65.89, 25.79, 18.35.

**<sup>19</sup>F NMR:** (470 MHz, CDCl<sub>3</sub>) δ -62.08 (s, 3F).



**HR-MS:** (ESI) calcd. for C<sub>13</sub>H<sub>13</sub>F<sub>3</sub>O<sub>2</sub> 282.0793 [M + Na<sup>+</sup>], found 282.0790

### 5-chloro-4-methyl-2-((3-methylbut-2-en-1-yl)oxy)benzaldehyde (1g)

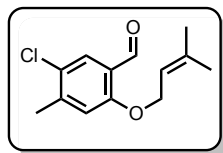

Synthesized according to the general procedure on 1.5 mmol scale. 85% yield (0.299 g, white solid)

**<sup>1</sup>H NMR:** (400 MHz, CDCl<sub>3</sub>) δ 10.37 (s, 1H), 7.78 (s, 1H), 6.87 (s, 1H), 5.49 (ddt, *J* = 6.6, 5.0, 1.4 Hz, 1H), 4.62 (d, *J* = 6.7 Hz, 2H), 2.42 (s, 3H), 1.82 (s, 3H), 1.77 (s, 3H).

**<sup>13</sup>C NMR:** (101 MHz, CDCl<sub>3</sub>) δ 188.47, 159.59, 144.38, 139.10, 128.26, 126.65, 124.25, 118.66, 115.56, 65.79, 25.78, 21.21, 18.30.

**HR-MS:** (APCI) calcd. for C<sub>13</sub>H<sub>15</sub>ClO<sub>2</sub> 239.0833 [M + H<sup>+</sup>], found 239.0837

### 2-((3-methylbut-2-en-1-yl)oxy)-5-nitrobenzaldehyde (1h)

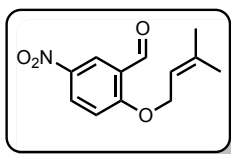

Synthesized according to the general procedure on 1.5 mmol scale. 76% yield (0.264 g, clear colorless oil)

**<sup>1</sup>H NMR:** (400 MHz, CDCl<sub>3</sub>) δ 10.46 (s, 1H), 8.69 (m, 1H), 8.40 (ddt, *J* = 9.2, 2.8, 1.3 Hz, 1H), 7.11 (d, *J* = 9.2 Hz, 1H), 5.50 (tdd, *J* = 6.8, 2.8, 1.5 Hz, 1H), 4.78 (d, *J* = 6.7 Hz, 2H), 1.83 (s, 3H), 1.80 (s, 3H).

**<sup>13</sup>C NMR:** (101 MHz, CDCl<sub>3</sub>) δ 187.74, 165.07, 141.33, 140.52, 130.46, 124.73, 124.49, 117.55, 113.25, 66.55, 25.76, 18.37.

**HR-MS:** (APCI) calcd. for C<sub>12</sub>H<sub>13</sub>NO<sub>4</sub> 236.0917 [M + H<sup>+</sup>], found 236.0921

### 2-((2,3-dimethylbut-2-en-1-yl)oxy)-3-fluorobenzaldehyde (1p)

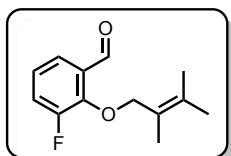

Synthesized according to the general procedure on 1.7 mmol scale using 1-bromo-2,3-dimethylbut-2-ene. The allyl bromide electrophile was synthesized according to the literature.<sup>4</sup> 84% yield (0.312 g, white solid)

**<sup>1</sup>H NMR:** (400 MHz, CDCl<sub>3</sub>) δ 10.38 (s, 1H), 7.61 (dt, *J* = 7.8, 1.4 Hz, 1H), 7.34 (ddd, *J* = 11.5, 8.1, 1.7 Hz, 1H), 7.11 (td, *J* = 8.0, 4.4 Hz, 1H), 4.75 (s, 2H), 1.83 (s, 3H), 1.71 (m, 6H).

**<sup>13</sup>C NMR:** (101 MHz, CDCl<sub>3</sub>) δ 189.19 (d, *J* = 3.3 Hz), 155.67 (d, *J* = 249.3 Hz), 149.84 (d, *J* = 11.1 Hz), 133.72, 130.99 (d, *J* = 2.2 Hz), 123.53 (d, *J* = 7.3 Hz), 123.34, 123.08 (d, *J* = 3.4 Hz), 122.56 (d, *J* = 19.4 Hz), 76.24 (d, *J* = 6.2 Hz), 20.90, 20.21, 17.48.

**<sup>19</sup>F NMR:** (376 MHz, CDCl<sub>3</sub>) δ -129.45 (s, 1F).

**HR-MS:** (APCI) calcd. for C<sub>13</sub>H<sub>15</sub>FO<sub>2</sub> 223.1129 [M + H<sup>+</sup>], found 223.1132

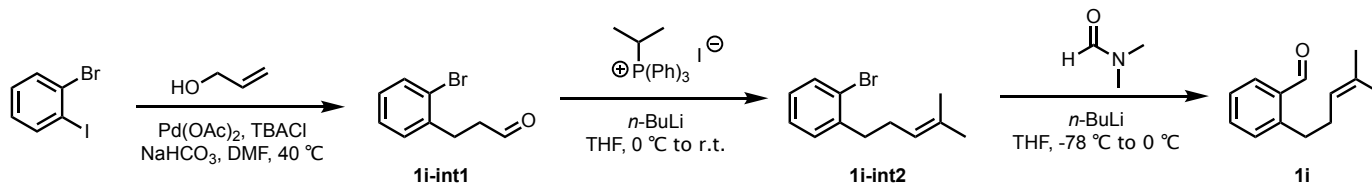

**Figure S3.** Synthesis of substrate **1i**

### 3-(2-bromophenyl)propanal (1i-int1)

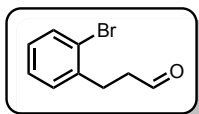

2-bromiodobenzene (1.54 mL, 12.0 mmol, 1.0 eq.), allyl alcohol (1.23 mL, 18.0 mmol, 1.5 eq.), tetrabutyl ammonium chloride (3.33 g, 12.0 mmol, 1.0 eq.), sodium bicarbonate (2.52 g, 30.0 mmol, 2.5 eq.), and palladium acetate (0.053 g, 0.24 mmol, 0.02 eq.) were dissolved in anhydrous DMF (13 mL). The reaction mixture was brought to 40 °C for 48 hours, and after this time, was quenched by the addition of brine (30 mL) and diluted in Et<sub>2</sub>O (50 mL). The reaction was transferred to a separatory funnel and the aqueous layer was extracted (3X 50 mL) with Et<sub>2</sub>O. The organic layers were combined, filtered over MgSO<sub>4</sub>, and concentrated *in vacuo*. The resulting residue was purified

via flash column chromatography using a gradient of 0 to 10% Et<sub>2</sub>O in hexanes (v/v) to provide product **1i-int1** in 69% yield (1.77 g) as a clear colorless oil.

**<sup>1</sup>H NMR:** (400 MHz, CDCl<sub>3</sub>) δ 9.85 (t, *J* = 1.3 Hz, 1H), 7.55 (m, 1H), 7.26 (m, 3H), 7.10 (m, 1H), 3.09 (dd, *J* = 8.1, 7.1 Hz, 3H), 2.82 (td, *J* = 7.6, 1.3 Hz, 3H).

**<sup>13</sup>C NMR:** (101 MHz, CDCl<sub>3</sub>) δ 201.07, 139.66, 132.95, 130.51, 128.12, 127.65, 124.26, 43.66, 28.68.

**HR-MS:** (APCI) calcd. for C<sub>9</sub>H<sub>9</sub>BrO 212.9910 [M + H<sup>+</sup>], found 212.9912

### 1-bromo-2-(4-methylpent-3-en-1-yl)benzene (**1i-int2**)

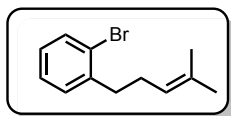

A stirring suspension of isopropyltriphenylphosphonium iodide (4.56 g, 10.6 mmol, 1.5 eq.) in anhydrous THF (15 mL) was cooled to 0 °C before *n*-butyllithium (3.1 mL, 7.74 mmol, 1.1 eq.) was added dropwise over 5 minutes. Upon addition of the organolithium, an immediate dark orange color was observed. After 30 minutes, a solution of aldehyde **1i-int1** (1.50 g, 7.04 mmol, 1.0 eq.) in THF (5 mL) was added slowly and the reaction was allowed to proceed for 24 hours, gradually warming to room temperature. The reaction mixture was quenched by the addition of sat. aq. NH<sub>4</sub>Cl (30 mL) and extracted (3X 50 mL) with Et<sub>2</sub>O. The organic layers were combined, filtered over MgSO<sub>4</sub>, and concentrated *in vacuo*. The resulting residue was purified via flash column chromatography using hexanes as the eluent to provide product **1i-int2** in 66% yield (1.11 g) as a clear colorless oil.

**<sup>1</sup>H NMR:** (400 MHz, CDCl<sub>3</sub>) δ 7.53 (m, 1H), 7.22 (m, 2H), 7.05 (ddd, *J* = 8.0, 6.2, 2.9 Hz, 1H), 5.20 (ddq, *J* = 8.7, 5.8, 1.5 Hz, 1H), 2.75 (m, 2H), 2.31 (m, 2H), 1.70 (s, 3H), 1.58 (s, 3H).

**<sup>13</sup>C NMR:** (101 MHz, CDCl<sub>3</sub>) δ 141.50, 132.68, 132.63, 130.44, 127.41, 127.24, 124.46, 123.21, 36.39, 28.41, 25.67, 17.60.

**HR-MS:** (APCI) calcd. for C<sub>12</sub>H<sub>15</sub>Br 239.0430 [M + H<sup>+</sup>], found 239.0435

### 2-(4-methylpent-3-en-1-yl)benzaldehyde (**1i**)

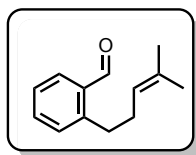

A stirring solution of aryl bromide **1i-int2** (0.50 g, 2.09 mmol, 1.0 eq.) in anhydrous THF (8 mL) was cooled to -78 °C before *n*-butyllithium (1.62 mL, 2.30 mmol, 1.1 eq.) was added dropwise over 5 minutes. After 5 minutes, the reaction was warmed to 0 °C and anhydrous DMF (193 μL, 2.57 mmol, 1.2 eq.) was added. Following 30 minutes of reaction at 0 °C, the reaction mixture was quenched by the addition of sat. aq. NH<sub>4</sub>Cl (10 mL) and extracted (3X 20 mL) with Et<sub>2</sub>O. The organic layers were combined, filtered over MgSO<sub>4</sub>, and concentrated *in vacuo*. The resulting residue was purified via flash column chromatography using a gradient of 0 to 3% Et<sub>2</sub>O in hexanes (v/v) to provide product **1i** in 46% yield (0.18 g) as a clear colorless oil.

**<sup>1</sup>H NMR:** (400 MHz, CDCl<sub>3</sub>) δ 10.28 (s, 1H), 7.84 (dd, *J* = 7.6, 1.5 Hz, 1H), 7.51 (td, *J* = 7.5, 1.5 Hz, 1H), 7.37 (td, *J* = 7.5, 1.2 Hz, 1H), 7.28 (d, *J* = 8.2 Hz, 1H), 5.19 (tp, *J* = 7.4, 1.5 Hz, 1H), 3.06 (m, 2H), 2.31 (q, *J* = 7.5 Hz, 2H), 1.67 (s, 3H), 1.46 (s, 3H).

**<sup>13</sup>C NMR:** (101 MHz, CDCl<sub>3</sub>) δ 191.96, 145.05, 133.83, 133.70, 133.21, 131.11, 130.97, 126.44, 122.79, 32.36, 30.54, 25.62, 17.48.

**HR-MS:** (APCI) calcd. for C<sub>13</sub>H<sub>16</sub>O 189.1274 [M + H<sup>+</sup>], found 189.1274

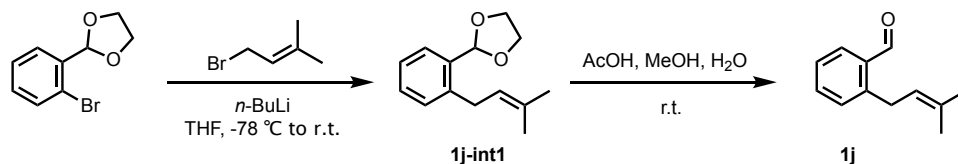

Figure S4. Synthesis of substrate **1j**

### 2-(2-(3-methylbut-2-en-1-yl)phenyl)-1,3-dioxolane (**1j-int1**)

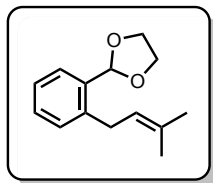

A stirring solution of aryl bromide (297  $\mu\text{L}$ , 2.0 mmol, 1.0 eq.) in anhydrous THF (10 mL) was cooled to  $-78^\circ\text{C}$  before *n*-butyllithium solution (840  $\mu\text{L}$ , 2.1 mmol, 1.05 eq.) was added dropwise over ten minutes. After the reaction was maintained at  $-78^\circ\text{C}$  for 30 minutes, prenyl bromide (242  $\mu\text{L}$ , 2.1 mmol, 1.05 eq.) were added in a single motion. Following addition, the reaction was allowed to proceed at  $-78^\circ\text{C}$  for 30 minutes, after which the ice bath was removed and the reaction slowly warmed to room temperature. After one hour, the reaction was quenched with sat. aq.  $\text{NH}_4\text{Cl}$  (10 mL) and extracted (3X 40 mL) with  $\text{Et}_2\text{O}$ . The organic layers were combined, filtered over  $\text{MgSO}_4$ , and concentrated *in vacuo*. The resulting residue was purified via flash column chromatography using a gradient of 0 to 5%  $\text{Et}_2\text{O}$  in hexanes (v/v) to provide product **1j-int1** in 75% yield (0.327 g) as a clear colorless oil.

**$^1\text{H}$  NMR:** (400 MHz,  $\text{CDCl}_3$ )  $\delta$  7.57 (dd,  $J = 7.6, 1.6$  Hz, 1H), 7.30 (td,  $J = 7.4, 1.6$  Hz, 1H), 7.22 (ddd,  $J = 12.4, 7.2, 1.6$  Hz, 2H), 6.01 (s, 1H), 5.29 (ddp,  $J = 7.2, 5.9, 1.5$  Hz, 1H), 4.16 (m, 2H), 4.05 (m, 2H), 3.49 (d,  $J = 7.2$  Hz, 2H), 1.75 (s, 3H), 1.74 (s, 3H).

**$^{13}\text{C}$  NMR:** (101 MHz,  $\text{CDCl}_3$ )  $\delta$  140.24, 135.02, 132.40, 129.38, 129.11, 125.91, 125.88, 122.91, 101.58, 65.23, 30.88, 25.73, 17.85.

**HR-MS:** (APCI) calcd. for  $\text{C}_{14}\text{H}_{18}\text{O}_2$  219.1380  $[\text{M} + \text{H}^+]$ , found 219.1382

## 2-(3-methylbut-2-en-1-yl)benzaldehyde (**1j**)

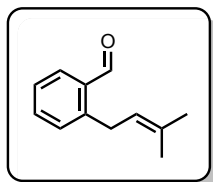

Acetal **1j-int1** (0.327g, 1.5 mmol, 1.0 eq.) was dissolved in a mixture of THF (5 mL) and water (5 mL). Glacial acetic acid (5 mL) was added, and the reaction was allowed to stir at room temperature for 1 hour, before TLC analysis indicated full consumption of the starting material. The crude reaction was then diluted in  $\text{Et}_2\text{O}$  (30 mL) and cooled to  $0^\circ\text{C}$  before sat. aq.  $\text{NaHCO}_3$  (30 mL) was added slowly. After bubbling had ceased, the reaction was transferred to a separatory funnel and the aqueous layer was extracted (3X 40 mL) with  $\text{Et}_2\text{O}$ . The organic layers were combined, filtered over  $\text{MgSO}_4$ , and concentrated *in vacuo*. The resulting residue was purified via flash column chromatography using a gradient of 0 to 15% DCM in hexanes (v/v) to provide product **1j** in 76% yield (0.197 g) as a clear colorless oil.

**$^1\text{H}$  NMR:** (400 MHz,  $\text{CDCl}_3$ )  $\delta$  10.30 (s, 1H), 7.84 (dd,  $J = 7.7, 1.5$  Hz, 1H), 7.52 (td,  $J = 7.5, 1.5$  Hz, 1H), 7.37 (td,  $J = 7.6, 1.2$  Hz, 1H), 7.31 (d,  $J = 7.6$  Hz, 1H), 5.28 (tp,  $J = 7.1, 1.3$  Hz, 1H), 3.77 (d,  $J = 7.0$  Hz, 2H), 1.75 (s, 6H).

**$^{13}\text{C}$  NMR:** (101 MHz,  $\text{CDCl}_3$ )  $\delta$  192.49, 144.46, 133.92, 133.75, 133.07, 131.17, 130.49, 126.47, 122.62, 31.19, 25.69, 17.97.

**HR-MS:** (APCI) calcd. for  $\text{C}_{12}\text{H}_{14}\text{O}$  175.1117  $[\text{M} + \text{H}^+]$ , found 175.1119

## 7-methyloct-6-enal (**1k**)

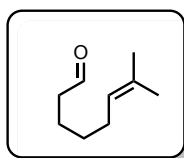

Synthesized according to the literature<sup>5</sup> on 12.0 mmol scale. NMR spectra were in agreement with those reported. 20% yield over 5 steps (0.288 g, clear colorless oil).

**$^1\text{H}$  NMR:** (400 MHz,  $\text{CDCl}_3$ )  $\delta$  9.77 (s, 1H), 5.11 (td,  $J = 7.1, 3.6$  Hz, 1H), 2.43 (td,  $J = 7.4, 1.9$  Hz, 2H), 2.01 (q,  $J = 7.3$  Hz, 2H), 1.69 (s, 3H), 1.64 (m, 2H), 1.61 (s, 3H), 1.38 (tt,  $J = 10.0, 6.5$  Hz, 2H).

**$^{13}\text{C}$  NMR:** (101 MHz,  $\text{CDCl}_3$ )  $\delta$  202.83, 131.90, 123.98, 43.84, 29.33, 27.67, 25.69, 21.69, 17.67.

**HR-MS:** (APCI) calcd. for  $\text{C}_9\text{H}_{16}\text{O}$  141.1274  $[\text{M} + \text{H}^+]$ , found 141.1275

## General procedure for the synthesis of substrates **1l**, **1m**, **1o**, and **1q**

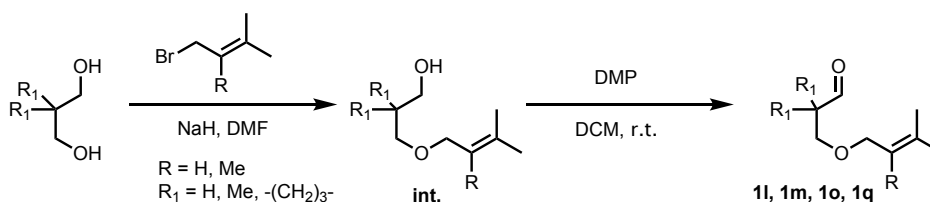

Substrates **1l**, **1m**, **1o**, and **1q** were synthesized according to the following general procedure. *Step 1:* To a slurry of NaH (1.5 eq.) in dry DMF (1.0 M with respect to the diol) was added the appropriate diol (5.0 eq.) and the reaction mixture was allowed to stir for 15 min. Then, allylic bromide (1.0 eq.) was added and the reaction was allowed to stir at room temperature for 24 hours. After this period, the reaction was diluted in NH<sub>4</sub>Cl (sat. aq.) and extracted (2X) with Et<sub>2</sub>O. The organic layers were combined, filtered over MgSO<sub>4</sub>, and was concentrated under reduced pressure. The resulting crude alkylated intermediate (**int.** in the scheme above) was then purified via silica gel chromatography using Et<sub>2</sub>O/hexanes. *Step 2:* Alcohol intermediates (**int.**) were taken in anhydrous DCM (0.2 M) and subjected to treatment with DMP (1.2 eq.) for 1 hour. After this time, the crude reactions were passed through a short pad of silica gel eluting with 50% Et<sub>2</sub>O/hexanes (v/v). The eluent was concentrated under reduced pressure and the resulting residue was purified via flash column chromatography using a gradient of 0 to 5% Et<sub>2</sub>O in hexanes (v/v) to provide products **1l**, **1m**, **1o**, and **1q**.

### 3-((3-methylbut-2-en-1-yl)oxy)propanal (**1l**)

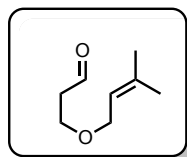

Synthesized according to the general procedure on 3.5 mmol scale. 82% yield (0.402 g, clear colorless oil)

<sup>1</sup>H NMR: (400 MHz, CDCl<sub>3</sub>) δ 9.80 (s, 1H), 5.33 (ddq, *J* = 8.4, 7.0, 1.4 Hz, 1H), 3.99 (d, *J* = 7.0 Hz, 2H), 3.76 (t, *J* = 6.1 Hz, 2H), 2.68 (td, *J* = 6.1, 1.8 Hz, 2H), 1.75 (s, 3H), 1.68 (s, 3H).

<sup>13</sup>C NMR: (101 MHz, CDCl<sub>3</sub>) δ 201.31, 137.53, 120.61, 67.53, 63.52, 43.93, 25.76, 17.98.

HR-MS: (APCI) calcd. for C<sub>8</sub>H<sub>14</sub>O<sub>2</sub> 143.1067 [M + H<sup>+</sup>], found 143.1068

### 2,2-dimethyl-3-((3-methylbut-2-en-1-yl)oxy)propanal (**1m**)

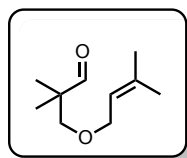

Synthesized according to the general procedure on 1.6 mmol scale. 76% yield (0.202 g, clear colorless oil)

<sup>1</sup>H NMR: (400 MHz, CDCl<sub>3</sub>) δ 9.57 (s, 1H), 5.29 (tt, *J* = 6.7, 1.4 Hz, 1H), 3.95 (d, *J* = 6.8 Hz, 2H), 3.41 (s, 2H), 1.75 (s, 3H), 1.66 (s, 3H), 1.08 (s, 6H).

<sup>13</sup>C NMR: (101 MHz, CDCl<sub>3</sub>) δ 205.61, 136.93, 120.95, 74.94, 67.98, 47.08, 25.75, 19.09, 18.05.

HR-MS: (APCI) calcd. for C<sub>10</sub>H<sub>18</sub>O<sub>2</sub> 171.1380 [M + H<sup>+</sup>], found 171.1382

### 2,2-dimethyl-3-((3-methylbut-2-en-1-yl)oxy)propanal (**1o**)

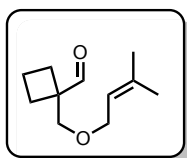

Synthesized according to the general procedure on 1.25 mmol scale. 69% yield (0.158 g, clear colorless oil)

<sup>1</sup>H NMR: (400 MHz, CDCl<sub>3</sub>) δ 9.69 (s, 1H), 5.32 (dddd, *J* = 8.3, 5.6, 2.9, 1.5 Hz, 1H), 3.98 (d, *J* = 6.9 Hz, 2H), 3.68 (s, 2H), 2.31 (m, 2H), 1.94 (m, 4H), 1.75 (s, 3H), 1.67 (s, 3H).

<sup>13</sup>C NMR: (101 MHz, CDCl<sub>3</sub>) δ 203.24, 137.20, 120.88, 72.35, 67.89, 52.42, 25.78, 24.49, 18.06, 15.56.

HR-MS: (APCI) calcd. for C<sub>11</sub>H<sub>18</sub>O<sub>2</sub> 183.1380 [M + H<sup>+</sup>], found 183.1382

### 3-((2,3-dimethylbut-2-en-1-yl)oxy)propanal (**1q**)

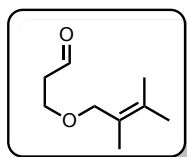

Synthesized according to the general procedure on 1.15 mmol scale. 74% yield (0.132 g, clear colorless oil)

<sup>1</sup>H NMR: (400 MHz, CDCl<sub>3</sub>) δ 9.81 (t, *J* = 2.1 Hz, 1H), 3.99 (s, 2H), 3.72 (t, *J* = 6.1 Hz, 2H), 2.68 (td, *J* = 6.1, 1.9 Hz, 2H), 1.74 (s, 3H), 1.70 (s, 6H).

<sup>13</sup>C NMR: (101 MHz, CDCl<sub>3</sub>) δ 201.42, 130.47, 124.58, 71.77, 63.28, 43.92, 20.84, 20.12, 16.71, 16.66.

HR-MS: (APCI) calcd. for C<sub>9</sub>H<sub>16</sub>O<sub>2</sub> 157.1223 [M + H<sup>+</sup>], found 157.1225

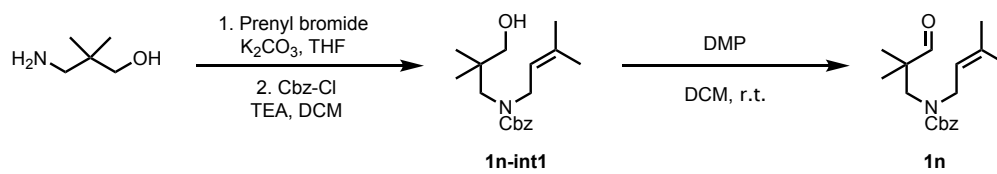

**Figure S5.** Synthesis of substrate **1n**

**benzyl (3-hydroxy-2,2-dimethylpropyl)(3-methylbut-2-en-1-yl)carbamate (1n-int1)**

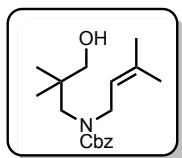

To a stirring solution of 3-amino-2,2-dimethyl-1-propanol (0.516 g, 5.0 mmol, 2.0 eq.) and  $K_2CO_3$  (0.518 g, 3.75 mmol, 1.5 eq.) in THF (13 mL) was added prenyl bromide (288  $\mu$ L, 1.5 mmol, 1.0 eq.) dropwise over two minutes. The allylation reaction was allowed to proceed for 2 hours at room temperature before being diluted in  $Et_2O$  and washed with brine (2X). The organic layer was filtered over  $MgSO_4$ , concentrated *in vacuo*, and the resulting residue was resuspended in DCM (13 mL) and cooled to 0  $^{\circ}C$  before TEA (3.46 mL, 25 mmol, 5.0 eq.) and CbzCl (2.15 mL, 15 mmol, 3.0 eq) were added in succession. After one hour, the reaction was quenched by the addition of sat. aq.  $NaHCO_3$  and extracted with  $Et_2O$  (3X). The organic layers were combined, filtered over  $MgSO_4$ , and concentrated *in vacuo*. The resulting residue was purified via flash column chromatography using a gradient of 0 to 30%  $Et_2O$  in hexanes (v/v) to provide product **1n-int1** in 63% yield (0.48 g) as a clear light yellow oil.

**$^1H$  NMR:** (400 MHz,  $CDCl_3$ )  $\delta$  7.37 (m, 5H), 7.31 (dt,  $J = 7.2, 2.9$  Hz, 1H), 5.16 (s, 3H), 4.71 (d,  $J = 5.2$  Hz, 1H), 4.35 (t,  $J = 7.5$  Hz, 1H), 3.86 (d,  $J = 6.8$  Hz, 2H), 3.18 (d,  $J = 7.5$  Hz, 2H), 3.08 (s, 1H), 1.71 (s, 3H), 1.59 (s, 3H), 0.91 (s, 6H).

**$^{13}C$  NMR:** (101 MHz,  $CDCl_3$ )  $\delta$  158.38, 140.89, 136.48, 135.24, 128.55, 128.47, 128.04, 127.83, 127.64, 126.97, 120.11, 67.94, 67.59, 65.38, 53.56, 47.64, 37.92, 25.67, 23.33, 17.83.

**HR-MS:** (APCI) calcd. for  $C_{18}H_{27}NO_3$  306.2064 [ $M + H^+$ ], found 306.2070

**benzyl (2,2-dimethyl-3-oxopropyl)(3-methylbut-2-en-1-yl)carbamate (1n)**

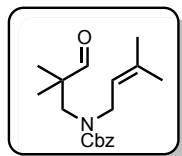

Alcohol intermediate **1n-int1** (0.188 g, 0.62 mmol, 1.0 eq.) was taken in anhydrous DCM (3.1 mL) and subjected to treatment with DMP (0.284 g, 0.67 mmol, 1.1 eq.) for 1 hour. After this time, the crude reaction was passed through a short pad of silica gel eluting with 50%  $Et_2O$ /hexanes (v/v). The eluent was concentrated under reduced pressure and the resulting residue was purified via flash column chromatography using a gradient of 0 to 5%  $Et_2O$  in hexanes (v/v) to provide product **1n** as a clear colorless oil in 85% yield (0.160 g). Note: **1n** exists as a 1.5 : 1 mixture of rotomers about the CN bond of the Cbz group.

**$^1H$  NMR:** (400 MHz,  $CDCl_3$ )  $\delta$  9.48 (s, 1H), 7.35 (m, 5H), 5.10 (m, 3H), 3.84 (m, 2H), 3.35 (m, 2H), 1.64 (m, 6H), 1.07 (m, 6H).

**$^{13}C$  NMR:** (101 MHz,  $CDCl_3$ )  $\delta$  204.42, 156.89, 136.62, 135.46, 128.43, 127.92, 127.79, 120.04, 67.29, 53.34, 52.02, 48.03, 46.78, 25.68, 20.03, 17.82.

**HR-MS:** (APCI) calcd. for  $C_{18}H_{25}NO_3$  304.1907 [ $M + H^+$ ], found 304.1913

**General procedure for the synthesis of substrates 1s-1u**

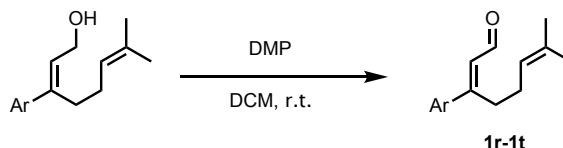

Enal substrates were generated from the corresponding allylic alcohols via Dess-Martin periodinane mediated oxidation. The corresponding allylic alcohol<sup>1</sup> (1.0 eq.) was taken in DCM (0.2 M) and DMP (1.2 eq.) was added in a single portion. The reaction mixture was stirred vigorously for 30 min after which point it was filtered over a short pad of silica gel eluting with 25%  $Et_2O$ /hexanes (v/v). The eluent was concentrated under reduced pressure and the resulting residue was purified via flash column chromatography using a gradient of 0 to 5%  $Et_2O$  in hexanes (v/v) to provide products **1r-1t**.

### (E)-7-methyl-3-phenylocta-2,6-dienal (1r)

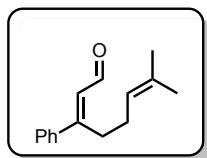

Synthesized according to the general procedure on 0.69 mmol scale. 78% yield (0.116 g, clear colorless oil)

**<sup>1</sup>H NMR:** (400 MHz, CDCl<sub>3</sub>) δ 10.08 (d, *J* = 8.0 Hz, 1H), 7.51 (m, 2H), 7.43 (m, 3H), 6.30 (d, *J* = 8.0 Hz, 1H), 5.12 (ddt, *J* = 8.9, 7.4, 1.5 Hz, 1H), 3.06 (t, *J* = 7.4 Hz, 2H), 2.20 (q, *J* = 7.5 Hz, 2H), 1.67 (s, 3H), 1.50 (s, 3H).

**<sup>13</sup>C NMR:** (101 MHz, CDCl<sub>3</sub>) δ 191.05, 162.13, 139.76, 133.95, 129.83, 128.76, 128.05, 126.70, 122.10, 29.94, 27.98, 25.62, 17.75.

**HR-MS:** (APCI) calcd. for C<sub>15</sub>H<sub>18</sub>O 215.1430 [M + H<sup>+</sup>], found 215.1430

### (E)-3-(4-chlorophenyl)-7-methylocta-2,6-dienal (1s)

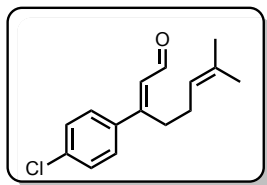

Synthesized according to the general procedure on 2.70 mmol scale. 72% yield (0.483 g, clear yellow oil)

**<sup>1</sup>H NMR:** (400 MHz, CDCl<sub>3</sub>) δ 10.07 (d, *J* = 7.9 Hz, 1H), 7.41 (m, 4H), 6.26 (d, *J* = 7.9 Hz, 1H), 5.09 (tdd, *J* = 6.0, 2.9, 1.5 Hz, 1H), 3.03 (t, *J* = 7.4 Hz, 2H), 2.18 (q, *J* = 7.4 Hz, 2H), 1.66 (s, 3H), 1.49 (s, 3H).

**<sup>13</sup>C NMR:** (101 MHz, CDCl<sub>3</sub>) δ 190.80, 160.52, 138.17, 135.90, 134.17, 129.03, 128.20, 128.00, 121.85, 29.83, 27.85, 25.61, 17.77.

**HR-MS:** (APCI) calcd. for C<sub>15</sub>H<sub>17</sub>ClO 250.1074 [M + H<sup>+</sup>], found 250.1076

### (E)-3-(3-fluorophenyl)-7-methylocta-2,6-dienal (1t)

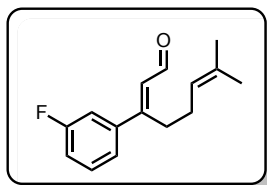

Synthesized according to the general procedure on 1.80 mmol scale. 93% yield (0.389 g, clear yellow oil)

**<sup>1</sup>H NMR:** (400 MHz, CDCl<sub>3</sub>) δ 10.08 (d, *J* = 7.9 Hz, 1H), 7.39 (td, *J* = 8.0, 5.8 Hz, 1H), 7.29 (m, 1H), 7.19 (dt, *J* = 10.1, 2.2 Hz, 1H), 7.12 (m, 1H), 6.28 (d, *J* = 7.9 Hz, 1H), 5.10 (ddt, *J* = 9.0, 7.3, 1.5 Hz, 1H), 3.03 (t, *J* = 7.4 Hz, 2H), 2.20 (q, *J* = 7.4 Hz, 2H), 1.67 (s, 3H), 1.50 (s, 3H).

**<sup>13</sup>C NMR:** (101 MHz, CDCl<sub>3</sub>) δ 190.82, 162.93 (d, *J* = 247.0 Hz), 160.40 (d, *J* = 2.3 Hz), 142.16 (d, *J* = 7.3 Hz), 134.21, 130.34 (d, *J* = 8.3 Hz), 128.60, 122.41 (d, *J* = 2.9 Hz), 121.84, 116.61 (d, *J* = 21.2 Hz), 113.69 (d, *J* = 22.4 Hz), 29.95, 27.83, 25.61, 17.76.

**<sup>19</sup>F NMR:** (376 MHz, CDCl<sub>3</sub>) δ -113.23 (s, 1F).

**HR-MS:** (APCI) calcd. for C<sub>15</sub>H<sub>17</sub>FO 223.1336 [M + H<sup>+</sup>], found 223.1338

## 4. Procedures for Catalytic Enantioselective Prins Cyclization Reactions

### 4.1 Optimization experiments:

#### General procedure A for optimization experiments using various Brønsted Acids:

Hydrogen-bond donor catalyst (10 mol%) and substrate **1a** (0.08 mmol, 1.0 eq.) were weighed directly into a flame-dried 1 dram vial charged with a magnetic stir bar. Anhydrous C<sub>6</sub>D<sub>6</sub> (800 μL) was added, followed by mesitylene internal standard (6 μL). Reactions were initiated by the addition of stock solutions of Brønsted acid (3 μL of 2M solutions in Et<sub>2</sub>O) added through the vial septum cap and were carried out at 23 °C for 24 hours. Following addition of the acid, the punctured septum was replaced immediately and the vial top was wrapped in electrical tape to prevent any volume changes. After 24 hours, a 550 μL aliquot of the reaction mixture was removed for analysis by <sup>1</sup>H NMR. The remaining portion of the reaction was diluted in Et<sub>2</sub>O (500 μL), quenched with triethylamine (0.16 mmol, 2 eq.), passed through a short plug of silica gel eluting with Et<sub>2</sub>O, and concentrated under reduced pressure before determination of enantiomeric excess following TMS derivatization as described below.

#### General procedure B for optimization experiments using AcCl/EtOH:

Hydrogen-bond donor catalyst (2-10 mol%) and substrate (0.08 mmol, 1.0 eq.) were weighed directly into a flame-dried 1 dram vial charged with a magnetic stir bar. Anhydrous C<sub>6</sub>D<sub>6</sub> (800 μL) was added, followed by mesitylene internal standard (6 μL) and a solution of ethanol in anhydrous diethyl ether (12 μL of a 2.0 M solution, 0.024 mmol, 0.3 eq.). Reactions were initiated by the addition of acetyl chloride (12 μL of a 2 M solution, 0.024 mmol, 0.3 eq.) through the septum cap and were carried out at 23 °C for 24 hours. Following addition of AcCl, the punctured septum was replaced immediately and the vial top was wrapped in electrical tape to prevent any volume changes. After the specified period of time, a 550 μL aliquot of the reaction mixture was removed for analysis by <sup>1</sup>H NMR. The remaining portion of the reaction was diluted in Et<sub>2</sub>O (500 μL), quenched with triethylamine (0.16 mmol, 2 eq.), passed through a short plug of silica gel eluting with Et<sub>2</sub>O, and concentrated under reduced pressure before determination of enantiomeric excess following TMS derivatization as described below.

#### 4.2 Scope-scale experiments:

##### General procedure C for enantioselective Prins reactions:

Hydrogen-bond donor catalyst **9** (0.0111 g, 0.015 mmol, 5 mol%) and substrate **1** (0.3 mmol, 1.0 eq.) were weighed directly into a flame-dried 20 mL scintillation vial charged with a magnetic stir bar. Anhydrous toluene (3 mL) was added, followed by a solution of anhydrous ethanol in anhydrous diethyl ether (45 μL of a 2 M solution, 0.1 mmol, 0.3 eq.). Reactions were initiated by the addition of an ethereal solution of acetyl chloride (45 μL of a 2 M solution, 0.1 mmol, 0.3 eq.) and were carried out at 23 °C. After completion of the reaction (as indicated by TLC analysis), a solution of KHMDS in THF (180 μL of a 1 M solution, 0.180 mmol, 0.6 eq.) was added and a dark yellow color was seen to develop. After 10 minutes, the reaction mixture was passed through a plug of silica gel eluting with Et<sub>2</sub>O and concentrated *in vacuo*. The resulting residue was purified via flash column chromatography using Et<sub>2</sub>O and hexanes as the eluents to provide homoallylic alcohol products. Enantiomeric excess of cyclized products was evaluated following TMS derivatization as described below.

##### General procedure D for enantioselective Prins reactions of volatile substrates:

Hydrogen-bond donor catalyst **9** (0.0037 g, 0.01 mmol 5 mol%) and substrate **1** (0.1 mmol, 1.0 eq.) were weighed directly into a flame-dried 1 dram vial charged with a magnetic stir bar. C<sub>6</sub>D<sub>6</sub> (1 mL) and mesitylene internal standard (6 μL) were added, followed by a solution of ethanol in anhydrous diethyl ether (15 μL of a 2 M solution, 0.1 mmol, 0.3 eq.). Reactions were initiated by the addition of an ethereal solution of acetyl chloride (15 μL of a 2 M solution, 0.1 mmol, 0.3 eq.) through the septum cap and were carried out at 23 °C. Following addition of AcCl, 600 μL of the reaction were removed and transferred to an oven-dried 5 mm NMR tube fitted with a rubber septum. After completion of the reaction (5 h), a solution of KHMDS in THF (36 μL of a 1 M solution, 0.036 mmol, 0.6 eq.) was added and a dark yellow color was seen to develop immediately. After 10 minutes, the reaction mixture was analyzed by <sup>1</sup>H NMR to determine the yield of cyclized products against the mesitylene internal standard. The reaction mixture was then passed through a plug of silica gel eluting with Et<sub>2</sub>O and concentrated *in vacuo*. Enantiomeric excess values were evaluated by chiral GC following the TMS derivatization as described below.

#### 4.3 Gram-scale synthesis of **2b**:

Hydrogen-bond donor catalyst **9** (0.0371 g, 0.05 mmol, 1 mol%) and substrate **1b** (1.04 g, 5.0 mmol, 1.0 eq.) were weighed directly into a flame-dried 20 mL vial and then transferred (using 5 mL of anhydrous toluene) to a flame-dried 200 mL round bottom flask charged with a magnetic stir bar. Anhydrous toluene (45 mL) was added, followed by a solution of HCl in Et<sub>2</sub>O (2 M, 1.5 mol, 0.3 eq.), which was added dropwise over a 5 minute period. After one hour at 23 °C, the reaction was observed to have proceeded to full conversion by TLC (30% Et<sub>2</sub>O in hexanes, v/v) and a solution of KHMDS in THF (2.25 mL of a 1 M solution, 2.25 mmol, 0.45 eq.) was added. After 10 minutes, 50 mL of sat. aq. NH<sub>4</sub>Cl were added, followed by 100 mL of Et<sub>2</sub>O, and the biphasic mixture was transferred to a separatory funnel. The organic layer was washed with sat. aq. NH<sub>4</sub>Cl (2X), filtered over MgSO<sub>4</sub>, and concentrated *in vacuo*. The resulting residue was purified via flash column chromatography using a gradient of 0 to 30% Et<sub>2</sub>O in hexanes (v/v) to provide product **2b** in 71% yield (0.744 g) as a white solid. 0.023 g of catalyst **9** were recovered from the reaction (62% recovery). Enantiomeric excess of **2b** was evaluated following TMS derivatization as described below and was found to be 96% ee. **2b** could be recrystallized from 2:1 (v/v) hexanes/DCM to provide product in 99% ee.

##### General procedure for racemic Prins reactions:

Substrate **1** (0.05 mmol) was weighed directly into a flame-dried 1-dram vial charged with a magnetic stir bar. Anhydrous toluene (500 μL) was added, followed by HCl (12.5 μL of a 2 M solution in Et<sub>2</sub>O, 0.025 mmol, 0.5 eq.) and reactions were allowed to stir at 23 °C for 24-72 hours. After this time, the solvent was evaporated under reduced pressure and the crude reaction mixture was analyzed by chiral GC or HPLC following the TMS derivatization as described below.

##### General procedure for silylation of compounds **2** for determination of enantiomeric excess:

Chiral homoallylic alcohol products **2** were in some cases derivatized to the corresponding TMS protected ethers prior to evaluation of ee using the following procedure. TMS protection was used to achieve superior separation using chiral GC as well as enhanced volatility. To a flame-dried vial charged with homoallylic alcohol (0.05 mmol, 1 eq.) was added DCM (500  $\mu$ L) and TEA (0.35 mmol, 7 eq.). TMSCl (0.15 mmol, 3 eq.) was added and the reaction was allowed to proceed at 23  $^{\circ}$ C for 5 minutes. After this period, the reaction was concentrated under reduced pressure and the resulting solid white residue was taken in Et<sub>2</sub>O (1.5 mL) and filtered through a 0.2  $\mu$ M filter directly into a GC vial. Enantioselectivity values were determined for products **2h**, **2n**, and **2p** as the free alcohols without derivatization. Product **2m** was protected as the acetate using the above procedure with Ac<sub>2</sub>O in place of TMSCl.

## 5. Synthesis and Characterization of Products 2a-2t

### 5.1 Tabulated characterization data

#### (3*S*,4*R*)-3-(prop-1-en-2-yl)chroman-4-ol (**2a**)

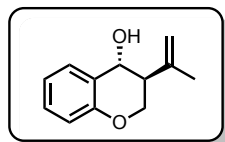

Synthesized from **1a** according to general procedure C on 0.3 mmol scale using 5 mol% of catalyst **9**. 24 h reaction time. 79% yield (0.045 g, white solid), d.r. = 35 : 1 (crude material), d.r. = 39 : 1 (purified material).

**<sup>1</sup>H NMR:** (400 MHz, CDCl<sub>3</sub>)  $\delta$  7.47 (dt,  $J$  = 7.7, 1.2 Hz, 1H), 7.20 (ddd,  $J$  = 8.6, 7.5, 1.7 Hz, 1H), 6.96 (td,  $J$  = 7.5, 1.2 Hz, 1H), 6.83 (dd,  $J$  = 8.3, 1.2 Hz, 1H), 5.02 (s, 1H), 4.87 (s, 1H), 4.83 (d,  $J$  = 7.7 Hz, 1H), 4.28 (dd,  $J$  = 11.2, 3.5 Hz, 1H), 4.10 (dd,  $J$  = 11.2, 8.8 Hz, 1H), 2.60 (td,  $J$  = 8.2, 3.5 Hz, 1H), 2.00 (s, 1H), 1.85 (s, 3H).

**<sup>13</sup>C NMR:** (101 MHz, CDCl<sub>3</sub>)  $\delta$  153.98, 142.00, 129.18, 128.18, 124.51, 120.81, 116.42, 113.77, 67.05, 66.55, 47.78, 21.49.

**HR-MS:** (ESI) calcd. for C<sub>12</sub>H<sub>14</sub>O<sub>2</sub> 191.1067 [M + H<sup>+</sup>], found 191.1067

$[\alpha]_D^{22} = +17.0^{\circ}$  (c = 1.0, CH<sub>2</sub>Cl<sub>2</sub>)

#### (3*S*,4*R*)-3-(2-chloropropan-2-yl)chroman-4-ol (**3a**)

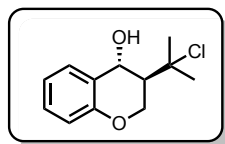

Synthesized from **1a**. **3a** was found to be inseparable from **2a** using conventional silica gel chromatography. Characterization was performed on a 3:1 mixture of **3a** and **2a**. The data presented below correspond to **3a**.

**<sup>1</sup>H NMR:** (400 MHz, CDCl<sub>3</sub>)  $\delta$  7.41 (m, 1H), 7.23 (m, 1H), 6.99 (m, 1H), 6.85 (m, 1H), 4.99 (m, 1H), 4.35 (m, 2H), 2.30 (dt,  $J$  = 5.4, 4.0 Hz, 1H), 1.73 (s, 3H), 1.59 (s, 3H).

**<sup>13</sup>C NMR:** (101 MHz, CDCl<sub>3</sub>)  $\delta$  154.61, 129.61, 129.56, 124.80, 121.45, 116.82, 71.54, 65.47, 64.60, 52.43, 31.50, 31.27.

**HR-MS:** (APCI) calcd. for C<sub>12</sub>H<sub>15</sub>ClO<sub>2</sub> 261.0455 [M + Cl<sup>-</sup>], found 261.0455

#### (3*S*,4*R*)-8-fluoro-3-(prop-1-en-2-yl)chroman-4-ol (**2b**)

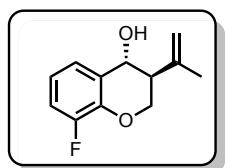

Synthesized from **1b** according to general procedure C on 0.3 mmol scale using 5 mol% of catalyst **9**. 3 h reaction time. 80% yield (0.050 g, white solid), d.r. = 31 : 1 (crude material), d.r. = 33 : 1 (purified material).

**<sup>1</sup>H NMR:** (400 MHz, CDCl<sub>3</sub>)  $\delta$  7.25 (d,  $J$  = 7.8 Hz, 1H), 7.01 (ddd,  $J$  = 10.6, 8.2, 1.6 Hz, 1H), 6.88 (td,  $J$  = 7.9, 4.8 Hz, 1H), 5.04 (s, 1H), 4.89 (s, 1H), 4.85 (dd,  $J$  = 7.9, 4.9 Hz, 1H), 4.38 (dd,  $J$  = 11.3, 3.6 Hz, 1H), 4.17 (dd,  $J$  = 11.2, 8.9 Hz, 1H), 2.63 (td,  $J$  = 8.4, 3.6 Hz, 1H), 2.04 (m, 1H), 1.85 (s, 3H).

**<sup>13</sup>C NMR:** (101 MHz, CDCl<sub>3</sub>)  $\delta$  151.08 (d,  $J$  = 245.0 Hz), 142.37 (d,  $J$  = 11.3 Hz), 141.47, 126.97 (d,  $J$  = 1.4 Hz), 123.03 (d,  $J$  = 3.6 Hz), 120.22 (d,  $J$  = 7.0 Hz), 115.40 (d,  $J$  = 17.8 Hz), 114.18, 67.00, 66.65 (d,  $J$  = 3.0 Hz), 47.48, 21.43.

**<sup>19</sup>F NMR:** (376 MHz, CDCl<sub>3</sub>)  $\delta$  -138.01 (s, 1F)

**HR-MS:** (APCI) calcd. for C<sub>12</sub>H<sub>13</sub>FO<sub>2</sub> 209.0972 [M + H<sup>+</sup>], found 209.0974

$[\alpha]_D^{22} = +22.2^{\circ}$  (c = 1.0, CH<sub>2</sub>Cl<sub>2</sub>)



### (3*S*,4*R*)-7-bromo-3-(prop-1-en-2-yl)chroman-4-ol (2c)

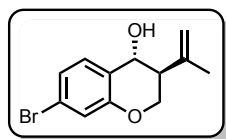

Synthesized from **1c** according to general procedure C on 0.3 mmol scale using 5 mol% of catalyst **9**. 24 h reaction time. 77% yield (0.062 g, white solid), d.r. = 26 : 1 (crude material), d.r. = 34 : 1 (purified material).

**<sup>1</sup>H NMR:** (400 MHz, CDCl<sub>3</sub>) δ 7.33 (d, *J* = 8.2 Hz, 1H), 7.08 (dd, *J* = 8.3, 2.0 Hz, 1H), 7.00 (d, *J* = 2.0 Hz, 1H), 5.03 (s, 1H), 4.87 (s, 1H), 4.76 (dd, *J* = 7.9, 4.6 Hz, 1H), 4.27 (dd, *J* = 11.2, 3.6 Hz, 1H), 4.09 (dd, *J* = 11.3, 8.9 Hz, 1H), 2.57 (td, *J* = 8.4, 3.6 Hz, 1H), 2.02 (m, 1H) 1.84 (s, 3H).

**<sup>13</sup>C NMR:** (101 MHz, CDCl<sub>3</sub>) δ 154.76, 141.54, 129.50, 123.92, 123.55, 122.18, 119.51, 114.11, 66.81, 66.66, 47.49, 21.41.

**HR-MS:** (APCI) calcd. for C<sub>12</sub>H<sub>13</sub>BrO<sub>2</sub> 269.0172 [M + H<sup>+</sup>], found 269.0171

[α]<sub>D</sub><sup>22</sup> = +2.2° (c = 1.0, CH<sub>2</sub>Cl<sub>2</sub>)

### (3*S*,4*R*)-6-chloro-3-(prop-1-en-2-yl)chroman-4-ol (2d)

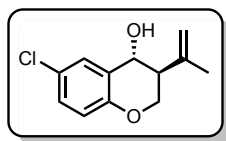

Synthesized from **1d** according to general procedure C on 0.3 mmol scale using 5 mol% of catalyst **9**. 24 h reaction time. 84% yield (0.056 g, white solid), d.r. = 22 : 1 (crude material), d.r. = 26 : 1 (purified material).

**<sup>1</sup>H NMR:** (400 MHz, CDCl<sub>3</sub>) δ 7.46 (dd, *J* = 2.6, 0.9 Hz, 1H), 7.13 (m, 1H), 6.75 (d, *J* = 8.7 Hz, 1H), 5.04 (s, 1H), 4.88 (s, 1H), 4.78 (dd, *J* = 8.1, 4.9 Hz, 1H), 4.26 (dd, *J* = 11.3, 3.6 Hz, 1H), 4.07 (dd, *J* = 11.3, 9.2 Hz, 1H), 2.57 (td, *J* = 8.7, 3.6 Hz, 1H), 2.06 (s, 1H), 1.83 (s, 3H).

**<sup>13</sup>C NMR:** (101 MHz, CDCl<sub>3</sub>) δ 152.57, 141.55, 129.11, 127.82, 125.97, 125.59, 117.80, 114.16, 66.84, 66.80, 47.53, 21.36.

**HR-MS:** (APCI) calcd. for C<sub>12</sub>H<sub>13</sub>ClO<sub>2</sub> 225.0677 [M + H<sup>+</sup>], found 225.0677

[α]<sub>D</sub><sup>22</sup> = -7.0° (c = 1.0, CH<sub>2</sub>Cl<sub>2</sub>)

### (3*S*,4*R*)-7-fluoro-3-(prop-1-en-2-yl)chroman-4-ol (2e)

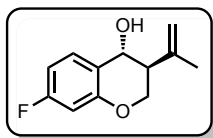

Synthesized from **1e** according to general procedure C on 0.3 mmol scale using 5 mol% of catalyst **9**. 24 h reaction time. 72% yield (0.045 g, white solid), d.r. = 30 : 1 (crude material), d.r. = 31 : 1 (purified material).

**<sup>1</sup>H NMR:** (400 MHz, CDCl<sub>3</sub>) δ 7.41 (dd, *J* = 8.6, 6.6 Hz, 1H), 6.68 (m, 1H), 6.54 (dd, *J* = 10.2, 2.5 Hz, 1H), 5.02 (s, 1H), 4.86 (s, 1H), 4.79 (dd, *J* = 7.7, 4.0 Hz, 1H), 4.28 (dd, *J* = 11.2, 3.5 Hz, 1H), 4.11 (dd, *J* = 11.2, 8.6 Hz, 1H), 2.57 (td, *J* = 8.2, 3.6 Hz, 1H), 1.99 (s, 1H), 1.83 (s, 3H).

**<sup>13</sup>C NMR:** (101 MHz, CDCl<sub>3</sub>) δ 163.05 (d, *J* = 245.6 Hz), 155.16 (d, *J* = 12.3 Hz), 141.66, 129.51 (d, *J* = 10.1 Hz), 120.42 (d, *J* = 3.1 Hz), 113.98, 108.10 (d, *J* = 21.8 Hz), 103.46 (d, *J* = 24.6 Hz), 66.74, 66.60, 47.58, 21.48.

**<sup>19</sup>F NMR:** (376 MHz, CDCl<sub>3</sub>) δ -113.58 (s, 1F)

**HR-MS:** (APCI) calcd. for C<sub>12</sub>H<sub>13</sub>FO<sub>2</sub> 209.0972 [M + H<sup>+</sup>], found 209.0975

[α]<sub>D</sub><sup>22</sup> = +10.0° (c = 1.0, CH<sub>2</sub>Cl<sub>2</sub>)

### (3*S*,4*R*)-3-(prop-1-en-2-yl)-6-(trifluoromethyl)chroman-4-ol (2f)

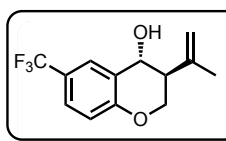

Synthesized from **1f** according to general procedure C on 0.3 mmol scale using 5 mol% of catalyst **9**. 15 h reaction time. 81% yield (0.063 g, white solid), d.r. = 22 : 1 (crude material), d.r. = 24 : 1 (purified material).

**<sup>1</sup>H NMR:** (500 MHz, CDCl<sub>3</sub>) 7.78 (s, 1H), 7.44 (d, *J* = 8.6 Hz, 1H), 6.89 (d, *J* = 8.6 Hz, 1H), 5.07 (s, 1H), 4.91 (s, 1H), 4.84 (d, *J* = 8.3 Hz, 1H), 4.33 (dd, *J* = 11.3, 3.6 Hz, 1H), 4.13 (dd, *J* = 11.3, 9.4 Hz, 1H), 2.61 (td, *J* = 8.8, 3.6 Hz, 1H), 2.09 (br, 1H), 1.85 (s, 3H).

**<sup>13</sup>C NMR:** (101 MHz, CDCl<sub>3</sub>) δ 156.53, 141.29, 126.21 (q, *J* = 3.6 Hz), 125.69 (q, *J* = 3.9 Hz), 124.78, 123.07 (d, *J* = 14.1 Hz), 122.82, 116.82, 114.41, 67.06, 66.64, 47.39, 21.32.

**<sup>19</sup>F NMR:** (470 MHz, CDCl<sub>3</sub>) δ -61.58 (s, 3F)

**HR-MS:** (ESI) calcd. for C<sub>13</sub>H<sub>13</sub>F<sub>3</sub>O<sub>2</sub> 258.0828 [M + H<sup>+</sup>], found 258.0826

[α]<sub>D</sub><sup>22</sup> = +2.2° (c = 1.0, CDCl<sub>3</sub>)

### (3*S*,4*R*)-6-chloro-7-methyl-3-(prop-1-en-2-yl)chroman-4-ol (2g)

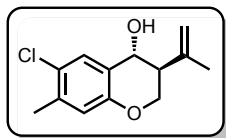

Synthesized from **1g** according to general procedure C on 0.3 mmol scale using 5 mol% of catalyst **9**. 24 h reaction time. 77% yield (0.055 g, white solid), d.r. = 23 : 1 (crude material), d.r. = 28 : 1 (purified material).

**<sup>1</sup>H NMR:** (400 MHz, CDCl<sub>3</sub>) δ 7.42 (s, 1H), 6.69 (s, 1H), 5.02 (s, 1H), 4.86 (s, 1H), 4.76 (dd, *J* = 7.8, 4.6 Hz, 1H), 4.25 (ddd, *J* = 11.3, 3.5, 1.1 Hz, 1H), 4.06 (dd, *J* = 11.2, 8.8 Hz, 1H), 2.54 (td, *J* = 8.3, 3.5 Hz, 1H), 2.31 (s, 3H), 2.00 (m, 1H), 1.83 (s, 3H).

**<sup>13</sup>C NMR:** (101 MHz, CDCl<sub>3</sub>) δ 152.41, 141.70, 137.00, 128.21, 125.98, 123.47, 118.50, 113.95, 66.64, 66.62, 47.63, 21.47, 19.91.

**HR-MS:** (APCI) calcd. for C<sub>13</sub>H<sub>15</sub>ClO<sub>2</sub> 239.0833 [M + H<sup>+</sup>], found 239.0834

[α]<sub>D</sub><sup>22</sup> = -5.0° (c = 1.0, CH<sub>2</sub>Cl<sub>2</sub>)

### (3*S*,4*R*)-6-nitro-3-(prop-1-en-2-yl)chroman-4-ol (2h)

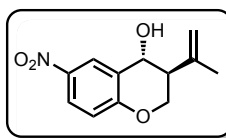

Synthesized from **1h** according to general procedure C on 0.3 mmol scale using 5 mol% of catalyst **9**. 24 h reaction time. 79% yield (0.056 g, light yellow solid), d.r. = 17 : 1 (crude material), d.r. = 20 : 1 (purified material).

**<sup>1</sup>H NMR:** (400 MHz, CDCl<sub>3</sub>) δ 8.43 (s, 1H), 8.08 (d, *J* = 9.1 Hz, 1H), 6.89 (d, *J* = 9.1 Hz, 1H), 5.09 (s, 1H), 4.92 (s, 1H), 4.86 (dd, *J* = 8.5, 3.6 Hz, 1H), 4.40 (dd, *J* = 11.4, 3.8 Hz, 1H), 4.18 (dd, *J* = 11.5, 9.5 Hz, 1H), 2.62 (td, *J* = 9.0, 3.8 Hz, 1H), 2.32 (m, 1H), 1.85 (s, 3H).

**<sup>13</sup>C NMR:** (101 MHz, CDCl<sub>3</sub>) δ 159.29, 141.49, 140.78, 125.12, 125.02, 124.72, 117.04, 114.78, 67.55, 66.39, 46.97, 21.29.

**HR-MS:** (APCI) calcd. for C<sub>12</sub>H<sub>13</sub>NO<sub>4</sub> 236.0917 [M + H<sup>+</sup>], found 236.0920

[α]<sub>D</sub><sup>22</sup> = -29.2° (c = 1.0, CH<sub>2</sub>Cl<sub>2</sub>)

### (1*R*,2*R*)-2-(prop-1-en-2-yl)-1,2,3,4-tetrahydronaphthalen-1-ol (2i)

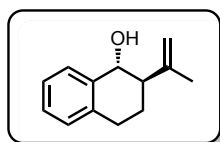

Synthesized from **1i** according to general procedure C on 0.3 mmol scale using 5 mol% of catalyst **9**. 4 h reaction time. 73% yield (0.041 g, white solid), d.r. = 16 : 1 (crude material), d.r. = 16 : 1 (purified material).

**<sup>1</sup>H NMR:** (400 MHz, CDCl<sub>3</sub>) δ 7.62 (d, *J* = 7.7 Hz, 1H), 7.22 (dtd, *J* = 18.0, 7.3, 1.6 Hz, 2H), 7.10 (d, *J* = 7.1 Hz, 1H), 4.97 (s, 1H), 4.90 (s, 1H), 4.71 (dd, *J* = 9.5, 4.1 Hz, 1H), 2.86 (m, 2H), 2.39 (ddd, *J* = 12.1, 9.4, 3.1 Hz, 1H), 2.07 (m, 1H), 1.91 (m, 2H), 1.82 (s, 3H).

**<sup>13</sup>C NMR:** (101 MHz, CDCl<sub>3</sub>) δ 146.16, 138.54, 136.08, 128.39, 127.15, 127.03, 126.18, 112.96, 70.04, 51.27, 28.99, 26.18, 19.29.

**HR-MS:** (APCI) calcd. for C<sub>13</sub>H<sub>16</sub>O 188.1162 [M + H<sup>+</sup>], found 188.1155

[α]<sub>D</sub><sup>22</sup> = -38.6° (c = 1.0, CH<sub>2</sub>Cl<sub>2</sub>)

### (1*R*,2*R*)-2-(prop-1-en-2-yl)-2,3-dihydro-1*H*-inden-1-ol (2j)

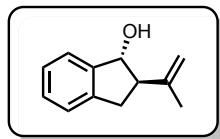

Synthesized from **1j** according to general procedure C on 0.3 mmol scale using 5 mol% of catalyst **9**. 24 h reaction time. 55% yield (0.029 g, white solid), d.r. = 12 : 1 (crude material), d.r. = 13 : 1 (purified material).

**<sup>1</sup>H NMR:** (400 MHz, CDCl<sub>3</sub>) δ 7.41 (m, 1H), 7.25 (m, 3H), 5.12 (m, 1H), 4.96 (s, 1H), 4.91 (s, 1H), 3.08 (m, 1H), 2.85 (m, 2H), 1.92 (m, 1H), 1.86 (s, 3H).

**<sup>13</sup>C NMR:** (101 MHz, CDCl<sub>3</sub>) δ 144.92, 144.32, 141.10, 128.09, 126.84, 124.61, 123.80, 111.67, 78.90, 58.37, 34.69, 20.68.

**HR-MS:** (APCI) calcd. for C<sub>12</sub>H<sub>14</sub>O 175.1117 [M + H<sup>+</sup>], found 175.1119

[α]<sub>D</sub><sup>22</sup> = +19.0° (c = 1.0, CH<sub>2</sub>Cl<sub>2</sub>)

#### (1*S*,2*R*)-2-(prop-1-en-2-yl)cyclohexan-1-ol (**2k**)

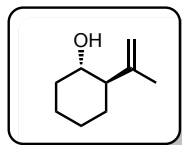

Synthesized from **1k** according to general procedure D for volatile substrates on 0.1 mmol scale using 5 mol% of catalyst **9**. 5 h reaction time. 54% yield of the trans diastereomer by <sup>1</sup>H NMR. Yield assessed from crude reaction mixture using mesitylene as an internal quantitative standard. d.r. = 2 : 1 (crude material).

**<sup>1</sup>H NMR:** (600 MHz, CDCl<sub>3</sub>) δ 4.91 (s, 1H), 4.87 (s, 1H), 3.44 (td, *J* = 9.9, 4.2 Hz, 1H), 2.08 (m, 1H), 1.94 (m, 1H), 1.87 (s, 1H), 1.79 (m, 1H), 1.73 (s, 3H), 1.69 (m, 2H), 1.27 (m, 4H).

**<sup>13</sup>C NMR:** (101 MHz, CDCl<sub>3</sub>) δ 146.65, 112.80, 70.70, 54.59, 34.07, 30.17, 25.65, 24.86, 19.17.

**HR-MS:** (APCI) calcd. for C<sub>9</sub>H<sub>16</sub>O 141.1274 [M + H<sup>+</sup>], found 141.1273

[α]<sub>D</sub><sup>22</sup> = -4.8° (c = 0.25, CH<sub>2</sub>Cl<sub>2</sub>)

#### (3*S*,4*S*)-3-(prop-1-en-2-yl)tetrahydro-2*H*-pyran-4-ol (**2l**)

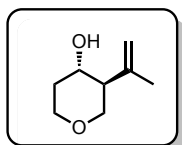

Synthesized from **1l** according to general procedure D for volatile substrates on 0.1 mmol scale using 5 mol% of catalyst **9**. 5 h reaction time. 50% yield of the trans diastereomer by <sup>1</sup>H NMR, d.r. = 2 : 1 (crude material). Yield and d.r. assessed from crude reaction mixture using mesitylene as an internal quantitative standard.

**<sup>1</sup>H NMR:** (400 MHz, CDCl<sub>3</sub>) δ 5.00 (s, 1H), 4.92 (s, 1H), 3.87 (ddd, *J* = 11.4, 4.8, 1.4 Hz, 1H), 3.49 (dd, *J* = 11.4, 1.4 Hz, 1H), 3.39 (dd, *J* = 10.6, 3.1 Hz, 1H), 3.24 (t, *J* = 11.4 Hz, 1H), 3.13 (d, *J* = 11.5 Hz, 1H), 2.44 (td, *J* = 11.0, 4.7 Hz, 1H), 1.74 (s, 3H), 1.63 (d, *J* = 3.2 Hz, 1H), 1.05 (s, 3H), 0.95 (s, 3H).

**<sup>13</sup>C NMR:** (101 MHz, CDCl<sub>3</sub>) δ 142.35, 114.40, 77.92, 76.05, 71.14, 48.34, 35.86, 23.55, 20.52, 17.49.

**HR-MS:** (APCI) calcd. for C<sub>8</sub>H<sub>14</sub>O<sub>2</sub> 143.1067 [M + H<sup>+</sup>], found 143.1068

[α]<sub>D</sub><sup>22</sup> = +7.6° (c = 0.5, CH<sub>2</sub>Cl<sub>2</sub>)

#### (3*S*,4*R*)-3-(prop-1-en-2-yl)tetrahydro-2*H*-pyran-4-ol (**2l-cis**)

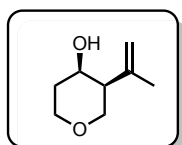

Synthesized from **1l** according to general procedure D for volatile substrates on 0.1 mmol scale using 5 mol% of catalyst **9**. 24 h reaction time. 23% yield of the cis diastereomer by <sup>1</sup>H NMR. Yield assessed from crude reaction mixture using mesitylene as an internal quantitative standard. Absolute configuration unknown.

**<sup>1</sup>H NMR:** (400 MHz, CDCl<sub>3</sub>) δ 5.00 (s, 1H), 4.64 (s, 1H), 4.11 (s, 1H), 3.75 (m, 4H), 2.38 (m, 1H), 1.86 (m, 2H), 1.80 (s, 3H), 1.65 (s, 1H).

**<sup>13</sup>C NMR:** (101 MHz, CDCl<sub>3</sub>) δ 143.81, 112.22, 65.01, 63.33, 62.37, 47.08, 32.13, 22.89.

**HR-MS:** (APCI) calcd. for C<sub>8</sub>H<sub>14</sub>O<sub>2</sub> 143.1067 [M + H<sup>+</sup>], found 143.1068

#### (4*R*,5*S*)-3,3-dimethyl-5-(prop-1-en-2-yl)tetrahydro-2*H*-pyran-4-ol (**2m**)

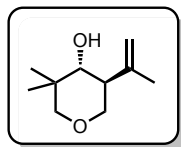

Synthesized from **1m** according to general procedure C on 0.3 mmol scale using 5 mol% of catalyst **9**. 24 h reaction time. Isolated as an inseparable mixture of diastereomers in 84% combined yield (0.043 g, white solid), d.r. = 8 : 1 (crude material), d.r. = 8 : 1 (purified material).

**<sup>1</sup>H NMR:** (400 MHz, CDCl<sub>3</sub>) δ 5.00 (s, 1H), 4.92 (s, 1H), 3.87 (ddd, *J* = 11.4, 4.8, 1.4 Hz, 1H), 3.49 (dd, *J* = 11.4, 1.4 Hz, 1H), 3.39 (dd, *J* = 10.6, 3.1 Hz, 1H), 3.24 (t, *J* = 11.4 Hz, 1H), 3.13 (d, *J* = 11.5 Hz, 1H), 2.44 (td, *J* = 11.0, 4.7 Hz, 1H), 1.74 (s, 3H), 1.63 (d, *J* = 3.2 Hz, 1H), 1.05 (s, 3H), 0.95 (s, 3H).

**<sup>13</sup>C NMR:** (101 MHz, CDCl<sub>3</sub>) δ 142.35, 114.40, 77.92, 76.05, 71.14, 48.34, 35.86, 23.55, 20.52, 17.49.

**HR-MS:** (APCI) calcd. for C<sub>10</sub>H<sub>18</sub>O<sub>2</sub> 171.1380 [M + H<sup>+</sup>], found 171.1381

[α]<sub>D</sub><sup>22</sup> = +28.6° (c = 1.0, CH<sub>2</sub>Cl<sub>2</sub>)

#### benzyl (4*R*,5*S*)-4-hydroxy-3,3-dimethyl-5-(prop-1-en-2-yl)piperidine-1-carboxylate (**2n**)

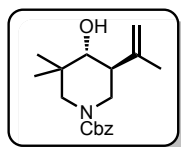

Synthesized from **1n** according to general procedure C on 0.3 mmol scale using 5 mol% of catalyst **9**. 1 h reaction time. Isolated as an inseparable mixture of diastereomers in 78% combined yield (0.071 g, light yellow oil), d.r. = 8 : 1 (crude material), d.r. = 8 : 1 (purified material).

**<sup>1</sup>H NMR:** (400 MHz, CDCl<sub>3</sub>) δ 7.37 (m, 5H), 5.14 (m, 2H), 5.02 (s, 1H), 4.93 (s, 1H), 4.25 (d, *J* = 13.6 Hz, 1H), 3.89 (d, *J* = 13.4 Hz, 1H), 3.30 (dd, *J* = 10.6, 2.9 Hz, 1H), 2.60 (m, 2H), 2.31 (m, 1H), 1.76 (s, 3H), 1.66 (s, 1H), 1.04 (s, 3H), 0.91 (s, 3H).

**<sup>13</sup>C NMR:** (101 MHz, CDCl<sub>3</sub>) δ 155.44, 142.94, 136.77, 128.47, 127.98, 127.84, 114.72, 76.50, 67.16, 54.65, 47.32, 41.10, 35.79, 25.14, 19.99, 17.05.

**HR-MS:** (APCI) calcd. for C<sub>18</sub>H<sub>25</sub>NO<sub>3</sub> 304.1907 [M + H<sup>+</sup>], found 304.1908

[α]<sub>D</sub><sup>22</sup> = +12.6° (c = 1.0, CH<sub>2</sub>Cl<sub>2</sub>)

#### (8*S*,9*R*)-8-(prop-1-en-2-yl)-6-oxaspiro[3.5]nonan-9-ol (**2o**)

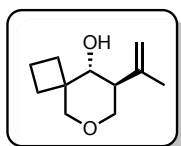

Synthesized from **1o** according to general procedure C on 0.3 mmol scale using 5 mol% of catalyst **9**. 24 h reaction time, d.r. = 3 : 1 (crude material). The diastereomers of **2o** were found to be separable by conventional silica gel chromatography. The data below correspond to the major trans diastereomer, isolated in 53% yield (0.029 g, white solid).

**<sup>1</sup>H NMR:** (400 MHz, CDCl<sub>3</sub>) δ 5.00 (s, 1H), 4.91 (s, 1H), 3.98 (d, *J* = 11.5 Hz, 1H), 3.79 (ddd, *J* = 11.3, 4.5, 1.4 Hz, 1H), 3.38 (dd, *J* = 10.4, 3.0 Hz, 1H), 3.24 (ddd, *J* = 11.2, 6.4, 4.6 Hz, 2H), 2.26 (m, 2H), 2.17 (td, *J* = 10.8, 4.5 Hz, 1H), 1.86 (m, 4H), 1.74 (s, 3H), 1.41 (m, 1H).

**<sup>13</sup>C NMR:** (101 MHz, CDCl<sub>3</sub>) δ 142.11, 114.35, 75.29, 73.23, 70.54, 48.96, 43.13, 23.81, 23.08, 20.62, 15.33.

**HR-MS:** (APCI) calcd. for C<sub>11</sub>H<sub>18</sub>O<sub>2</sub> 183.1380 [M + H<sup>+</sup>], found 183.1382

[α]<sub>D</sub><sup>22</sup> = +37.8° (c = 1.0, CH<sub>2</sub>Cl<sub>2</sub>)

#### (8*S*,9*S*)-8-(prop-1-en-2-yl)-6-oxaspiro[3.5]nonan-9-ol (**2o-cis**)

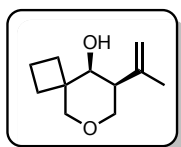

Synthesized from **1o** according to general procedure C on 0.3 mmol scale using 5 mol% of catalyst **9**. 24 h reaction time. The diastereomers of **2o** were found to be separable by conventional silica gel chromatography. The data below correspond to the minor cis diastereomer, isolated in 20% yield (0.011 g, white solid). Absolute configuration unknown.

**<sup>1</sup>H NMR:** (400 MHz, CDCl<sub>3</sub>) δ 4.98 (s, 1H), 4.62 (s, 1H), 3.85 (s, 1H), 3.65 (m, 4H), 2.32 (dd, *J* = 11.2, 4.8 Hz, 1H), 2.06 (tdd, *J* = 8.7, 4.8, 2.1 Hz, 1H), 1.94 (m, 4H), 1.80 (s, 3H), 1.62 (m, 1H).

$^{13}\text{C}$  NMR: (101 MHz,  $\text{CDCl}_3$ )  $\delta$  143.61, 112.11, 71.36, 69.78, 64.34, 43.19, 41.62, 29.16, 26.39, 22.70, 15.18.

HR-MS: (APCI) calcd. for  $\text{C}_{11}\text{H}_{18}\text{O}_2$  183.1380  $[\text{M} + \text{H}^+]$ , found 183.1383

### (3*S*,4*R*)-8-fluoro-3-methyl-3-(prop-1-en-2-yl)chroman-4-ol (2p)

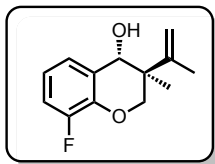

Synthesized from **1p** according to general procedure C on 0.3 mmol scale using 5 mol% of catalyst **9**. 2 h reaction time. 94% yield (0.063 g, white solid), d.r. > 50 : 1 (crude material), d.r. > 50 : 1 (purified material).

$^1\text{H}$  NMR: (400 MHz,  $\text{CDCl}_3$ )  $\delta$  7.15 (dd,  $J = 7.8, 1.7$  Hz, 1H), 7.00 (ddd,  $J = 11.0, 8.1, 1.6$  Hz, 1H), 6.86 (td,  $J = 7.9, 4.8$  Hz, 1H), 4.95 (m, 2H), 4.85 (d,  $J = 4.2$  Hz, 1H), 4.22 (d,  $J = 11.3$  Hz, 1H), 4.14 (d,  $J = 11.2$  Hz, 1H), 1.82 (m, 4H), 1.18 (s, 3H).

$^{13}\text{C}$  NMR: (101 MHz,  $\text{CDCl}_3$ )  $\delta$  151.00 (d,  $J = 245.0$  Hz), 145.31, 141.82 (d,  $J = 11.1$  Hz), 126.60 (d,  $J = 1.7$  Hz), 123.79 (d,  $J = 3.6$  Hz), 120.17 (d,  $J = 7.0$  Hz), 115.57 (d,  $J = 17.8$  Hz), 113.09, 69.88, 68.78 (d,  $J = 2.9$  Hz), 41.45, 19.71, 16.67.

$^{19}\text{F}$  NMR: (376 MHz,  $\text{CDCl}_3$ )  $\delta$  -137.93 (s, 1F)

HR-MS: (APCI) calcd. for  $\text{C}_{13}\text{H}_{15}\text{FO}_2$  223.1129  $[\text{M} + \text{H}^+]$ , found 223.1131

$[\alpha]_D^{22} = +58.2^\circ$  (c = 1.0,  $\text{CH}_2\text{Cl}_2$ )

### (3*S*,4*S*)-3-methyl-3-(prop-1-en-2-yl)tetrahydro-2*H*-pyran-4-ol (2q)

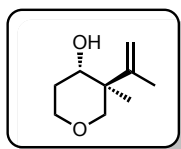

Synthesized from **1q** according to general procedure C on 0.3 mmol scale using 5 mol% of catalyst **9** with the following modification: 15 mol% AcCl and 15 mol% EtOH were used. 24 h reaction time. Isolated as an inseparable mixture of diastereomers in 65% combined yield (0.031 g, clear colorless oil), d.r. = 5 : 1 (crude material), d.r. = 5 : 1 (purified material).

$^1\text{H}$  NMR: (400 MHz,  $\text{CDCl}_3$ )  $\delta$  5.05 (s, 1H), 5.01 (s, 1H), 4.02 (m, 1H), 3.92 (m, 1H), 3.54 (dd,  $J = 11.4, 1.2$  Hz, 1H), 3.47 (dq,  $J = 11.4, 3.7$  Hz, 1H), 3.38 (d,  $J = 11.4$  Hz, 1H), 1.79 (m, 5H), 1.62 (s, 1H), 1.17 (s, 3H).

$^{13}\text{C}$  NMR: (101 MHz,  $\text{CDCl}_3$ )  $\delta$  147.21, 113.49, 73.95, 70.06, 66.68, 45.24, 29.76, 19.93, 14.66.

HR-MS: (APCI) calcd. for  $\text{C}_9\text{H}_{16}\text{O}_2$  157.1223  $[\text{M} + \text{H}^+]$ , found 157.1225

$[\alpha]_D^{22} = -15.6^\circ$  (c = 1.0,  $\text{CH}_2\text{Cl}_2$ )

### (3*S*,4*R*)-4-(prop-1-en-2-yl)-3,4,5,6-tetrahydro-[1,1'-biphenyl]-3-ol (2r)

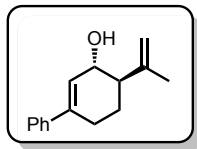

Synthesized from **1r** according to general procedure C on 0.3 mmol scale using 10 mol% of catalyst **9**. 24 h reaction time. 49% yield (0.031 g, light yellow oil), d.r. = 9 : 1 (crude material), d.r. = 9 : 1 (purified material).

$^1\text{H}$  NMR: (400 MHz,  $\text{CDCl}_3$ )  $\delta$  7.43 (m, 2H), 7.33 (m, 2H), 7.28 (m, 1H), 6.13 (dt,  $J = 2.3, 1.3$  Hz, 1H), 4.96 (s, 1H), 4.93 (s, 1H), 4.34 (dt,  $J = 9.5, 3.0$  Hz, 1H), 2.54 (m, 2H), 2.24 (ddd,  $J = 12.3, 9.1, 2.9$  Hz, 1H), 1.91 (m, 2H), 1.77 (m, 4H).

$^{13}\text{C}$  NMR: (101 MHz,  $\text{CDCl}_3$ )  $\delta$  146.16, 140.82, 138.37, 128.29, 127.37, 126.62, 125.33, 112.65, 69.20, 50.65, 27.60, 26.39, 19.33.

HR-MS: (APCI) calcd. for  $\text{C}_{15}\text{H}_{18}\text{O}$  215.1430  $[\text{M} + \text{H}^+]$ , found 215.1432

$[\alpha]_D^{22} = -16.2^\circ$  (c = 1.0,  $\text{CH}_2\text{Cl}_2$ )

### (3*S*,4*R*)-4'-chloro-4-(prop-1-en-2-yl)-3,4,5,6-tetrahydro-[1,1'-biphenyl]-3-ol (2s)

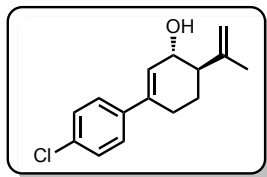

Synthesized from **1s** according to general procedure C on 0.3 mmol scale using 5 mol% of catalyst **9**. 3 h reaction time. 64% yield (0.048 g, light yellow oil), d.r. = 13 : 1 (crude material), d.r. = 13 : 1 (purified material).

**<sup>1</sup>H NMR:** (400 MHz, CDCl<sub>3</sub>) δ 7.36 (m, 2H), 7.30 (m, 2H), 6.12 (s, 1H), 4.96 (s, 1H), 4.92 (s, 1H), 4.32 (m, 1H), 2.49 (m, 2H), 2.23 (ddd, *J* = 12.3, 9.1, 2.9 Hz, 1H), 1.92 (m, 3H), 1.79 (s, 3H).

**<sup>13</sup>C NMR:** (101 MHz, CDCl<sub>3</sub>) δ 145.95, 139.22, 137.24, 133.12, 128.41, 127.15, 126.59, 112.80, 69.08, 50.53, 27.53, 26.26, 19.28.

**HR-MS:** (APCI) calcd. for C<sub>15</sub>H<sub>17</sub>ClO 249.0866 [M + H<sup>+</sup>], found 249.0685

$[\alpha]_D^{22} = -7.0^\circ$  (c = 1.0, CH<sub>2</sub>Cl<sub>2</sub>)

### (3S,4R)-3'-fluoro-4-(prop-1-en-2-yl)-3,4,5,6-tetrahydro-[1,1'-biphenyl]-3-ol (**2t**)

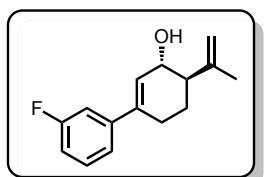

Synthesized from **1t** according to general procedure C on 0.3 mmol scale using 5 mol% of catalyst **9**. 2 h reaction time. 66% yield (0.046 g, light yellow oil), d.r. = 18 : 1 (crude material), d.r. = 20 : 1 (purified material).

**<sup>1</sup>H NMR:** (400 MHz, CDCl<sub>3</sub>) δ 7.29 (td, *J* = 8.0, 6.0 Hz, 1H), 7.21 (dt, *J* = 7.8, 1.3 Hz, 1H), 7.11 (dt, *J* = 10.7, 2.2 Hz, 1H), 6.96 (td, *J* = 8.2, 2.5 Hz, 1H), 6.16 (s, 1H), 4.96 (s, 1H), 4.92 (s, 1H), 4.33 (dt, *J* = 9.4, 3.0 Hz, 1H), 2.49 (m, 2H), 2.23 (ddd, *J* = 12.3, 9.2, 2.9 Hz, 1H), 1.93 (m, 2H), 1.79 (s, 3H), 1.76 (m, 1H).

**<sup>13</sup>C NMR:** (101 MHz, CDCl<sub>3</sub>) δ 162.91 (d, *J* = 244.9 Hz), 145.94, 143.15 (d, *J* = 7.5 Hz), 137.25 (d, *J* = 2.3 Hz), 129.67 (d, *J* = 8.4 Hz), 127.70, 120.92 (d, *J* = 2.8 Hz), 114.10 (d, *J* = 21.4 Hz), 112.81, 112.27 (d, *J* = 22.0 Hz), 69.06, 50.53, 27.51, 26.25, 19.29.

**<sup>19</sup>F NMR:** (376 MHz, CDCl<sub>3</sub>) δ -114.53 (s, 1F)

**HR-MS:** (APCI) calcd. for C<sub>15</sub>H<sub>17</sub>FO 231.1191 [M + H<sup>+</sup>], found 231.1186

$[\alpha]_D^{22} = +5.0^\circ$  (c = 1.0, CH<sub>2</sub>Cl<sub>2</sub>)

## 5.2 GC and HPLC traces of enantioenriched products

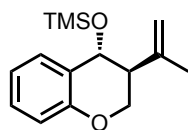

GC (CP-Chirasil Dex CB, 25 m)  
125 °C - 145 °C, 0.5 °C/min, 7 psi

**2a, 96% ee**  
(ee evaluated using  
OTMS derivative)

*racemic sample*

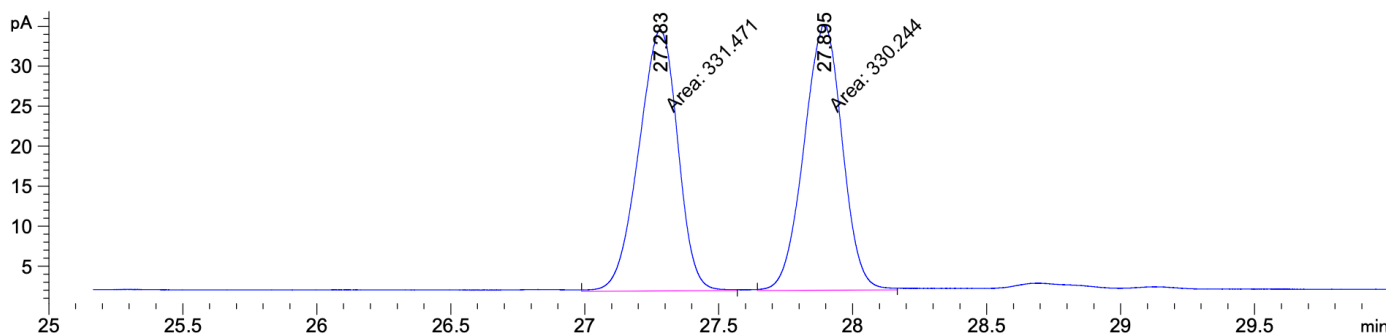

| Peak # | RetTime [min] | Type | Width [min] | Area [pA*s] | Height [pA] | Area %   |
|--------|---------------|------|-------------|-------------|-------------|----------|
| 1      | 27.283        | MM   | 0.1689      | 331.47098   | 32.71778    | 50.09274 |
| 2      | 27.895        | MM   | 0.1657      | 330.24359   | 33.21354    | 49.90726 |

*enantioenriched sample*

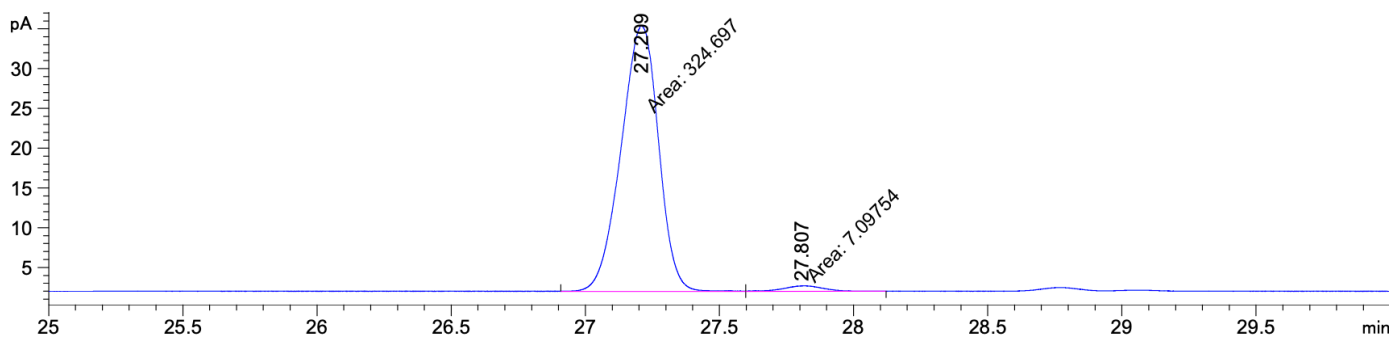

| Peak # | RetTime [min] | Type | Width [min] | Area [pA*s] | Height [pA] | Area %   |
|--------|---------------|------|-------------|-------------|-------------|----------|
| 1      | 27.209        | MF   | 0.1618      | 324.69724   | 33.45393    | 97.86086 |
| 2      | 27.807        | FM   | 0.1697      | 7.09754     | 6.97255e-1  | 2.13914  |

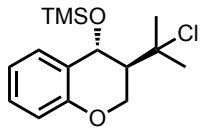

GC (CP-Chirasil Dex CB, 25 m)  
125 °C - 145 °C, 0.5 °C/min, 7 psi

**3a, 98% ee**  
(ee evaluated using  
OTMS derivative)

*racemic sample*

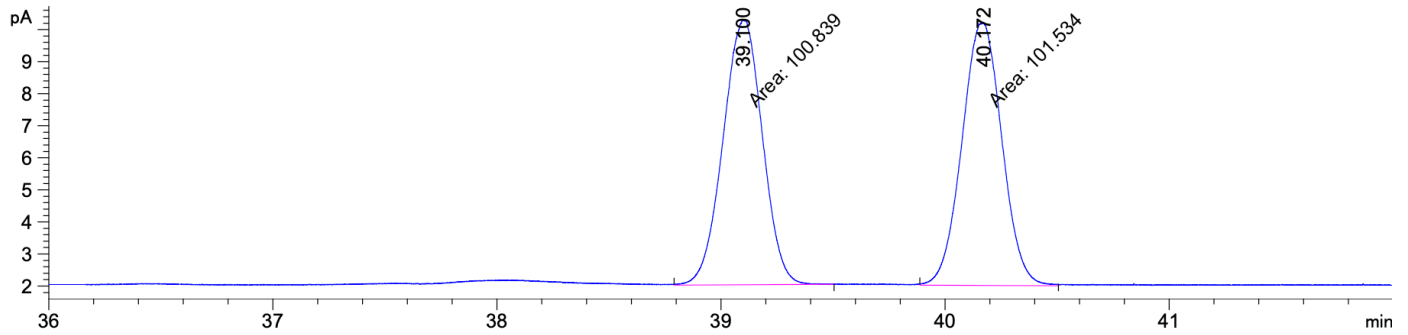

| Peak # | RetTime [min] | Type | Width [min] | Area [pA*s] | Height [pA] | Area %   |
|--------|---------------|------|-------------|-------------|-------------|----------|
| 1      | 39.100        | MM   | 0.2032      | 100.83939   | 8.26988     | 49.82839 |
| 2      | 40.172        | MM   | 0.2062      | 101.53397   | 8.20612     | 50.17161 |

*enantioenriched sample*

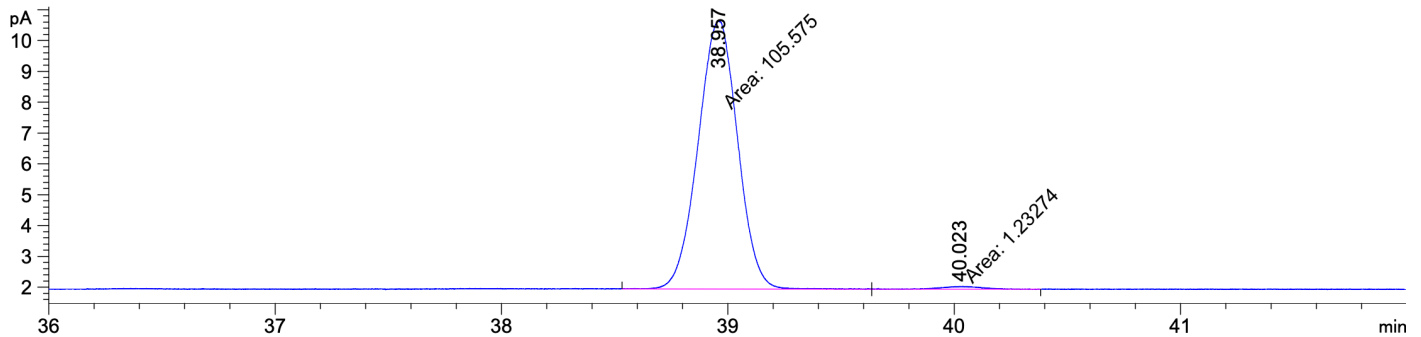

| Peak # | RetTime [min] | Type | Width [min] | Area [pA*s] | Height [pA] | Area %   |
|--------|---------------|------|-------------|-------------|-------------|----------|
| 1      | 38.957        | MF   | 0.2020      | 105.57536   | 8.71163     | 98.84583 |
| 2      | 40.023        | FM   | 0.2233      | 1.23274     | 9.20271e-2  | 1.15417  |



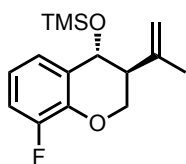

GC (CP-Chirasil Dex CB, 25 m)  
125 °C - 145 °C, 0.5 °C/min, 7 psi

**2b, 98% ee**  
(ee evaluated using OTMS derivative)

*racemic sample*

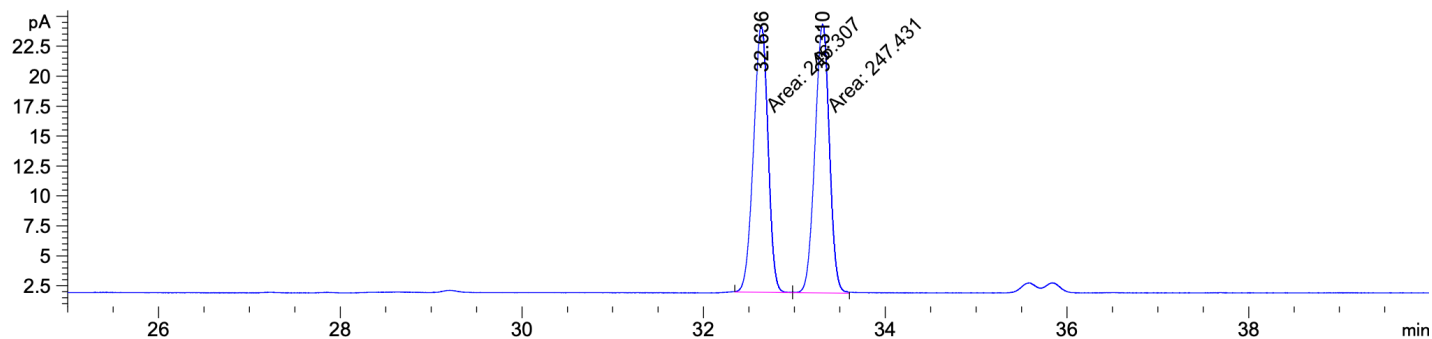

| Peak # | RetTime [min] | Type | Width [min] | Area [pA*s] | Height [pA] | Area %   |
|--------|---------------|------|-------------|-------------|-------------|----------|
| 1      | 32.636        | MF   | 0.1841      | 246.30708   | 22.30269    | 49.88619 |
| 2      | 33.310        | FM   | 0.1839      | 247.43092   | 22.42530    | 50.11381 |

*enantioenriched sample*

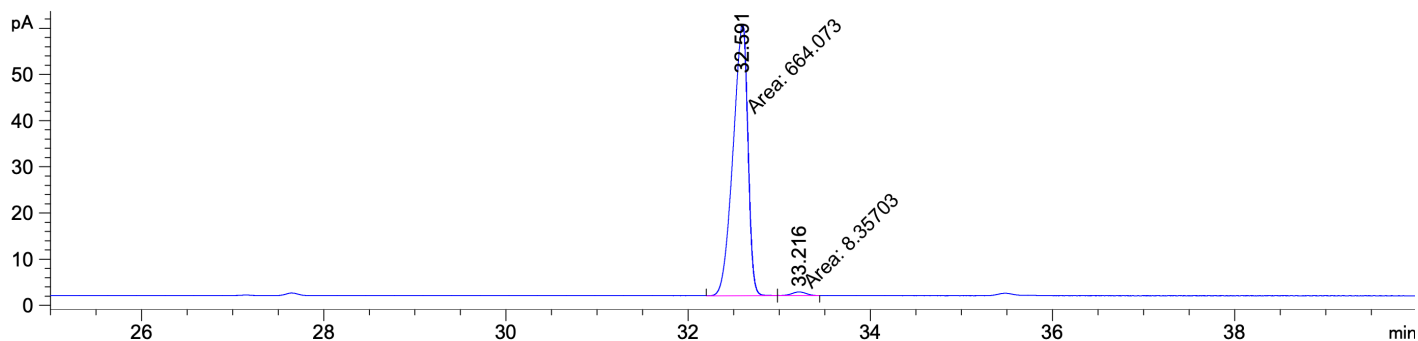

| Peak # | RetTime [min] | Type | Width [min] | Area [pA*s] | Height [pA] | Area %   |
|--------|---------------|------|-------------|-------------|-------------|----------|
| 1      | 32.591        | MM   | 0.1886      | 664.07269   | 58.67761    | 98.75719 |
| 2      | 33.216        | MM   | 0.1748      | 8.35703     | 7.96933e-1  | 1.24281  |

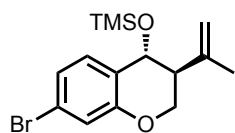

**2c, 96% ee**  
(ee evaluated using  
OTMS derivative)

GC (CP-Chirasil Dex CB, 25 m)  
120 °C - 180 °C, 0.5 °C/min, 7 psi

*racemic sample*

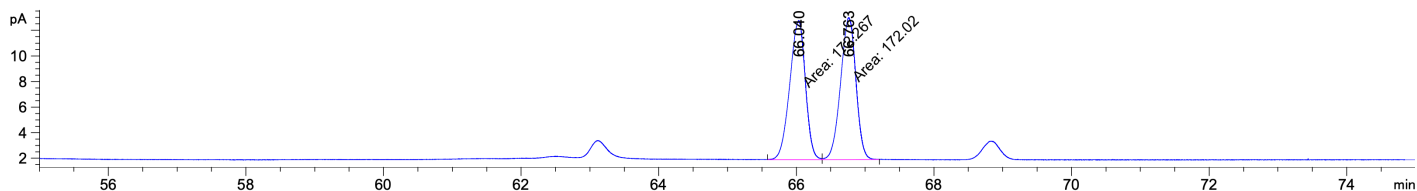

| Peak # | RetTime [min] | Type | Width [min] | Area [pA*s] | Height [pA] | Area %   |
|--------|---------------|------|-------------|-------------|-------------|----------|
| 1      | 66.040        | MF   | 0.2640      | 172.26672   | 10.87363    | 50.03589 |
| 2      | 66.763        | FM   | 0.2578      | 172.01961   | 11.12067    | 49.96411 |

*enantioenriched sample*

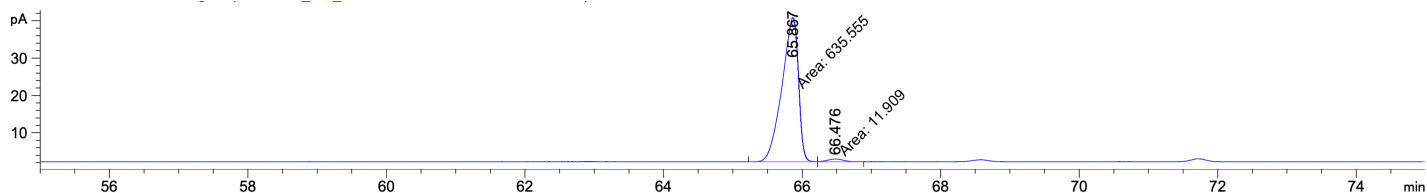

| Peak # | RetTime [min] | Type | Width [min] | Area [pA*s] | Height [pA] | Area %   |
|--------|---------------|------|-------------|-------------|-------------|----------|
| 1      | 65.867        | MF   | 0.2746      | 635.55548   | 38.57752    | 98.16067 |
| 2      | 66.476        | FM   | 0.2644      | 11.90901    | 7.50578e-1  | 1.83933  |

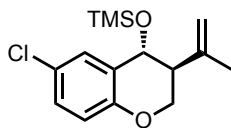

GC (CP-Chirasil Dex CB, 25 m)  
120 °C - 170 °C, 0.5 °C/min, 7 psi

**2d, 96% ee**  
(ee evaluated using  
OTMS derivative)

*racemic sample*

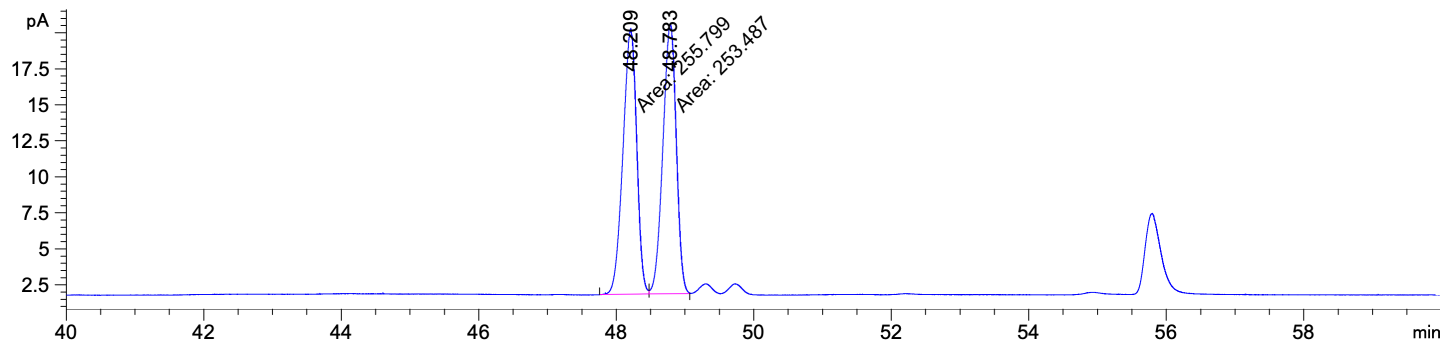

| Peak # | RetTime [min] | Type | Width [min] | Area [pA*s] | Height [pA] | Area %   |
|--------|---------------|------|-------------|-------------|-------------|----------|
| 1      | 48.209        | MF   | 0.2311      | 255.79863   | 18.45101    | 50.22697 |
| 2      | 48.783        | FM   | 0.2254      | 253.48680   | 18.74529    | 49.77303 |

*enantioenriched sample*

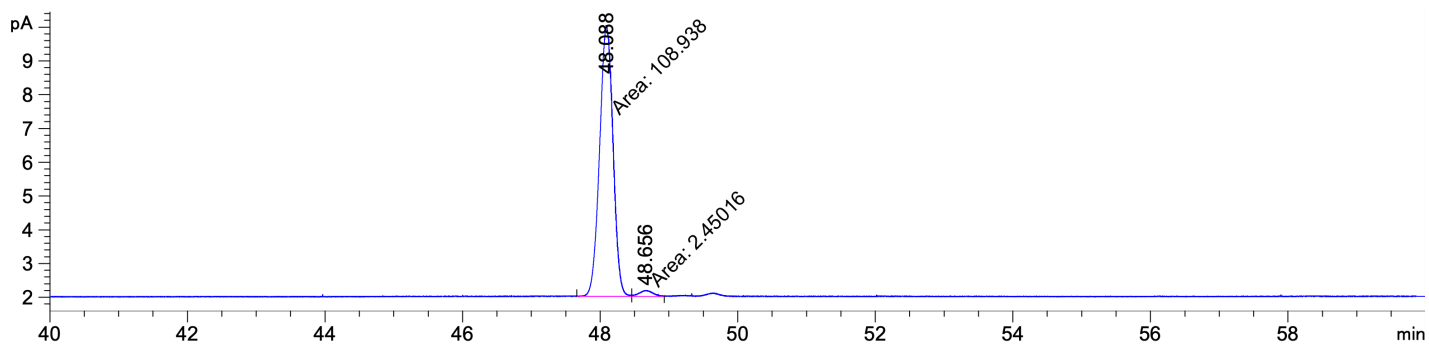

| Peak # | RetTime [min] | Type | Width [min] | Area [pA*s] | Height [pA] | Area %   |
|--------|---------------|------|-------------|-------------|-------------|----------|
| 1      | 48.088        | MF   | 0.2262      | 108.93795   | 8.02712     | 97.80034 |
| 2      | 48.656        | FM   | 0.2281      | 2.45016     | 1.79046e-1  | 2.19966  |

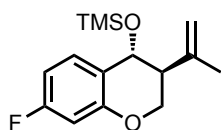

GC (CP-Chirasil Dex CB, 25 m)  
120 °C - 145 °C, 0.5 °C/min, 7 psi

**2e, 95% ee**  
(ee evaluated using  
OTMS derivative)

*racemic sample*

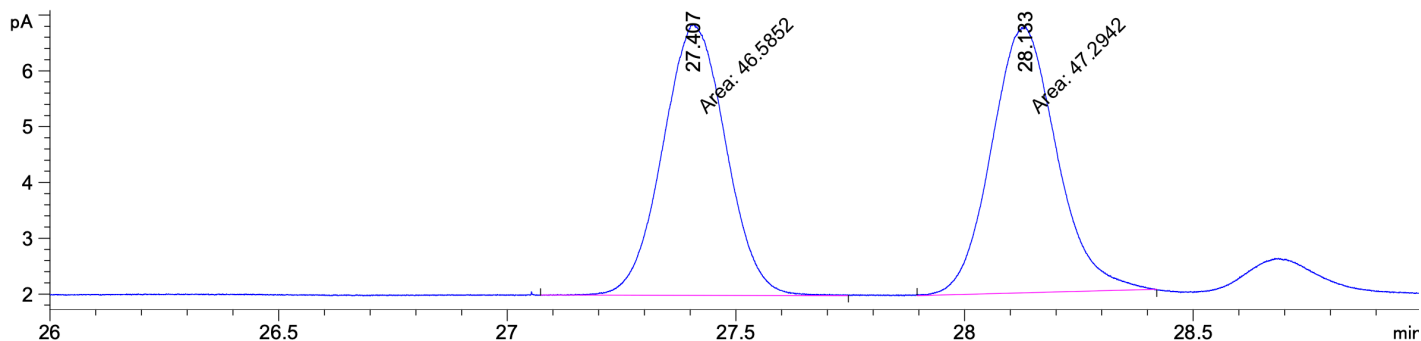

| Peak # | RetTime [min] | Type | Width [min] | Area [pA*s] | Height [pA] | Area %   |
|--------|---------------|------|-------------|-------------|-------------|----------|
| 1      | 27.407        | MM   | 0.1595      | 46.58520    | 4.86742     | 49.62240 |
| 2      | 28.133        | MM   | 0.1651      | 47.29418    | 4.77371     | 50.37760 |

*enantiomeriched sample*

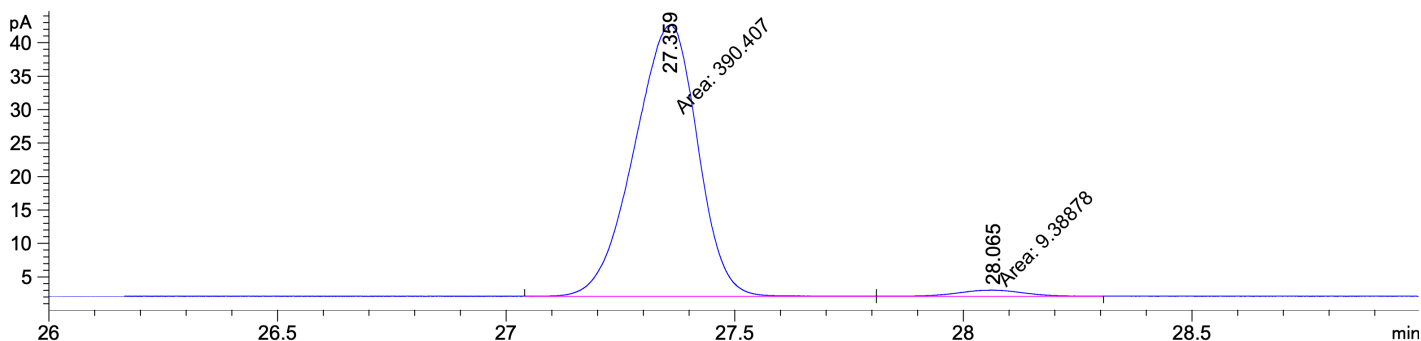

| Peak # | RetTime [min] | Type | Width [min] | Area [pA*s] | Height [pA] | Area %   |
|--------|---------------|------|-------------|-------------|-------------|----------|
| 1      | 27.359        | MF   | 0.1603      | 390.40741   | 40.58126    | 97.65161 |
| 2      | 28.065        | FM   | 0.1682      | 9.38878     | 9.30305e-1  | 2.34839  |

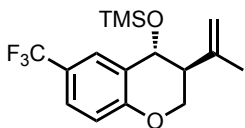

GC (CP-Chirasil Dex CB, 25 m)  
120 °C - 145 °C, 0.5 °C/min, 7 psi

**2f, 96% ee**  
(ee evaluated using  
OTMS derivative)

*racemic sample*

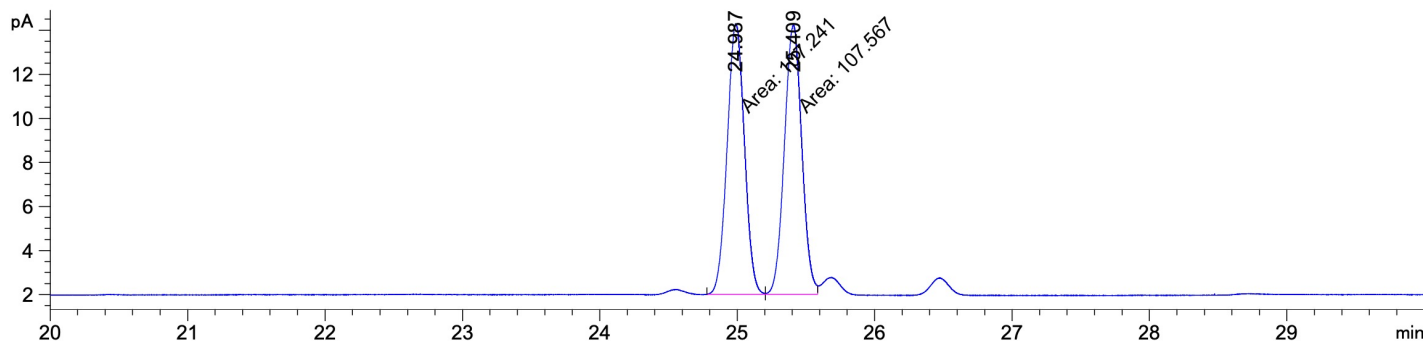

| Peak # | RetTime [min] | Type | Width [min] | Area [pA*s] | Height [pA] | Area %   |
|--------|---------------|------|-------------|-------------|-------------|----------|
| 1      | 24.987        | MF   | 0.1457      | 107.24072   | 12.26632    | 49.92395 |
| 2      | 25.409        | FM   | 0.1469      | 107.56744   | 12.20798    | 50.07605 |

*enantioenriched sample*

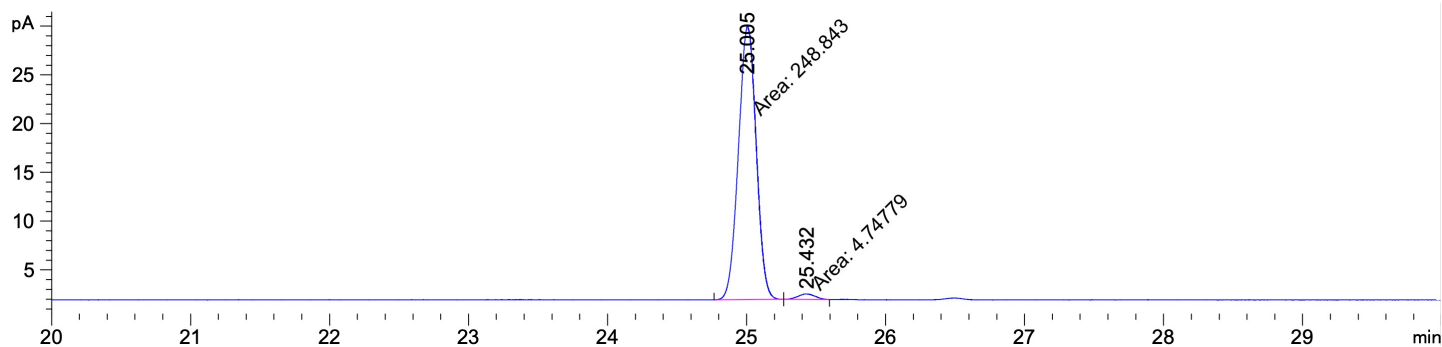

| Peak # | RetTime [min] | Type | Width [min] | Area [pA*s] | Height [pA] | Area %   |
|--------|---------------|------|-------------|-------------|-------------|----------|
| 1      | 25.005        | MM   | 0.1476      | 248.84320   | 28.09731    | 98.12778 |
| 2      | 25.432        | MM   | 0.1422      | 4.74779     | 5.56521e-1  | 1.87222  |

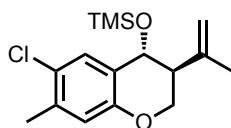

**2g, 96% ee**  
(ee evaluated using  
OTMS derivative)

GC (CP-Chirasil Dex CB, 25 m)  
120 °C - 180 °C, 0.5 °C/min, 7 psi

*racemic sample*

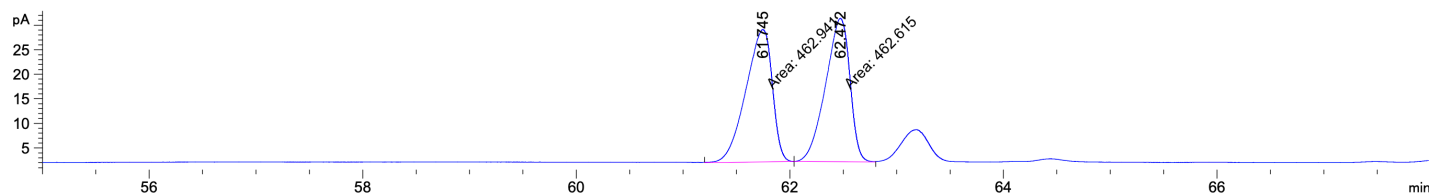

| Peak # | RetTime [min] | Type | Width [min] | Area [pA*s] | Height [pA] | Area %   |
|--------|---------------|------|-------------|-------------|-------------|----------|
| 1      | 61.745        | MM   | 0.2860      | 462.94058   | 26.97376    | 50.01761 |
| 2      | 62.472        | MM   | 0.2638      | 462.61469   | 29.22861    | 49.98239 |

*enantioenriched sample*

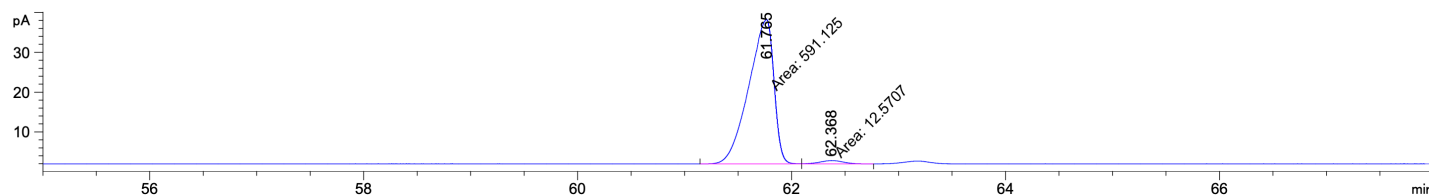

| Peak # | RetTime [min] | Type | Width [min] | Area [pA*s] | Height [pA] | Area %   |
|--------|---------------|------|-------------|-------------|-------------|----------|
| 1      | 61.765        | MF   | 0.2709      | 591.12482   | 36.36334    | 97.91770 |
| 2      | 62.368        | FM   | 0.2513      | 12.57074    | 8.33590e-1  | 2.08230  |

HPLC (AS-H)  
10% IPA/Hexanes, 1 mL/min, 254 nm

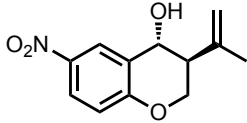

2h, 97% ee

*racemic sample*

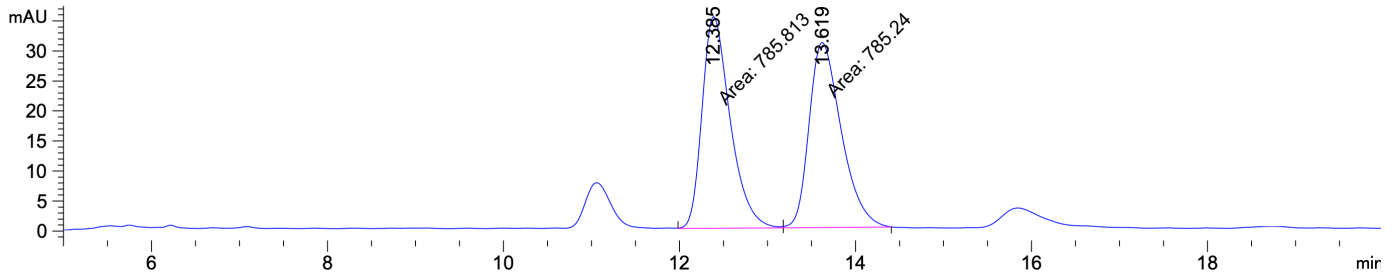

| Peak # | RetTime [min] | Type | Width [min] | Area [mAU*s] | Height [mAU] | Area %  |
|--------|---------------|------|-------------|--------------|--------------|---------|
| 1      | 12.385        | MF   | 0.3711      | 785.81342    | 35.28750     | 50.0183 |
| 2      | 13.619        | FM   | 0.4242      | 785.23993    | 30.85104     | 49.9817 |

*enantioenriched sample*

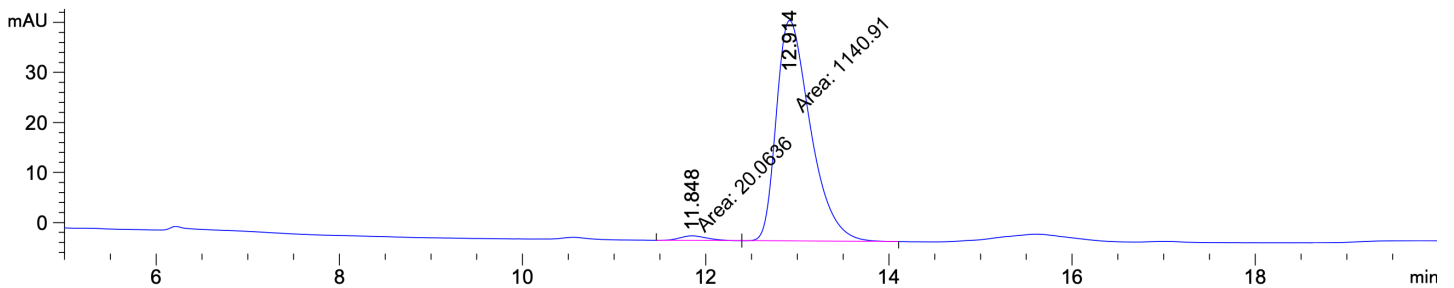

| Peak # | RetTime [min] | Type | Width [min] | Area [mAU*s] | Height [mAU] | Area %  |
|--------|---------------|------|-------------|--------------|--------------|---------|
| 1      | 11.848        | MF   | 0.3538      | 20.06356     | 9.45258e-1   | 1.7282  |
| 2      | 12.914        | FM   | 0.4311      | 1140.90942   | 44.10820     | 98.2718 |

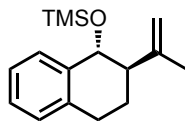

GC (CP-Chirasil Dex CB, 25 m)  
120 °C - 145 °C, 0.5 °C/min, 7 psi

**2i, 81% ee**  
(ee evaluated using  
OTMS derivative)

*racemic sample*

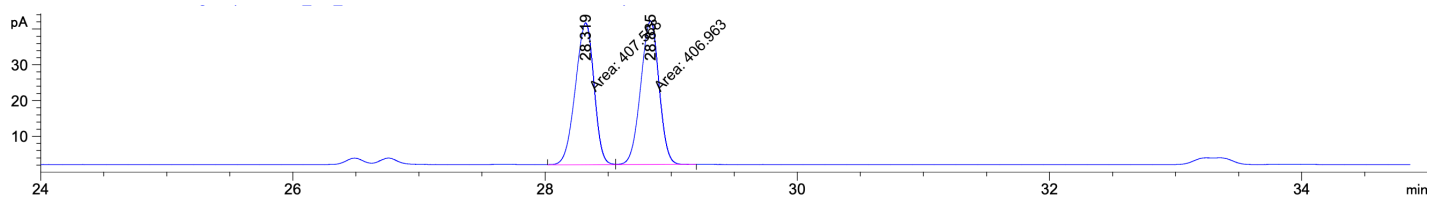

| Peak # | RetTime [min] | Type | Width [min] | Area [pA*s] | Height [pA] | Area %   |
|--------|---------------|------|-------------|-------------|-------------|----------|
| 1      | 28.319        | MF   | 0.1710      | 407.56750   | 39.71247    | 50.03708 |
| 2      | 28.835        | FM   | 0.1689      | 406.96338   | 40.15838    | 49.96292 |

*enantioenriched sample*

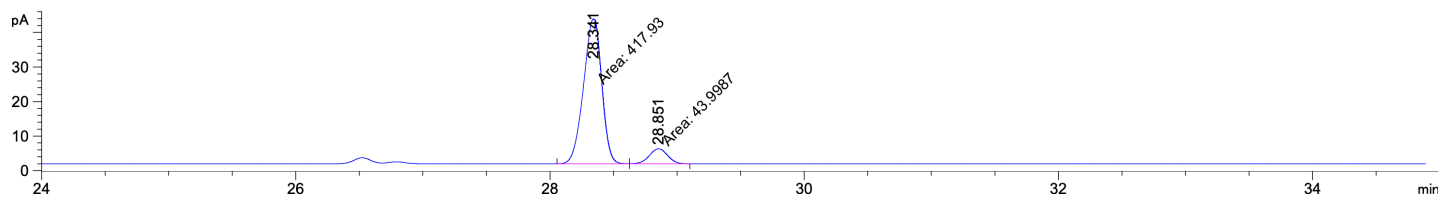

| Peak # | RetTime [min] | Type | Width [min] | Area [pA*s] | Height [pA] | Area %   |
|--------|---------------|------|-------------|-------------|-------------|----------|
| 1      | 28.341        | MF   | 0.1657      | 417.92990   | 42.04565    | 90.47499 |
| 2      | 28.851        | FM   | 0.1683      | 43.99873    | 4.35766     | 9.52501  |



GC (CP-Chirasil Dex CB, 25 m)  
120 °C - 135 °C, 0.2 °C/min, 7 psi

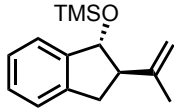

**2j, 80% ee**  
(ee evaluated using  
OTMS derivative)

*racemic sample*

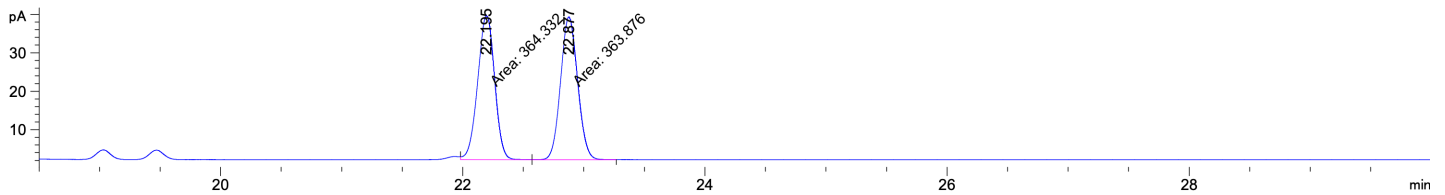

| Peak # | RetTime [min] | Type | Width [min] | Area [pA*s] | Height [pA] | Area %   |
|--------|---------------|------|-------------|-------------|-------------|----------|
| 1      | 22.195        | FM   | 0.1616      | 364.33215   | 37.58689    | 50.03134 |
| 2      | 22.877        | FM   | 0.1631      | 363.87570   | 37.17232    | 49.96866 |

*enantioenriched sample*

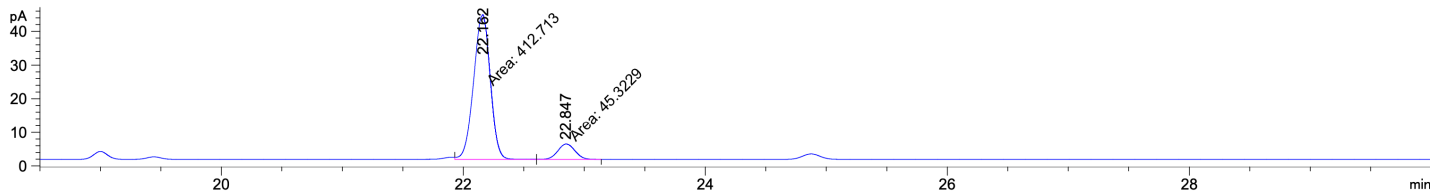

| Peak # | RetTime [min] | Type | Width [min] | Area [pA*s] | Height [pA] | Area %   |
|--------|---------------|------|-------------|-------------|-------------|----------|
| 1      | 22.162        | FM   | 0.1598      | 412.71304   | 43.03346    | 90.10495 |
| 2      | 22.847        | FM   | 0.1646      | 45.32290    | 4.58843     | 9.89505  |

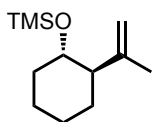

GC (Cyclosil-B, 30 m)  
70 °C - 100 °C, 0.5 °C/min, 7 psi

**2k, 89% ee**  
(ee evaluated using  
OTMS derivative)

*racemic sample*

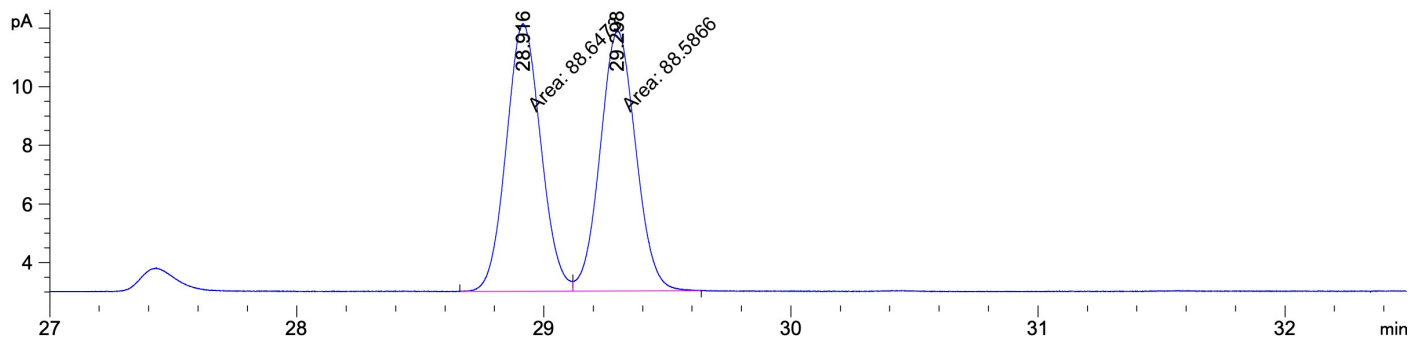

| Peak # | RetTime [min] | Type | Width [min] | Area [pA*s] | Height [pA] | Area %   |
|--------|---------------|------|-------------|-------------|-------------|----------|
| 1      | 28.916        | MF   | 0.1619      | 88.64730    | 9.12300     | 50.01713 |
| 2      | 29.298        | FM   | 0.1665      | 88.58659    | 8.86935     | 49.98287 |

*enantioenriched sample*

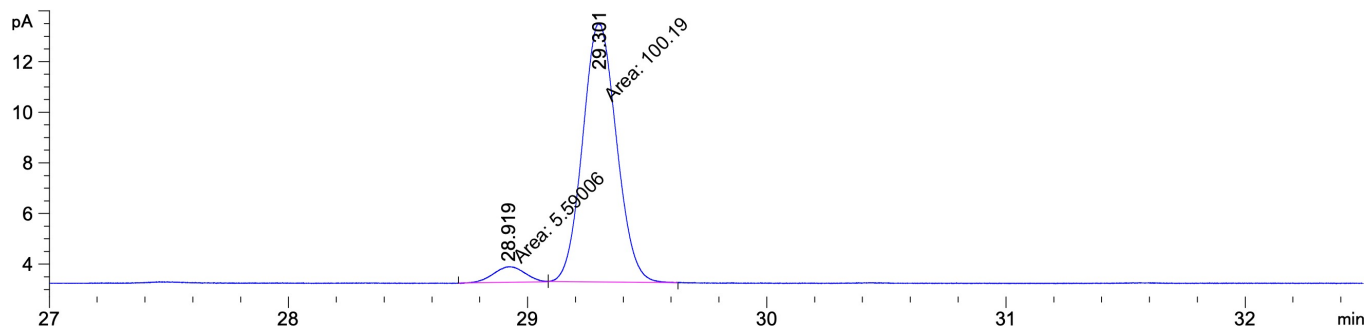

| Peak # | RetTime [min] | Type | Width [min] | Area [pA*s] | Height [pA] | Area %   |
|--------|---------------|------|-------------|-------------|-------------|----------|
| 1      | 28.919        | MM   | 0.1507      | 5.59006     | 6.18342e-1  | 5.28461  |
| 2      | 29.301        | MM   | 0.1637      | 100.18998   | 10.19746    | 94.71539 |

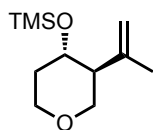

GC (CP-Chirasil Dex CB, 25 m)  
80 °C - 100 °C, 0.5 °C/min, 7 psi

**21, 91% ee trans,  
67% ee cis**  
(ee evaluated using  
OTMS derivative)

*racemic sample*

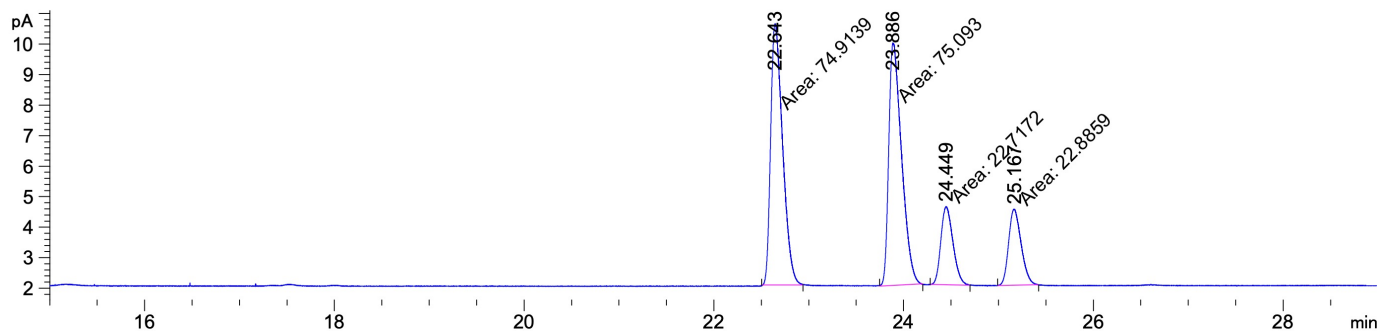

| Peak # | RetTime [min] | Type | Width [min] | Area [pA*s] | Height [pA] | Area %   |
|--------|---------------|------|-------------|-------------|-------------|----------|
| 1      | 22.643        | MM   | 0.1458      | 74.91386    | 8.56313     | 38.29756 |
| 2      | 23.886        | MM   | 0.1575      | 75.09303    | 7.94540     | 38.38915 |
| 3      | 24.449        | MM   | 0.1483      | 22.71725    | 2.55361     | 11.61354 |
| 4      | 25.167        | MM   | 0.1532      | 22.88588    | 2.48974     | 11.69975 |

*enantioenriched sample (trans)*

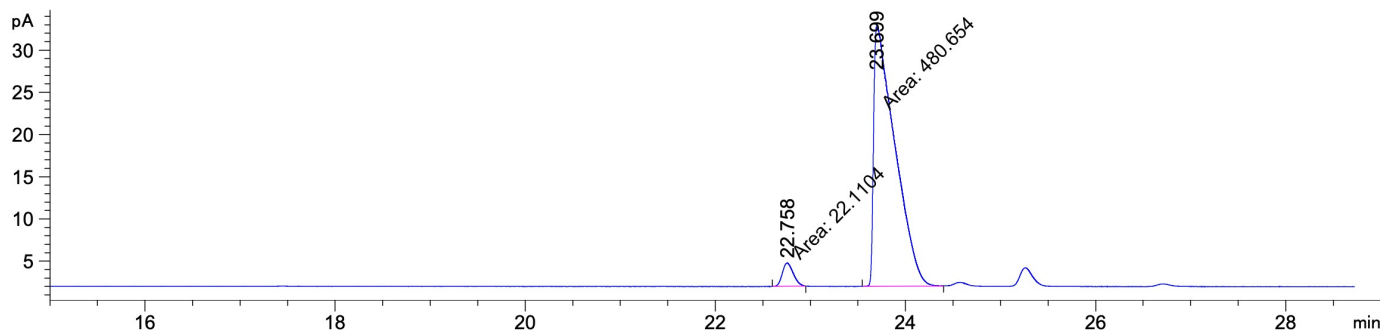

| Peak # | RetTime [min] | Type | Width [min] | Area [pA*s] | Height [pA] | Area %   |
|--------|---------------|------|-------------|-------------|-------------|----------|
| 1      | 22.758        | MM   | 0.1334      | 22.11038    | 2.76336     | 4.39776  |
| 2      | 23.699        | MM   | 0.2571      | 480.65439   | 31.15800    | 95.60224 |

enantioenriched sample (cis)

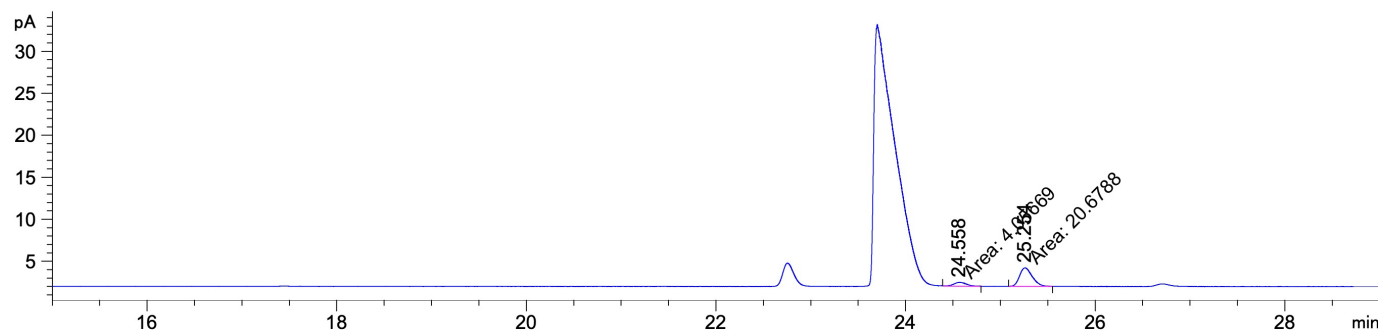

| Peak # | RetTime [min] | Type | Width [min] | Area [pA*s] | Height [pA] | Area %   |
|--------|---------------|------|-------------|-------------|-------------|----------|
| 1      | 24.558        | MM   | 0.1479      | 4.05669     | 4.57234e-1  | 16.40028 |
| 2      | 25.254        | MM   | 0.1559      | 20.67879    | 2.21013     | 83.59972 |

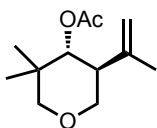

GC (CP-Chirasil Dex CB, 25 m)  
80 °C - 130 °C, 0.5 °C/min, 7 psi

**2m, 90% ee trans,  
84% ee cis**  
(ee evaluated using  
OAc derivative)

*racemic sample*

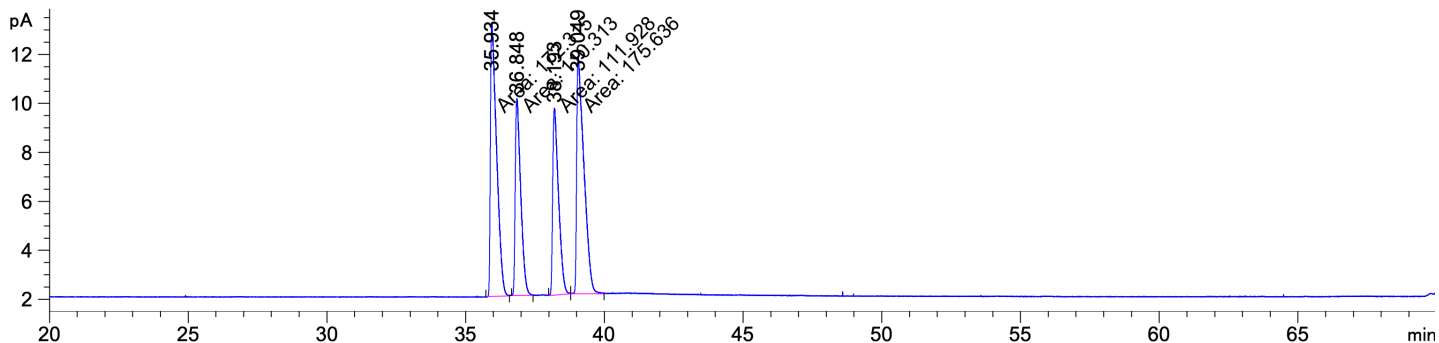

| Peak # | RetTime [min] | Type | Width [min] | Area [pA*s] | Height [pA] | Area %   |
|--------|---------------|------|-------------|-------------|-------------|----------|
| 1      | 35.934        | MM   | 0.2567      | 172.31531   | 11.18616    | 30.22056 |
| 2      | 36.848        | MM   | 0.2289      | 110.31258   | 8.03231     | 19.34656 |
| 3      | 38.193        | MM   | 0.2445      | 111.92847   | 7.63130     | 19.62995 |
| 4      | 39.049        | MM   | 0.3030      | 175.63593   | 9.66214     | 30.80293 |

*enantiomeriched sample (trans)*

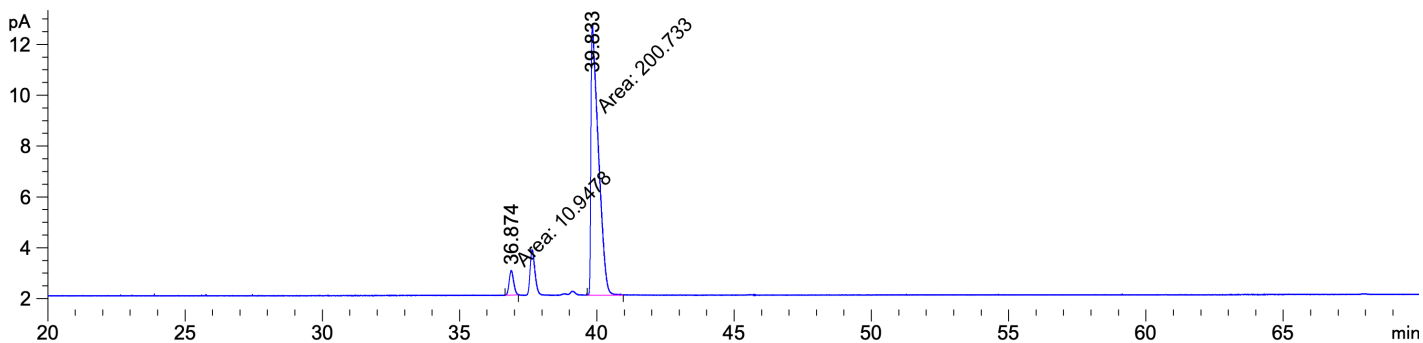

| Peak # | RetTime [min] | Type | Width [min] | Area [pA*s] | Height [pA] | Area %   |
|--------|---------------|------|-------------|-------------|-------------|----------|
| 1      | 36.874        | MM   | 0.1874      | 10.94784    | 9.73827e-1  | 5.17187  |
| 2      | 39.833        | MM   | 0.3141      | 200.73259   | 10.65262    | 94.82813 |

enantioenriched sample (cis)

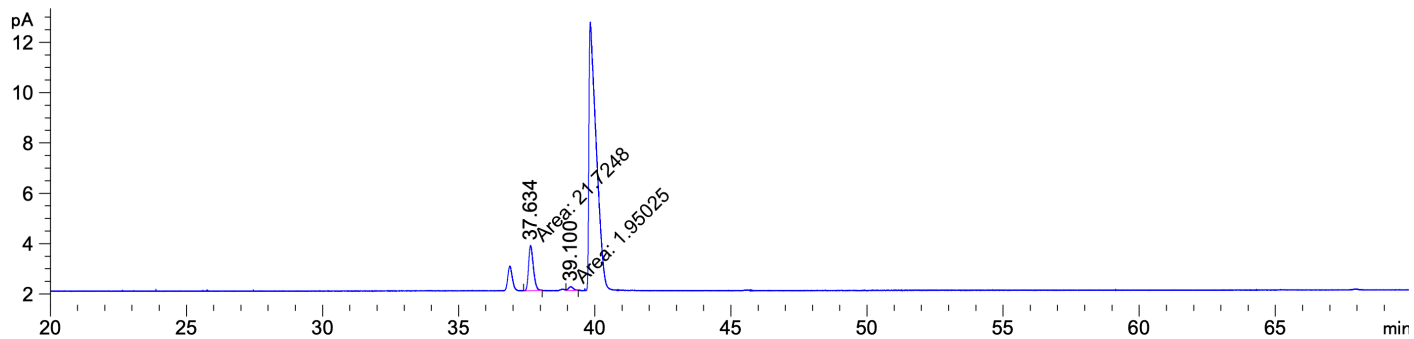

| Peak # | RetTime [min] | Type | Width [min] | Area [pA*s] | Height [pA] | Area %   |
|--------|---------------|------|-------------|-------------|-------------|----------|
| 1      | 37.634        | MM   | 0.2021      | 21.72478    | 1.79115     | 91.76243 |
| 2      | 39.100        | MM   | 0.2085      | 1.95025     | 1.55931e-1  | 8.23757  |

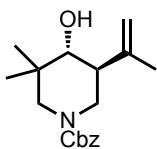

**2n, 90% ee trans,  
70% ee cis**

HPLC (AD-H)  
4% IPA/Hexanes, 1 mL/min, 210 nm

*racemic sample*

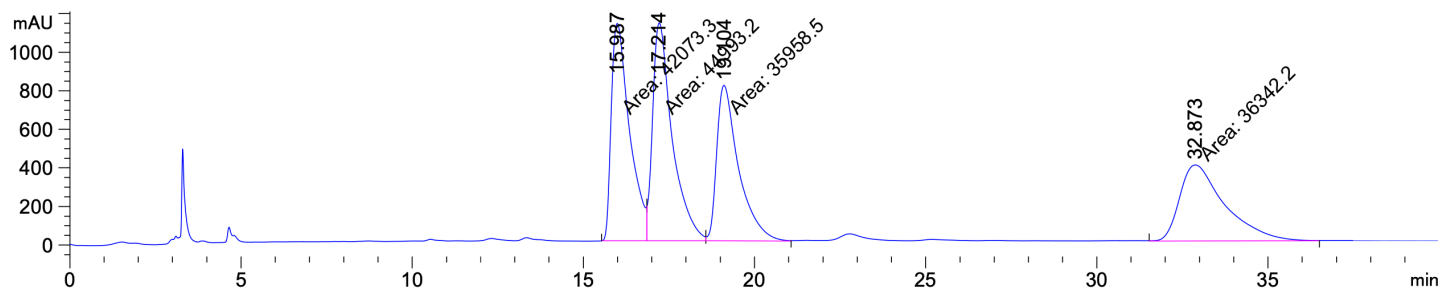

| Peak # | RetTime [min] | Type | Width [min] | Area [mAU*s] | Height [mAU] | Area %  |
|--------|---------------|------|-------------|--------------|--------------|---------|
| 1      | 15.987        | MF   | 0.6216      | 4.20733e4    | 1128.03796   | 26.4002 |
| 2      | 17.214        | FM   | 0.6628      | 4.49932e4    | 1131.37769   | 28.2324 |
| 3      | 19.104        | FM   | 0.7420      | 3.59585e4    | 807.73743    | 22.5633 |
| 4      | 32.873        | MM   | 1.5317      | 3.63422e4    | 395.45508    | 22.8041 |

*enantiomeriched sample (trans)*

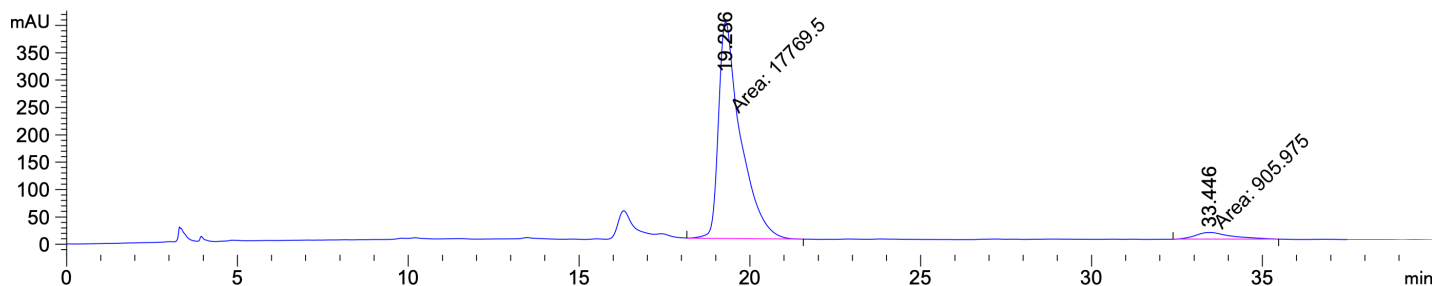

| Peak # | RetTime [min] | Type | Width [min] | Area [mAU*s] | Height [mAU] | Area %  |
|--------|---------------|------|-------------|--------------|--------------|---------|
| 1      | 19.286        | MM   | 0.7481      | 1.77695e4    | 395.89987    | 95.1488 |
| 2      | 33.446        | MM   | 1.2215      | 905.97540    | 12.36198     | 4.8512  |

enantioenriched sample (cis)

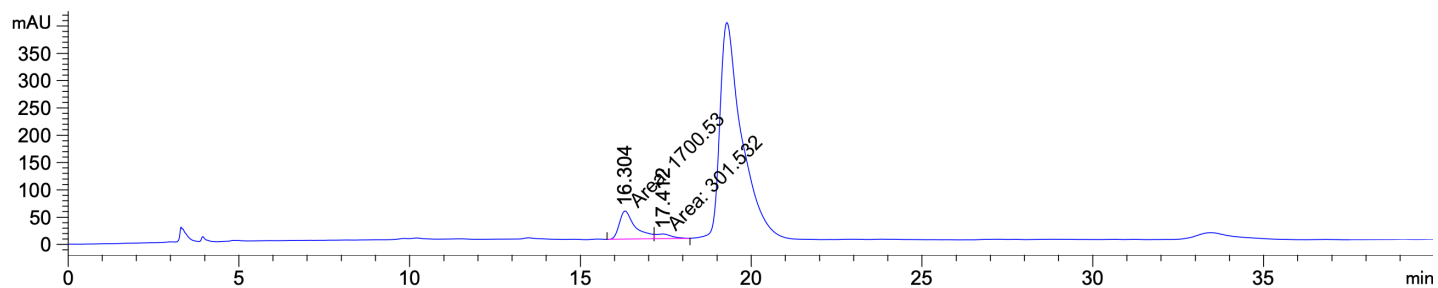

| Peak # | RetTime [min] | Type | Width [min] | Area [mAU*s] | Height [mAU] | Area %  |
|--------|---------------|------|-------------|--------------|--------------|---------|
| 1      | 16.304        | MF   | 0.5494      | 1700.53308   | 51.58600     | 84.9389 |
| 2      | 17.412        | FM   | 0.5630      | 301.53235    | 8.92564      | 15.0611 |



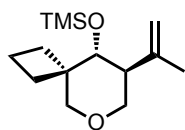

**2o, 94% ee trans,  
83% ee cis**  
(ee evaluated using  
OTMS derivative)

GC (CP-Chirasil Dex CB, 25 m)  
80 °C - 120 °C, 0.5 °C/min, 7 psi

*racemic sample*

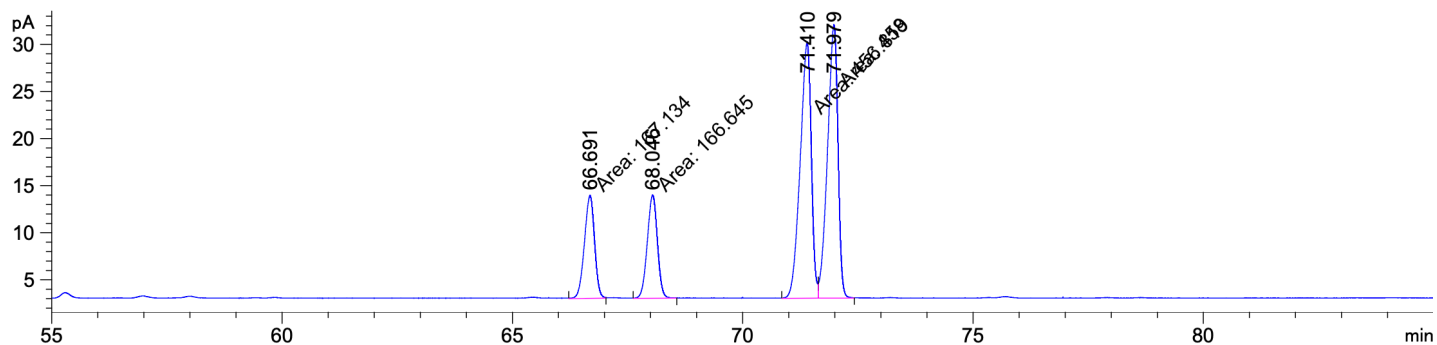

| Peak # | RetTime [min] | Type | Width [min] | Area [pA*s] | Height [pA] | Area %   |
|--------|---------------|------|-------------|-------------|-------------|----------|
| 1      | 66.691        | MM   | 0.2542      | 167.13368   | 10.95740    | 13.38571 |
| 2      | 68.046        | MM   | 0.2534      | 166.64456   | 10.96129    | 13.34654 |
| 3      | 71.410        | MF   | 0.2794      | 456.81900   | 27.24578    | 36.58656 |
| 4      | 71.979        | FM   | 0.2630      | 458.00046   | 29.02702    | 36.68119 |

*enantiomeriched sample (trans)*

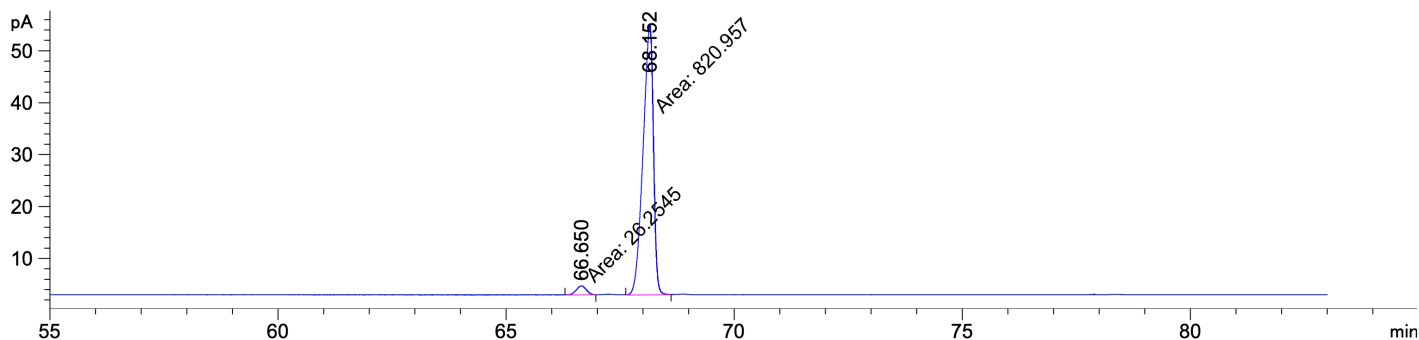

| Peak # | RetTime [min] | Type | Width [min] | Area [pA*s] | Height [pA] | Area %   |
|--------|---------------|------|-------------|-------------|-------------|----------|
| 1      | 66.650        | MM   | 0.2527      | 26.25447    | 1.73186     | 3.09893  |
| 2      | 68.152        | MM   | 0.2630      | 820.95673   | 52.01600    | 96.90107 |

enantioenriched sample (cis)

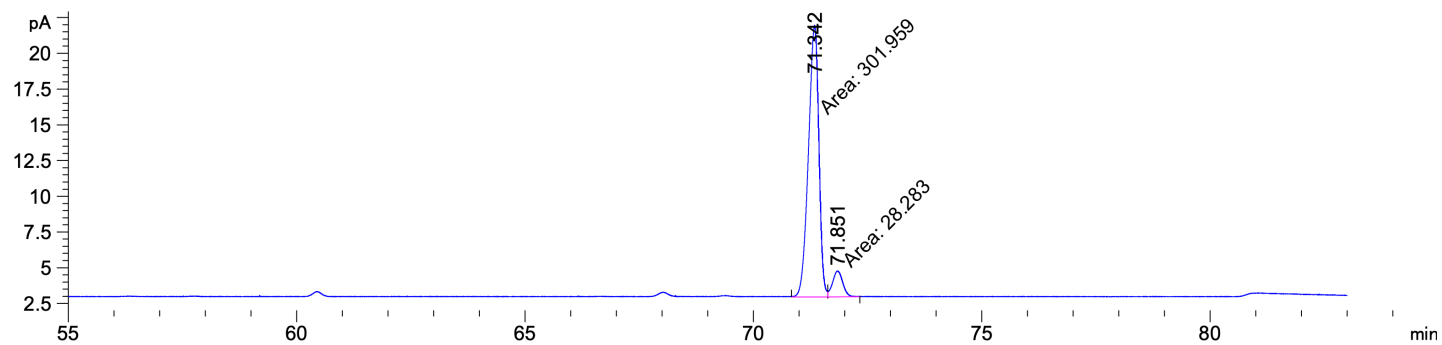

| Peak # | RetTime [min] | Type | Width [min] | Area [pA*s] | Height [pA] | Area %   |
|--------|---------------|------|-------------|-------------|-------------|----------|
| 1      | 71.342        | MF   | 0.2654      | 301.95911   | 18.96229    | 91.43569 |
| 2      | 71.851        | FM   | 0.2602      | 28.28296    | 1.81187     | 8.56431  |

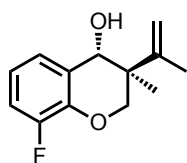

**2p, 96% ee**

HPLC (AS-H)  
5% IPA/Hexanes, 1 mL/min, 210 nm

*racemic sample*

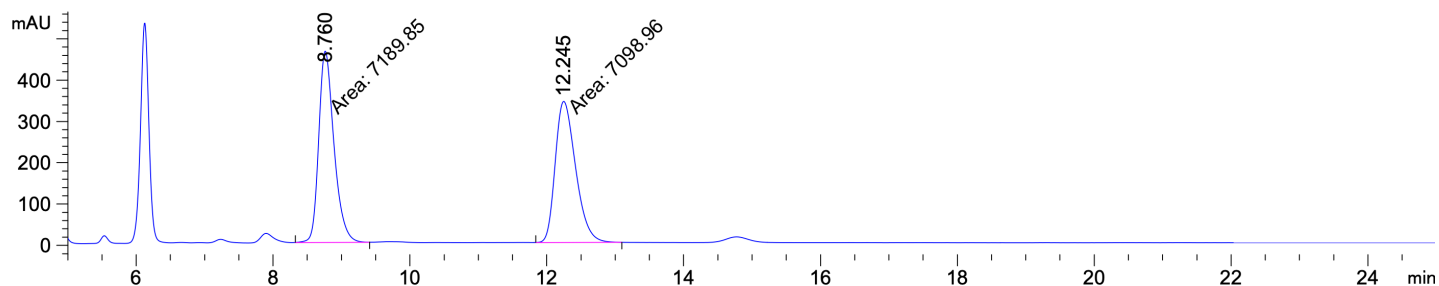

| Peak # | RetTime [min] | Type | Width [min] | Area [mAU*s] | Height [mAU] | Area %  |
|--------|---------------|------|-------------|--------------|--------------|---------|
| 1      | 8.760         | MM   | 0.2586      | 7189.84717   | 463.45813    | 50.3180 |
| 2      | 12.245        | MM   | 0.3460      | 7098.96338   | 341.93777    | 49.6820 |

*enantioenriched sample*

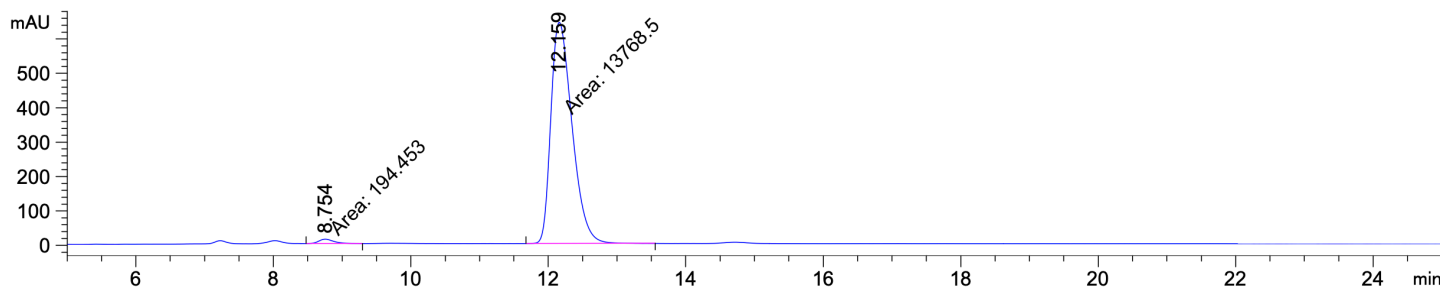

| Peak # | RetTime [min] | Type | Width [min] | Area [mAU*s] | Height [mAU] | Area %  |
|--------|---------------|------|-------------|--------------|--------------|---------|
| 1      | 3.362         | VB   | 0.1234      | 8.36266      | 1.04426      | 1.7544  |
| 2      | 12.159        | BB   | 0.3271      | 468.31775    | 22.47377     | 98.2456 |

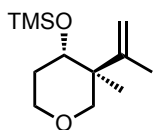

GC (Cyclosil-B, 30 m)  
80 °C - 120 °C, 0.5 °C/min, 7 psi

**2q, 83% ee trans,**  
**62% ee cis**  
(ee evaluated using  
OTMS derivative)

*racemic sample*

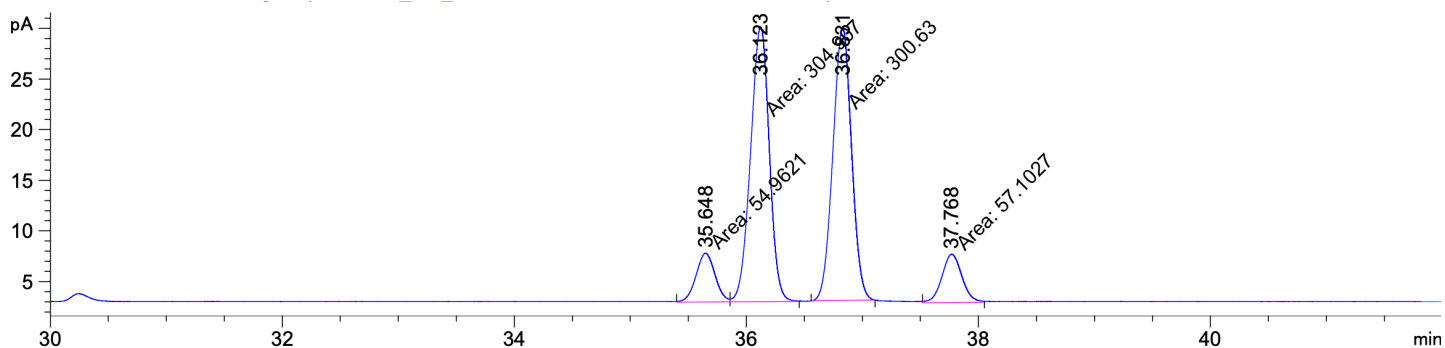

| Peak # | RetTime [min] | Type | Width [min] | Area [pA*s] | Height [pA] | Area %   |
|--------|---------------|------|-------------|-------------|-------------|----------|
| 1      | 35.648        | MF   | 0.1897      | 54.96210    | 4.82862     | 7.65913  |
| 2      | 36.123        | FM   | 0.1870      | 304.90744   | 27.17875    | 42.48974 |
| 3      | 36.831        | MM   | 0.1858      | 300.63022   | 26.97410    | 41.89370 |
| 4      | 37.768        | MM   | 0.1991      | 57.10271    | 4.78124     | 7.95743  |

*enantiomeriched sample (trans)*

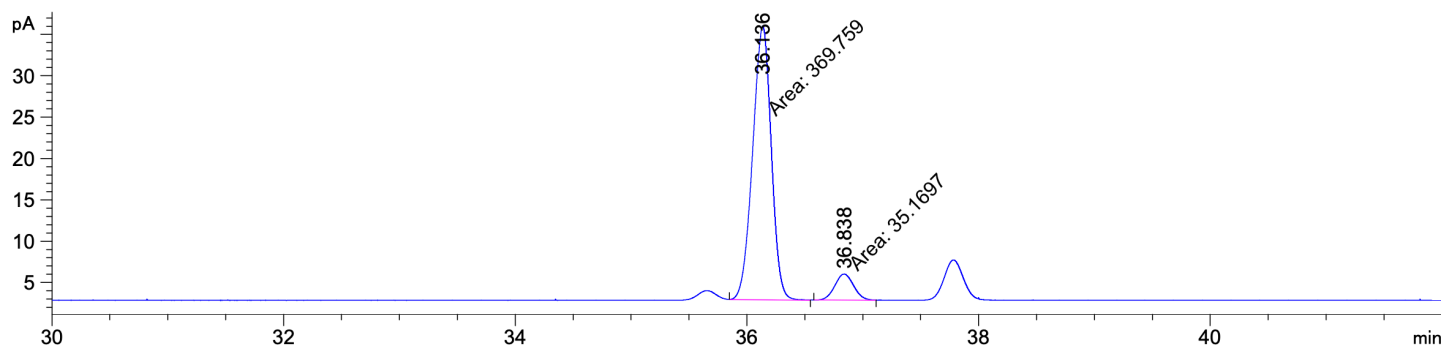

| Peak # | RetTime [min] | Type | Width [min] | Area [pA*s] | Height [pA] | Area %   |
|--------|---------------|------|-------------|-------------|-------------|----------|
| 1      | 36.136        | MM   | 0.1860      | 369.75946   | 33.13818    | 91.31461 |
| 2      | 36.838        | MM   | 0.1868      | 35.16969    | 3.13776     | 8.68539  |

enantioenriched sample (cis)

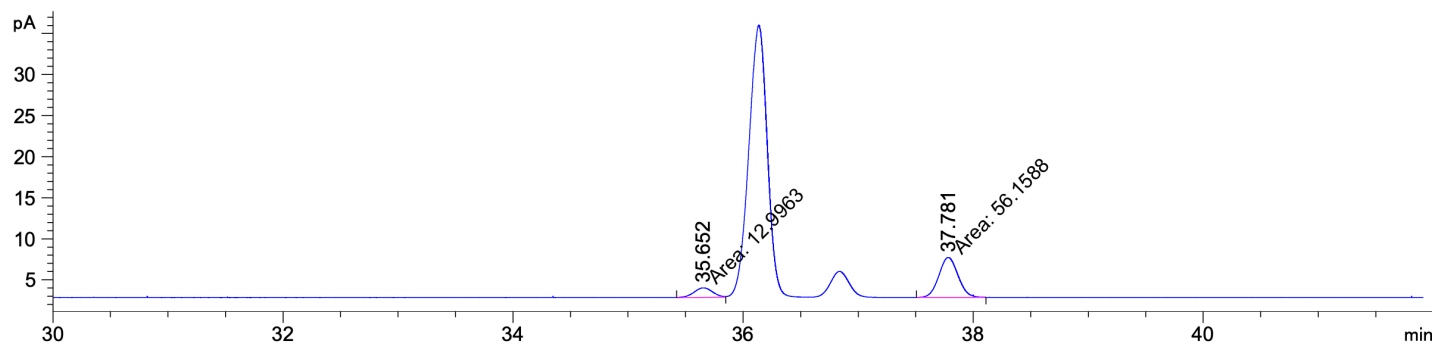

| Peak # | RetTime [min] | Type | Width [min] | Area [pA*s] | Height [pA] | Area %   |
|--------|---------------|------|-------------|-------------|-------------|----------|
| 1      | 35.652        | MM   | 0.1863      | 12.99626    | 1.16268     | 18.79292 |
| 2      | 37.781        | MM   | 0.1926      | 56.15882    | 4.86080     | 81.20708 |

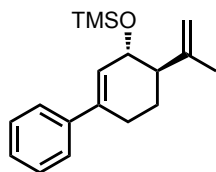

**2r, 90% ee**  
(ee evaluated using  
OTMS derivative)

GC (CP-Chirasil Dex CB, 25 m)  
120 °C - 160 °C, 0.5 °C/min, 7 psi

*racemic sample*

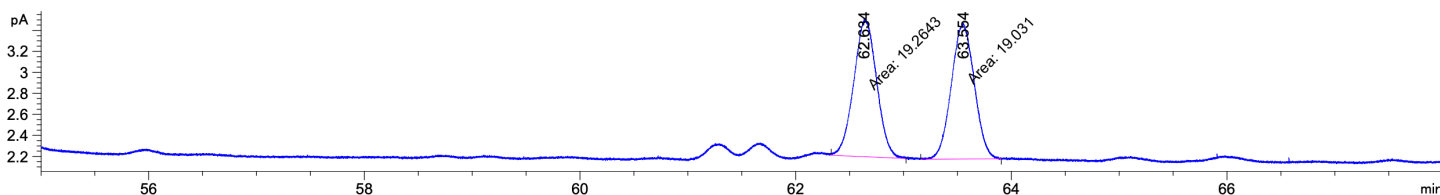

| Peak # | RetTime [min] | Type | Width [min] | Area [pA*s] | Height [pA] | Area %   |
|--------|---------------|------|-------------|-------------|-------------|----------|
| 1      | 62.634        | MM   | 0.2436      | 19.26432    | 1.31811     | 50.30457 |
| 2      | 63.554        | MM   | 0.2456      | 19.03105    | 1.29166     | 49.69543 |

*enantiomeriched sample*

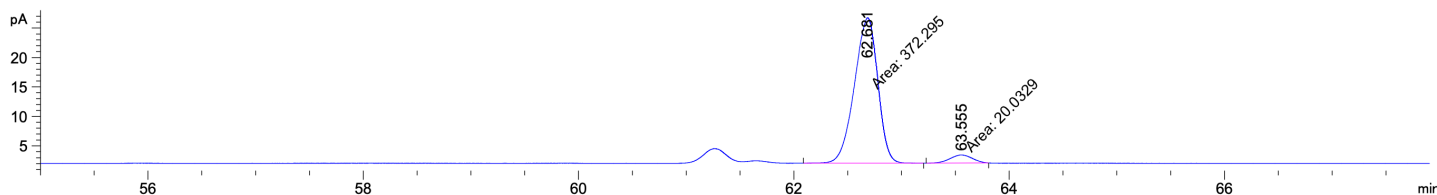

| Peak # | RetTime [min] | Type | Width [min] | Area [pA*s] | Height [pA] | Area %   |
|--------|---------------|------|-------------|-------------|-------------|----------|
| 1      | 62.681        | MM   | 0.2515      | 372.29523   | 24.67207    | 94.89385 |
| 2      | 63.555        | MM   | 0.2402      | 20.03287    | 1.38978     | 5.10615  |

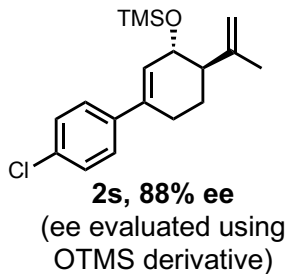

GC (CP-Chirasil Dex CB, 25 m)  
120 °C - 170 °C, 0.5 °C/min, 7 psi

*racemic sample*

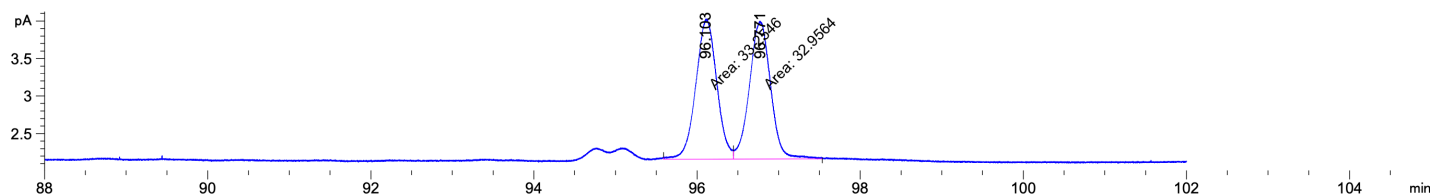

| Peak # | RetTime [min] | Type | Width [min] | Area [pA*s] | Height [pA] | Area %   |
|--------|---------------|------|-------------|-------------|-------------|----------|
| 1      | 96.103        | MF   | 0.2970      | 33.25460    | 1.86588     | 50.22518 |
| 2      | 96.771        | FM   | 0.3007      | 32.95641    | 1.82650     | 49.77482 |

*enantioenriched sample*

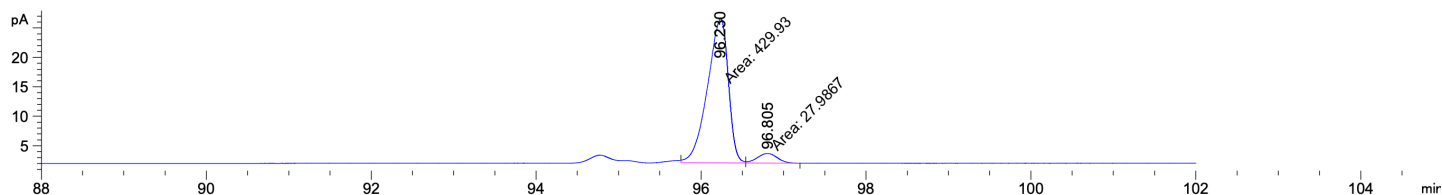

| Peak # | RetTime [min] | Type | Width [min] | Area [pA*s] | Height [pA] | Area %   |
|--------|---------------|------|-------------|-------------|-------------|----------|
| 1      | 96.230        | MF   | 0.2920      | 429.93018   | 24.54067    | 93.88826 |
| 2      | 96.805        | FM   | 0.2826      | 27.98669    | 1.65031     | 6.11174  |

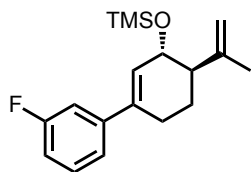

**2t, 90% ee**

(ee evaluated using  
OTMS derivative)

GC (CP-Chirasil Dex CB, 25 m)  
120 °C - 170 °C, 0.5 °C/min, 7 psi

*racemic sample*

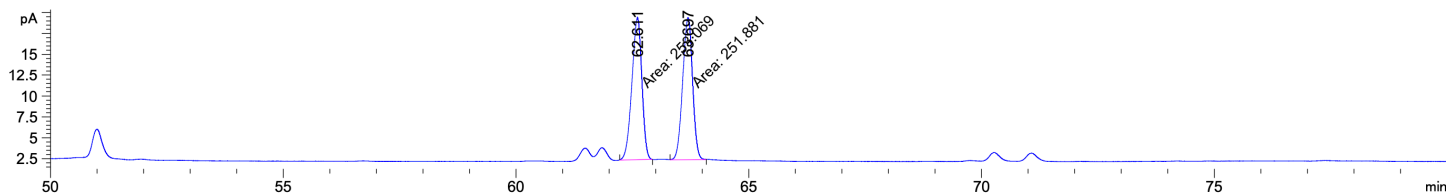

| Peak # | RetTime [min] | Type | Width [min] | Area [pA*s] | Height [pA] | Area %   |
|--------|---------------|------|-------------|-------------|-------------|----------|
| 1      | 62.611        | MM   | 0.2471      | 253.06856   | 17.07188    | 50.11761 |
| 2      | 63.697        | MM   | 0.2462      | 251.88086   | 17.04796    | 49.88239 |

*enantioenriched sample*

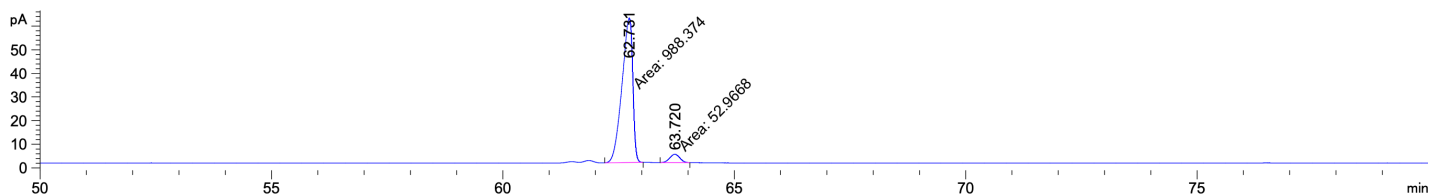

| Peak # | RetTime [min] | Type | Width [min] | Area [pA*s] | Height [pA] | Area %   |
|--------|---------------|------|-------------|-------------|-------------|----------|
| 1      | 62.731        | MM   | 0.2693      | 988.37372   | 61.16815    | 94.91359 |
| 2      | 63.720        | MM   | 0.2486      | 52.96683    | 3.55066     | 5.08641  |



## 6. Kinetics Experiments

### 6.1 Rates of Edman degradation

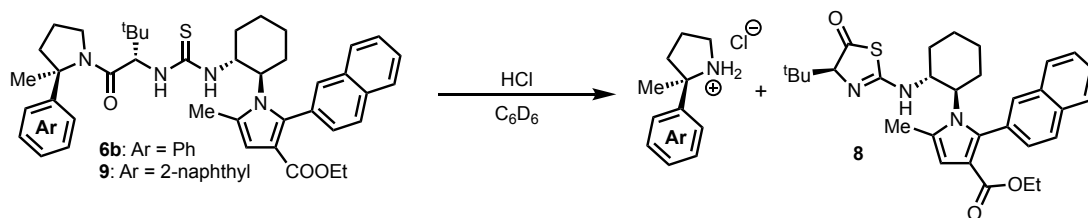

**Figure S6.** Kinetic analysis of Edman degradation.

Kinetics experiments measuring the rates of Edman degradation of catalysts **6b** and **9** were carried out using <sup>1</sup>H NMR spectroscopy with reactions conducted in oven-dried 5 mm diameter NMR tubes. Data collection was performed on an INOVA-600 NMR spectrometer (600 MHz). Experiments were conducted at 21.3 ± 0.2 °C over a period of 20 minutes, with spectra collected at fixed 10 second intervals with 1.5 second acquisition times and 8.5 second relaxation delays. <sup>1</sup>H NMR spectra were analyzed in MestReNova (Mestrelab Research) using phase and baseline corrections. Data extracted from these spectra were analyzed and plotted using Microsoft Excel. Concentration versus time data were fitted to linear functions using a least-squares algorithm in Microsoft Excel.

#### *Sample procedure for kinetics experiments:*

A 1000 μL stock solution of HCl in C<sub>6</sub>D<sub>6</sub> was prepared by the addition of 240 μL of 2.11 M HCl in Et<sub>2</sub>O to 760 μL of C<sub>6</sub>D<sub>6</sub> in a flame-dried vial. Separately, an HBD stock solution was prepared by weighing **6b** or **9** (0.0119 g or 0.0126 g respectively) into a flame-dried vial followed by addition of 1700 μL of C<sub>6</sub>D<sub>6</sub>. To the HBD stock solution was added 5 μL of 1,1,2,2-tetrachloroethane as a quantitative internal standard. 500 μL of this stock solution were distributed between three identical oven-dried NMR tubes, which were then capped with rubber septa and sealed with parafilm. A single NMR spectrum was obtained for the purposes of determining the appropriate acquisition parameters (shim, gain, etc.). The NMR tube was removed from the spectrometer and 10 μL of the HCl stock solution (0.005 mmol, 1 eq.) were added to initiate reactions. The NMR tube was inverted several times and then returned to the NMR probe. The time delay between addition of the HCl stock solution and the beginning of data acquisition was recorded and factored into kinetic models. Experiments were conducted in triplicate. All reactions were found to be homogeneous over the entire reaction course.

HBD concentration was determined by integration of the signal corresponding to the pyrrole methyl group (δ = 2.65 ppm) against the tetrachloroethane internal standard (δ = 4.88 ppm). For all reactions, it was found that no significant side products were formed and the only observable reaction was clean Edman degradation. The first 10% conversion of [HBD] versus time data were fitted to linear functions using a minimization of squares algorithm in Microsoft Excel. Initial rates were taken to be the slopes of fitted concentration vs time data. Reported error values in relative rate measurements were derived by standard error propagation using standard deviations of individual kinetics runs.

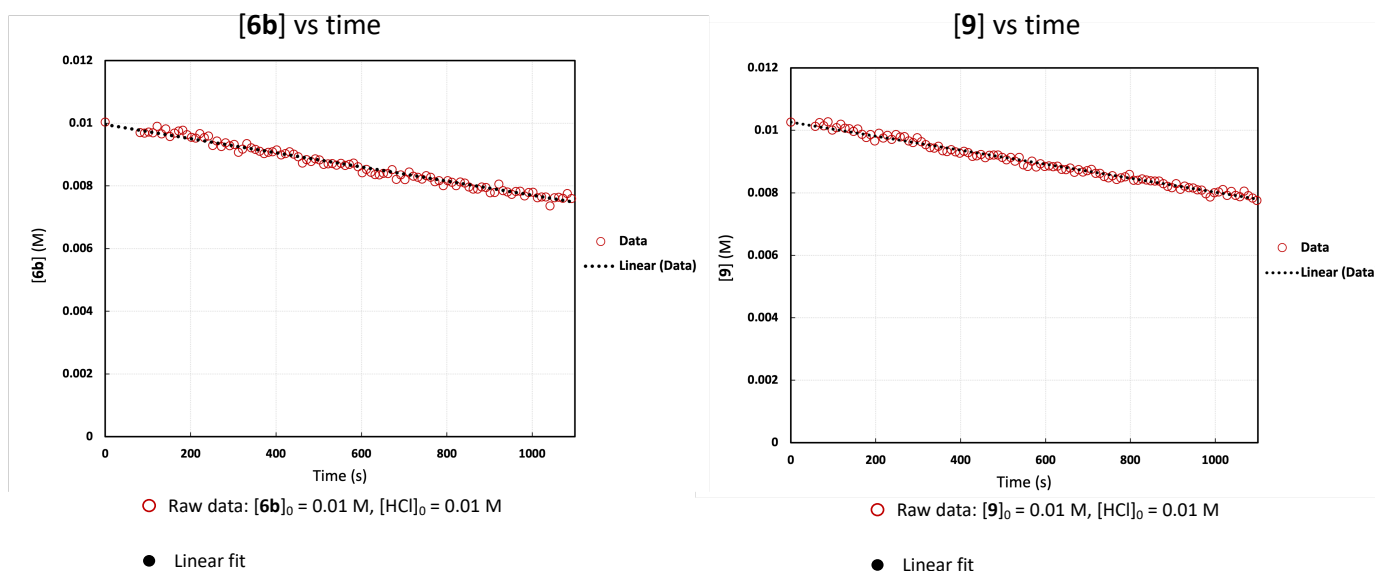

**Figure S7.** Representative concentration vs time data set for HBD Edman degradation experiments with linear curve fits.

Representative datasets for the degradation reactions of **6b** and **9** are provided below:

| Time (s) | [6b] (M)   | Time (s) | [9] (M)    |
|----------|------------|----------|------------|
| 0        | 0.0100355  | 0        | 0.01025982 |
| 82       | 0.00970044 | 58       | 0.01012308 |
| 92       | 0.00968178 | 68       | 0.01023925 |
| 102      | 0.00971506 | 78       | 0.0101398  |
| 112      | 0.00969143 | 88       | 0.01026513 |
| 122      | 0.00990195 | 98       | 0.0100031  |
| 132      | 0.0096547  | 108      | 0.01007839 |
| 142      | 0.00981825 | 118      | 0.01018821 |
| 152      | 0.00957605 | 128      | 0.01006183 |
| 162      | 0.00968121 | 138      | 0.01005084 |
| 172      | 0.00975043 | 148      | 0.00996399 |
| 182      | 0.00977306 | 158      | 0.0100347  |
| 192      | 0.00963169 | 168      | 0.00986579 |
| 202      | 0.0095498  | 178      | 0.00976624 |
| 212      | 0.00952029 | 188      | 0.00985888 |
| 222      | 0.00966238 | 198      | 0.00965893 |
| 232      | 0.00954204 | 208      | 0.00989823 |
| 242      | 0.00958534 | 218      | 0.00974771 |
| 252      | 0.00928834 | 228      | 0.00983043 |
| 262      | 0.00942607 | 238      | 0.00970567 |
| 272      | 0.00925692 | 248      | 0.00986384 |
| 282      | 0.00937327 | 258      | 0.00978377 |
| 292      | 0.00927583 | 268      | 0.00978885 |
| 302      | 0.00932084 | 278      | 0.00965258 |
| 312      | 0.00907049 | 288      | 0.00960851 |
| 322      | 0.00917332 | 298      | 0.0097607  |
| 332      | 0.00934771 | 308      | 0.0096312  |
| 342      | 0.00920944 | 318      | 0.00953763 |
| 352      | 0.0091625  | 328      | 0.00944641 |
| 362      | 0.00910051 | 338      | 0.00942285 |
| 372      | 0.00902683 | 348      | 0.00948735 |
| 382      | 0.00906956 | 358      | 0.00934149 |
| 392      | 0.00908875 | 368      | 0.00931219 |
| 402      | 0.00914613 | 378      | 0.00937848 |
| 412      | 0.00898861 | 388      | 0.00931036 |
| 422      | 0.00902488 | 398      | 0.00926459 |
| 432      | 0.00908667 | 408      | 0.00932118 |
| 442      | 0.00900978 | 418      | 0.00927927 |
| 452      | 0.00892439 | 428      | 0.00916397 |

|     |            |     |            |
|-----|------------|-----|------------|
| 462 | 0.00872586 | 438 | 0.00917865 |
| 472 | 0.00883631 | 448 | 0.00922116 |
| 482 | 0.00877739 | 458 | 0.00912311 |
| 492 | 0.00885806 | 468 | 0.00920021 |
| 502 | 0.00882901 | 478 | 0.00920482 |
| 512 | 0.00868733 | 488 | 0.00920202 |
| 522 | 0.00870213 | 498 | 0.0091305  |
| 532 | 0.00870427 | 508 | 0.00905516 |
| 542 | 0.00865763 | 518 | 0.00912527 |
| 552 | 0.00871876 | 528 | 0.00901276 |
| 562 | 0.00865197 | 538 | 0.0091279  |
| 572 | 0.00868216 | 548 | 0.00888738 |
| 582 | 0.00872921 | 558 | 0.00883721 |
| 592 | 0.00860929 | 568 | 0.00900981 |
| 602 | 0.00841107 | 578 | 0.00882468 |
| 612 | 0.00852373 | 588 | 0.00892465 |
| 622 | 0.0084344  | 598 | 0.00883621 |
| 632 | 0.00836    | 608 | 0.00885921 |
| 642 | 0.00835069 | 618 | 0.00883188 |
| 652 | 0.00840077 | 628 | 0.00884564 |
| 662 | 0.00839392 | 638 | 0.00874946 |
| 672 | 0.00851844 | 648 | 0.00873732 |
| 682 | 0.00820784 | 658 | 0.00879037 |
| 692 | 0.0083492  | 668 | 0.00865454 |
| 702 | 0.00819895 | 678 | 0.00873551 |
| 712 | 0.00843728 | 688 | 0.00866448 |
| 722 | 0.00830742 | 698 | 0.00870653 |
| 732 | 0.00827052 | 708 | 0.00874277 |
| 742 | 0.00821408 | 718 | 0.00862098 |
| 752 | 0.00832096 | 728 | 0.00861512 |
| 762 | 0.00827537 | 738 | 0.00851648 |
| 772 | 0.00813058 | 748 | 0.00847247 |
| 782 | 0.00816368 | 758 | 0.00854401 |
| 792 | 0.00800509 | 768 | 0.00842532 |
| 802 | 0.00816243 | 778 | 0.00847522 |
| 812 | 0.0081143  | 788 | 0.00850595 |
| 822 | 0.00800188 | 798 | 0.00858556 |
| 832 | 0.00812294 | 808 | 0.00840123 |
| 842 | 0.00808582 | 818 | 0.0083945  |
| 852 | 0.00796279 | 828 | 0.0084404  |
| 862 | 0.00789284 | 838 | 0.00840626 |
| 872 | 0.00789462 | 848 | 0.00838079 |

|      |            |      |            |
|------|------------|------|------------|
| 882  | 0.00796623 | 858  | 0.00837193 |
| 892  | 0.00794293 | 868  | 0.00837151 |
| 902  | 0.00778131 | 878  | 0.00828388 |
| 912  | 0.00778312 | 888  | 0.00820007 |
| 922  | 0.00805051 | 898  | 0.00816193 |
| 932  | 0.00784594 | 908  | 0.0082839  |
| 942  | 0.00780151 | 918  | 0.00810843 |
| 952  | 0.00772685 | 928  | 0.00820844 |
| 962  | 0.00781965 | 938  | 0.00815799 |
| 972  | 0.00782533 | 948  | 0.00814811 |
| 982  | 0.00767983 | 958  | 0.00809326 |
| 992  | 0.00778608 | 968  | 0.00808575 |
| 1002 | 0.00779489 | 978  | 0.00796392 |
| 1012 | 0.00762059 | 988  | 0.00786187 |
| 1022 | 0.00764202 | 998  | 0.00799783 |
| 1032 | 0.00763958 | 1008 | 0.00802631 |
| 1042 | 0.00736006 | 1018 | 0.00809677 |
| 1052 | 0.00761474 | 1028 | 0.00791044 |
| 1062 | 0.00763593 | 1038 | 0.00803837 |
| 1072 | 0.00759793 | 1048 | 0.00791431 |
| 1082 | 0.00774933 | 1058 | 0.00787399 |
| 1092 | 0.00759673 | 1068 | 0.00805185 |
| 1102 | 0.00739726 | 1078 | 0.00790813 |
| 1112 | 0.00755048 | 1088 | 0.0078249  |
| 1122 | 0.00746073 | 1098 | 0.00775319 |
| 1132 | 0.00742107 | 1108 | 0.00784539 |
| 1142 | 0.00758448 | 1118 | 0.00780482 |
| 1152 | 0.00739268 | 1128 | 0.00782117 |
| 1162 | 0.00748862 | 1138 | 0.00782673 |
| 1172 | 0.0072283  | 1148 | 0.00773178 |
| 1182 | 0.00732908 | 1158 | 0.00766357 |
| 1192 | 0.00714757 | 1168 | 0.00765839 |
| 1202 | 0.00728532 | 1178 | 0.00773477 |
| 1212 | 0.00729081 | 1188 | 0.0076346  |
| 1222 | 0.00720839 | 1198 | 0.00764826 |
| 1232 | 0.00741996 | 1208 | 0.00765988 |
| 1242 | 0.00716423 | 1218 | 0.00753618 |
| 1252 | 0.00730219 | 1228 | 0.00760887 |
| 1262 | 0.0071737  | 1238 | 0.00741832 |
| 1272 | 0.00711233 | 1248 | 0.00745556 |

| trial                                    | Initial rate ( $k_{obs}$ ) (M/s) | trial                                    | Initial rate ( $k_{obs}$ ) (M/s) |
|------------------------------------------|----------------------------------|------------------------------------------|----------------------------------|
| 6b-Run 1                                 | 2.74 E-06                        | 9-Run 1                                  | 2.64 E-06                        |
| 6b-Run 2                                 | 2.71 E-06                        | 9-Run 2                                  | 2.79 E-06                        |
| 6b-Run 3                                 | 2.52 E-06                        | 9-Run 3                                  | 2.50 E-06                        |
| <b>Average <math>k_{obs}</math>:</b>     | 2.65 E-06                        | <b>Average <math>k_{obs}</math>:</b>     | 2.64 E-06                        |
| <b>Stdev.:</b>                           | 1.20 E-07                        | <b>Stdev.:</b>                           | 1.42 E-07                        |
| $k_{rel} = k_{6b} / k_9 = 1.01 \pm 0.07$ |                                  | $k_{rel} = k_9 / k_{6b} = 0.99 \pm 0.07$ |                                  |

**Figure S8.** Results of Edman degradation kinetics experiments.

## 6.2 Rates of Prins cyclization reactions

Kinetic experiments measuring the rates of Prins cyclization reactions were performed using in situ attenuated total reflectance Fourier-transform infrared (ATR FTIR) spectroscopy to track the consumption of aldehyde **1b**. Measurements were performed using a Mettler Toledo ReactIR™ iC 10 ATR FTIR spectrometer and a 9 mm probe with a SiComp (silicon-based) window and a two-neck reaction vessel equipped with air-tight valves. Reactions were performed with the reaction vessel submerged in a temperature-equilibrated oil bath at  $23.1 \pm 0.2$  °C. Data for the relative rate measurements were acquired over multiple runs.

Time-dependent absorbance data were converted to time-dependent concentration data using the experimentally determined response factor and response constant at the infinity point (the slope and vertical axis intercept respectively in the plot below). Absorbance data were acquired using the aldehyde stretching frequency (with the maximum absorbance value in in range  $1715\text{-}1685$   $\text{cm}^{-1}$ ) with a two point baseline (defined from  $1750\text{-}1630$   $\text{cm}^{-1}$ ); here absorbance is measured as the height of the aldehyde peak extending from the two point baseline.

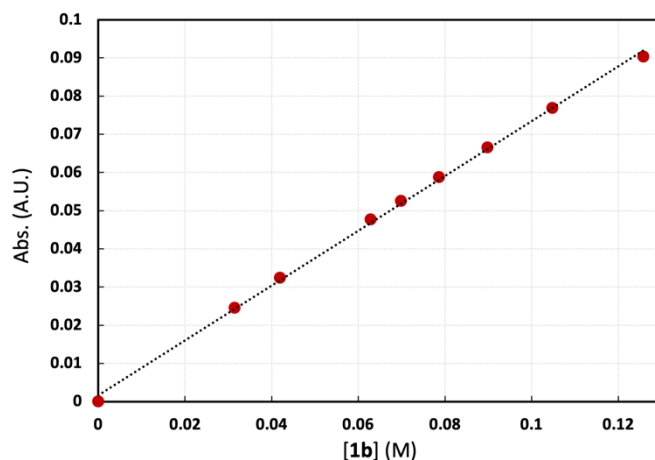

**Figure S9.** Beer's law plot for determination of the absorbance response factor for **1b** at  $1705$   $\text{cm}^{-1}$ .

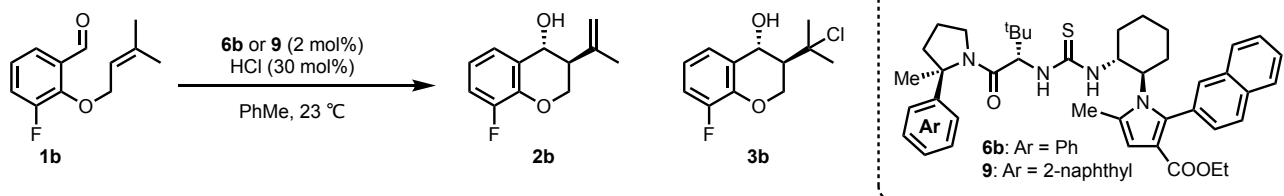

**Figure S10.** Model reaction for kinetic analysis.

*Sample procedure for kinetics experiments:*

A 9.0 mL stock solution of substrate **1b** (0.2007g, 1 eq.) and **9** (0.0143g, 2 mol%) in dry toluene was prepared and 2800  $\mu\text{L}$  of this stock solution were transferred to the oven-dried reaction vessel charged with a magnetic stir bar. The vessel was then submerged in

an oil bath ( $23.1 \pm 0.2$  °C) and allowed to equilibrate for several minutes prior to initiation of the reaction. A separate stock solution of HCl was generated (500  $\mu$ L of a 2.17 M solution in Et<sub>2</sub>O added to 1900  $\mu$ L of toluene) and 200  $\mu$ L of this solution were added to the reaction vessel to initiate reactions. The time delay between addition of HCl and acquisition of the first spectrum following addition was noted and factored into kinetics data. The effect of dilution upon addition of the HCl stock solution was also factored into kinetics data. Data were collected in 15 second intervals. All reactions catalyzed by **9** were observed to proceed to >98% conversion (as determined by <sup>19</sup>F NMR analysis of the crude reaction mixtures). Reactions were quenched by the addition of 100  $\mu$ L of triethylamine prior to analysis by <sup>19</sup>F NMR. The above procedure was followed in recording the rate of the Prins reaction catalyzed by **6b**. Both **9** and **6b** were found to be fully stable over the entire reaction course, with no detectable Edman degradation taking place using substrate **1b**. In recording the rate of the background process catalyzed by HCl alone, the above procedure was followed omitting HBD catalyst and using a 60 second data collection interval. All reactions were found to be homogeneous over the entire reaction course.

In order to increase the accuracy of initial rates measurements for reactions catalyzed by **9**, concentration vs. time data were first fit to 15<sup>th</sup> order polynomial functions. Initial rates were taken to be the slopes of linear least-squares fits of the polynomial-fitted conversion vs time data over the first 5% conversion. A good curve-fit was necessary to obtain reliable initial rates measurements since reactions typically proceed to >25% conversion within the first 4 data points. Initial rates measurements on the background reaction catalyzed by HCl alone were obtained using linear least-squares fits of the first 5% of conversion vs. time data. The slopes of these linear fits were taken to be the initial rates. The first time derivative of the polynomial fits of [**1b**] vs time data were used to extract instantaneous rates. The rate comparison between **9** and **6b** was performed using instantaneous rates at [**1b**] = 0.09 M. Reported error values in relative rate measurements were derived by standard error propagation using standard deviations of individual kinetics runs.

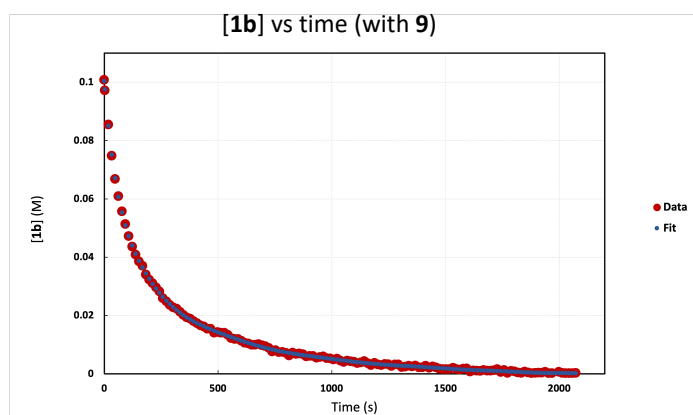

● Raw data: [**1b**]<sub>0</sub> = 0.1 M, [**9**]<sub>0</sub> = 0.002 M, [HCl] = 0.030 M

● ● Polynomial fit of the following form:

$$[1b] = A*(t^{15})+B*(t^{14})+C*(t^{13})+D*(t^{12})+E*(t^{11})+F*(t^{10})+G*(t^9)+H*(t^8) + I*(t^7)+J*(t^6)+K*(t^5)+L*(t^4)+M*(t^3)+N*(t^2)+O*(t)+P$$

$$[1b]_{fit} = (4.51E-46)*(t^{15})+(-6.87E-42)*(t^{14})+(4.65E-38)*(t^{13})+(-1.84E-34)*(t^{12})+(4.68E-31)*(t^{11})+(-7.93E-28)*(t^{10})+(8.77E-25)*(t^9)+(-5.58E-22)*(t^8)+(6.02E-20)*(t^7)+(2.39E-16)*(t^6)+(-2.41E-13)*(t^5)+(1.22E-10)*(t^4)+(-3.76E-8)*(t^3)+(7.33E-6)*(t^2)+(9.71E-4)*(t)+0.100$$

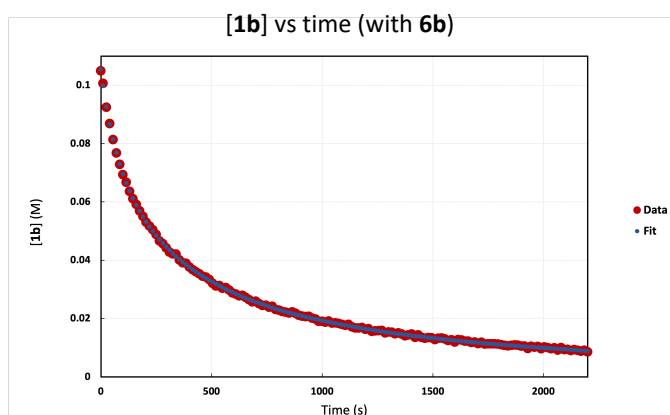

● Raw data: [**1b**]<sub>0</sub> = 0.1 M, [**6b**]<sub>0</sub> = 0.002 M, [HCl] = 0.030 M

● ● Polynomial fit of the following form:

$$[1b] = A*(t^{15})+B*(t^{14})+C*(t^{13})+D*(t^{12})+E*(t^{11})+F*(t^{10})+G*(t^9)+H*(t^8) + I*(t^7)+J*(t^6)+K*(t^5)+L*(t^4)+M*(t^3)+N*(t^2)+O*(t)+P$$

$$[1b]_{fit} = (-7.93E-48)*(t^{15})+(1.70E-43)*(t^{14})+(-1.65E-39)*(t^{13})+(9.57E-36)*(t^{12})+(-3.70E-32)*(t^{11})+(1.01E-28)*(t^{10})+(-1.98E-25)*(t^9)+(2.86E-22)*(t^8)+(-3.04E-19)*(t^7)+(2.38E-16)*(t^6)+(-1.35E-13)*(t^5)+(5.55E-11)*(t^4)+(-1.62E-8)*(t^3)+(3.45E-6)*(t^2)+(-5.85E-4)*(t)+0.105$$

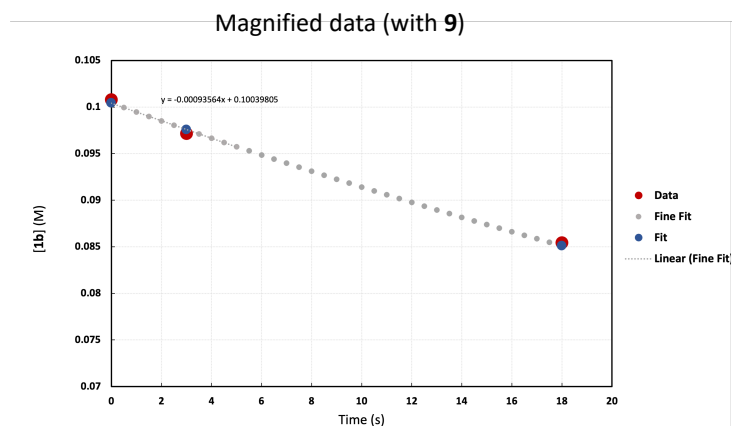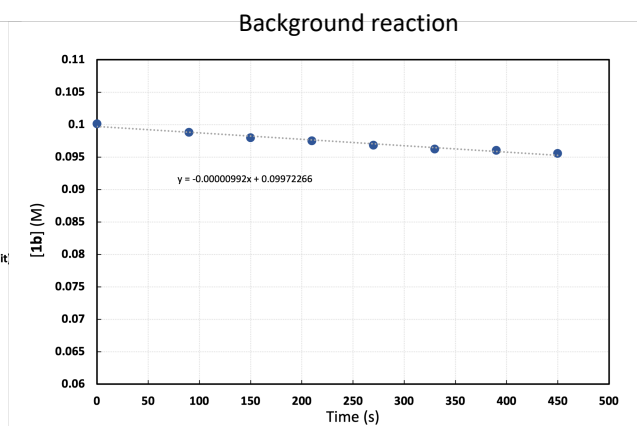

**Figure S11.** Representative concentration vs time data set for HBD kinetics experiments with polynomial curve fits (top). The first ~15% conversion for the reaction catalyzed by **9** are magnified on the bottom left, with the polynomial fit in blue and grey. The background reaction catalyzed by HCl alone is shown in the bottom right. In both cases, the first 5% conversion are fit by linear least squares approach.

*A representative dataset for the reaction catalyzed by **9** is provided below:*

| Time (s) | [1b] (M)   | Polynomial fit (M) | Rate (M/s)  |
|----------|------------|--------------------|-------------|
| 0.00     | 0.10125653 | 0.101274503        | 0.001031658 |
| 9.00     | 0.09313623 | 0.092700024        | 0.000878377 |
| 24.00    | 0.08033292 | 0.081108478        | 0.000677369 |
| 39.00    | 0.07222747 | 0.072113301        | 0.000529622 |
| 54.00    | 0.0651471  | 0.065022219        | 0.0004215   |
| 69.00    | 0.0592056  | 0.059323049        | 0.000342512 |
| 84.00    | 0.054676   | 0.054641425        | 0.000284677 |
| 99.00    | 0.05136746 | 0.050707212        | 0.000241999 |
| 114.00   | 0.04729921 | 0.047328053        | 0.00021004  |
| 129.00   | 0.04445563 | 0.044368761        | 0.000185563 |
| 144.00   | 0.0416285  | 0.041735444        | 0.000166255 |
| 159.00   | 0.03925742 | 0.039363443        | 0.000150499 |
| 174.00   | 0.03644226 | 0.03720831         | 0.00013719  |
| 189.00   | 0.0353247  | 0.035239189        | 0.0001256   |
| 204.00   | 0.03320323 | 0.033434052        | 0.000115266 |
| 219.00   | 0.03190152 | 0.031776377        | 0.000105903 |
| 234.00   | 0.03025101 | 0.030252913        | 9.73513E-05 |
| 249.00   | 0.02917788 | 0.028852232        | 8.95218E-05 |
| 264.00   | 0.0278061  | 0.027563877        | 8.23692E-05 |
| 279.00   | 0.0265934  | 0.026377901        | 7.58679E-05 |
| 294.00   | 0.02494456 | 0.025284679        | 6.99986E-05 |
| 309.00   | 0.02432219 | 0.024274893        | 6.47391E-05 |
| 324.00   | 0.02367656 | 0.023339599        | 6.00607E-05 |
| 339.00   | 0.02281947 | 0.02247035         | 5.59263E-05 |
| 354.00   | 0.02118874 | 0.021659312        | 5.22913E-05 |
| 369.00   | 0.02115267 | 0.020899366        | 4.91053E-05 |
| 384.00   | 0.0197111  | 0.02018418         | 4.63141E-05 |
| 399.00   | 0.01964034 | 0.019508243        | 4.38627E-05 |
| 414.00   | 0.01880527 | 0.018866869        | 4.16971E-05 |
| 429.00   | 0.01812119 | 0.018256155        | 3.97666E-05 |
| 444.00   | 0.01791447 | 0.017672928        | 3.80251E-05 |
| 459.00   | 0.01674453 | 0.017114659        | 3.64326E-05 |
| 474.00   | 0.01659521 | 0.016579374        | 3.49556E-05 |
| 489.00   | 0.01608706 | 0.016065548        | 3.35675E-05 |
| 504.00   | 0.01557125 | 0.015572006        | 3.22481E-05 |
| 519.00   | 0.01465427 | 0.015097832        | 3.09834E-05 |

|         |            |             |             |
|---------|------------|-------------|-------------|
| 534.00  | 0.0144984  | 0.014642274 | 2.97649E-05 |
| 549.00  | 0.01444254 | 0.014204676 | 2.85884E-05 |
| 564.00  | 0.01403872 | 0.013784413 | 2.74536E-05 |
| 579.00  | 0.01306324 | 0.013380848 | 2.63625E-05 |
| 594.00  | 0.01324795 | 0.0129933   | 2.53188E-05 |
| 609.00  | 0.01295334 | 0.012621027 | 2.43267E-05 |
| 624.00  | 0.01269285 | 0.012263218 | 2.33907E-05 |
| 639.00  | 0.01179746 | 0.011919009 | 2.25141E-05 |
| 654.00  | 0.01202814 | 0.011587486 | 2.16993E-05 |
| 669.00  | 0.0113775  | 0.011267717 | 2.09469E-05 |
| 684.00  | 0.01141018 | 0.010958771 | 2.02559E-05 |
| 699.00  | 0.01025548 | 0.010659749 | 1.96232E-05 |
| 714.00  | 0.00998894 | 0.010369808 | 1.90441E-05 |
| 729.00  | 0.00932165 | 0.010088188 | 1.85125E-05 |
| 744.00  | 0.00977477 | 0.009814234 | 1.80207E-05 |
| 759.00  | 0.00943432 | 0.00954741  | 1.75604E-05 |
| 774.00  | 0.00872177 | 0.009287308 | 1.71228E-05 |
| 789.00  | 0.00978961 | 0.009033659 | 1.66987E-05 |
| 804.00  | 0.00874009 | 0.008786324 | 1.62795E-05 |
| 819.00  | 0.00861957 | 0.008545289 | 1.58574E-05 |
| 834.00  | 0.00805871 | 0.008310651 | 1.54254E-05 |
| 849.00  | 0.00791245 | 0.008082602 | 1.49782E-05 |
| 864.00  | 0.00815015 | 0.0078614   | 1.45119E-05 |
| 879.00  | 0.00761399 | 0.00764735  | 1.40244E-05 |
| 894.00  | 0.00765764 | 0.007440775 | 1.35154E-05 |
| 909.00  | 0.00682585 | 0.007241987 | 1.29865E-05 |
| 924.00  | 0.00763531 | 0.007051263 | 1.24409E-05 |
| 939.00  | 0.00692975 | 0.00686882  | 1.18834E-05 |
| 954.00  | 0.00672466 | 0.006694791 | 1.13202E-05 |
| 969.00  | 0.0065279  | 0.006529208 | 1.07584E-05 |
| 984.00  | 0.0064184  | 0.006371992 | 1.0206E-05  |
| 999.00  | 0.00663374 | 0.006222941 | 9.67115E-06 |
| 1014.00 | 0.00578693 | 0.006081728 | 9.16224E-06 |
| 1029.00 | 0.00630017 | 0.005947905 | 8.68715E-06 |
| 1044.00 | 0.00560865 | 0.005820908 | 8.2531E-06  |
| 1059.00 | 0.00575232 | 0.005700075 | 7.86631E-06 |
| 1074.00 | 0.00489298 | 0.005584658 | 7.53171E-06 |
| 1089.00 | 0.00541375 | 0.005473845 | 7.25273E-06 |
| 1104.00 | 0.00530592 | 0.005366789 | 7.03112E-06 |
| 1119.00 | 0.00549785 | 0.005262624 | 6.86692E-06 |
| 1134.00 | 0.00515807 | 0.005160503 | 6.75837E-06 |
| 1149.00 | 0.00548881 | 0.005059612 | 6.702E-06   |



|         |            |             |             |
|---------|------------|-------------|-------------|
| 1164.00 | 0.00463304 | 0.004959207 | 6.69276E-06 |
| 1179.00 | 0.00471234 | 0.004858626 | 6.72419E-06 |
| 1194.00 | 0.00466894 | 0.004757315 | 6.78867E-06 |
| 1209.00 | 0.00470149 | 0.004654843 | 6.87771E-06 |
| 1224.00 | 0.00462995 | 0.004550906 | 6.9823E-06  |
| 1239.00 | 0.0045043  | 0.004445342 | 7.09326E-06 |
| 1254.00 | 0.00361057 | 0.004338122 | 7.20159E-06 |
| 1269.00 | 0.0042253  | 0.00422935  | 7.29885E-06 |
| 1284.00 | 0.00473058 | 0.00411925  | 7.37751E-06 |
| 1299.00 | 0.00378507 | 0.00400815  | 7.43121E-06 |
| 1314.00 | 0.00395832 | 0.003896463 | 7.45508E-06 |
| 1329.00 | 0.00413576 | 0.003784663 | 7.4459E-06  |
| 1344.00 | 0.00457859 | 0.003673258 | 7.40223E-06 |
| 1359.00 | 0.00325403 | 0.003562767 | 7.32445E-06 |
| 1374.00 | 0.00249471 | 0.003453685 | 7.21472E-06 |
| 1389.00 | 0.00378769 | 0.003346466 | 7.07687E-06 |
| 1404.00 | 0.00354119 | 0.003241493 | 6.91617E-06 |
| 1419.00 | 0.00342106 | 0.003139063 | 6.73903E-06 |
| 1434.00 | 0.00304804 | 0.003039369 | 6.55265E-06 |
| 1449.00 | 0.00237562 | 0.002942492 | 6.3646E-06  |
| 1464.00 | 0.00253563 | 0.002848401 | 6.18237E-06 |
| 1479.00 | 0.00257657 | 0.002756957 | 6.01285E-06 |
| 1494.00 | 0.00324729 | 0.002667923 | 5.86191E-06 |
| 1509.00 | 0.00241653 | 0.002580985 | 5.73391E-06 |
| 1524.00 | 0.00187639 | 0.002495778 | 5.63133E-06 |
| 1539.00 | 0.0020403  | 0.002411916 | 5.55443E-06 |
| 1554.00 | 0.00275282 | 0.002329027 | 5.50105E-06 |
| 1569.00 | 0.0022426  | 0.00224679  | 5.46657E-06 |
| 1584.00 | 0.0023951  | 0.002164971 | 5.44391E-06 |
| 1599.00 | 0.00241339 | 0.00208346  | 5.42379E-06 |
| 1614.00 | 0.00209994 | 0.002002299 | 5.39518E-06 |
| 1629.00 | 0.00205448 | 0.001921708 | 5.3458E-06  |
| 1644.00 | 0.00207805 | 0.001842093 | 5.26293E-06 |
| 1659.00 | 0.00172528 | 0.001764049 | 5.13425E-06 |
| 1674.00 | 0.00168231 | 0.001688349 | 4.94889E-06 |
| 1689.00 | 0.00138327 | 0.001615908 | 4.69849E-06 |
| 1704.00 | 0.0012274  | 0.001547744 | 4.3783E-06  |
| 1719.00 | 0.00127072 | 0.00148491  | 3.98823E-06 |
| 1734.00 | 0.00141165 | 0.00142842  | 3.53381E-06 |
| 1749.00 | 0.00157472 | 0.001379159 | 3.02688E-06 |
| 1764.00 | 0.00117958 | 0.001337784 | 2.48601E-06 |
| 1779.00 | 0.0011426  | 0.001304623 | 1.93649E-06 |

|         |            |             |             |
|---------|------------|-------------|-------------|
| 1794.00 | 0.00167898 | 0.001279576 | 1.40982E-06 |
| 1809.00 | 0.00162021 | 0.001262032 | 9.42622E-07 |
| 1824.00 | 0.00117512 | 0.001250801 | 5.74841E-07 |
| 1839.00 | 0.00111876 | 0.001244085 | 3.47239E-07 |
| 1854.00 | 0.00102922 | 0.00123949  | 2.98156E-07 |
| 1869.00 | 0.00143925 | 0.001234087 | 4.5956E-07  |
| 1884.00 | 0.00138019 | 0.001224543 | 8.52518E-07 |
| 1899.00 | 0.00060613 | 0.001207323 | 1.48229E-06 |
| 1914.00 | 0.0013201  | 0.001178964 | 2.33332E-06 |
| 1929.00 | 0.00132212 | 0.001136417 | 3.36468E-06 |
| 1944.00 | 0.00083293 | 0.001077466 | 4.5065E-06  |

A representative dataset for the reaction catalyzed by **6b** is provided below:

| Time (s) | [1b] (M)   | Polynomial fit (M) | Rate (M/s)  |
|----------|------------|--------------------|-------------|
| 0.00     | 0.10489338 | 0.105383009        | 0.000585397 |
| 10.00    | 0.10060566 | 0.09985822         | 0.000521078 |
| 25.00    | 0.09243488 | 0.092670173        | 0.000440201 |
| 40.00    | 0.0867795  | 0.086574579        | 0.000374868 |
| 55.00    | 0.08133612 | 0.081361502        | 0.000322079 |
| 70.00    | 0.07674258 | 0.076861913        | 0.000279365 |
| 85.00    | 0.07276919 | 0.072940327        | 0.000244709 |
| 100.00   | 0.06927803 | 0.069488605        | 0.000216471 |
| 115.00   | 0.06667085 | 0.06642078         | 0.000193325 |
| 130.00   | 0.0635225  | 0.063668733        | 0.000174209 |
| 145.00   | 0.06104555 | 0.061178636        | 0.000158273 |
| 160.00   | 0.05911924 | 0.058908008        | 0.000144847 |
| 175.00   | 0.05684956 | 0.056823321        | 0.000133404 |
| 190.00   | 0.05500878 | 0.054898055        | 0.000123531 |
| 205.00   | 0.05297409 | 0.053111132        | 0.000114912 |
| 220.00   | 0.05166959 | 0.051445674        | 0.000107301 |
| 235.00   | 0.05035437 | 0.04988801         | 0.000100512 |
| 250.00   | 0.04878618 | 0.048426917        | 9.44042E-05 |
| 265.00   | 0.04657724 | 0.047053017        | 8.88706E-05 |
| 280.00   | 0.04563031 | 0.045758338        | 8.383E-05   |
| 295.00   | 0.04416938 | 0.044535964        | 7.92207E-05 |
| 310.00   | 0.04274398 | 0.043379799        | 7.49952E-05 |
| 325.00   | 0.04214278 | 0.042284381        | 7.11155E-05 |
| 340.00   | 0.04202605 | 0.041244759        | 6.75509E-05 |
| 355.00   | 0.04003315 | 0.040256411        | 6.4275E-05  |
| 370.00   | 0.03903956 | 0.039315184        | 6.12644E-05 |
| 385.00   | 0.03892394 | 0.038417258        | 5.84979E-05 |
| 400.00   | 0.03757097 | 0.037559127        | 5.59552E-05 |

|         |            |             |             |
|---------|------------|-------------|-------------|
| 415.00  | 0.03670539 | 0.036737582 | 5.36167E-05 |
| 430.00  | 0.03602479 | 0.035949701 | 5.14635E-05 |
| 445.00  | 0.03529656 | 0.035192844 | 4.94772E-05 |
| 460.00  | 0.03445382 | 0.03446464  | 4.764E-05   |
| 475.00  | 0.03416883 | 0.033762984 | 4.59348E-05 |
| 490.00  | 0.03333069 | 0.033086018 | 4.43454E-05 |
| 505.00  | 0.03199011 | 0.03243212  | 4.28566E-05 |
| 520.00  | 0.0310677  | 0.031799888 | 4.14545E-05 |
| 535.00  | 0.03127567 | 0.031188116 | 4.01264E-05 |
| 550.00  | 0.03031606 | 0.030595781 | 3.88612E-05 |
| 565.00  | 0.03056317 | 0.030022014 | 3.76492E-05 |
| 580.00  | 0.029687   | 0.029466081 | 3.6482E-05  |
| 595.00  | 0.02873311 | 0.028927361 | 3.53532E-05 |
| 610.00  | 0.02830924 | 0.028405322 | 3.42572E-05 |
| 625.00  | 0.02769689 | 0.027899501 | 3.31902E-05 |
| 640.00  | 0.02791015 | 0.027409484 | 3.21496E-05 |
| 655.00  | 0.0271861  | 0.026934889 | 3.11337E-05 |
| 670.00  | 0.02641928 | 0.026475352 | 3.01419E-05 |
| 685.00  | 0.02568881 | 0.02603051  | 2.91745E-05 |
| 700.00  | 0.0258536  | 0.025599992 | 2.82321E-05 |
| 715.00  | 0.02504722 | 0.025183413 | 2.73163E-05 |
| 730.00  | 0.02443014 | 0.024780363 | 2.64286E-05 |
| 745.00  | 0.0244867  | 0.024390406 | 2.55708E-05 |
| 760.00  | 0.0238412  | 0.02401308  | 2.47448E-05 |
| 775.00  | 0.02414598 | 0.023647894 | 2.39524E-05 |
| 790.00  | 0.02305864 | 0.023294331 | 2.31952E-05 |
| 805.00  | 0.02282978 | 0.022951854 | 2.24745E-05 |
| 820.00  | 0.02236788 | 0.022619908 | 2.17913E-05 |
| 835.00  | 0.02216465 | 0.022297925 | 2.11461E-05 |
| 850.00  | 0.02183048 | 0.021985334 | 2.0539E-05  |
| 865.00  | 0.02221744 | 0.021681565 | 1.99698E-05 |
| 880.00  | 0.02175331 | 0.021386056 | 1.94375E-05 |
| 895.00  | 0.02109138 | 0.021098261 | 1.8941E-05  |
| 910.00  | 0.02072169 | 0.020817655 | 1.84786E-05 |
| 925.00  | 0.02063407 | 0.020543741 | 1.80484E-05 |
| 940.00  | 0.02066778 | 0.020276055 | 1.76479E-05 |
| 955.00  | 0.02002772 | 0.020014169 | 1.72746E-05 |
| 970.00  | 0.01979551 | 0.019757696 | 1.69256E-05 |
| 985.00  | 0.01896587 | 0.019506293 | 1.65981E-05 |
| 1000.00 | 0.01899833 | 0.01925966  | 1.62891E-05 |
| 1015.00 | 0.01866806 | 0.019017544 | 1.59954E-05 |
| 1030.00 | 0.01908692 | 0.018779735 | 1.57143E-05 |

|         |            |             |             |
|---------|------------|-------------|-------------|
| 1045.00 | 0.0183527  | 0.018546066 | 1.54429E-05 |
| 1060.00 | 0.01846664 | 0.018316411 | 1.51787E-05 |
| 1075.00 | 0.018218   | 0.018090681 | 1.49192E-05 |
| 1090.00 | 0.01792269 | 0.017868821 | 1.46624E-05 |
| 1105.00 | 0.0176044  | 0.017650804 | 1.44065E-05 |
| 1120.00 | 0.01792241 | 0.017436629 | 1.415E-05   |
| 1135.00 | 0.01708971 | 0.017226312 | 1.38919E-05 |
| 1150.00 | 0.01673395 | 0.017019883 | 1.36314E-05 |
| 1165.00 | 0.01672531 | 0.016817382 | 1.33682E-05 |
| 1180.00 | 0.0168777  | 0.016618851 | 1.31022E-05 |
| 1195.00 | 0.01626466 | 0.016424328 | 1.28337E-05 |
| 1210.00 | 0.01648809 | 0.016233849 | 1.25633E-05 |
| 1225.00 | 0.01557278 | 0.016047435 | 1.22918E-05 |
| 1240.00 | 0.01573743 | 0.015865094 | 1.20203E-05 |
| 1255.00 | 0.01577796 | 0.01568682  | 1.175E-05   |
| 1270.00 | 0.0158178  | 0.015512582 | 1.14822E-05 |
| 1285.00 | 0.01503023 | 0.015342332 | 1.12185E-05 |
| 1300.00 | 0.01533835 | 0.015175999 | 1.09603E-05 |
| 1315.00 | 0.01524516 | 0.01501349  | 1.07089E-05 |
| 1330.00 | 0.01468979 | 0.01485469  | 1.04659E-05 |
| 1345.00 | 0.01503803 | 0.014699466 | 1.02324E-05 |
| 1360.00 | 0.01459256 | 0.014547666 | 1.00095E-05 |
| 1375.00 | 0.01405251 | 0.014399123 | 9.7982E-06  |
| 1390.00 | 0.01432484 | 0.014253659 | 9.59914E-06 |
| 1405.00 | 0.01461178 | 0.014111086 | 9.41276E-06 |
| 1420.00 | 0.0134899  | 0.013971212 | 9.23924E-06 |
| 1435.00 | 0.01430826 | 0.013833844 | 9.07848E-06 |
| 1450.00 | 0.01347388 | 0.013698795 | 8.93011E-06 |
| 1465.00 | 0.01319432 | 0.013565882 | 8.7935E-06  |
| 1480.00 | 0.01343056 | 0.013434936 | 8.66776E-06 |
| 1495.00 | 0.01332957 | 0.013305801 | 8.55176E-06 |
| 1510.00 | 0.01269285 | 0.013178341 | 8.44419E-06 |
| 1525.00 | 0.01320825 | 0.01305244  | 8.34354E-06 |
| 1540.00 | 0.01323806 | 0.012928008 | 8.24821E-06 |
| 1555.00 | 0.0129727  | 0.012804976 | 8.15649E-06 |
| 1570.00 | 0.01237373 | 0.012683304 | 8.06663E-06 |
| 1585.00 | 0.01266736 | 0.012562976 | 7.97692E-06 |
| 1600.00 | 0.01186725 | 0.012444004 | 7.88569E-06 |
| 1615.00 | 0.01268784 | 0.012326421 | 7.7914E-06  |
| 1630.00 | 0.01256025 | 0.012210284 | 7.69268E-06 |
| 1645.00 | 0.01219738 | 0.012095668 | 7.58835E-06 |
| 1660.00 | 0.01216841 | 0.011982666 | 7.47751E-06 |

|         |            |             |             |
|---------|------------|-------------|-------------|
| 1675.00 | 0.01172225 | 0.011871379 | 7.35953E-06 |
| 1690.00 | 0.0118621  | 0.011761917 | 7.23411E-06 |
| 1705.00 | 0.01136858 | 0.011654393 | 7.10129E-06 |
| 1720.00 | 0.01180429 | 0.011548913 | 6.96146E-06 |
| 1735.00 | 0.01115862 | 0.01144558  | 6.81537E-06 |
| 1750.00 | 0.01123828 | 0.011344478 | 6.66413E-06 |
| 1765.00 | 0.0112922  | 0.011245675 | 6.50916E-06 |
| 1780.00 | 0.01129104 | 0.011149213 | 6.35221E-06 |
| 1795.00 | 0.01114874 | 0.011055109 | 6.19528E-06 |
| 1810.00 | 0.01097349 | 0.010963344 | 6.04061E-06 |
| 1825.00 | 0.01069831 | 0.010873867 | 5.89059E-06 |
| 1840.00 | 0.01055875 | 0.01078659  | 5.74771E-06 |
| 1855.00 | 0.01069018 | 0.010701387 | 5.61447E-06 |
| 1870.00 | 0.01084648 | 0.010618095 | 5.49334E-06 |
| 1885.00 | 0.01082615 | 0.010536515 | 5.38663E-06 |
| 1900.00 | 0.01046851 | 0.010456414 | 5.29642E-06 |
| 1915.00 | 0.0105212  | 0.010377531 | 5.22451E-06 |
| 1930.00 | 0.00962674 | 0.01029958  | 5.17228E-06 |
| 1945.00 | 0.01042605 | 0.010222259 | 5.14065E-06 |
| 1960.00 | 0.01012165 | 0.010145256 | 5.13001E-06 |
| 1975.00 | 0.01032707 | 0.010068255 | 5.14013E-06 |
| 1990.00 | 0.00959096 | 0.009990952 | 5.17014E-06 |
| 2005.00 | 0.01019159 | 0.009913059 | 5.21849E-06 |
| 2020.00 | 0.00997349 | 0.009834317 | 5.28294E-06 |
| 2035.00 | 0.00955949 | 0.009754505 | 5.36054E-06 |
| 2050.00 | 0.0098576  | 0.009673453 | 5.44771E-06 |
| 2065.00 | 0.0091403  | 0.009591047 | 5.54021E-06 |
| 2080.00 | 0.00997309 | 0.009507244 | 5.63331E-06 |
| 2095.00 | 0.00924233 | 0.009422071 | 5.72179E-06 |
| 2110.00 | 0.00937007 | 0.00933564  | 5.80015E-06 |
| 2125.00 | 0.00895387 | 0.009248146 | 5.8627E-06  |
| 2140.00 | 0.00927183 | 0.009159867 | 5.90375E-06 |
| 2155.00 | 0.00903517 | 0.009071168 | 5.9178E-06  |
| 2170.00 | 0.00876961 | 0.008982494 | 5.89974E-06 |
| 2185.00 | 0.00900768 | 0.008894359 | 5.84508E-06 |
| 2200.00 | 0.00850539 | 0.008807343 | 5.75015E-06 |
| 2215.00 | 0.00880138 | 0.008722069 | 5.61235E-06 |
| 2230.00 | 0.00933835 | 0.008639193 | 5.43036E-06 |
| 2245.00 | 0.00887422 | 0.008559379 | 5.20433E-06 |
| 2260.00 | 0.00850476 | 0.008483275 | 4.93609E-06 |
| 2275.00 | 0.00852669 | 0.008411489 | 4.62927E-06 |
| 2290.00 | 0.00775657 | 0.008344562 | 4.28939E-06 |

|         |            |             |             |
|---------|------------|-------------|-------------|
| 2305.00 | 0.00862332 | 0.008282936 | 3.92394E-06 |
| 2320.00 | 0.00853335 | 0.008226925 | 3.54233E-06 |
| 2335.00 | 0.00760453 | 0.008176691 | 3.15578E-06 |
| 2350.00 | 0.00792464 | 0.008132212 | 2.77715E-06 |
| 2365.00 | 0.00792967 | 0.008093266 | 2.42063E-06 |
| 2380.00 | 0.0081581  | 0.008059408 | 2.10131E-06 |
| 2395.00 | 0.00777278 | 0.008029964 | 1.83469E-06 |
| 2410.00 | 0.007665   | 0.008004027 | 1.636E-06   |
| 2425.00 | 0.00813034 | 0.007980472 | 1.51943E-06 |
| 2440.00 | 0.00829171 | 0.007957972 | 1.49721E-06 |
| 2455.00 | 0.00831684 | 0.007935038 | 1.57859E-06 |
| 2470.00 | 0.00754524 | 0.00791007  | 1.76872E-06 |
| 2485.00 | 0.00823039 | 0.007881432 | 2.06736E-06 |
| 2500.00 | 0.00811511 | 0.007847539 | 2.4677E-06  |
| 2515.00 | 0.00784393 | 0.007806965 | 2.95494E-06 |
| 2530.00 | 0.00723194 | 0.007758575 | 3.50507E-06 |

*A representative dataset for the reaction catalyzed by HCl in the absence of **9** is provided below:*

| <b>Time (s)</b> | <b>[1b] (M)</b> |
|-----------------|-----------------|
| 0.00            | 0.10011083      |
| 90.00           | 0.0988022       |
| 150.00          | 0.09798301      |
| 210.00          | 0.09748475      |
| 270.00          | 0.09683466      |
| 330.00          | 0.09624613      |
| 390.00          | 0.09601783      |
| 450.00          | 0.09555189      |
| 510.00          | 0.09476668      |
| 570.00          | 0.09442583      |
| 630.00          | 0.09375233      |
| 690.00          | 0.09350717      |
| 750.00          | 0.09278131      |
| 810.00          | 0.09264508      |
| 870.00          | 0.09234726      |
| 930.00          | 0.09185667      |
| 990.00          | 0.09135172      |
| 1050.00         | 0.09128695      |
| 1110.00         | 0.09052988      |
| 1170.00         | 0.09044602      |
| 1230.00         | 0.08998217      |
| 1290.00         | 0.08981293      |

|         |            |
|---------|------------|
| 1350.00 | 0.0894867  |
| 1410.00 | 0.08929545 |
| 1470.00 | 0.08853475 |
| 1530.00 | 0.0885133  |
| 1590.00 | 0.08825045 |
| 1650.00 | 0.08732191 |
| 1710.00 | 0.08758824 |
| 1770.00 | 0.08750662 |
| 1830.00 | 0.08697618 |
| 1890.00 | 0.08646371 |
| 1950.00 | 0.08650634 |
| 2010.00 | 0.08599359 |
| 2070.00 | 0.08567586 |
| 2130.00 | 0.08547012 |
| 2190.00 | 0.08529433 |
| 2250.00 | 0.0849915  |
| 2310.00 | 0.08471249 |
| 2370.00 | 0.0844268  |
| 2430.00 | 0.08416548 |
| 2490.00 | 0.08403733 |
| 2550.00 | 0.08380666 |
| 2610.00 | 0.08321201 |
| 2670.00 | 0.08351149 |
| 2730.00 | 0.08326187 |
| 2790.00 | 0.08279802 |
| 2850.00 | 0.08272238 |
| 2910.00 | 0.08250146 |
| 2970.00 | 0.08208511 |
| 3030.00 | 0.08229071 |
| 3090.00 | 0.08181919 |
| 3150.00 | 0.08158783 |
| 3210.00 | 0.0813194  |
| 3270.00 | 0.08095556 |
| 3330.00 | 0.08093996 |

| trial               | initial rate (M/s) | rate at [1b] = 0.09 M (M/s) | 2b : 3b   | d.r. (2b) | d.r. (3b) | ee (2b) | ee (3b)             | $k_{rel}$ : 9 vs background | 9 vs 6b     |           |           |         |         |
|---------------------|--------------------|-----------------------------|-----------|-----------|-----------|---------|---------------------|-----------------------------|-------------|-----------|-----------|---------|---------|
| 2 mol% 9-Run 1      | 9.36 E-04          | 8.13 E-04                   | 3.1 : 1   | 28 : 1    | > 50 : 1  | 96%     | 98%                 | 93 ± 5                      | 2.01 ± 0.03 |           |           |         |         |
| 2 mol% 9-Run 2      | 9.80 E-04          | 8.38 E-04                   | 3.1 : 1   | 29 : 1    | > 50 : 1  | 96%     | 98%                 |                             |             |           |           |         |         |
| 2 mol% 9-Run 3      | 9.87 E-04          | 8.33 E-04                   | 3.1 : 1   | 28 : 1    | > 50 : 1  | 96%     | 98%                 |                             |             |           |           |         |         |
| -----               |                    |                             |           |           |           |         |                     |                             |             |           |           |         |         |
| Average $k_{obs}$ : | 9.67 E-04          | 8.28 E-04                   |           |           |           |         |                     |                             |             |           |           |         |         |
| Stdev.:             | 2.76 E-05          | 1.30 E-05                   |           |           |           |         |                     |                             |             |           |           |         |         |
| -----               |                    |                             |           |           |           |         |                     |                             |             |           |           |         |         |
| trial               | initial rate (M/s) | 2b : 3b                     | d.r. (2b) | d.r. (3b) | ee (2b)   | ee (3b) | trial               | rate at [1b] = 0.09 M (M/s) | 2b : 3b     | d.r. (2b) | d.r. (3b) | ee (2b) | ee (3b) |
| 0 mol% HBD-Run 1    | 1.05 E-05          | 3.3 : 1                     | 4.1 : 1   | 8.3 : 1   | —         | —       | 2 mol% 6b-Run 1     | 4.14 E-04                   | 3.7 : 1     | 34 : 1    | > 50 : 1  | 96%     | 96%     |
| 0 mol% HBD-Run 2    | 9.92 E-06          | 3.2 : 1                     | 4.1 : 1   | 9.1 : 1   | —         | —       | 2 mol% 6b-Run 2     | 4.10 E-04                   | 3.7 : 1     | 30 : 1    | > 50 : 1  | 96%     | 96%     |
| 0 mol% HBD-Run 3    | 1.08 E-05          | 3.2 : 1                     | 4.1 : 1   | 9.6 : 1   | —         | —       | -----               |                             |             |           |           |         |         |
| Average $k_{obs}$ : | 1.04 E-05          |                             |           |           |           |         | Average $k_{obs}$ : | 4.12 E-04                   |             |           |           |         |         |
| Stdev.:             | 4.28 E-07          |                             |           |           |           |         | Stdev.:             | 2.93 E-06                   |             |           |           |         |         |
| -----               |                    |                             |           |           |           |         |                     |                             |             |           |           |         |         |

Figure S12. Results of kinetics experiments measuring rates of cyclization of **1b**.

## 7. X-Ray Crystallographic Information

Crystals suitable for X-ray crystallographic analysis were obtained from a nearly saturated solution of enantioenriched **2c** in 50% DCM, 50% hexanes (v/v) which was allowed to slowly evaporate at ambient temperature over a two day period. A crystal mounted on a diffractometer was collected data at 100 K. The intensities of the reflections were collected by means of a Bruker APEX II CCD diffractometer (Mo $K\alpha$  radiation,  $\lambda=0.71073$  Å), and equipped with an Oxford Cryosystems nitrogen flow apparatus. The collection method involved 0.5° scans in  $\omega$  at 28° in  $2\theta$ . Data integration down to 0.78 Å resolution was carried out using SAINT V8.37A (Bruker diffractometer, 2016) with reflection spot size optimization. Absorption corrections were made with the program SADABS (Bruker diffractometer, 2016). The structure was solved by the Intrinsic Phasing methods and refined by least-squares methods again  $F^2$  using SHELXT-2014 (Sheldrick, 2015) and SHELXL-2014 (Sheldrick, 2015) with OLEX 2 interface (Dolomanov, et al., 2009). Non-hydrogen atoms were refined anisotropically, and hydrogen atoms were allowed to ride on the respective atoms. Crystal data as well as details of data collection and refinement are summarized in Table 1, geometric parameters are shown in Table 2, and hydrogen-bond parameters are listed in Table 3. The Ortep plots produced with SHELXL-2014 program, and the three-dimensional supramolecular architecture drawing was produced with Accelrys DS Visualizer 2.0 (Accelrys, 2007).

Table 1. Experimental details

|                             |                                                  |
|-----------------------------|--------------------------------------------------|
|                             | DAK-5-III                                        |
| Crystal data                |                                                  |
| Chemical formula            | C <sub>12</sub> H <sub>13</sub> BrO <sub>2</sub> |
| $M_r$                       | 269.13                                           |
| Crystal system, space group | Trigonal, $P3_1$                                 |
| Temperature (K)             | 100                                              |
| $a, c$ (Å)                  | 12.0964 (6), 6.6179 (3)                          |
| $V$ (Å <sup>3</sup> )       | 838.62 (9)                                       |
| $Z$                         | 3                                                |
| Radiation type              | Mo $K\alpha$                                     |
| $\mu$ (mm <sup>-1</sup> )   | 3.65                                             |
| Crystal size (mm)           | 0.08 × 0.01 × 0.01                               |
| Data collection             |                                                  |



|                                                                            |                                                                                                                                    |
|----------------------------------------------------------------------------|------------------------------------------------------------------------------------------------------------------------------------|
| Diffractometer                                                             | Bruker D8 goniometer with CCD area detector                                                                                        |
| Absorption correction                                                      | Multi-scan<br><i>SADABS</i>                                                                                                        |
| $T_{\min}, T_{\max}$                                                       | 0.526, 0.694                                                                                                                       |
| No. of measured, independent and observed [ $I > 2\sigma(I)$ ] reflections | 19872, 2472, 2327                                                                                                                  |
| $R_{\text{int}}$                                                           | 0.031                                                                                                                              |
| $(\sin \theta/\lambda)_{\text{max}}$ ( $\text{\AA}^{-1}$ )                 | 0.640                                                                                                                              |
| Refinement                                                                 |                                                                                                                                    |
| $R[F^2 > 2\sigma(F^2)], wR(F^2), S$                                        | 0.028, 0.068, 1.05                                                                                                                 |
| No. of reflections                                                         | 2472                                                                                                                               |
| No. of parameters                                                          | 141                                                                                                                                |
| No. of restraints                                                          | 1                                                                                                                                  |
| H-atom treatment                                                           | H atoms treated by a mixture of independent and constrained refinement                                                             |
| $\Delta\rho_{\text{max}}, \Delta\rho_{\text{min}}$ ( $\text{e \AA}^{-3}$ ) | 1.03, -0.49                                                                                                                        |
| Absolute structure                                                         | Flack x determined using 1102 quotients $[(I^+)-(I^-)]/[(I^+)+(I^-)]$ (Parsons, Flack and Wagner, Acta Cryst. B69 (2013) 249-259). |
| Absolute structure parameter                                               | -0.012 (3)                                                                                                                         |

Computer programs: *SAINT* 8.37A (Bruker-AXS, 2015), *SHELXT2014* (Sheldrick, 2015), *SHELXL2014* (Sheldrick, 2015), Bruker *SHELXTL* (Sheldrick, 2015).

**Table 2. Geometric parameters ( $\text{\AA}, ^\circ$ )**

|          |           |          |           |
|----------|-----------|----------|-----------|
| Br1—C3   | 1.899 (4) | C7—C8    | 1.539 (6) |
| O1—C1    | 1.361 (5) | C7—H7    | 1.0000    |
| O1—C9    | 1.444 (5) | C8—C10   | 1.518 (6) |
| O2—C7    | 1.438 (5) | C8—C9    | 1.523 (6) |
| O2—H2    | 0.69 (6)  | C8—H8    | 1.0000    |
| C1—C2    | 1.390 (6) | C9—H9A   | 0.9900    |
| C1—C6    | 1.411 (6) | C9—H9B   | 0.9900    |
| C2—C3    | 1.374 (6) | C10—C11  | 1.331 (7) |
| C2—H2A   | 0.9500    | C10—C12  | 1.506 (6) |
| C3—C4    | 1.389 (6) | C11—H11A | 0.9500    |
| C4—C5    | 1.386 (6) | C11—H11B | 0.9500    |
| C4—H4    | 0.9500    | C12—H12A | 0.9800    |
| C5—C6    | 1.394 (6) | C12—H12B | 0.9800    |
| C5—H5    | 0.9500    | C12—H12C | 0.9800    |
| C6—C7    | 1.502 (6) |          |           |
|          |           |          |           |
| C1—O1—C9 | 117.6 (3) | C8—C7—H7 | 108.1     |

|              |            |               |           |
|--------------|------------|---------------|-----------|
| C7—O2—H2     | 112 (5)    | C10—C8—C9     | 115.6 (4) |
| O1—C1—C2     | 116.2 (4)  | C10—C8—C7     | 111.8 (3) |
| O1—C1—C6     | 123.3 (3)  | C9—C8—C7      | 108.5 (3) |
| C2—C1—C6     | 120.5 (4)  | C10—C8—H8     | 106.8     |
| C3—C2—C1     | 119.5 (4)  | C9—C8—H8      | 106.8     |
| C3—C2—H2A    | 120.2      | C7—C8—H8      | 106.8     |
| C1—C2—H2A    | 120.2      | O1—C9—C8      | 113.6 (3) |
| C2—C3—C4     | 122.1 (4)  | O1—C9—H9A     | 108.8     |
| C2—C3—Br1    | 118.3 (3)  | C8—C9—H9A     | 108.8     |
| C4—C3—Br1    | 119.6 (3)  | O1—C9—H9B     | 108.8     |
| C5—C4—C3     | 117.6 (4)  | C8—C9—H9B     | 108.8     |
| C5—C4—H4     | 121.2      | H9A—C9—H9B    | 107.7     |
| C3—C4—H4     | 121.2      | C11—C10—C12   | 120.9 (4) |
| C4—C5—C6     | 122.7 (4)  | C11—C10—C8    | 124.1 (4) |
| C4—C5—H5     | 118.6      | C12—C10—C8    | 115.0 (4) |
| C6—C5—H5     | 118.6      | C10—C11—H11A  | 120.0     |
| C5—C6—C1     | 117.6 (4)  | C10—C11—H11B  | 120.0     |
| C5—C6—C7     | 122.0 (4)  | H11A—C11—H11B | 120.0     |
| C1—C6—C7     | 120.4 (4)  | C10—C12—H12A  | 109.5     |
| O2—C7—C6     | 111.2 (3)  | C10—C12—H12B  | 109.5     |
| O2—C7—C8     | 110.8 (3)  | H12A—C12—H12B | 109.5     |
| C6—C7—C8     | 110.5 (3)  | C10—C12—H12C  | 109.5     |
| O2—C7—H7     | 108.1      | H12A—C12—H12C | 109.5     |
| C6—C7—H7     | 108.1      | H12B—C12—H12C | 109.5     |
|              |            |               |           |
| C9—O1—C1—C2  | 174.0 (4)  | C5—C6—C7—O2   | -78.7 (5) |
| C9—O1—C1—C6  | -7.0 (6)   | C1—C6—C7—O2   | 100.8 (4) |
| O1—C1—C2—C3  | -178.9 (4) | C5—C6—C7—C8   | 157.8 (4) |
| C6—C1—C2—C3  | 2.2 (6)    | C1—C6—C7—C8   | -22.7 (5) |
| C1—C2—C3—C4  | -1.8 (7)   | O2—C7—C8—C10  | 156.6 (3) |
| C1—C2—C3—Br1 | 177.6 (3)  | C6—C7—C8—C10  | -79.6 (4) |
| C2—C3—C4—C5  | 0.6 (7)    | O2—C7—C8—C9   | -74.8 (4) |
| Br1—C3—C4—C5 | -178.8 (3) | C6—C7—C8—C9   | 49.0 (4)  |
| C3—C4—C5—C6  | 0.2 (7)    | C1—O1—C9—C8   | 36.9 (5)  |
| C4—C5—C6—C1  | 0.2 (6)    | C10—C8—C9—O1  | 68.5 (5)  |
| C4—C5—C6—C7  | 179.7 (4)  | C7—C8—C9—O1   | -58.0 (4) |
| O1—C1—C6—C5  | 179.8 (4)  | C9—C8—C10—C11 | -19.3 (6) |
| C2—C1—C6—C5  | -1.4 (6)   | C7—C8—C10—C11 | 105.4 (5) |
| O1—C1—C6—C7  | 0.2 (6)    | C9—C8—C10—C12 | 162.1 (4) |
| C2—C1—C6—C7  | 179.1 (4)  | C7—C8—C10—C12 | -73.1 (5) |

**Table 3. Hydrogen-bond parameters**

| $D-H\cdots A$      | $D-H$ (Å) | $H\cdots A$ (Å) | $D\cdots A$ (Å) | $D-H\cdots A$ (°) |
|--------------------|-----------|-----------------|-----------------|-------------------|
| $O2-H2\cdots O2^i$ | 0.69 (6)  | 2.01 (6)        | 2.689 (3)       | 169 (6)           |

Symmetry code(s): (i)  $-y+1, x-y, z+1/3$ .

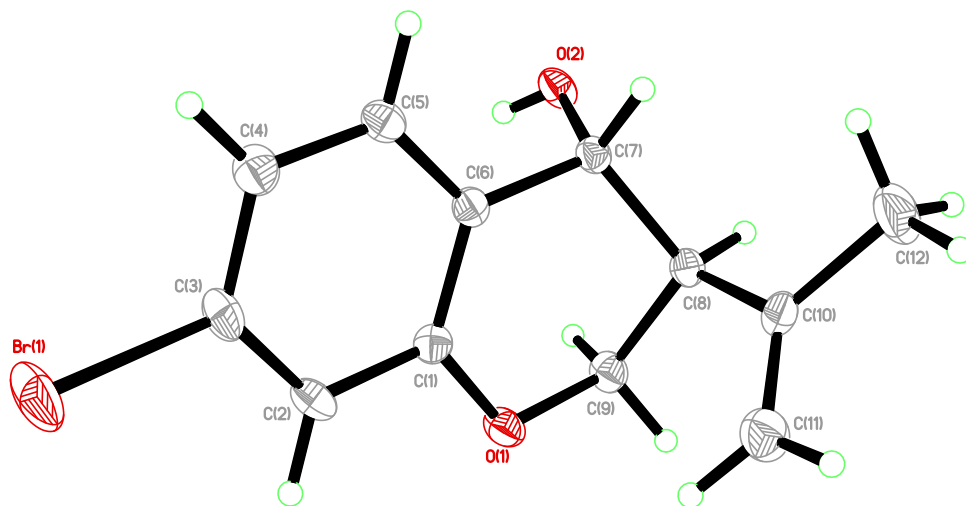

Perspective views showing 50% probability displacement

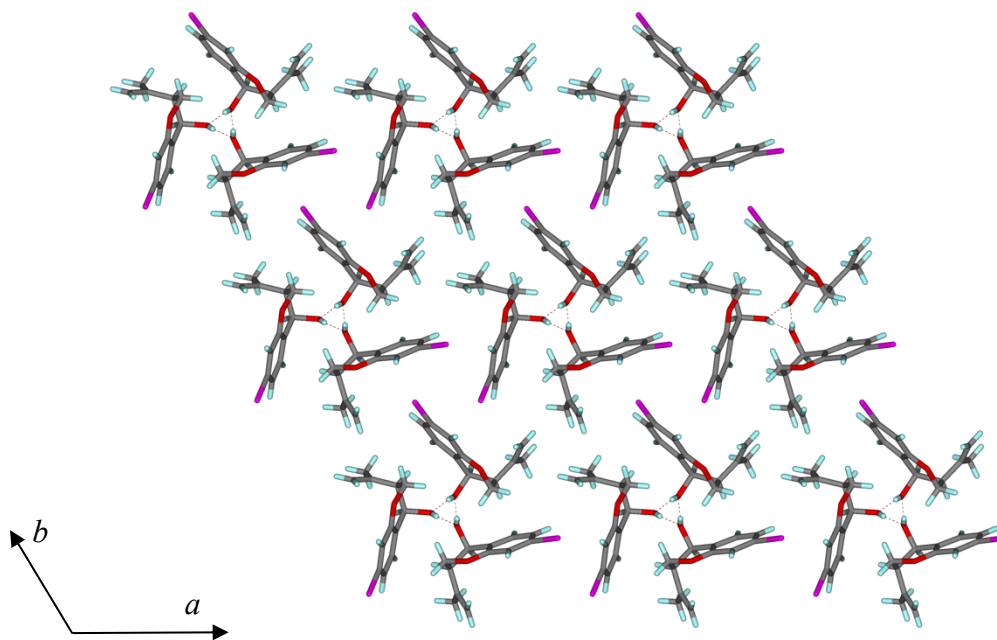

Three-dimensional supramolecular architecture viewed along the  $c$ -axis direction.

**Crystallographic References:**

- [1] Bruker AXS APEX3, Bruker AXS, Madison, Wisconsin, 2016.
- [2] O. V. Dolomanov, L. J. Bourhis, R. J. Gildea, J. A. K. Howard and H. Puschmann *J. Appl. Cryst.* 2009, 42, 339-341
- [3] G. M. Sheldrick, *Acta Cryst.* 2015, A71, 3-8.
- [4] G. M. Sheldrick, *Acta Cryst.* 2015, C71, 3-8.
- [5] Accelrys DS Visualizer v2.0.1, Accelrys Software, Inc., 2007.

## 8. Additional Reaction Optimization Data

### 8.1 Pyrrole degradation studies

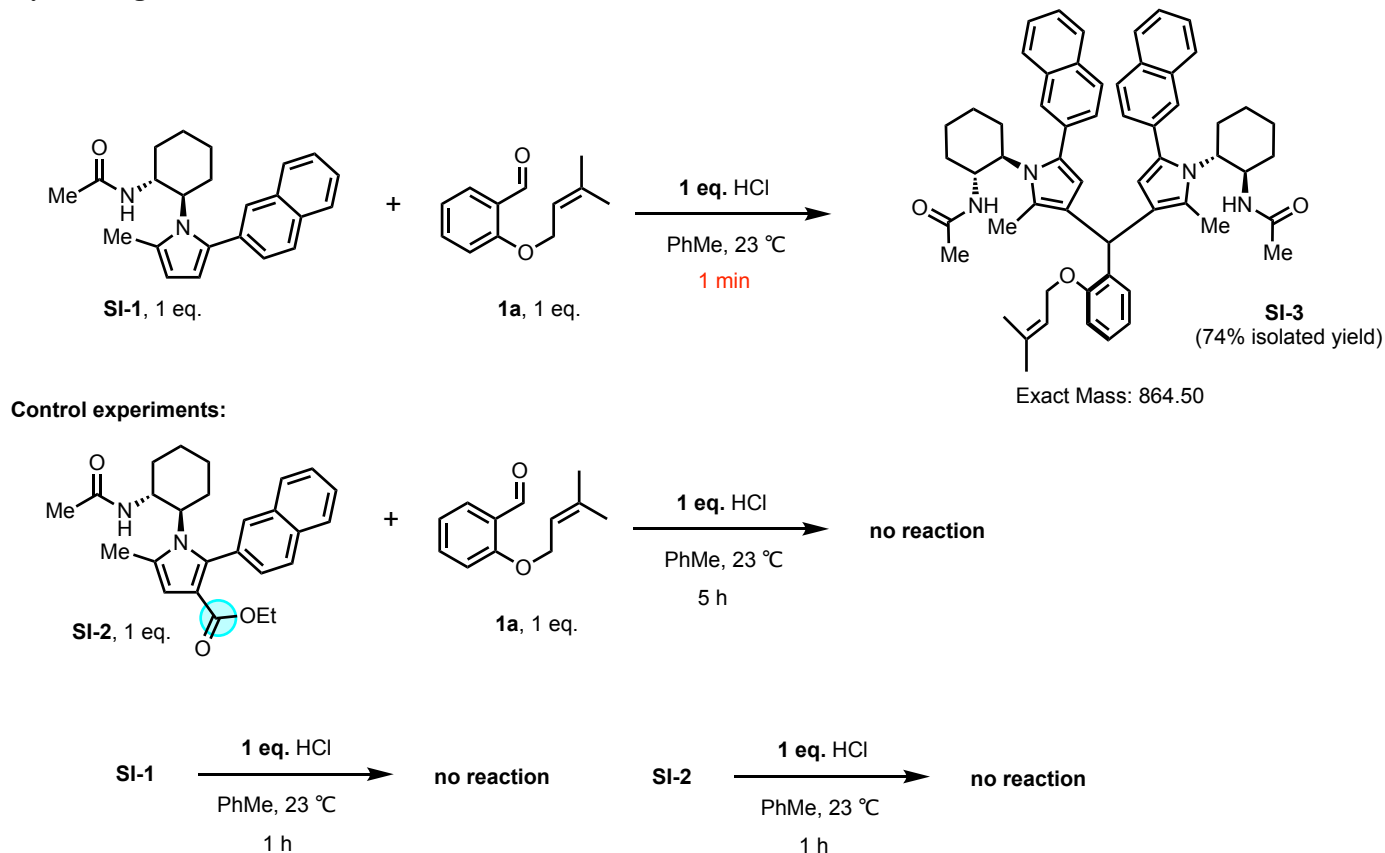

Pyrrole-bearing catalysts such as **5** were found to be unstable under the reaction conditions used in the HCl-promoted Prins reaction of **1a**. To more directly probe the origin of this instability, we synthesized simplified acetylated analogs **SI-1** and **SI-2**, and subjected them to treatment with combinations of HCl and **1a**. Reaction conditions: 0.015 mmol **SI-1** and 0.015 mmol **1a** were weighed into a flame dried 1-dram vial charged with a magnetic stir bar. 1.5 mL of anhydrous toluene were added, followed by 0.015 mmol of HCl (2.17 M in Et<sub>2</sub>O). Upon addition of HCl, an immediate color change from faint yellow to dark orange was noted. TLC analysis (80% EtOAc/Hexanes, v/v) indicated full consumption of **SI-1** after 1 minute, and after this period 0.03 mmol triethylamine were added. The crude reaction was loaded directly onto a silica gel column eluting with 90% EtOAc/10% Hexanes (v/v) to purify dimeric adduct **SI-3** (0.048 g, light red solid, 74% yield) which was characterized by a combination of NMR spectroscopy and HR-MS (data shown below). Control experiments conducted using the same conditions established that ester derivative **SI-2** does not undergo the analogous addition reaction or engage in any other promiscuous behavior. Finally, **SI-1** and **SI-2** were each found to be stable to HCl alone.

Characterization data for **SI-3**:

**<sup>1</sup>H NMR:** (400 MHz, CDCl<sub>3</sub>) δ 7.83 (m, 6H), 7.76 (s, 1H), 7.66 (s, 1H), 7.48 (m, 6H), 7.38 (d, *J* = 8.5 Hz, 1H), 7.18 (d, *J* = 7.5 Hz, 1H), 7.09 (td, *J* = 7.7, 1.7 Hz, 1H), 6.83 (m, 2H), 6.07 (m, 2H), 5.60 (s, 1H), 5.49 (m, 1H), 4.79 (m, 1H), 4.69 (m, 1H), 4.53 (m, 1H), 4.44 (m, 1H), 4.20 (m, 2H), 4.04 (m, 2H), 2.34 (m, 13H), 1.91 (bs, 2H), 1.81 (s, 4H), 1.71 (m, 6H), 1.29 (m, 8H), 0.84 (m, 3H).

**<sup>13</sup>C NMR:** (101 MHz, CDCl<sub>3</sub>) δ 169.39, 169.07, 155.84, 136.84, 135.53, 133.93, 133.57, 132.03, 131.90, 129.04, 128.05, 127.76, 127.69, 127.63, 127.32, 126.95, 126.65, 126.42, 126.37, 126.28, 125.74, 125.66, 120.73, 120.24, 112.12, 111.24, 110.82, 65.35, 60.06, 59.98, 52.01, 33.59, 32.59, 25.95, 25.79, 24.61, 23.19, 22.90, 18.17, 12.24.

**HR-MS:** (ESI) calcd. for C<sub>58</sub>H<sub>64</sub>N<sub>4</sub>O<sub>3</sub> 865.5051 [M + H<sup>+</sup>], found 865.5046



### SI-3 HR-MS data:

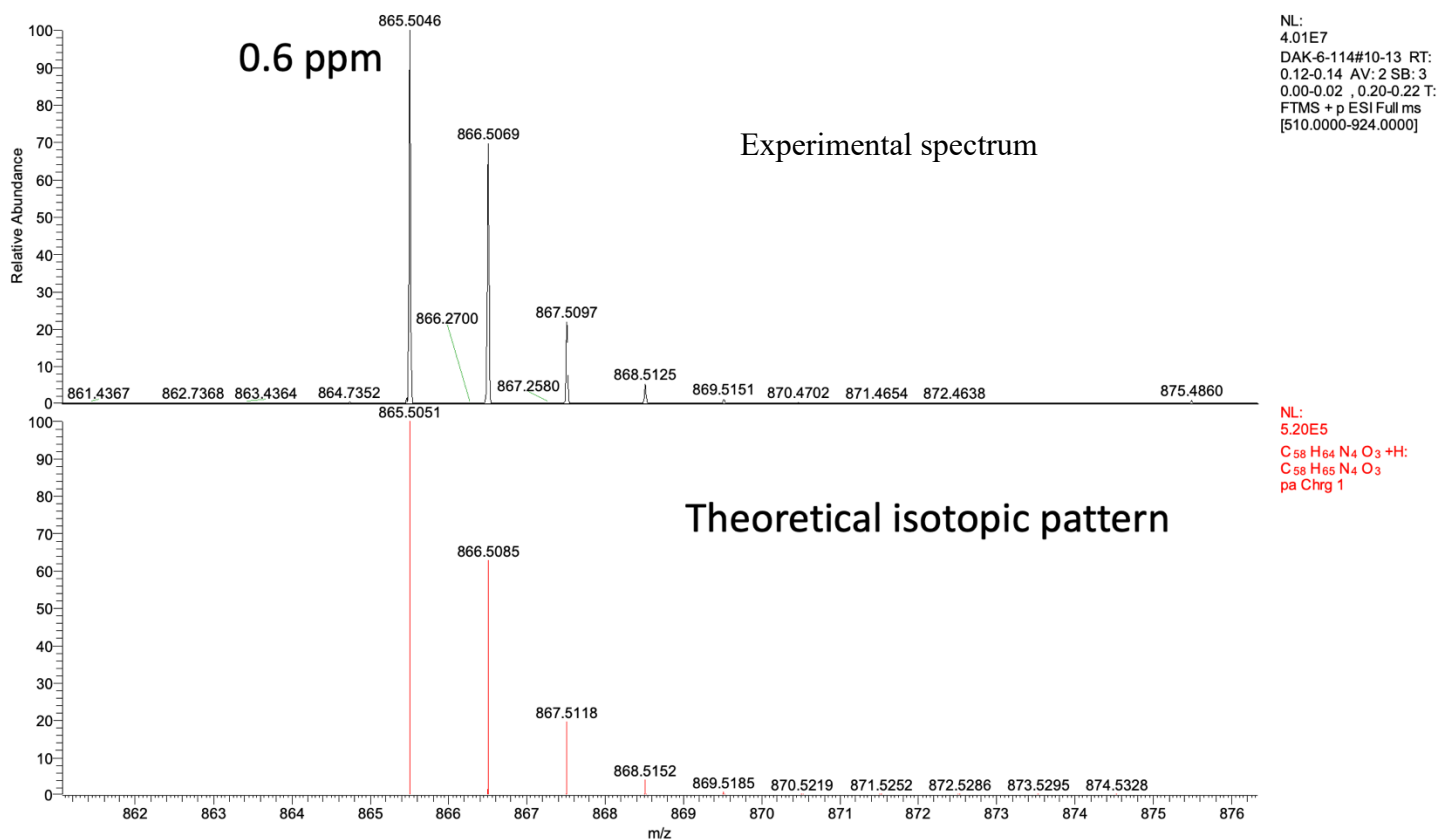

## 8.2 Edman degradation studies

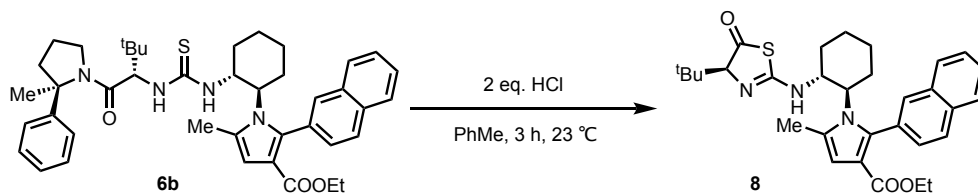

Hydrogen-bond donor catalysts **6-11** were observed to undergo Edman degradation in the presence of HCl to cleanly afford heterocycle **8** and the corresponding aryl pyrrolidine. For the purposes of isolation and characterization of the Edman product **8**, we subjected **6b** (0.050 mmol, 0.035 g) to treatment with HCl (0.010 mmol of a 2.17 M solution in Et<sub>2</sub>O, 2.0 eq.) in toluene (1.7 mL). After 3 hours at 23 °C, the reaction was observed to have proceeded to approximately 50% conversion as judged by TLC analysis (35% Et<sub>2</sub>O/Hexanes, v/v). The solvent was vaporized *in vacuo* and the resulting residue was purified by silica gel chromatography (35% Et<sub>2</sub>O in hexanes) to afford heterocycle **8** as a white solid in 32% yield (0.0086 g).

On the basis of the diagnostic carbon resonance at 207 ppm in the <sup>13</sup>C NMR corresponding to the carbon of the thioester, the structure of **8** is assigned as pictured and not as the corresponding thiohydantoin (which is the final product in certain Edman degradation protocols). It is not possible at this time to definitively assign the position of the unsaturation in the iosthiourea motif, but our tentative prediction is pictured.

Characterization data for **8**:

<sup>1</sup>H NMR: (400 MHz, CDCl<sub>3</sub>) δ 7.89 (m, 4H), 7.56 (m, 3H), 6.41 (s, 1H), 4.29 (s, 1H), 4.03 (s, 3H), 3.75 (s, 1H), 2.50 (s, 3H), 2.17 (m, 2H), 1.83 (m, 1H), 1.70 (m, 1H), 1.35 (m, 2H), 0.99 (m, 12H), 0.87 (m, 2H).

**<sup>13</sup>C NMR:** (101 MHz, CDCl<sub>3</sub>) δ 207.01, 164.56, 152.23, 139.44, 139.14, 132.99, 131.00, 130.79, 130.44, 129.24, 129.11, 128.32, 128.17, 127.90, 127.80, 127.71, 127.39, 126.53, 126.40, 126.28, 125.49, 112.95, 111.09, 89.33, 88.70, 61.08, 60.90, 59.05, 53.91, 52.79, 37.14, 37.02, 34.04, 33.63, 33.52, 31.90, 31.68, 30.89, 30.29, 29.67, 26.65, 26.48, 25.40, 24.72, 24.64, 22.66, 15.24, 14.09, 14.03.

**HR-MS:** (ESI) calcd. for C<sub>31</sub>H<sub>37</sub>N<sub>3</sub>O<sub>3</sub>S 532.2628 [M + H<sup>+</sup>], found 532.2618

<sup>1</sup>H NMR, CDCl<sub>3</sub>, 400 MHz

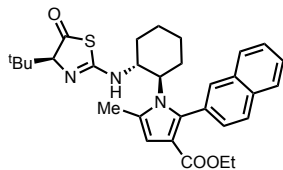

**8**

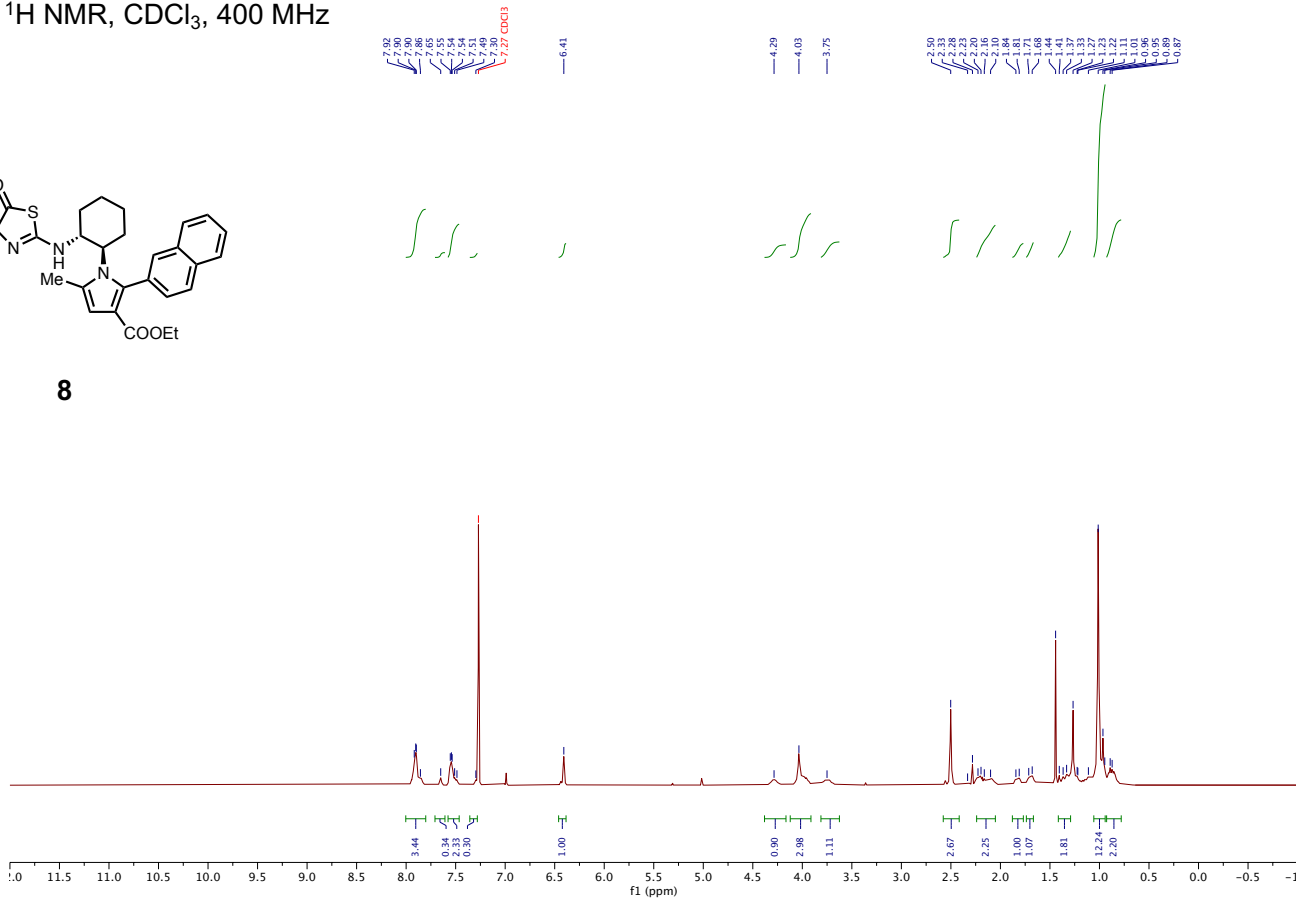

<sup>13</sup>C NMR, CDCl<sub>3</sub>, 101 MHz

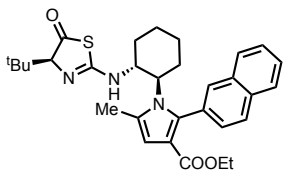

**8**

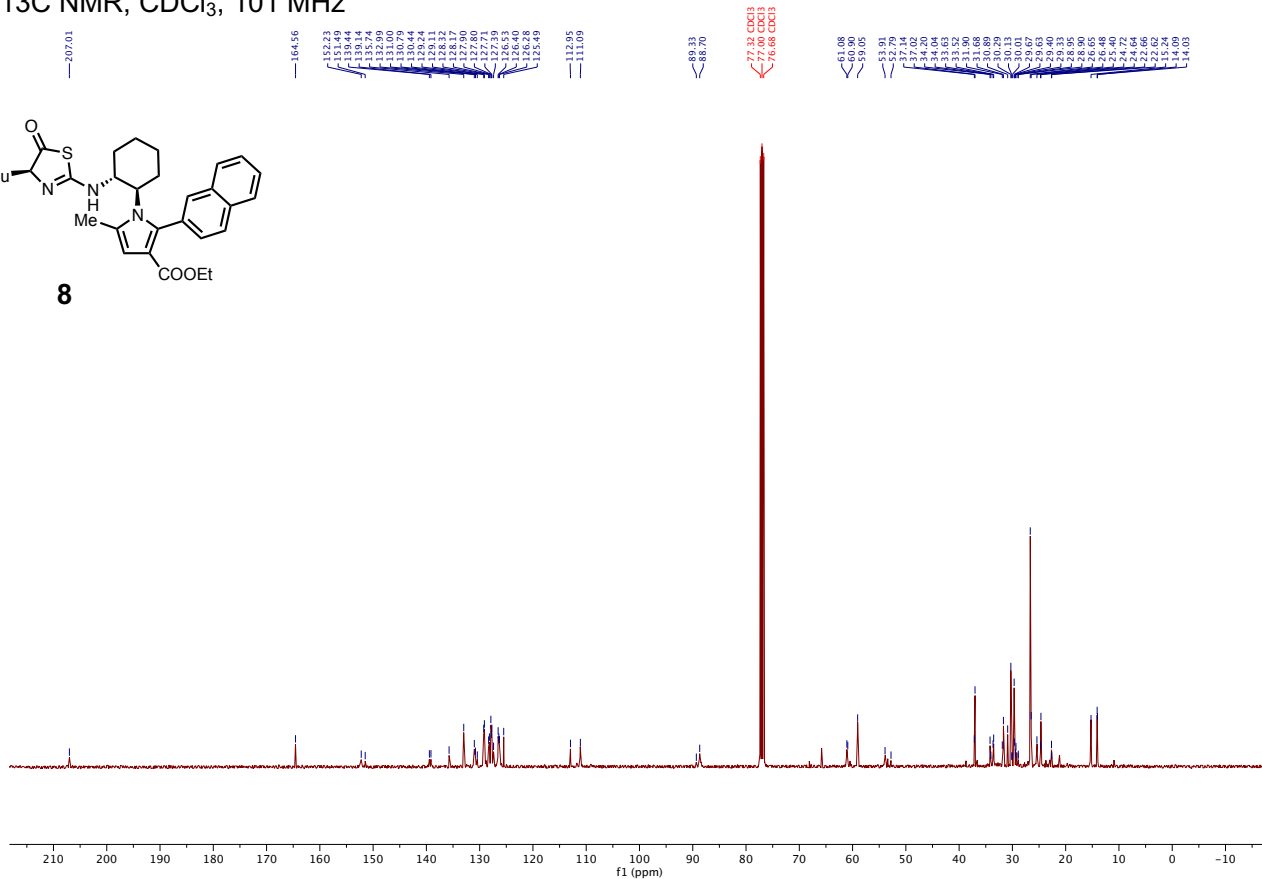



## 8 HR-MS data:

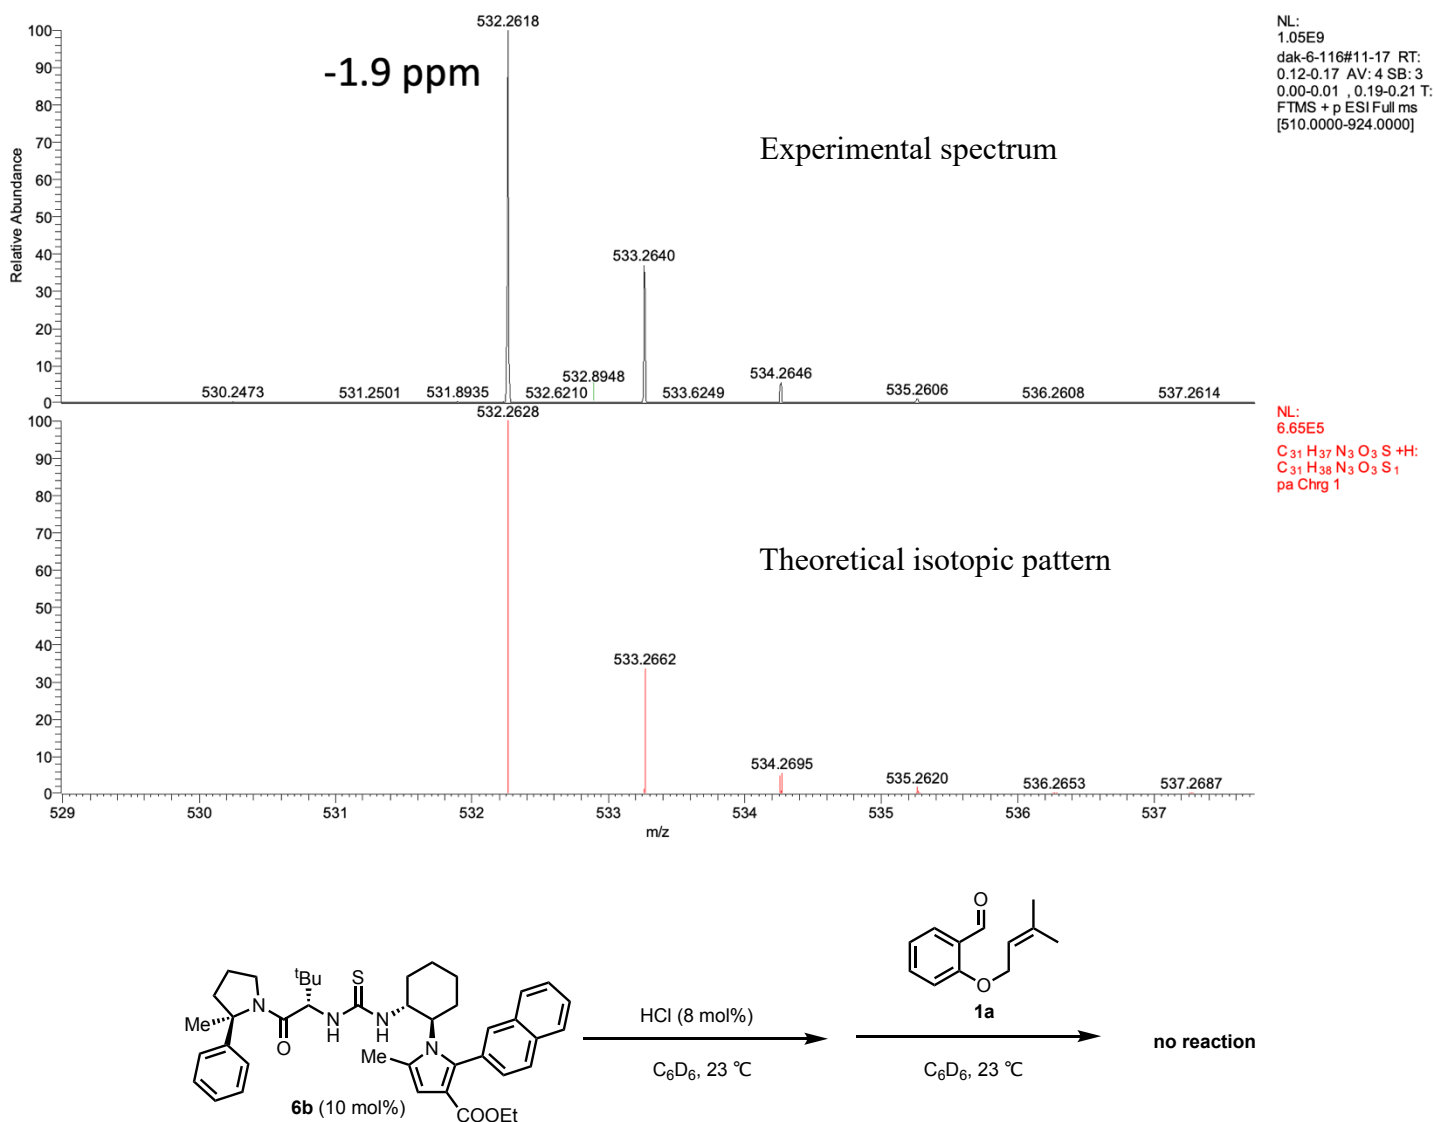

**Figure S13.** Assessing potential catalytic activity of Edman decomposition products

The possibility that the products of Edman degradation (heterocycle **8** or the aryl pyrrolidine) could be catalytically active in the Prins reaction was tested by first incubating HBD catalyst **6b** (0.006 mmol, 10 mol%) with HCl (0.0048 mol, 8 mol%) in 300  $\mu$ L of  $C_6D_6$  for 15 hours at 23 °C. Incubation was carried out in a vial sealed with electrical tape to prevent any volume changes. After this time, **6b** was observed to have degraded to the corresponding Edman product as judged by TLC analysis (35% Et<sub>2</sub>O/Hexanes, v/v). Then, a 300  $\mu$ L stock solution of substrate **1a** (0.06 mmol) in  $C_6D_6$  was added, along with mesitylene internal standard (6  $\mu$ L). After 1 hour, no reaction of **1a** was observed to have taken place by <sup>1</sup>H NMR analysis of the crude reaction mixture. Only unreacted starting material **1a** was observed. By comparison, the analogous experiment in which HCl is added last proceeds to 33% conversion in 1 hour. This result indicates that the Edman decomposition products are not catalytically active in the Prins reaction.

## 8.3 Optimization of HCl slow release methods

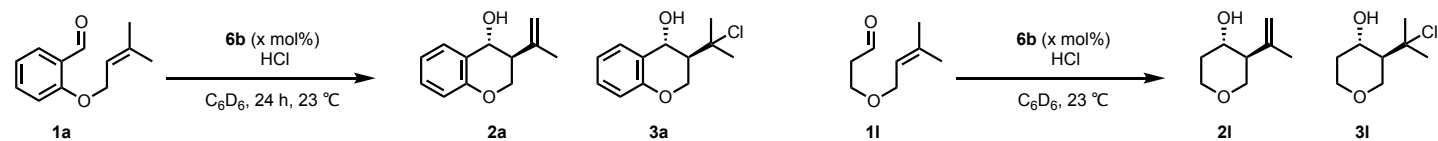

| entry | "HCl"<br>(mol%)  | 6b<br>(mol%) | conversion<br>(%) | 2a : 3a | ee 2a<br>(%) | ee 3a<br>(%) |
|-------|------------------|--------------|-------------------|---------|--------------|--------------|
| 1     | HCl (15)         | 10           | 65                | 3.1 : 1 | 97           | 98           |
| 2     | HCl (20)         | 10           | 80                | 3.0 : 1 | 97           | 98           |
| 3     | HCl (30)         | 10           | 96                | 3.1 : 1 | 96           | 98           |
| 4     | HCl (30)         | 5            | 88                | 3.1 : 1 | 92           | 94           |
| 5*    | AcCl + EtOH (30) | 10           | 95                | 3.0 : 1 | 97           | 98           |
| 6     | AcCl + EtOH (30) | 5            | 93                | 3.0 : 1 | 95           | 97           |

\*4h reaction time

| entry | "HCl"<br>(mol%)  | 6b<br>(mol%) | time<br>(hr.) | conversion<br>(%) | ee 2l<br>(%) |
|-------|------------------|--------------|---------------|-------------------|--------------|
| 1     | HCl (30)         | 10           | 1             | >95               | 89           |
| 2     | HCl (30)         | 5            | 1             | >95               | 85           |
| 3     | AcCl + EtOH (30) | 10           | 1             | >95               | 91           |
| 4     | AcCl + EtOH (30) | 5            | 4             | >95               | 89           |

**Figure S14.** Comparison of HCl and AcCl-based HCl slow-release methods.

While the use of 30 mol% HCl loadings with substrates **1a** and **1l** were found to result in highly enantioenriched products, we found that 1:1 combinations of AcCl and EtOH produced cyclized products in higher ee.

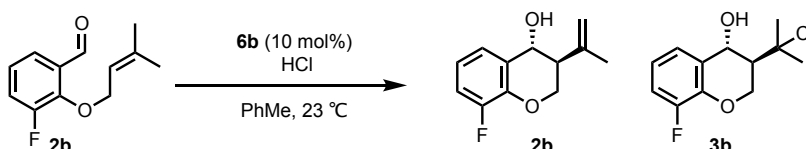

| entry | "HCl"<br>(mol%)                                       | 6b<br>(mol%) | time<br>(hr.) | conversion<br>(%) | 2a : 3a | ee 2a<br>(%) | ee 3a<br>(%) |
|-------|-------------------------------------------------------|--------------|---------------|-------------------|---------|--------------|--------------|
| 1     | 4-MeOC <sub>6</sub> H <sub>4</sub> C(O)Cl + MeOH (30) | 10           | 22            | 25                | 3.8 : 1 | 98           | 99           |
| 2     | C <sub>6</sub> H <sub>5</sub> C(O)Cl + MeOH (30)      | 10           | 22            | 42                | 3.7 : 1 | 98           | 99           |
| 3     | 4-Cl-C <sub>6</sub> H <sub>4</sub> C(O)Cl + MeOH (30) | 10           | 22            | 63                | 3.7 : 1 | 98           | 99           |

**Figure S15.** Comparison of HCl slow-release methods

Although the use of various benzoyl chloride derivatives lead to the formation of highly enantioenriched products, these reactions were found to be inconveniently slow compared to the reaction performed with AcCl and EtOH.

#### 8.4 Optimization of KHMDS quench

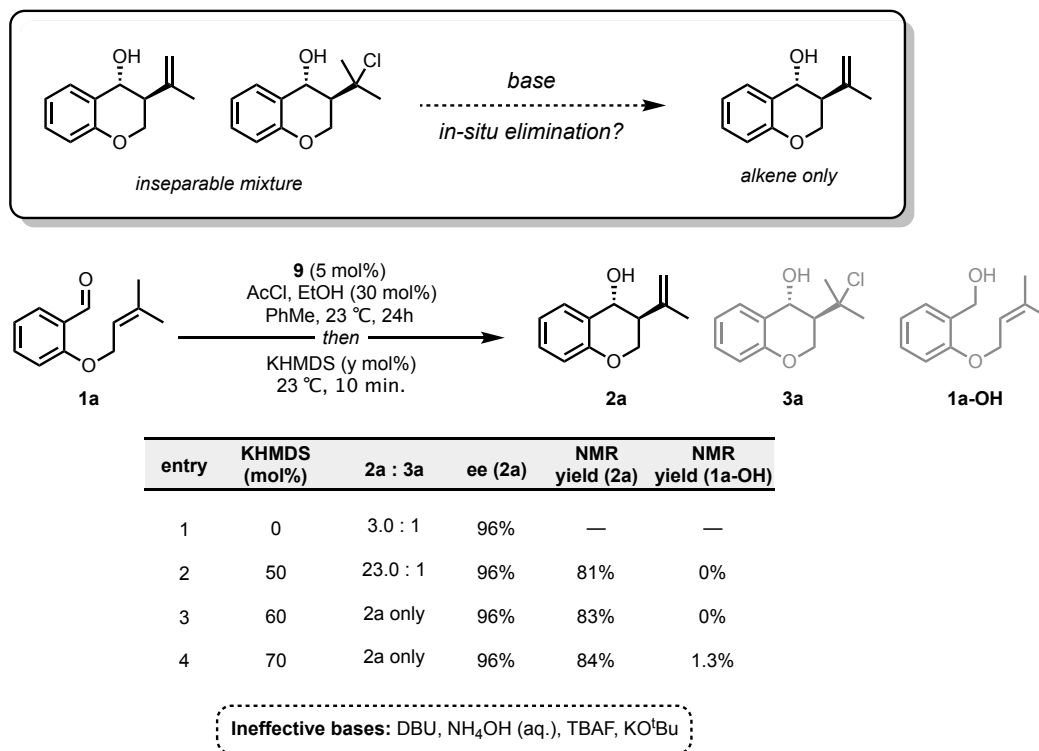

**Figure S16.** Screen of KHMDS loadings.

A series of bases were surveyed for a quench to promote elimination of **3a** to the corresponding alkene product, **2a**, with KHMDS (as a 1 M solution in THF) proving optimal. Importantly, compounds **2** and **3** were found to be inseparable by conventional column chromatography, which necessitated the development of conditions that would work for mixtures of the two compounds. In control experiments, subjecting purified mixtures of **2a** and **3a** to treatment with KHMDS resulted in full conversion of **3a** within 10 minutes as observed by <sup>1</sup>H NMR. The appropriate amount of KHMDS to use as a quench at the end of the reaction involving HBD catalyst, AcCl, and EtOH was determined empirically as there are a number of acidic species in solution that could undergo deprotonation in the presence of strong base. Note: all reactions in the above figure were taken to >95% conversion of **1a** before addition of KHMDS. Reactions were carried out using 0.05 mmol of **1a** according to general procedure B (section 4.1) with reactions quenched by the addition of KHMDS (1 M solution in THF) and subsequently passed through a short plug of SiO<sub>2</sub> eluting with Et<sub>2</sub>O prior to analysis.

For a 5 mol% loading of catalyst **9**, the optimal quench was determined to be 60 mol% KHMDS which resulted in full conversion of **3a** to form a mixture of **2a** and **1a**. Using the lowest loadings of KHMDS possible is desirable, as excess KHMDS leads to the formation of small amounts of Cannizzaro product (**1a-OH**) derived from reduction of the reformed **1a** starting material (see below). **1a-OH** was found to be separable from **2a** using 10% silver nitrate on silica gel eluting with 50% (Et<sub>2</sub>O/Hexanes) (v/v). The Cannizzaro reaction was found to be relevant only for aromatic substrates **1a-1j**.

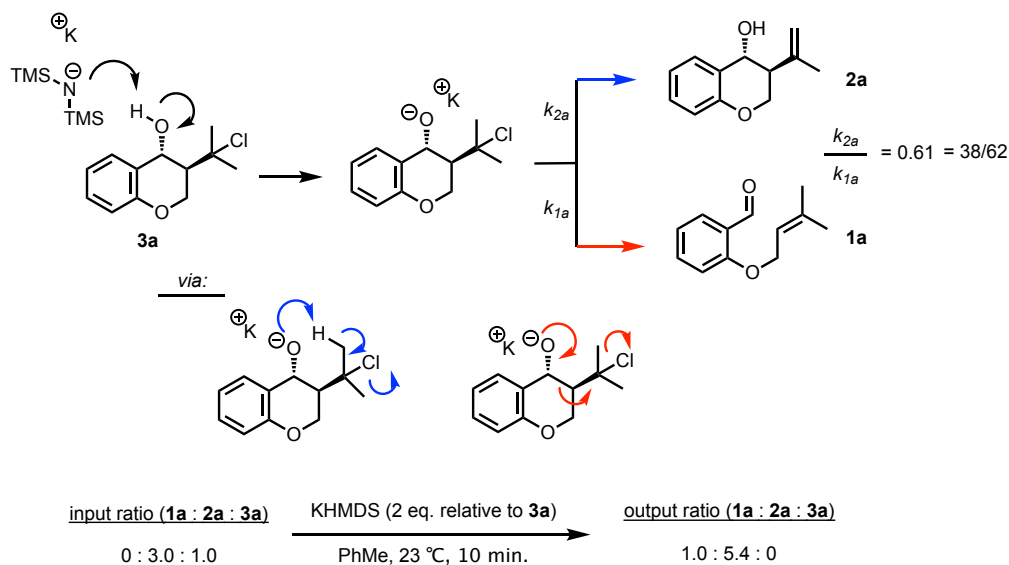

**Figure S17.** Partitioning of **3a** upon exposure to KHMDS.

It was found that KHMDS promotes elimination of **3a** to form **2a**, but also induces substantial intramolecular elimination of **3a** to reform starting material **1a**. To determine the partitioning ratio of **3a**, a 3.0 : 1.0 mixture of **2a** and **3a** (0.05 mmol total) was treated with KHMDS (2.0 eq. with respect to **3a**, 25  $\mu$ L of a 1 M solution in THF) for 10 min at 23 °C in PhMe (500  $\mu$ L). After this time, the reaction was passed through a short pad of silica gel eluting with Et<sub>2</sub>O and concentrated under reduced pressure. The resulting residue was analyzed by <sup>1</sup>H NMR. No residual **3a** was observed, and the ratio **2a** : **1a** was observed to be 5.40 : 1. These data indicate that 38% of **3a** undergoes elimination to form **2a** while the remaining 62% reverts to starting material **1a**.

This ratio of products was found to be invariant with changes to the loading of base, as well as the identity of the solvent and temperature of the reaction. Hence, although full consumption of **3a** is observed, upon exposure to KHMDS, the yield of **2a** in catalytic reactions is lowered due to reformation of the starting material. Importantly, this accounts for the moderate-to-good yields of the Prins reaction (Figure 2 in the main text) even though most reactions provide near quantitative yields of the combination of homoallylic alcohol **2** and the corresponding tertiary chloride **3** products prior to KHMDS treatment.

## 8.5 Optimization of arylpyrrolidine structure

### Variable HBD loading experiments:

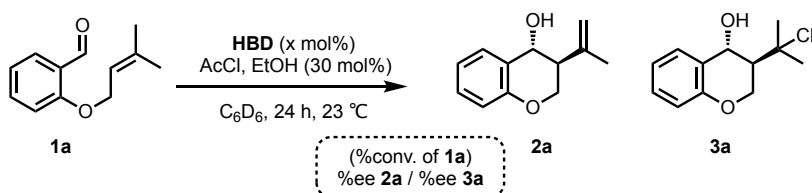

| Ar     | HBD       | x = | 1%            | 2%            | 5%             | 10%            |
|--------|-----------|-----|---------------|---------------|----------------|----------------|
| Ph     | <b>6b</b> |     | (56)<br>63/65 | (68)<br>82/84 | (93)<br>95/97  | (95)<br>97/98  |
| 2-Nap  | <b>9</b>  |     | (65)<br>80/85 | (83)<br>92/95 | (98)<br>96/98  | (96)<br>96/98  |
| 1-Nap  | <b>10</b> |     | (79)<br>78/80 | (93)<br>86/89 | (100)<br>93/95 | (100)<br>94/97 |
| 9-Phen | <b>11</b> |     | (84)<br>82/88 | (96)<br>89/95 | (100)<br>91/96 | (100)<br>92/97 |

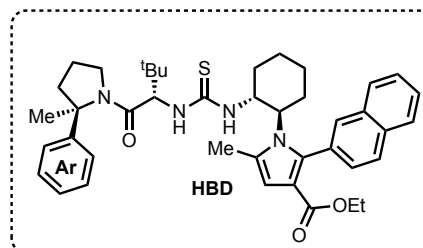

**Figure S18.** Variable HBD loading experiments. All experiments were conducted according to general procedure B (section 4.1) for 24 h except the 10 mol% experiment with **6b** which was carried out for 4 h. Although catalysts **10** and **11** provide higher conversions at low loadings compared to **9**, the 2-naphthyl substituted catalyst is the only HBD that results in highly enantioselective outcomes with loadings < 5 mol%.

### 8.6 Additional substrates

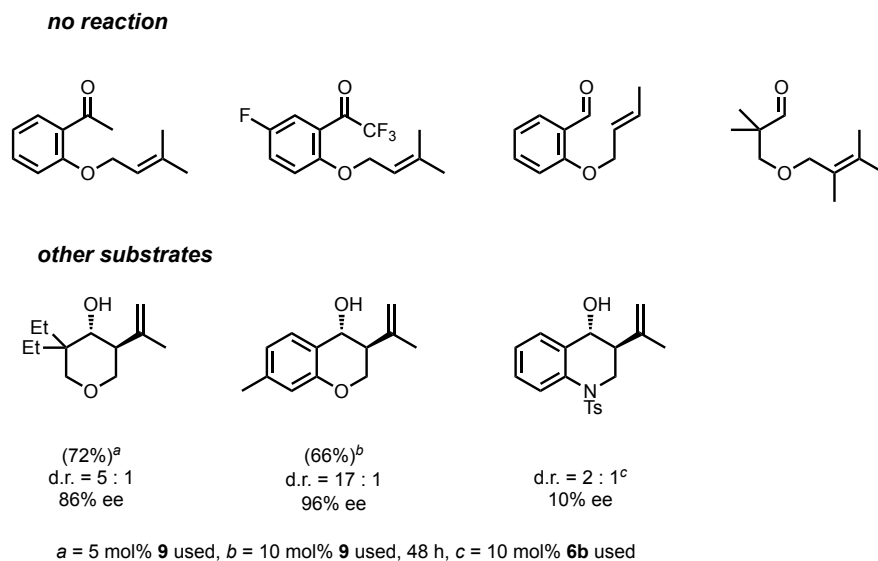

**Figure S19.** Alternative substrates. Reactions were conducted using the above substrates according to general procedures in section 4. The use of tetrasubstituted alkene nucleophiles and aldehyde electrophiles was found to be necessary for reactivity. Electron-rich arylaldehyde substrates were observed to react very slowly and although high ee could be achieved, higher HBD loadings and reaction times were required.

### 9. <sup>1</sup>H, <sup>13</sup>C, and <sup>19</sup>F NMR spectra

<sup>1</sup>H NMR, CDCl<sub>3</sub>, 400 MHz

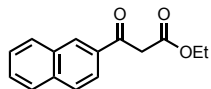

**C1**

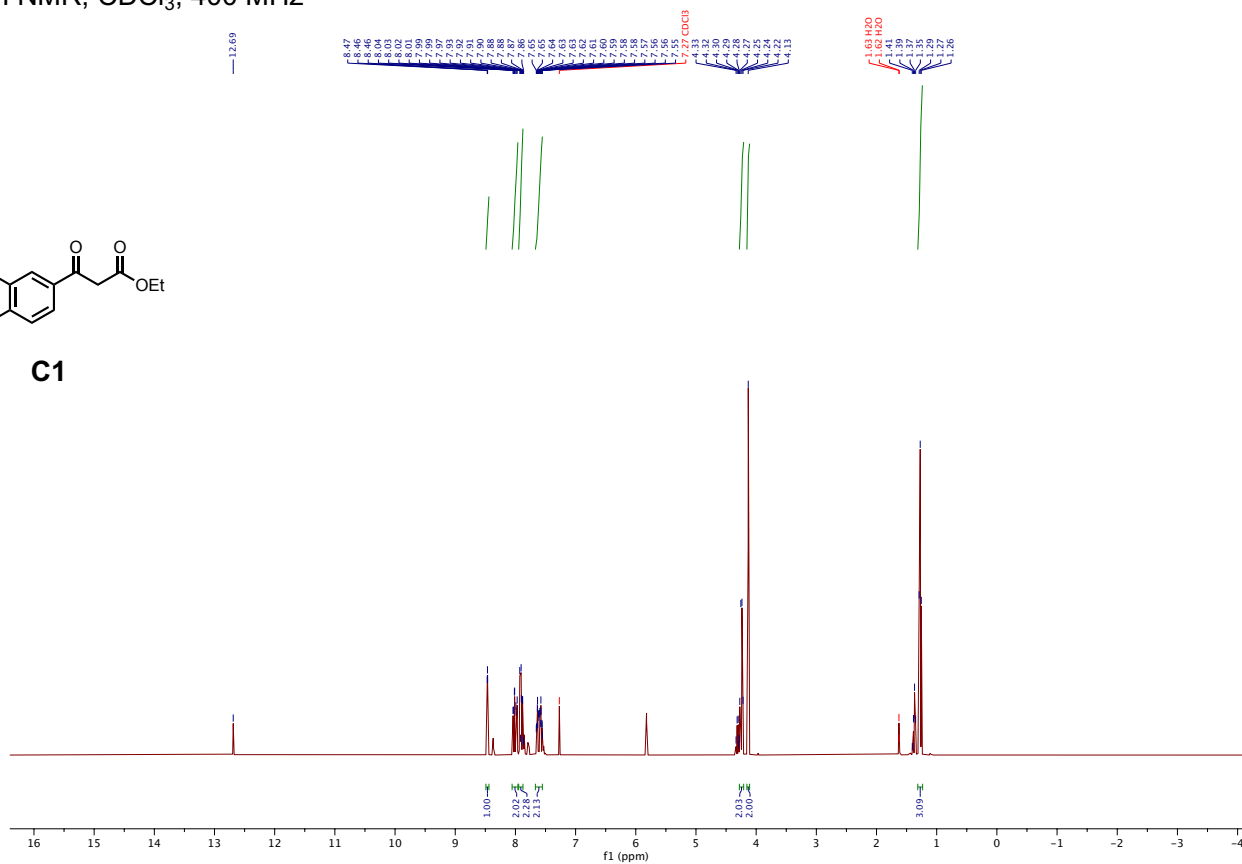

<sup>13</sup>C NMR, CDCl<sub>3</sub>, 101 MHz

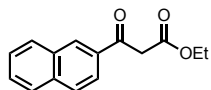

**C1**

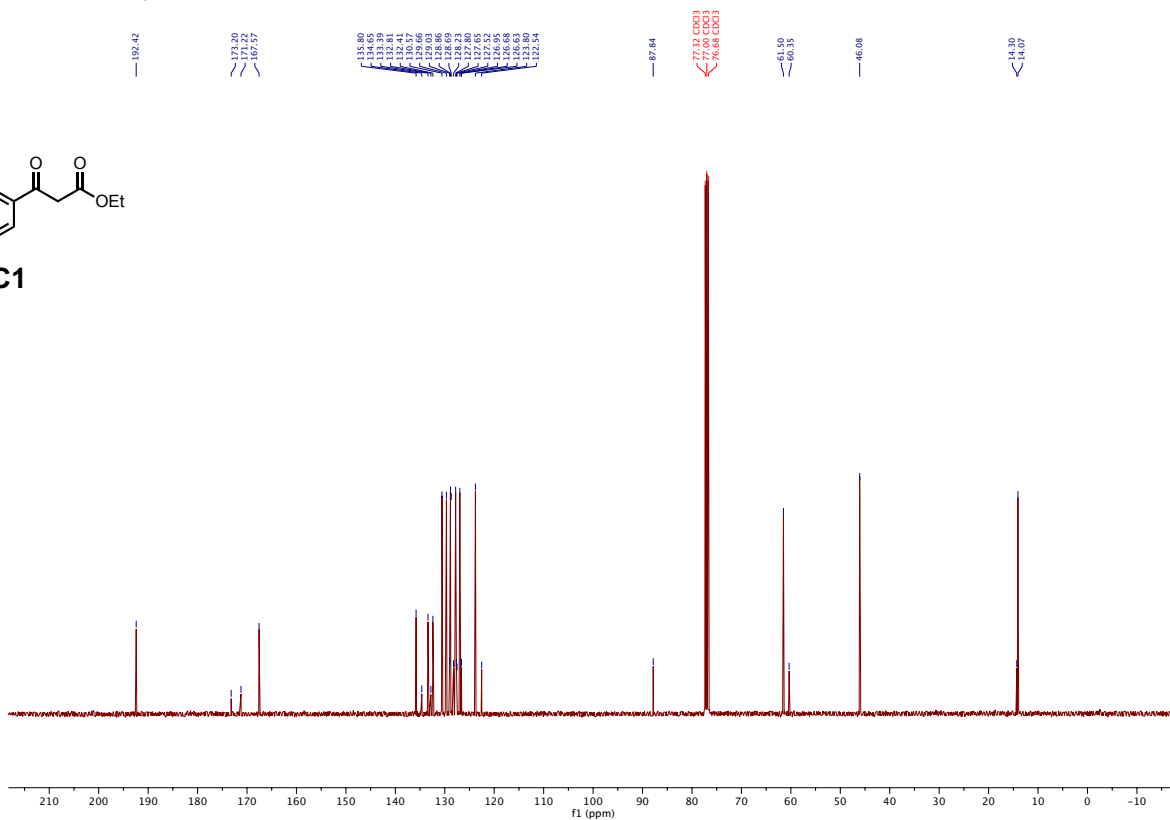

$^1\text{H}$  NMR,  $\text{CDCl}_3$ , 400 MHz

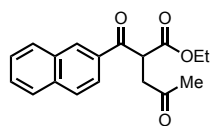

**C2**

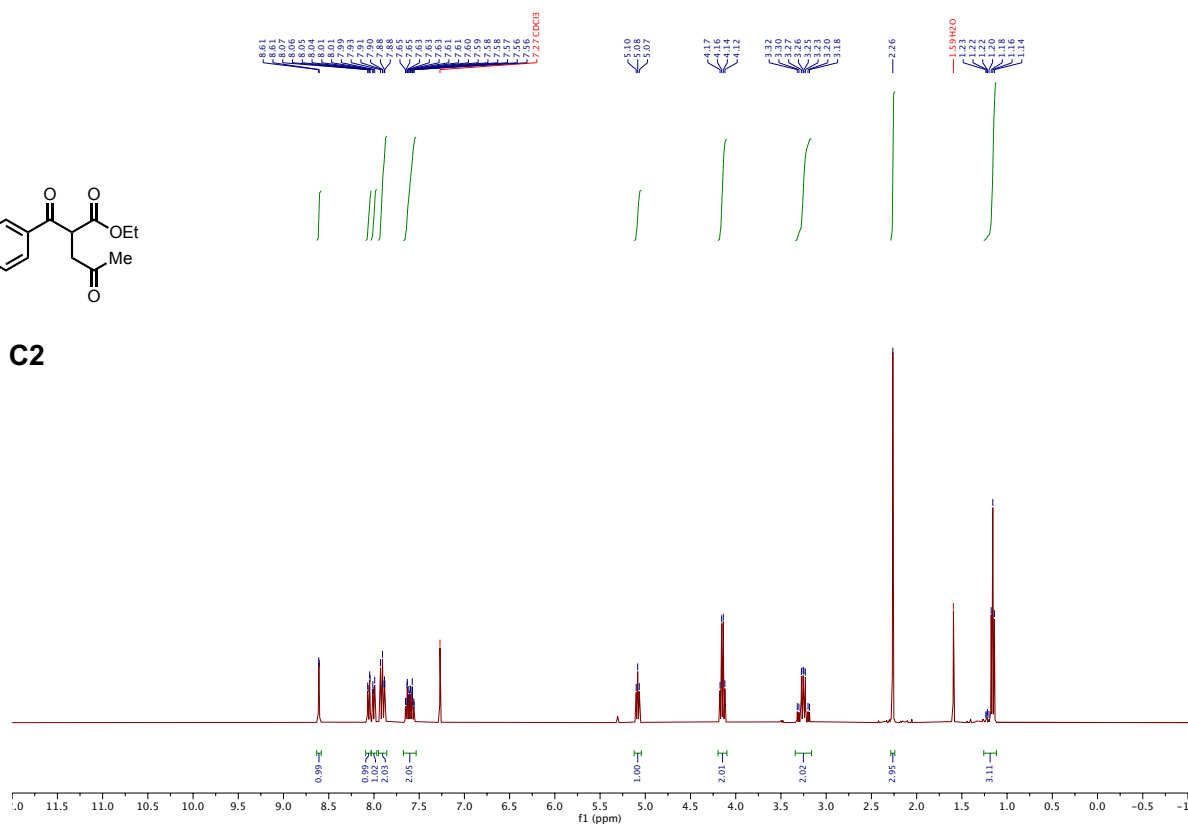

$^{13}\text{C}$  NMR,  $\text{CDCl}_3$ , 101 MHz

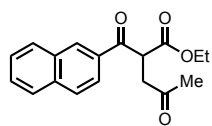

**C2**

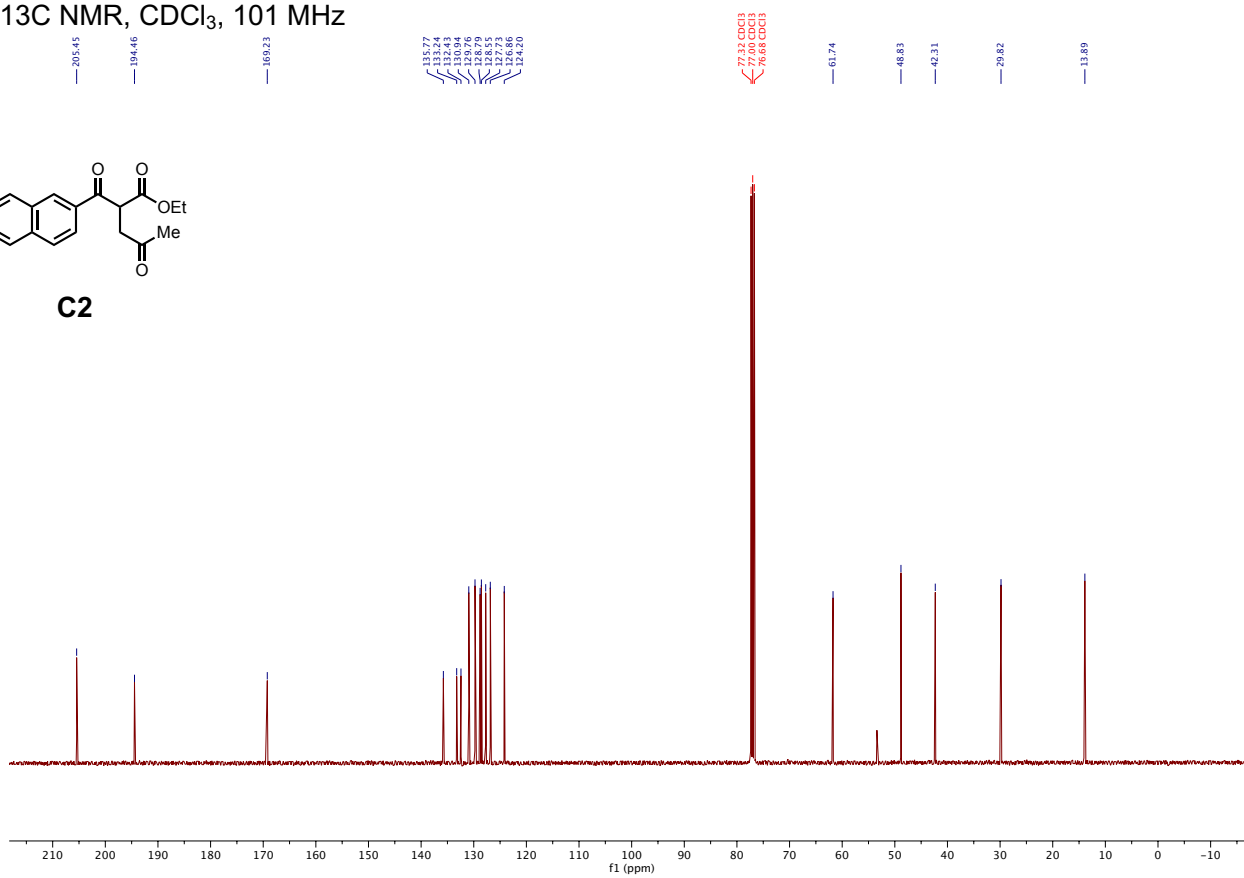

$^1\text{H}$  NMR,  $\text{CDCl}_3$ , 400 MHz

4:1 rotameric ratio

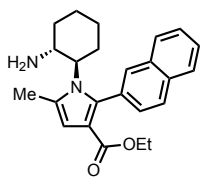

**C3**

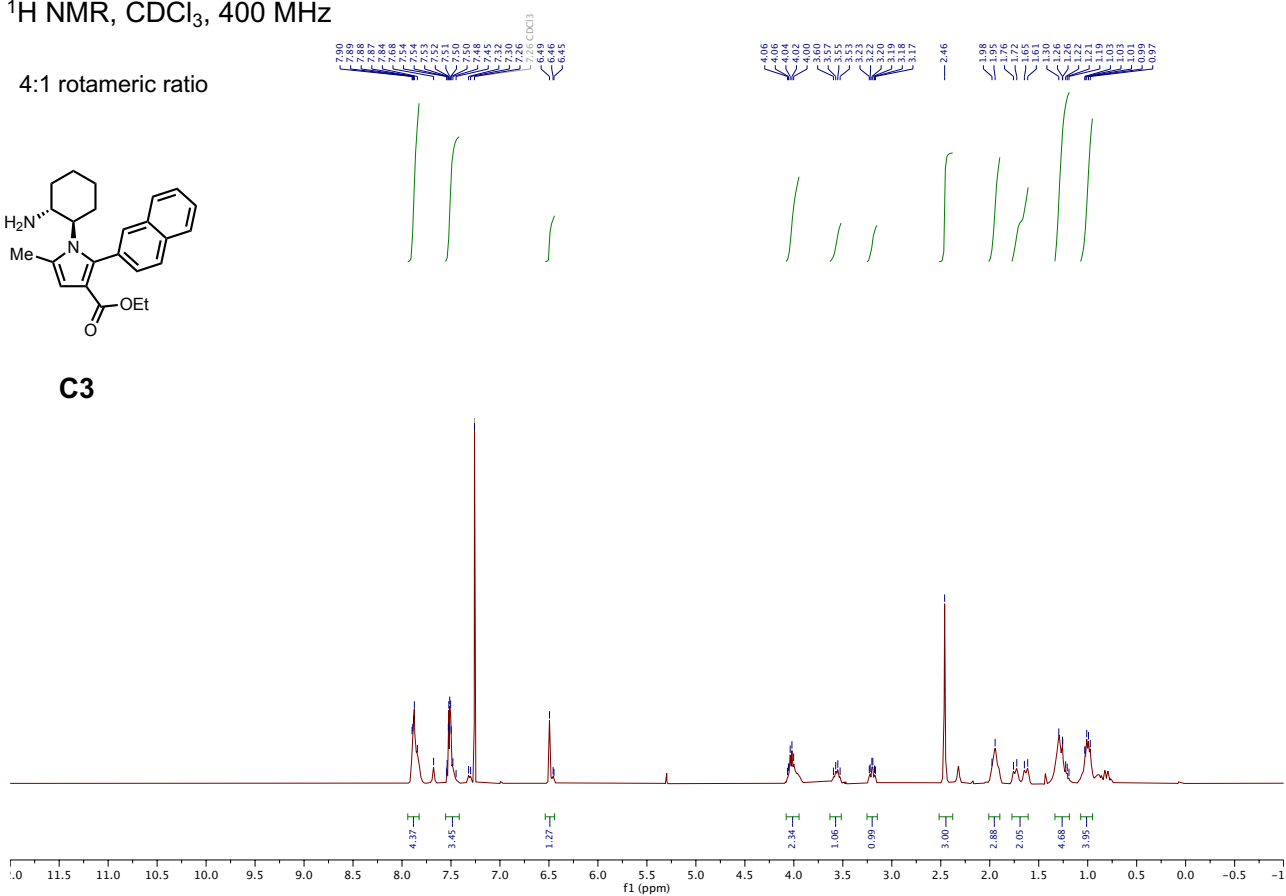

$^{13}\text{C}$  NMR,  $\text{CDCl}_3$ , 101 MHz

4:1 rotameric ratio

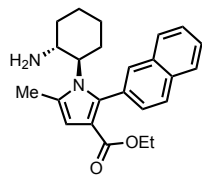

**C3**

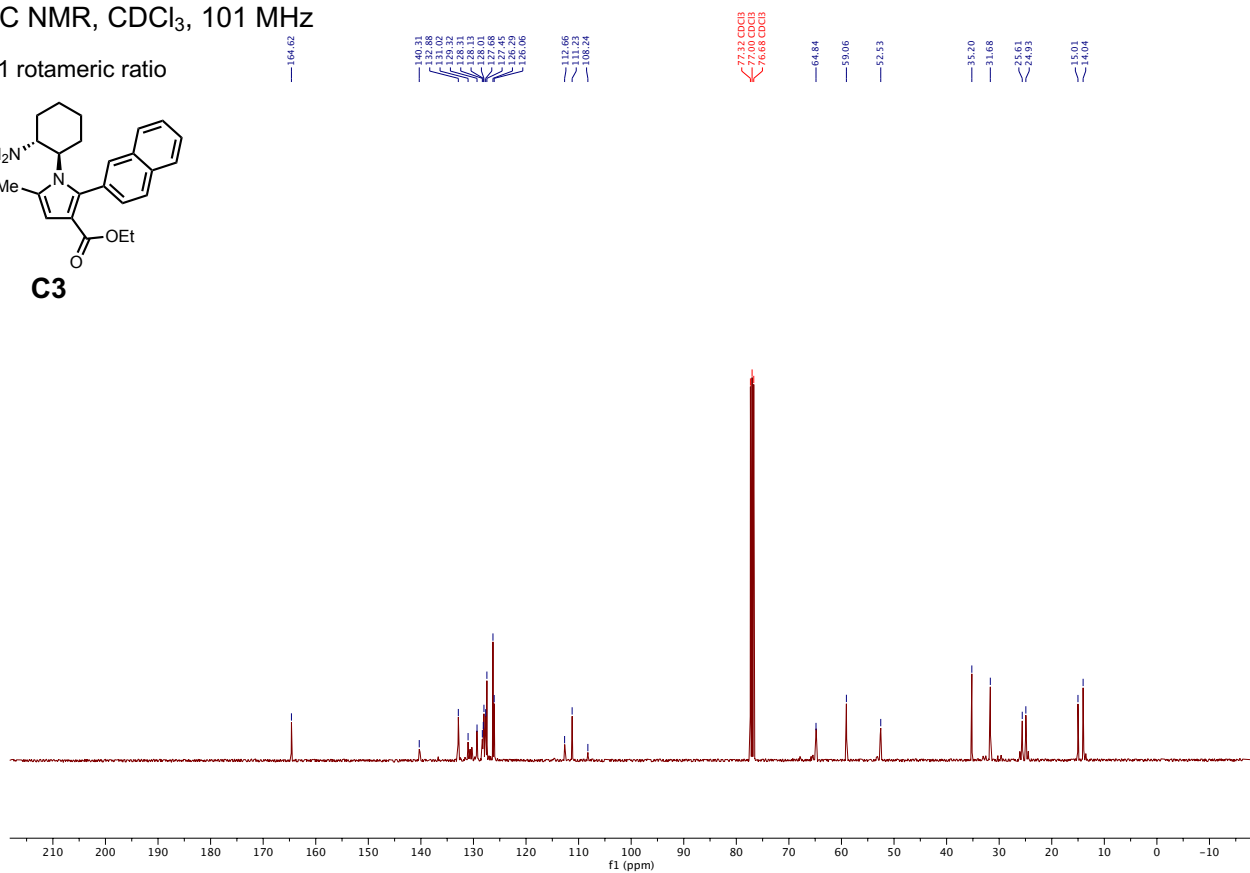



$^1\text{H}$  NMR,  $\text{CDCl}_3$ , 400 MHz

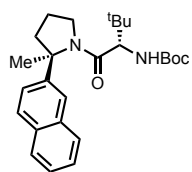

**C4b**

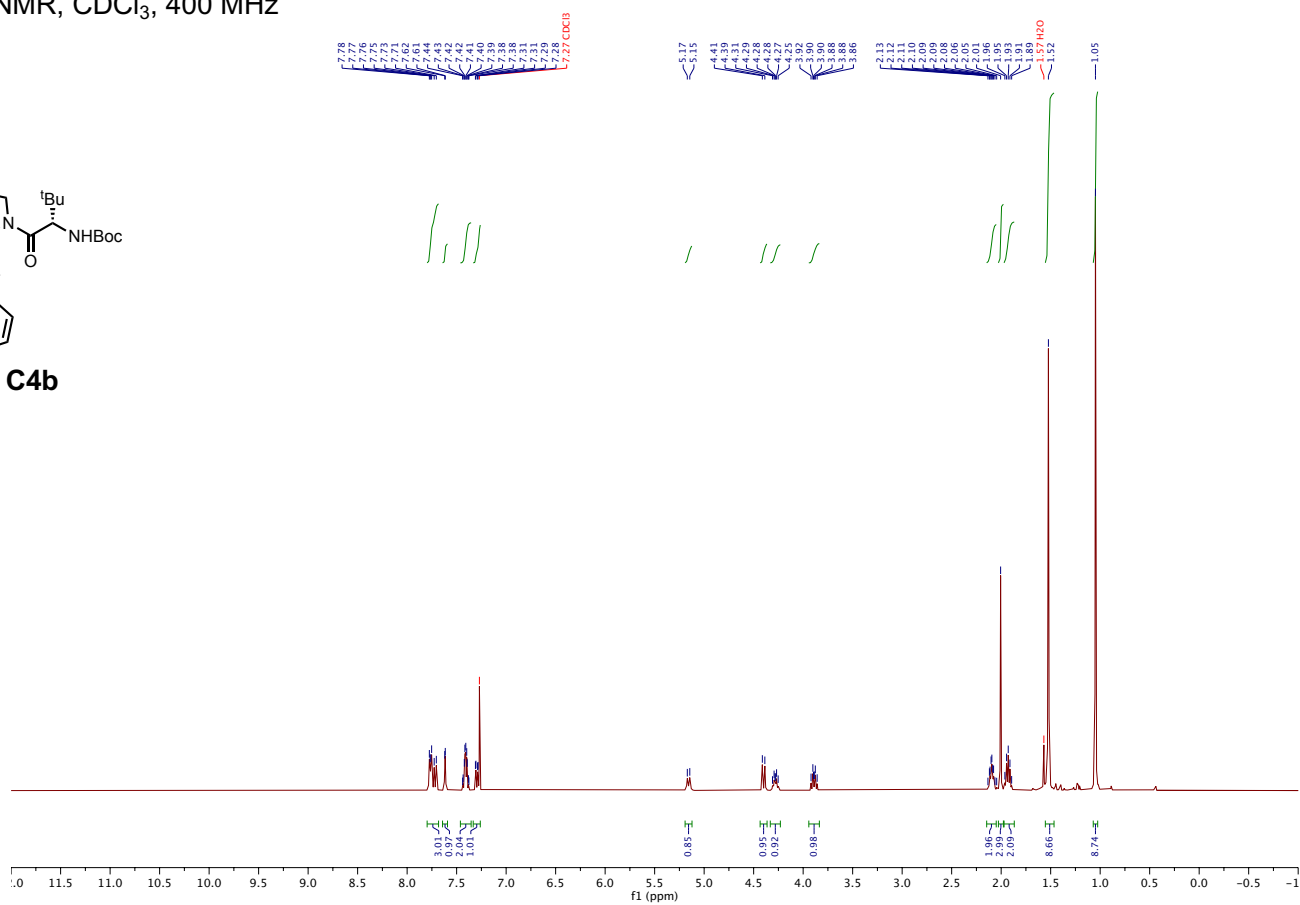

$^{13}\text{C}$  NMR,  $\text{CDCl}_3$ , 101 MHz

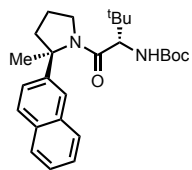

**C4b**

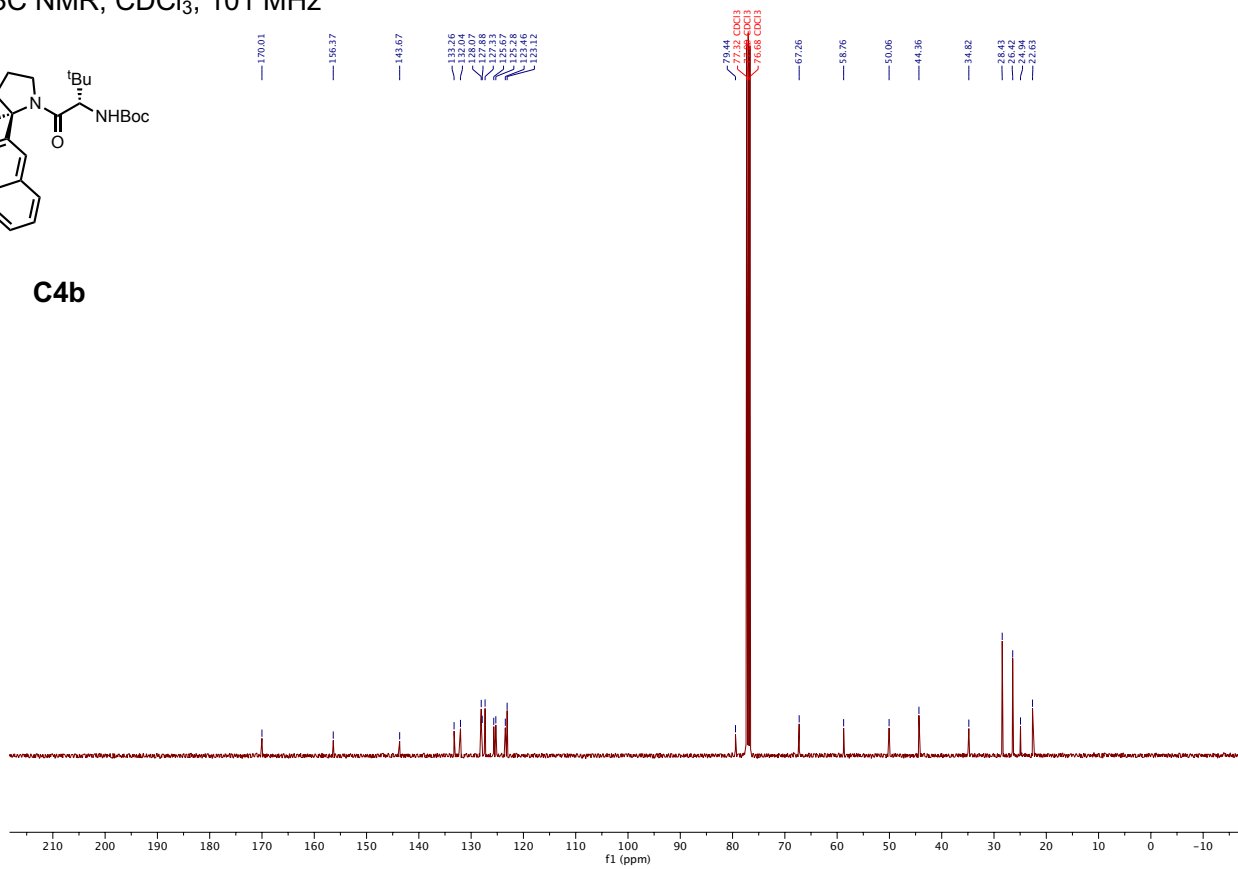

<sup>1</sup>H NMR, CDCl<sub>3</sub>, 400 MHz

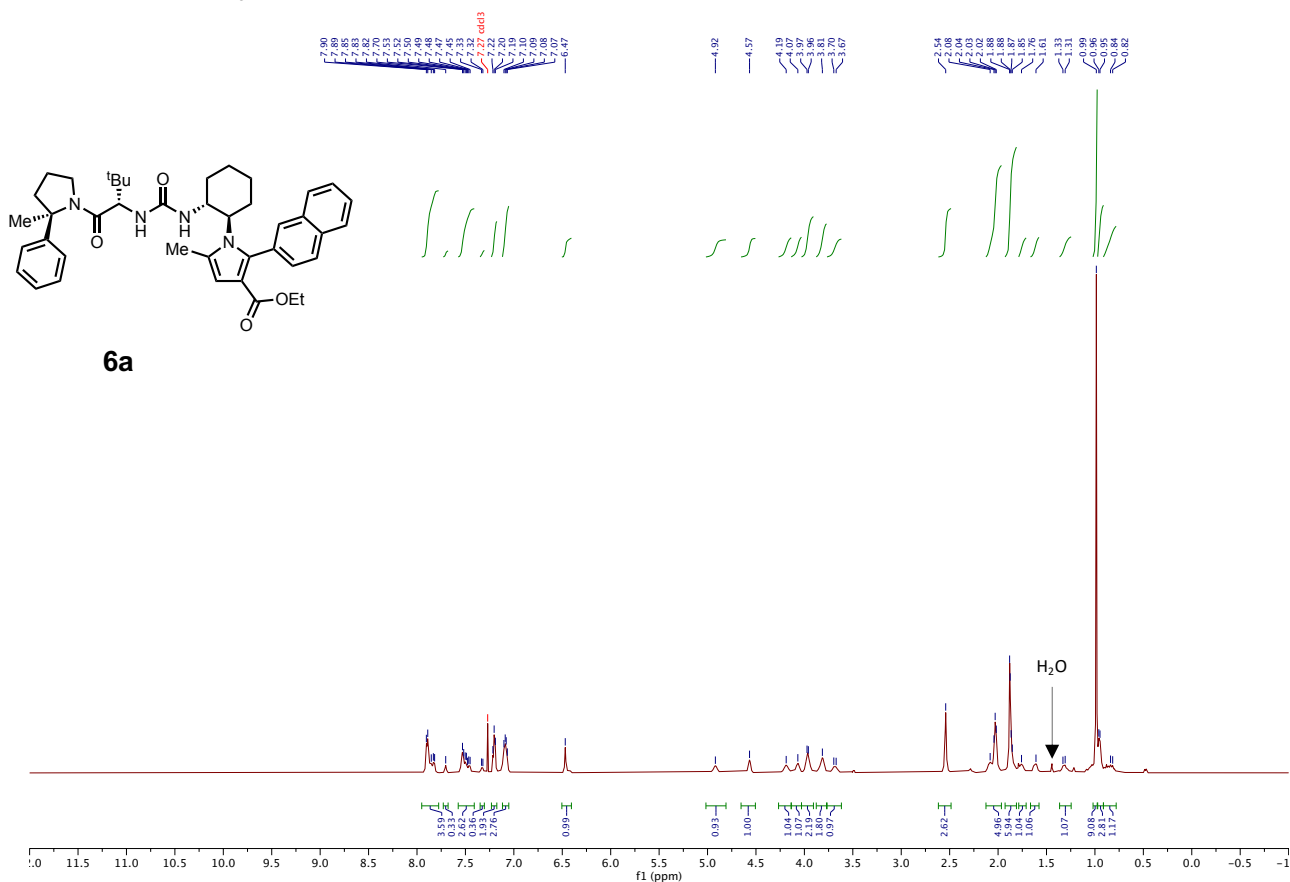

<sup>13</sup>C NMR, CDCl<sub>3</sub>, 101 MHz

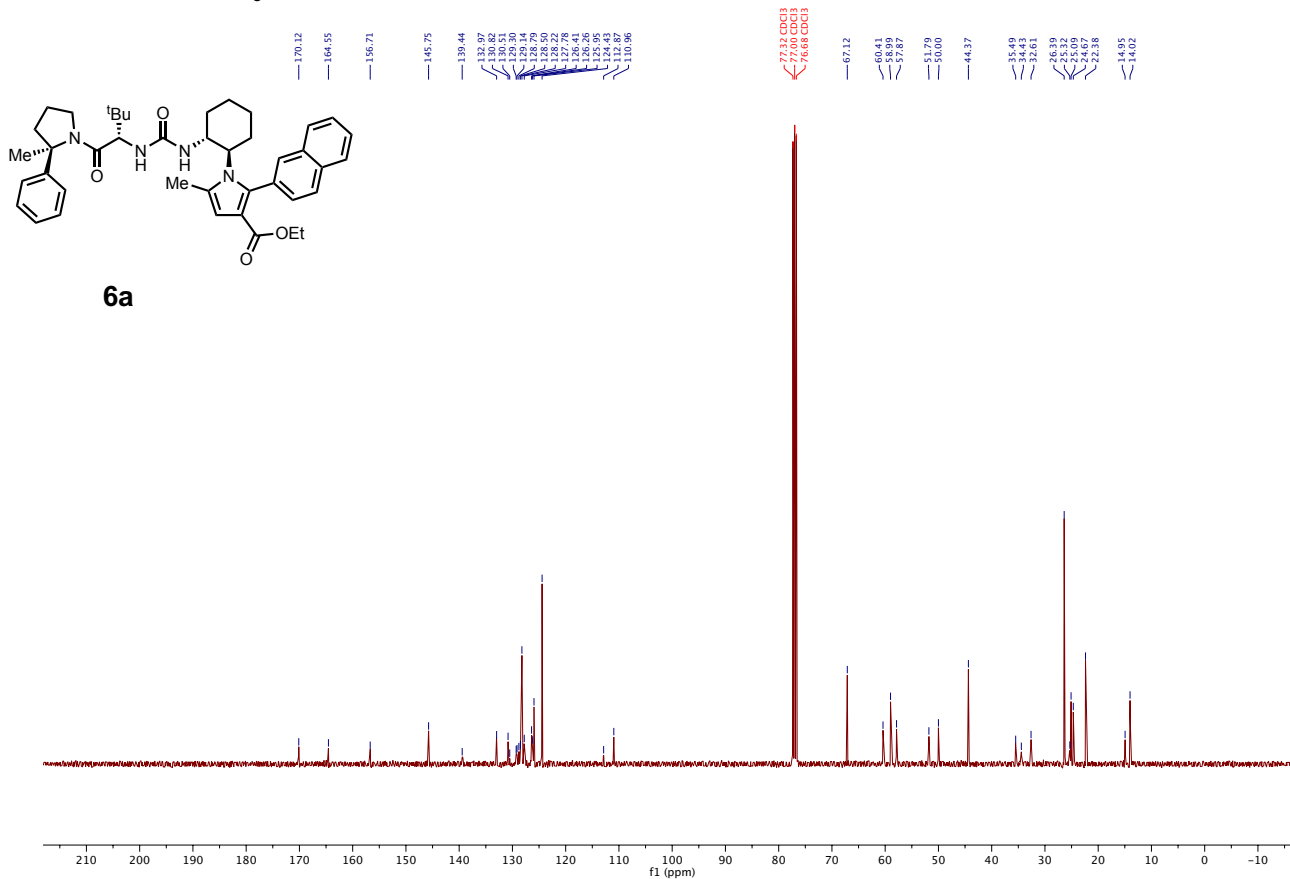

<sup>1</sup>H NMR, CDCl<sub>3</sub>, 400 MHz

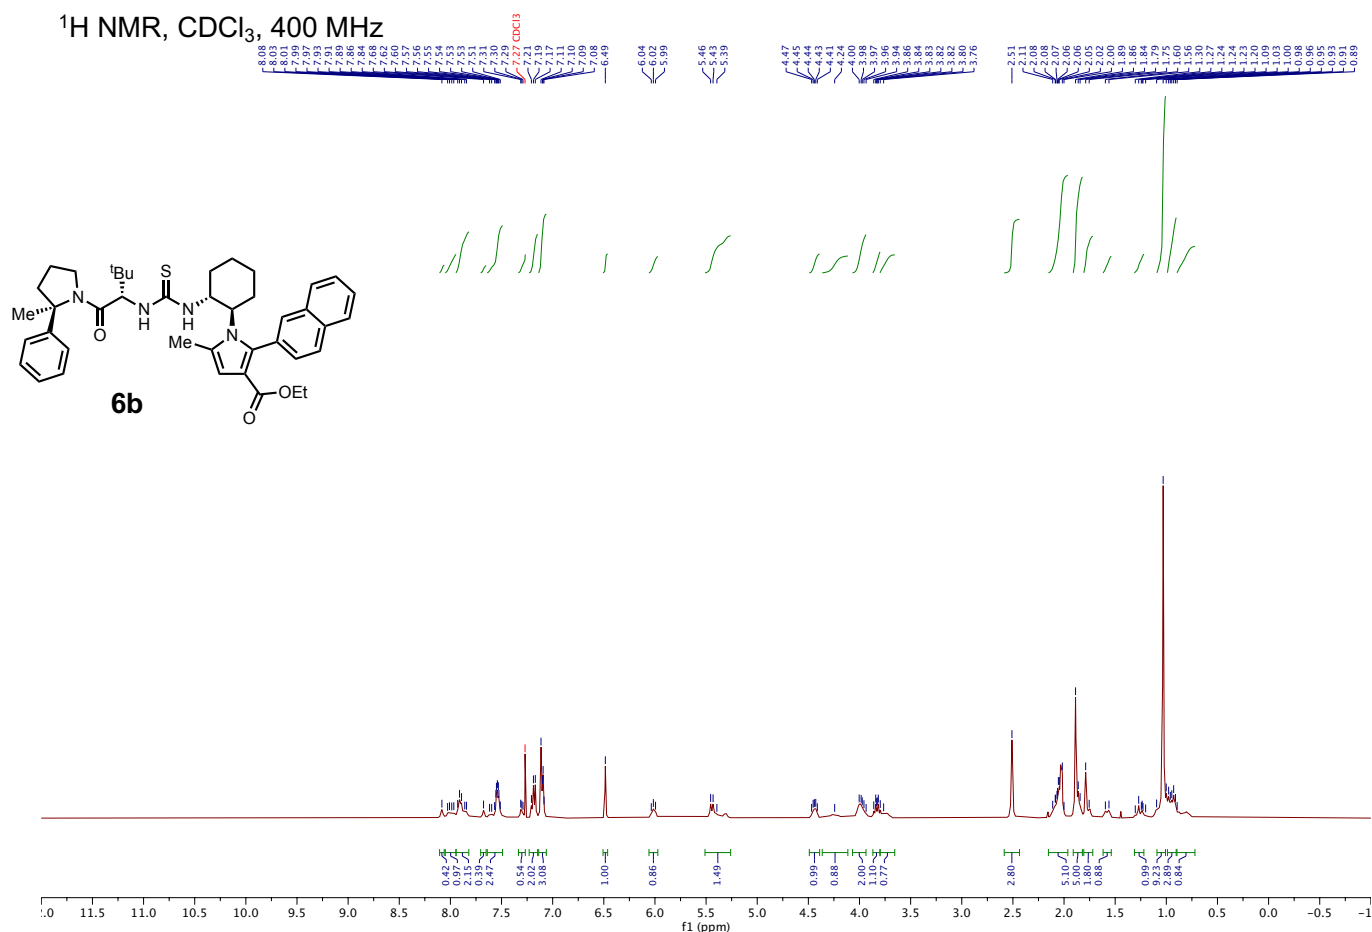

<sup>13</sup>C NMR, CDCl<sub>3</sub>, 101 MHz

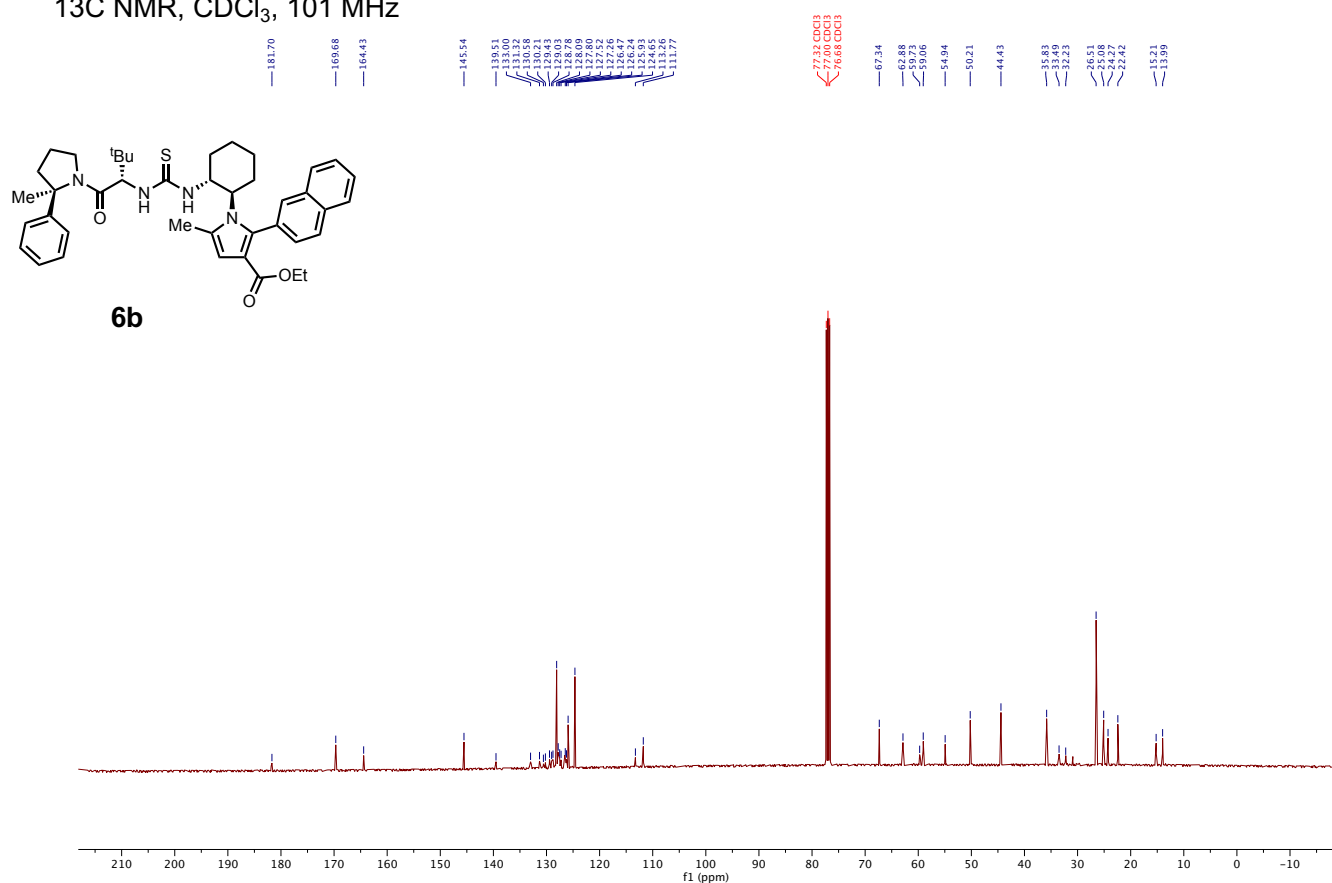

$^1\text{H}$  NMR,  $\text{CDCl}_3$ , 400 MHz

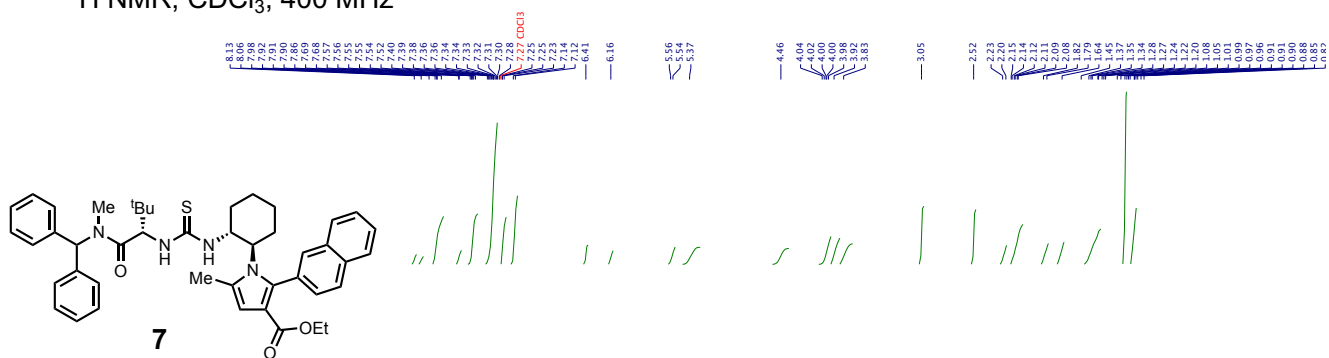

$^{13}\text{C}$  NMR,  $\text{CDCl}_3$ , 101 MHz

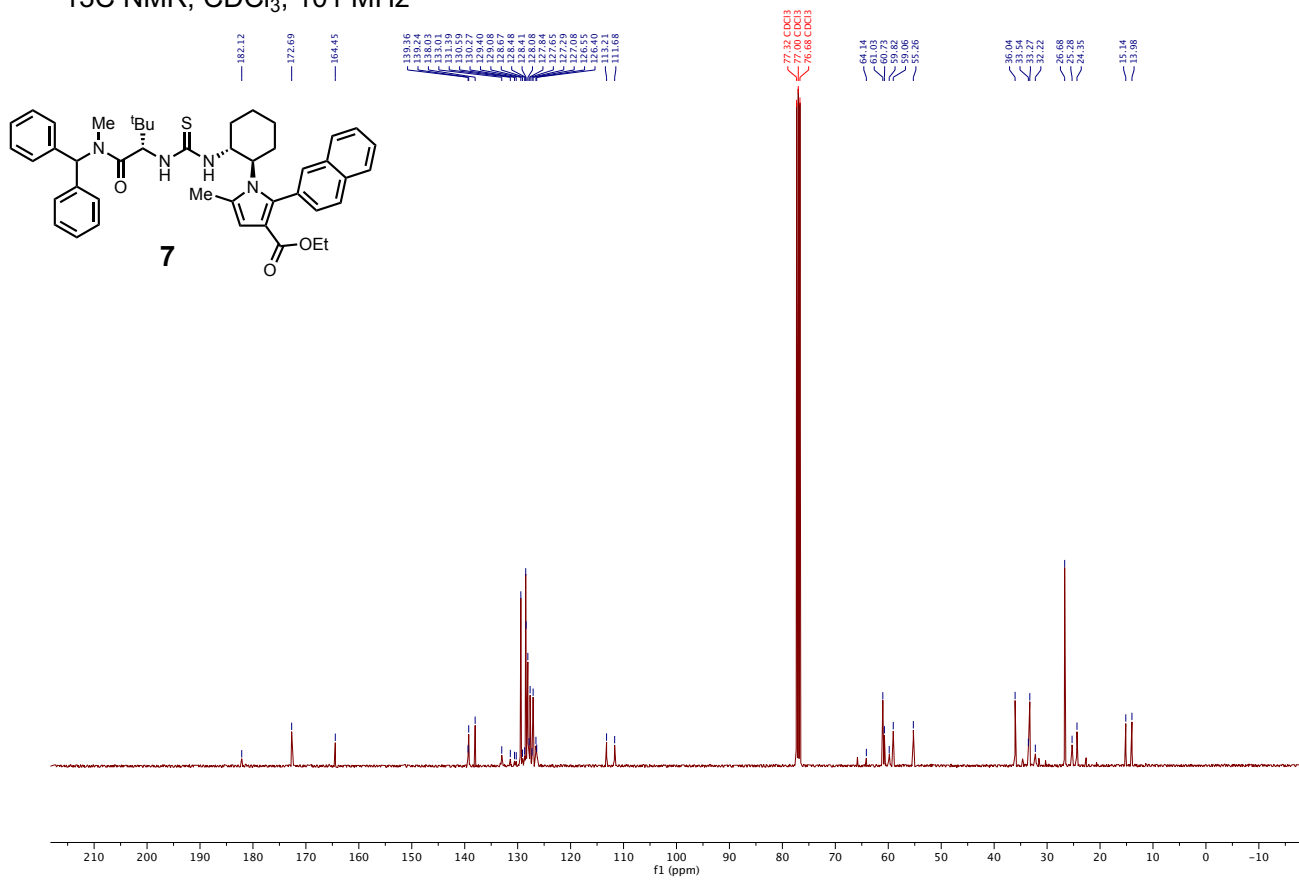

<sup>1</sup>H NMR, CDCl<sub>3</sub>, 400 MHz

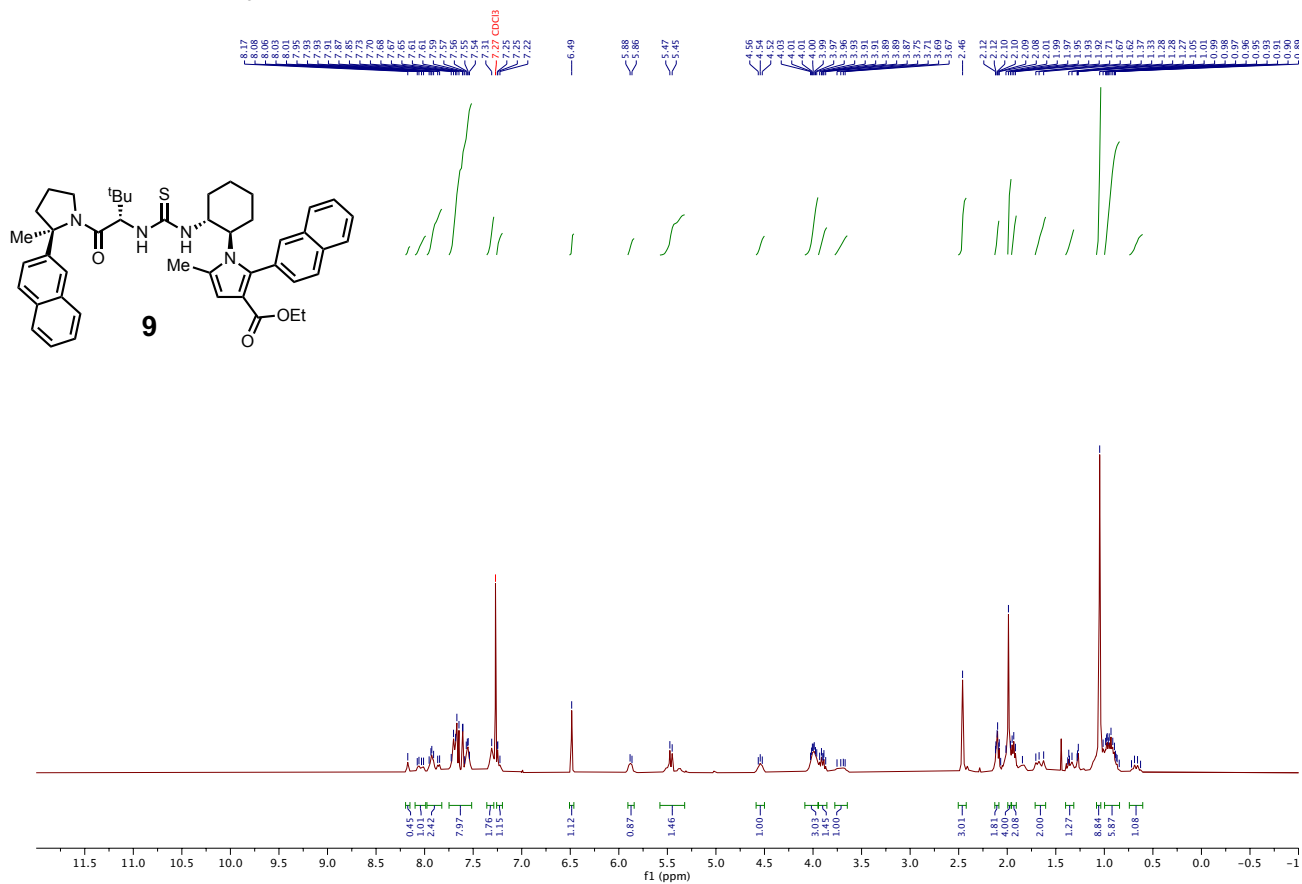

<sup>13</sup>C NMR, CDCl<sub>3</sub>, 101 MHz

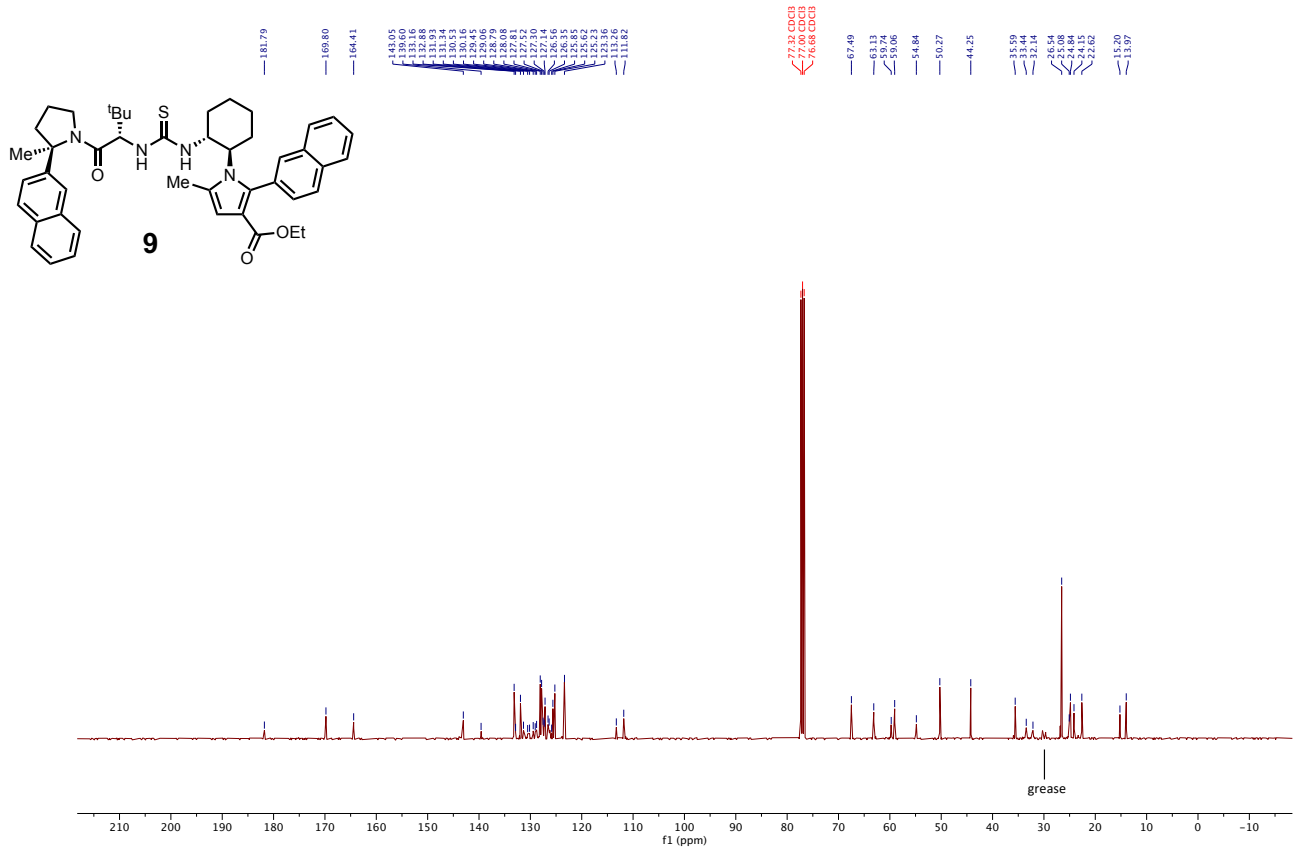

<sup>1</sup>H NMR, CDCl<sub>3</sub>, 400 MHz

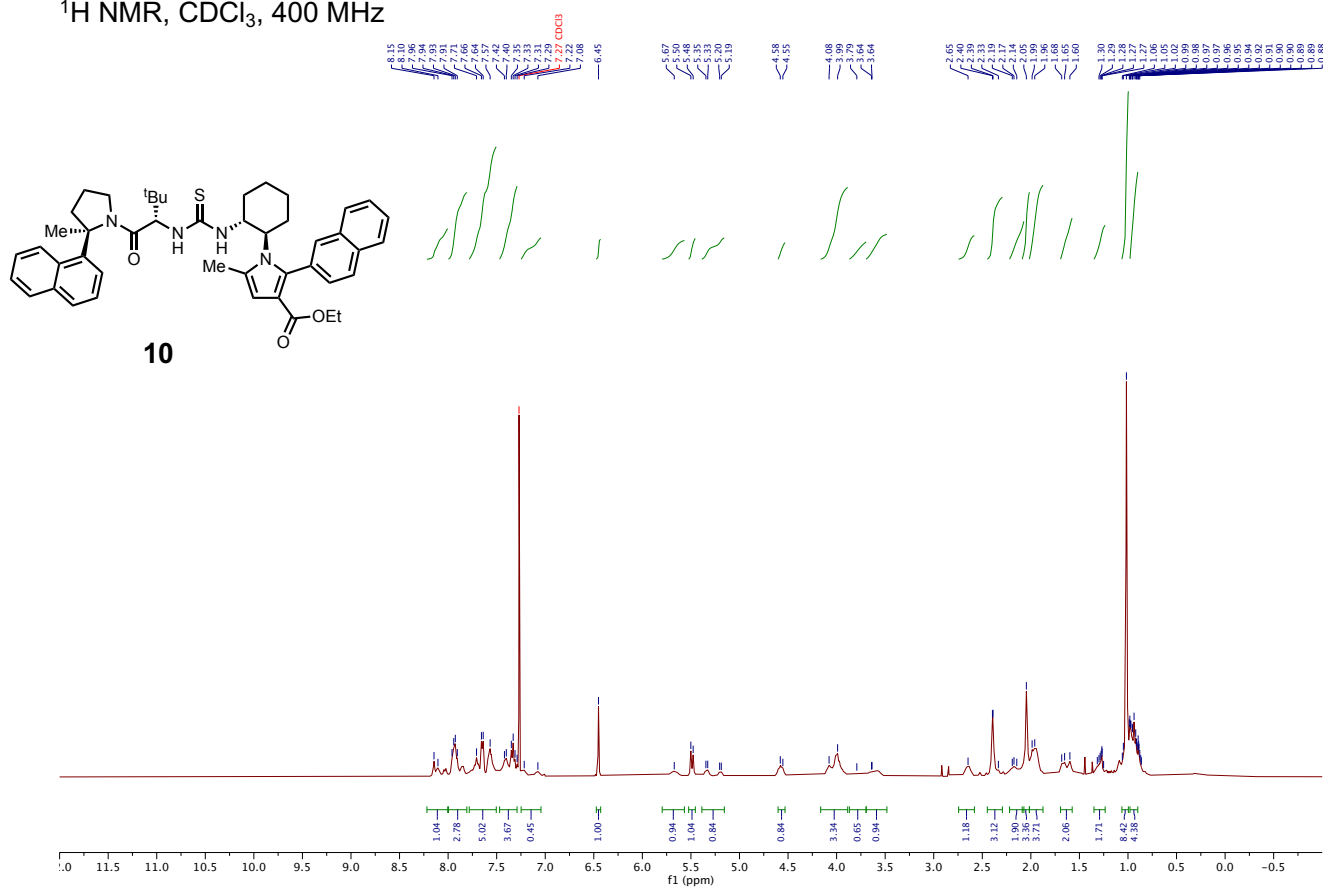

<sup>13</sup>C NMR, CDCl<sub>3</sub>, 101 MHz

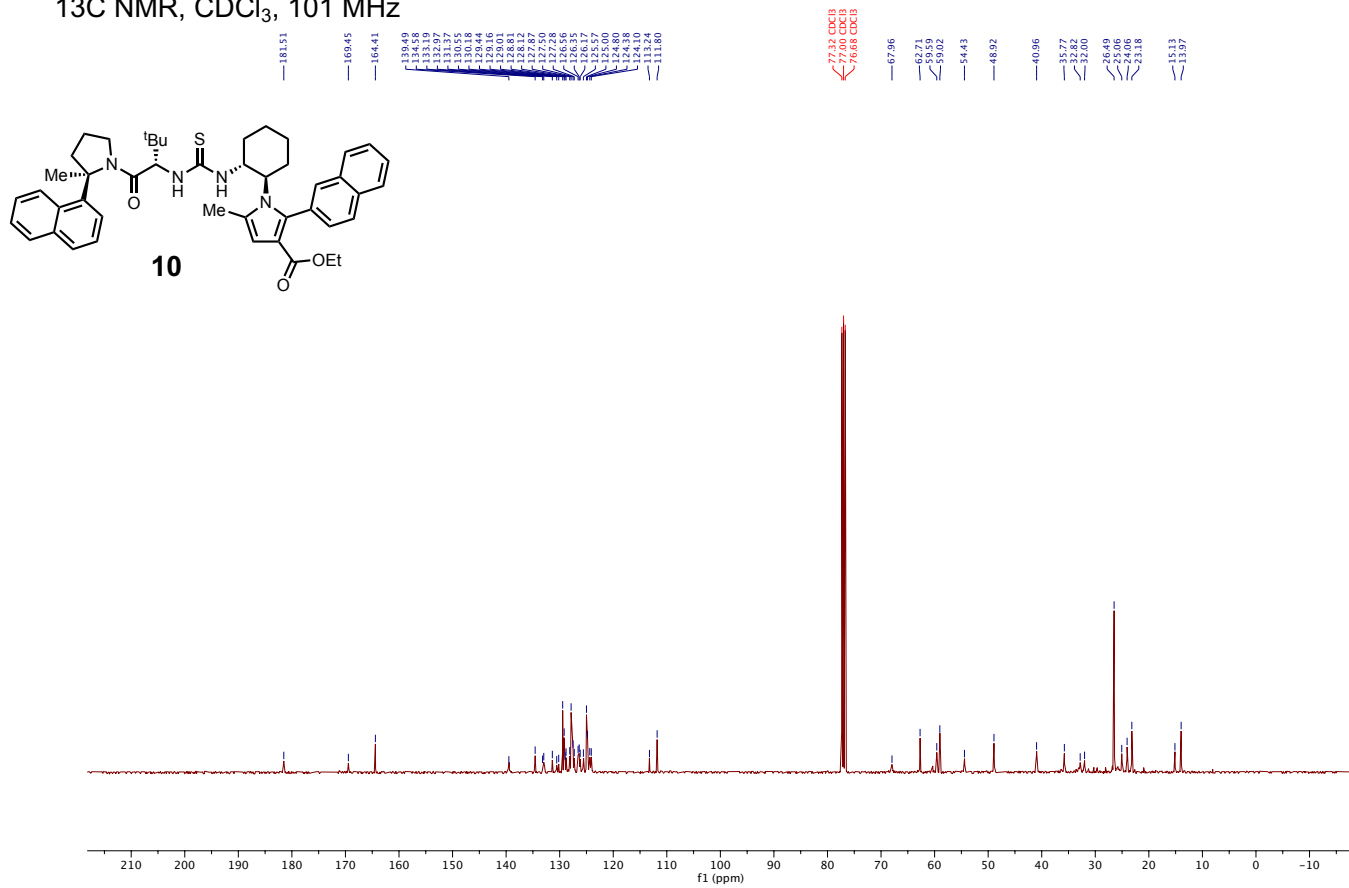

<sup>1</sup>H NMR, CDCl<sub>3</sub>, 400 MHz

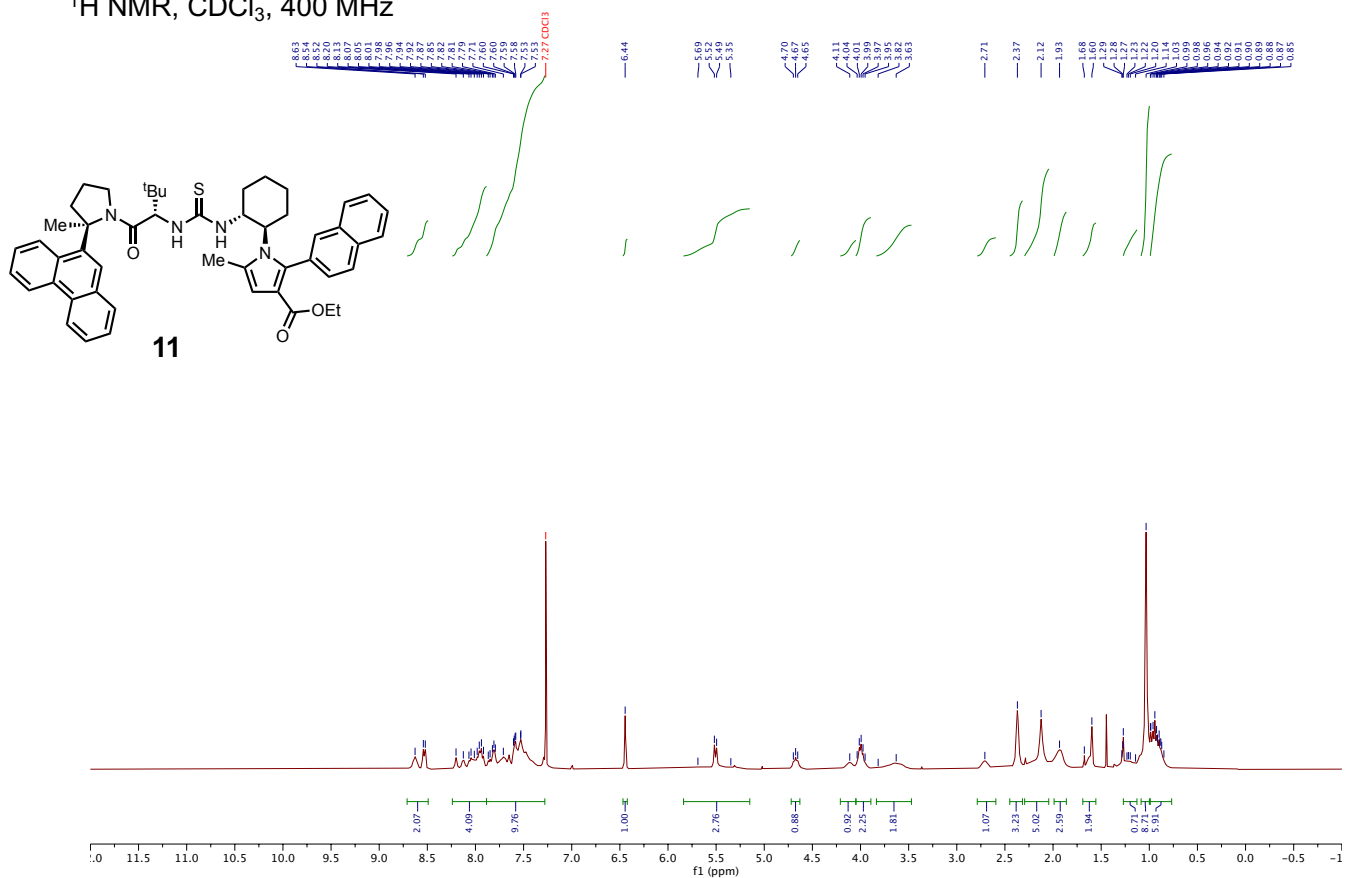

<sup>13</sup>C NMR, CDCl<sub>3</sub>, 101 MHz

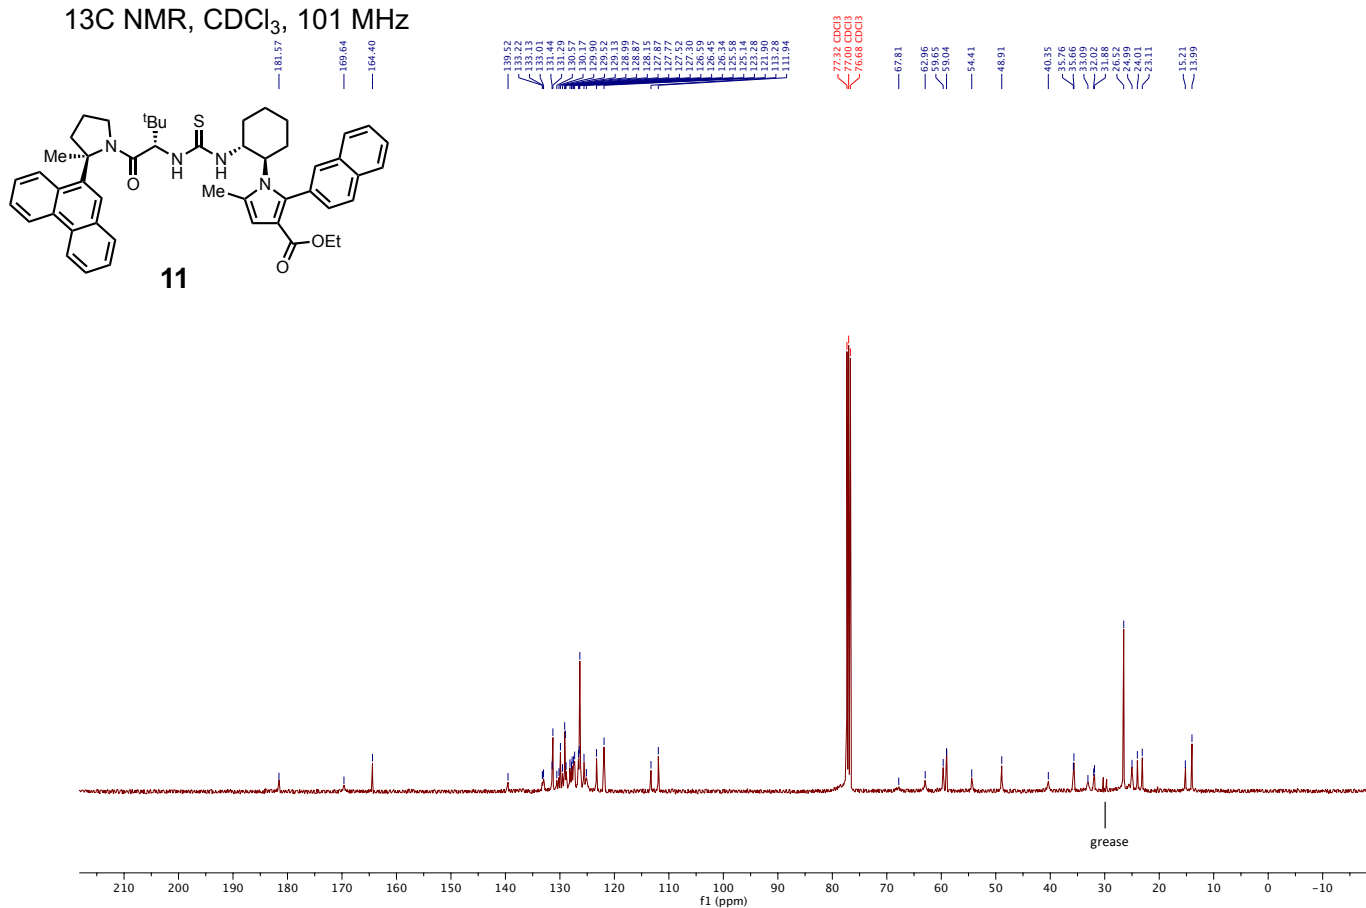

<sup>1</sup>H NMR, CDCl<sub>3</sub>, 400 MHz

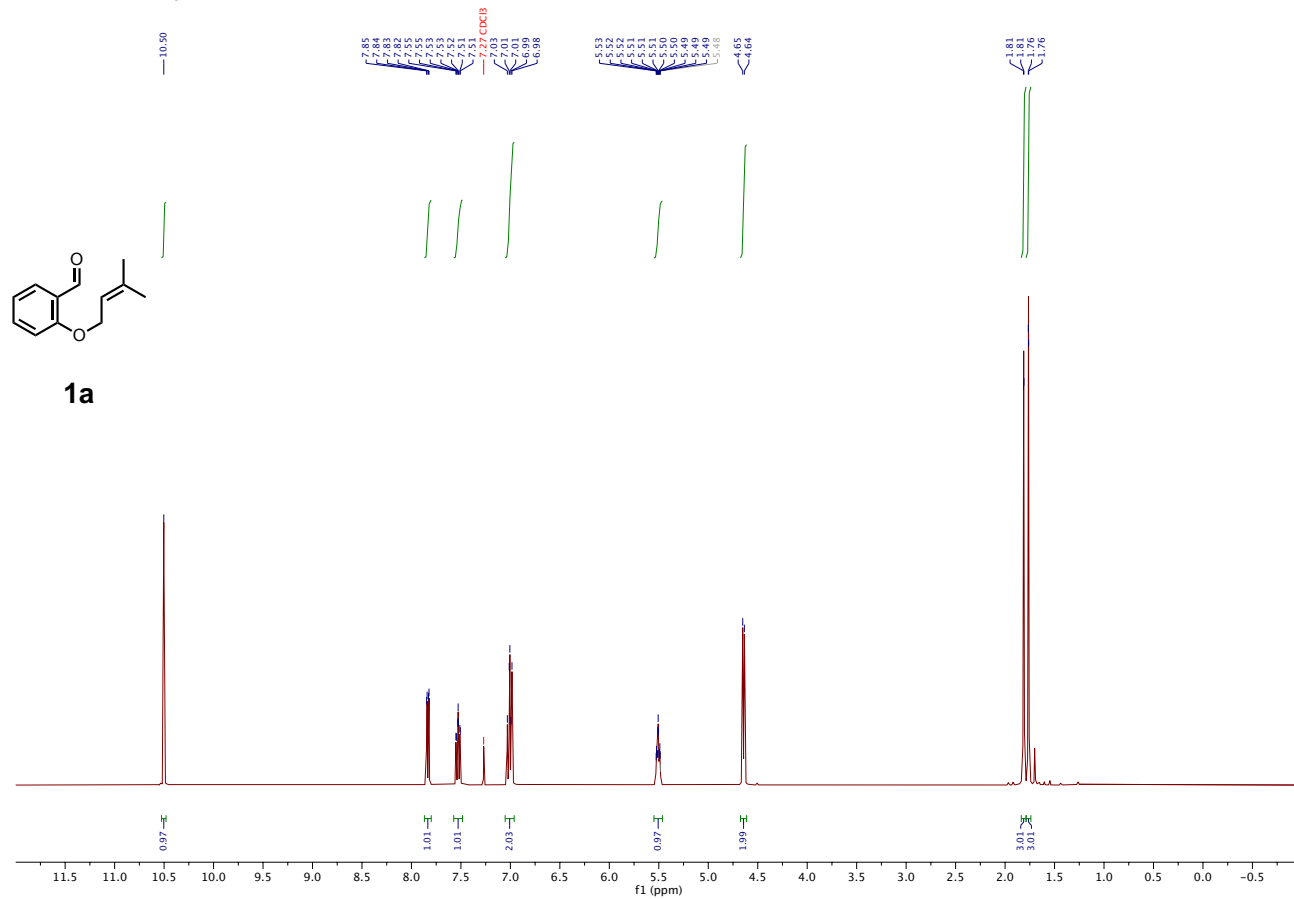

<sup>13</sup>C NMR, CDCl<sub>3</sub>, 101 MHz

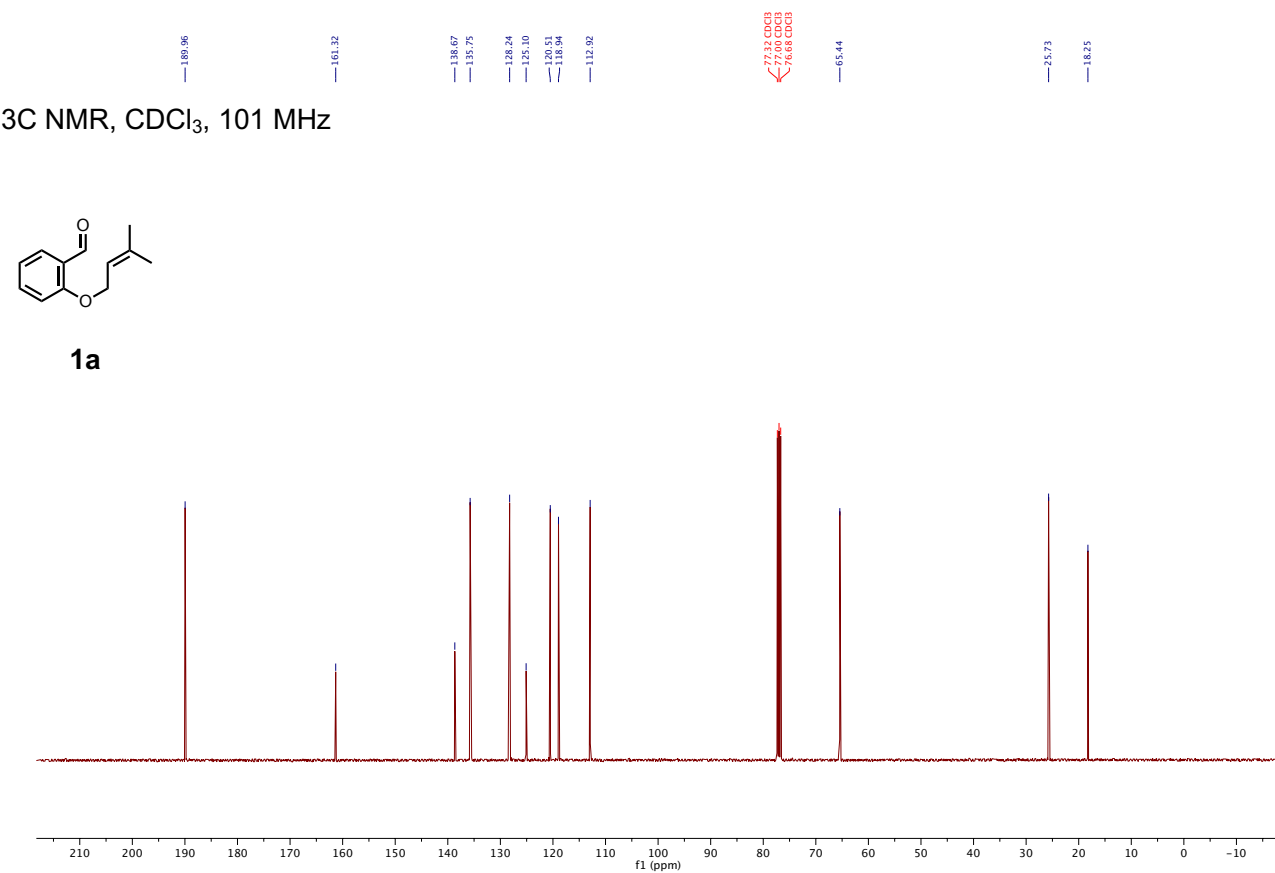



<sup>1</sup>H NMR, CDCl<sub>3</sub>, 400 MHz

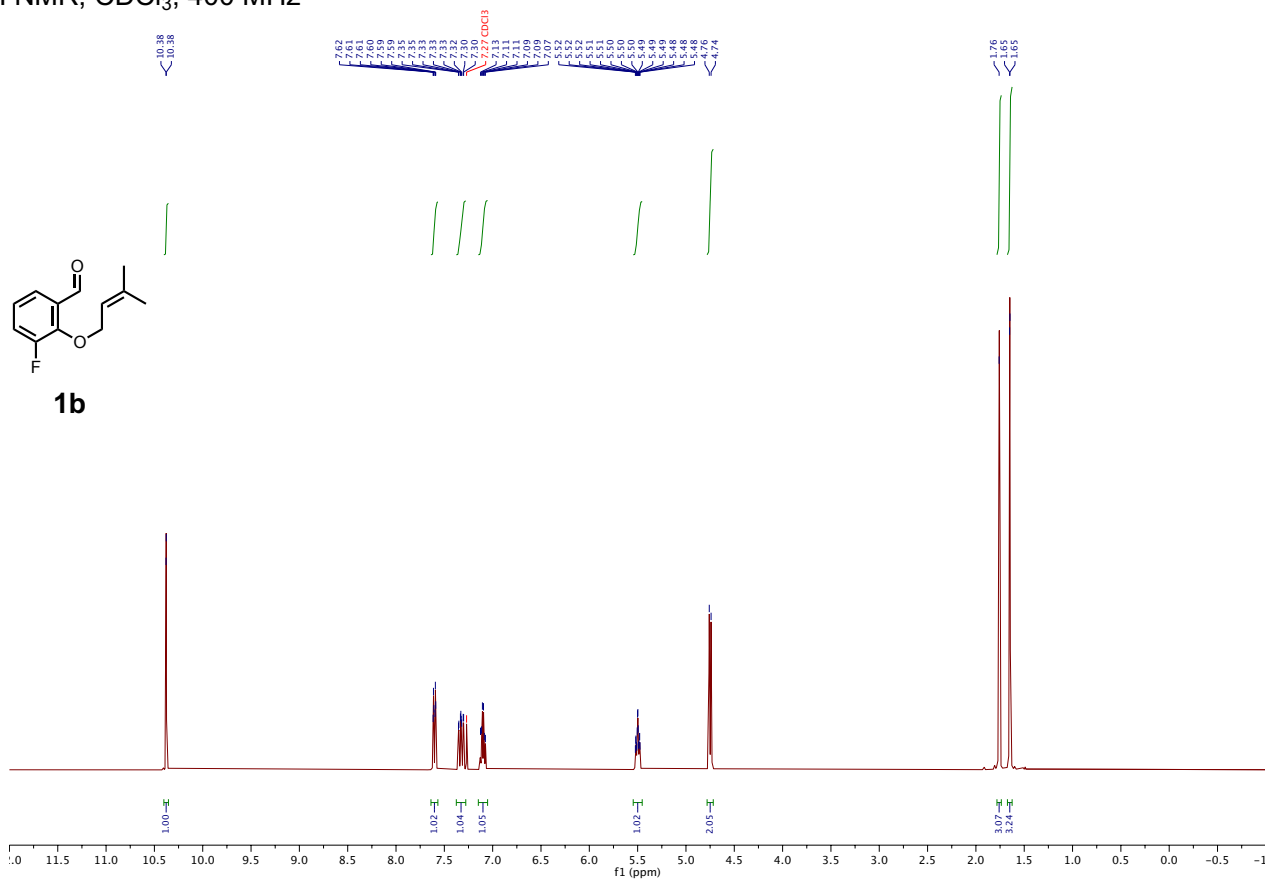

<sup>13</sup>C NMR, CDCl<sub>3</sub>, 101 MHz

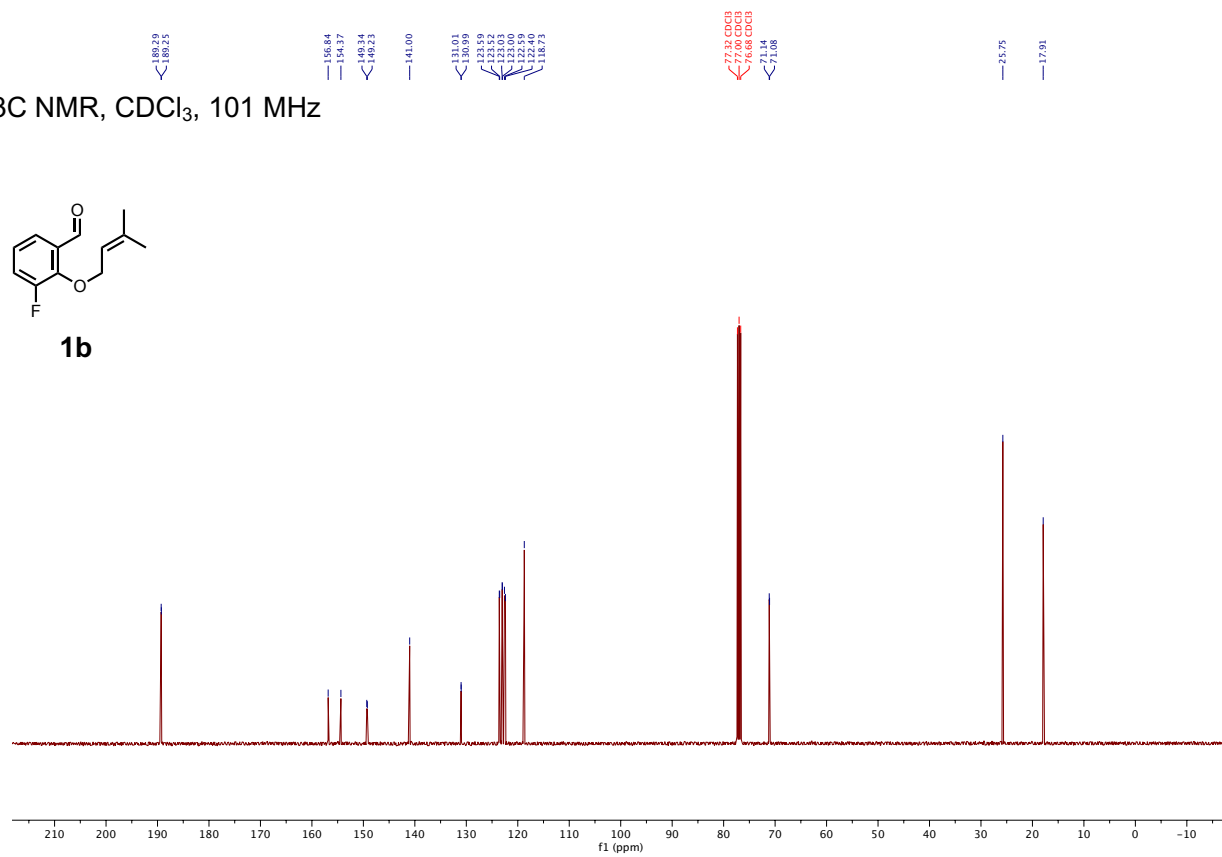

$^{19}\text{F}$  NMR,  $\text{CDCl}_3$ , 376 MHz

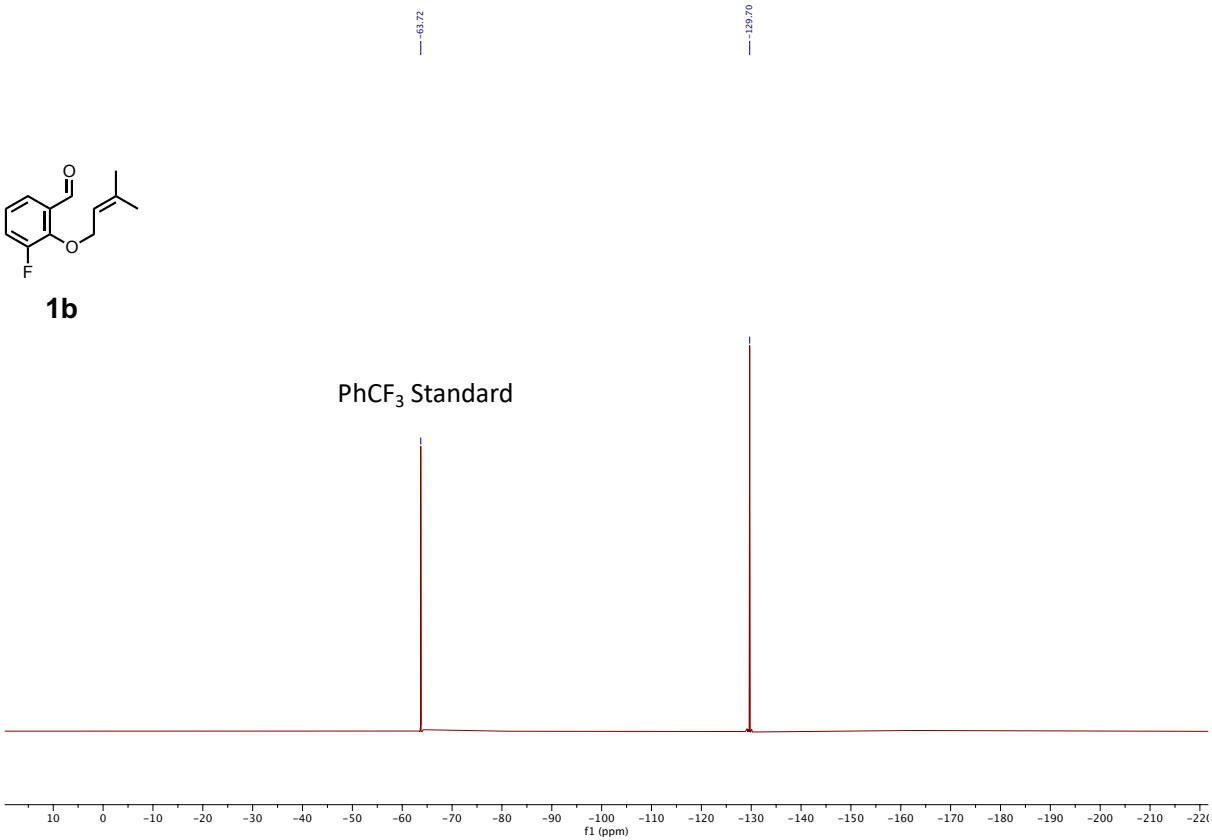

$^1\text{H}$  NMR,  $\text{CDCl}_3$ , 400 MHz

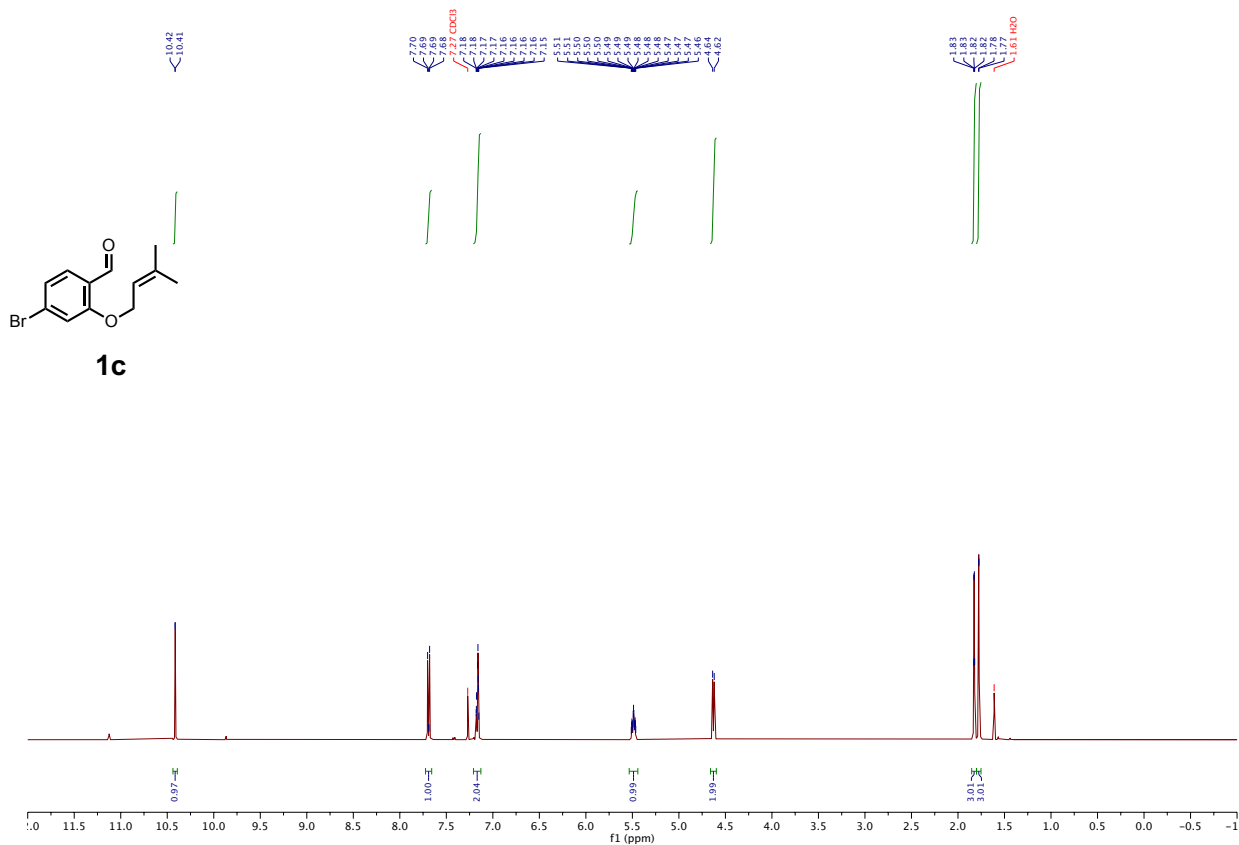

$^{13}\text{C}$  NMR,  $\text{CDCl}_3$ , 101 MHz

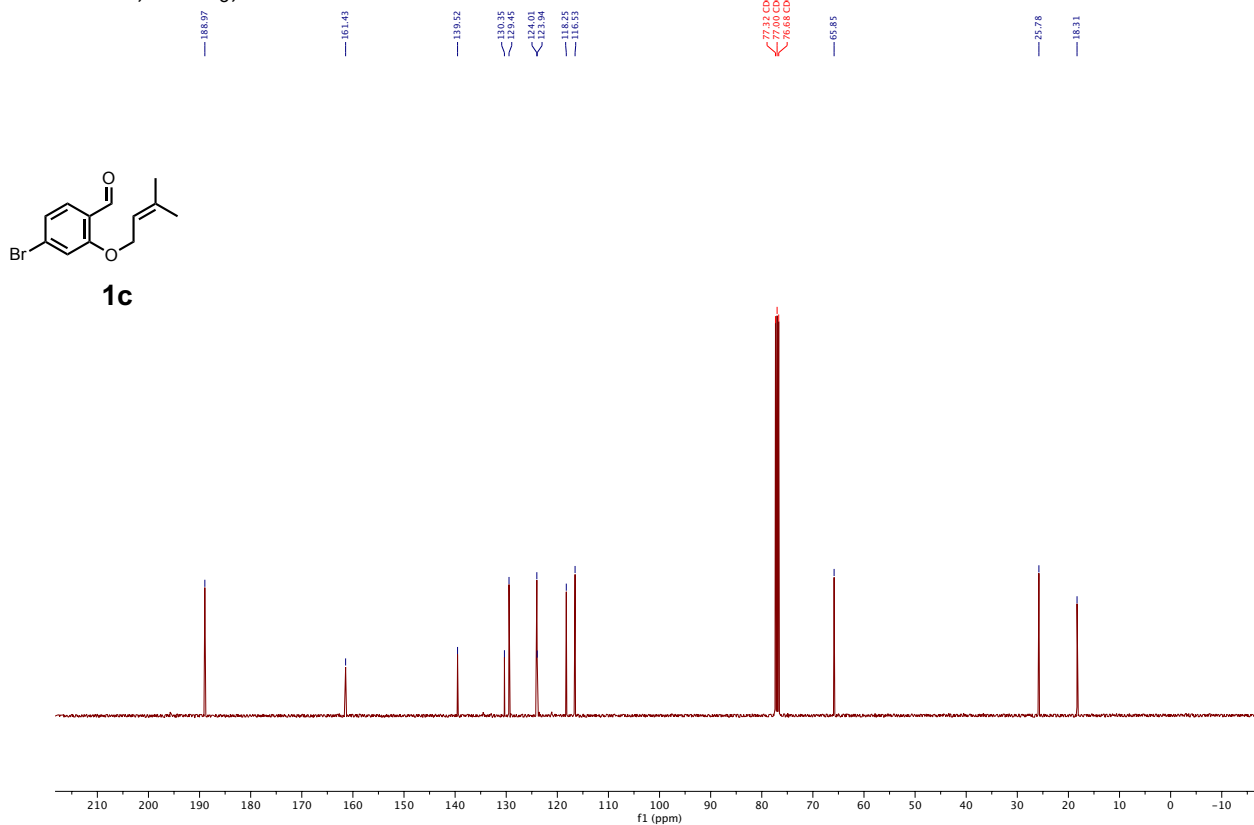

$^1\text{H}$  NMR,  $\text{CDCl}_3$ , 400 MHz

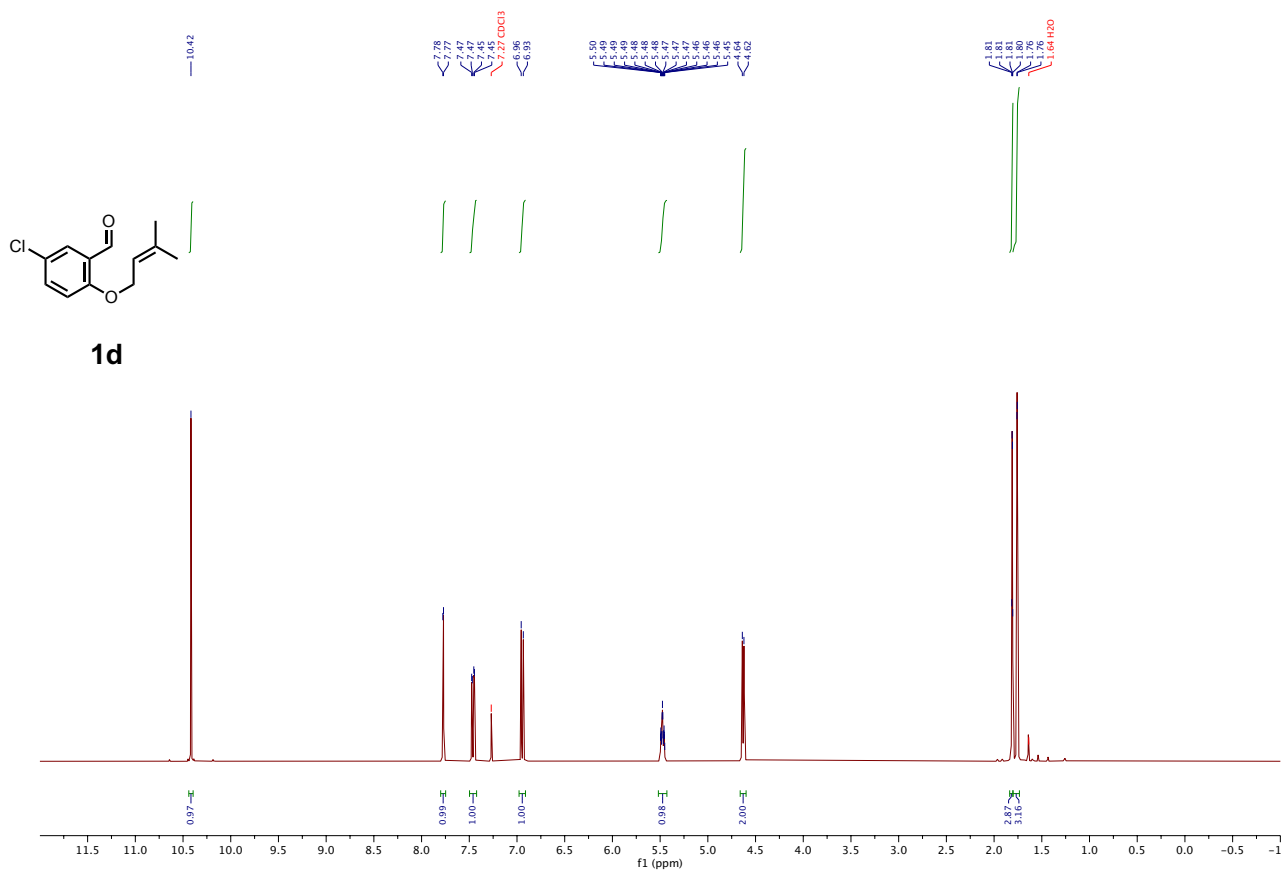

$^{13}\text{C}$  NMR,  $\text{CDCl}_3$ , 101 MHz

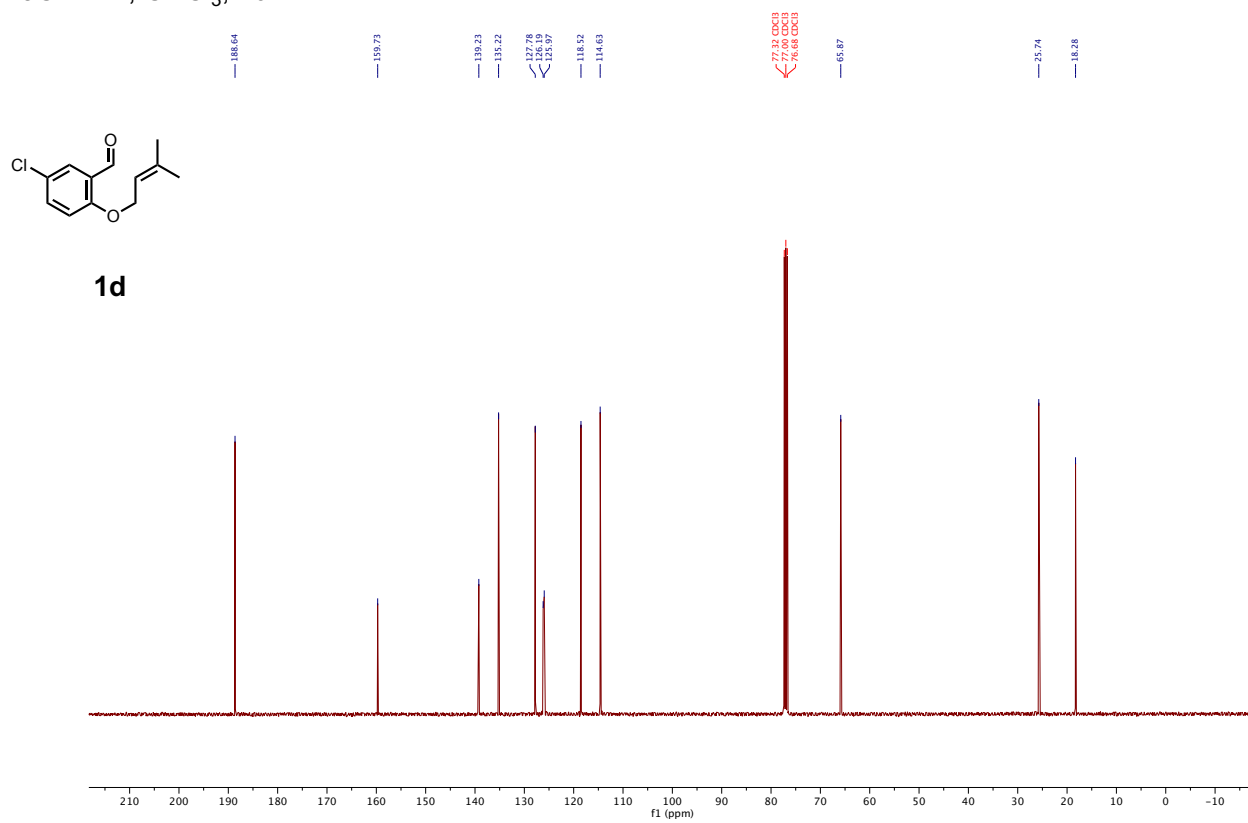

$^1\text{H}$  NMR,  $\text{CDCl}_3$ , 400 MHz

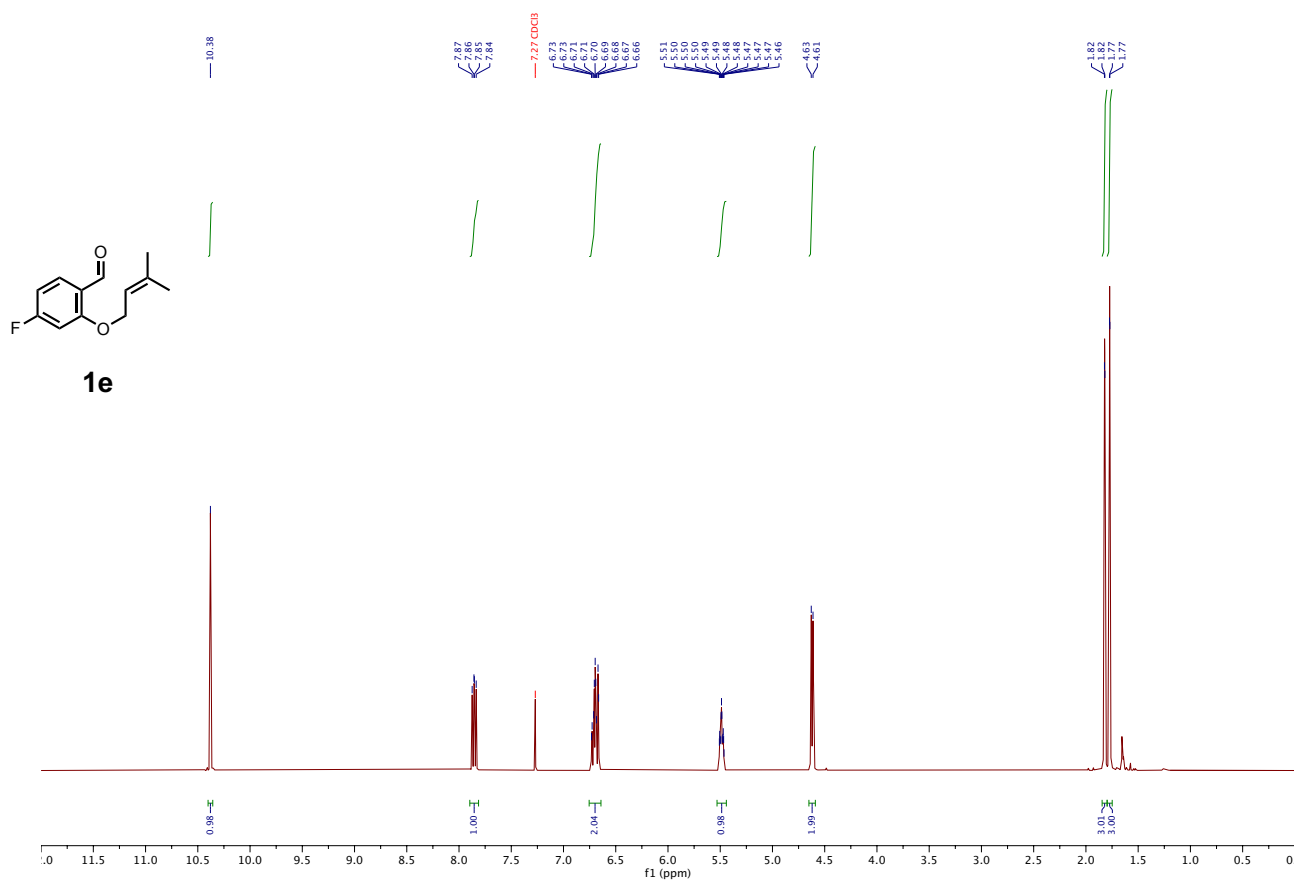

$^{13}\text{C}$  NMR,  $\text{CDCl}_3$ , 101 MHz

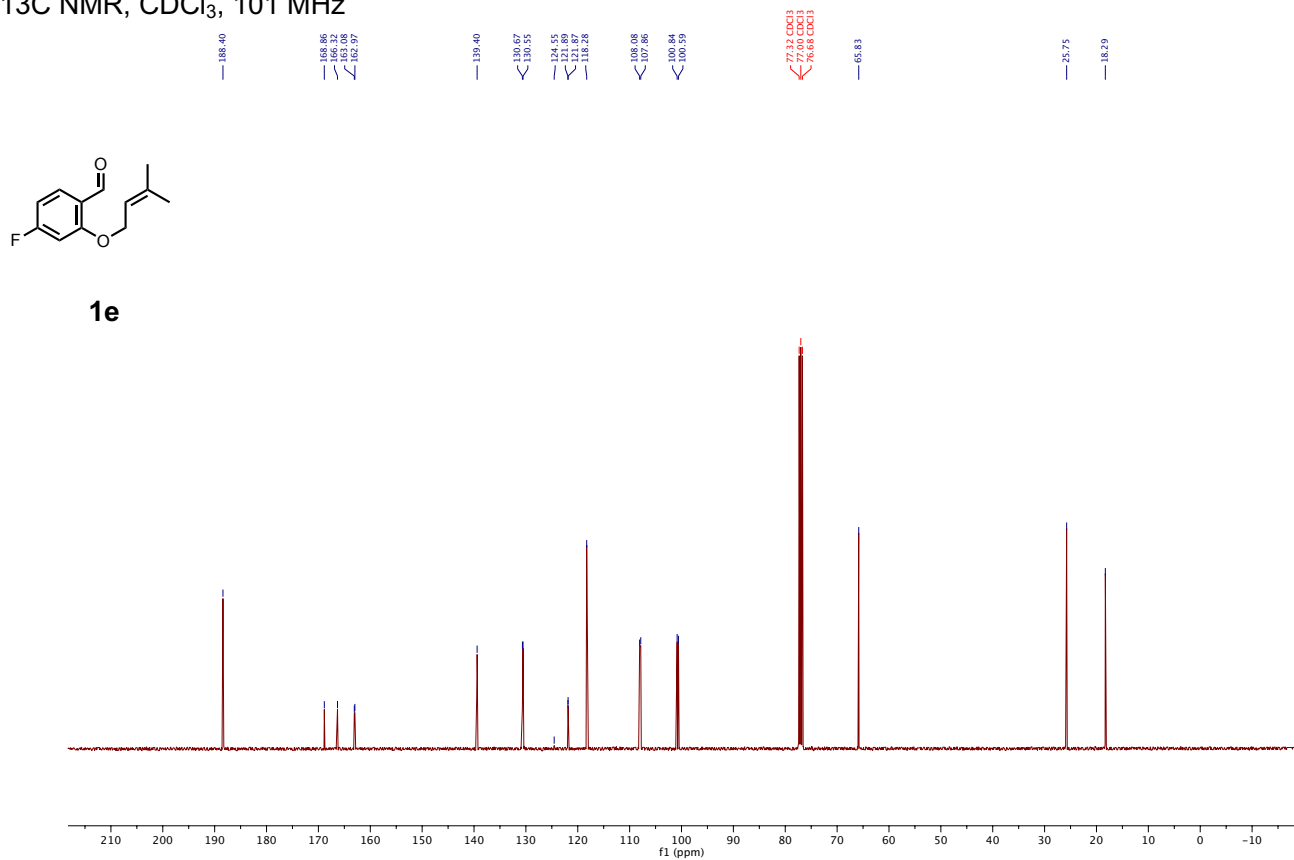

$^{19}\text{F}$  NMR,  $\text{CDCl}_3$ , 376 MHz

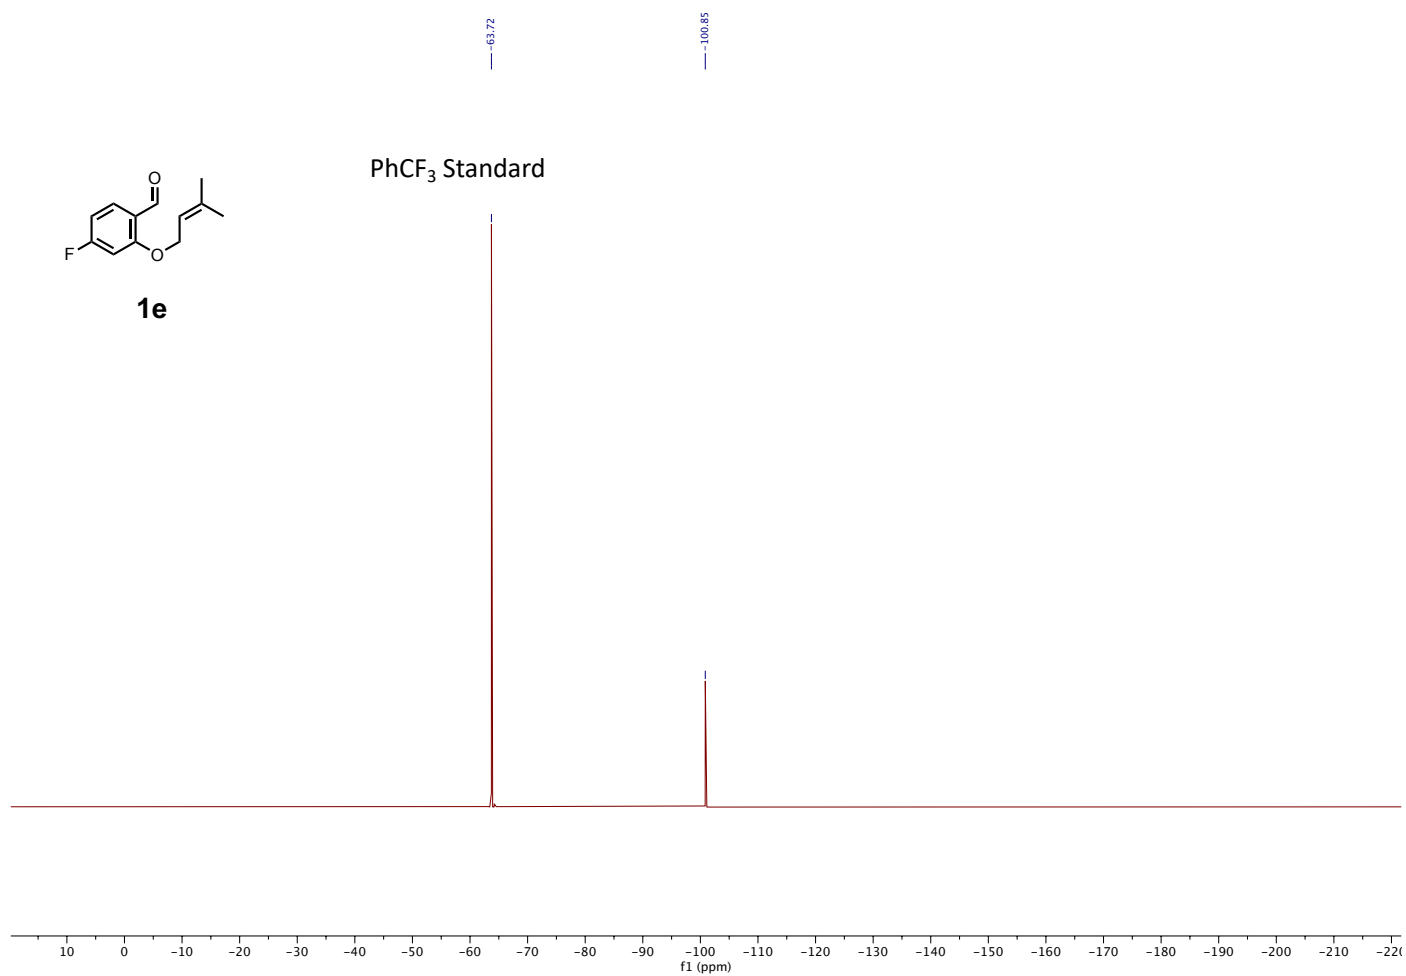

<sup>1</sup>H NMR, CDCl<sub>3</sub>, 400 MHz

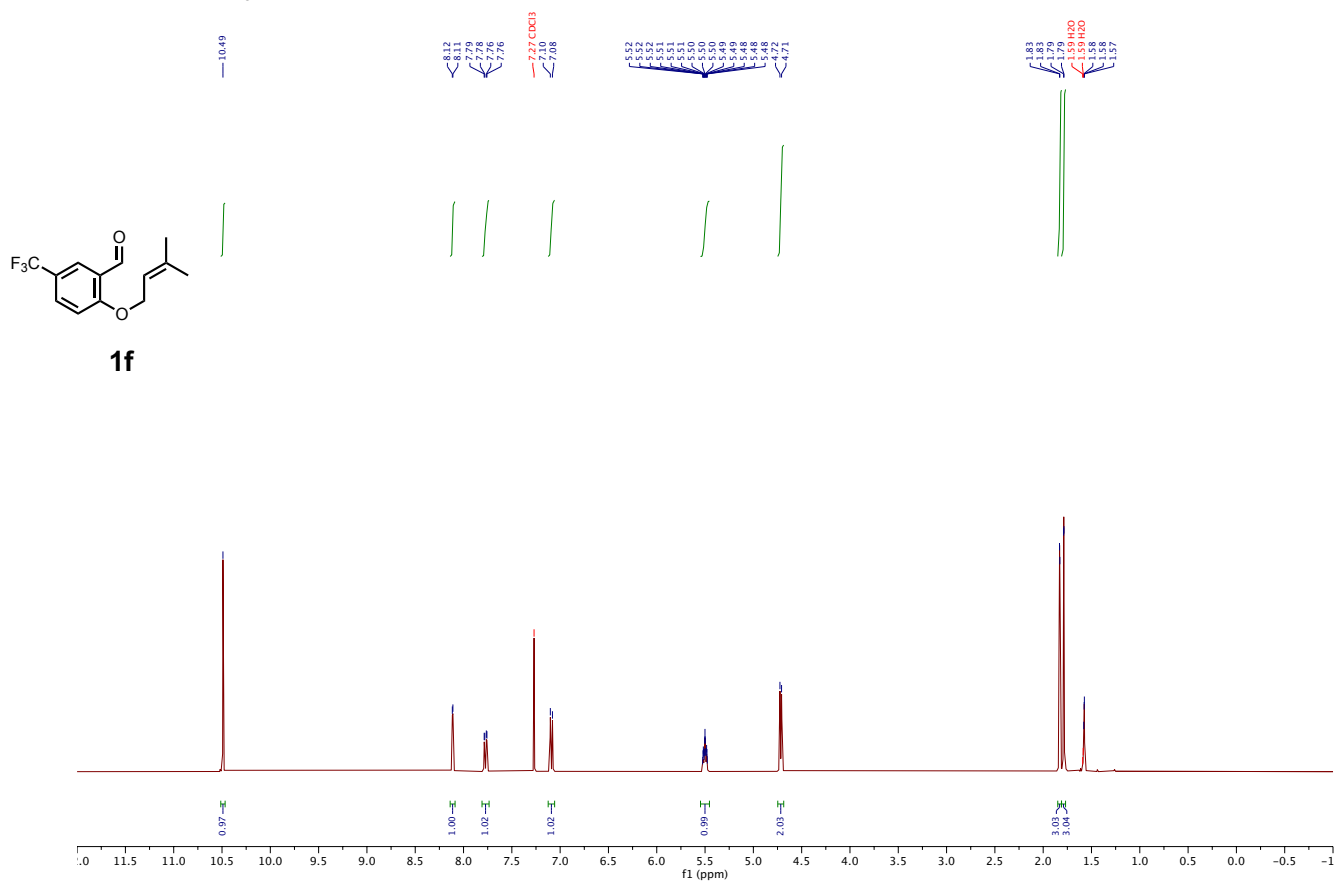

<sup>13</sup>C NMR, CDCl<sub>3</sub>, 101 MHz

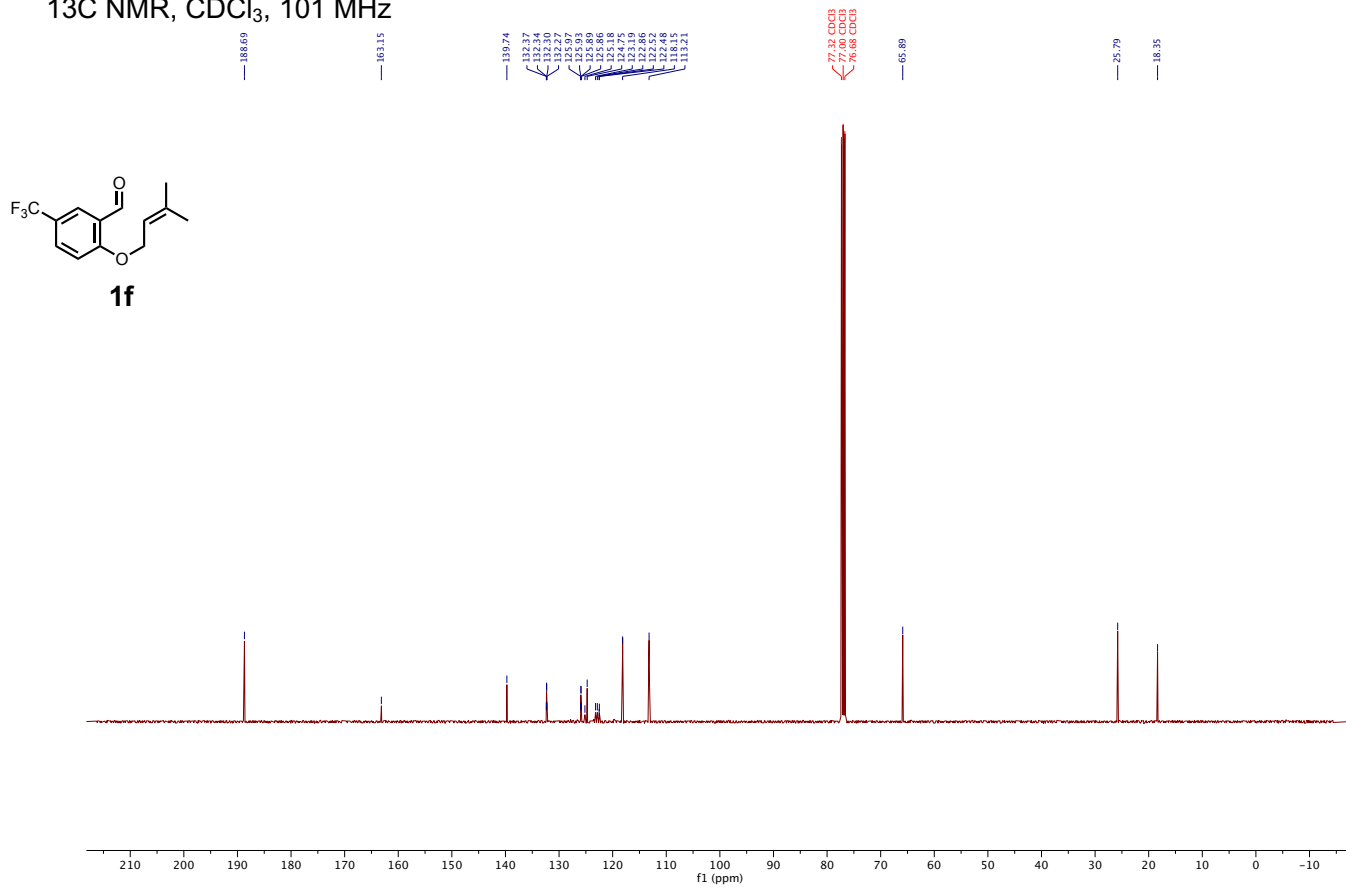

$^{19}\text{F}$  NMR,  $\text{CDCl}_3$ , 470 MHz

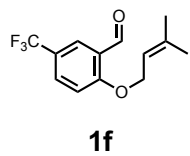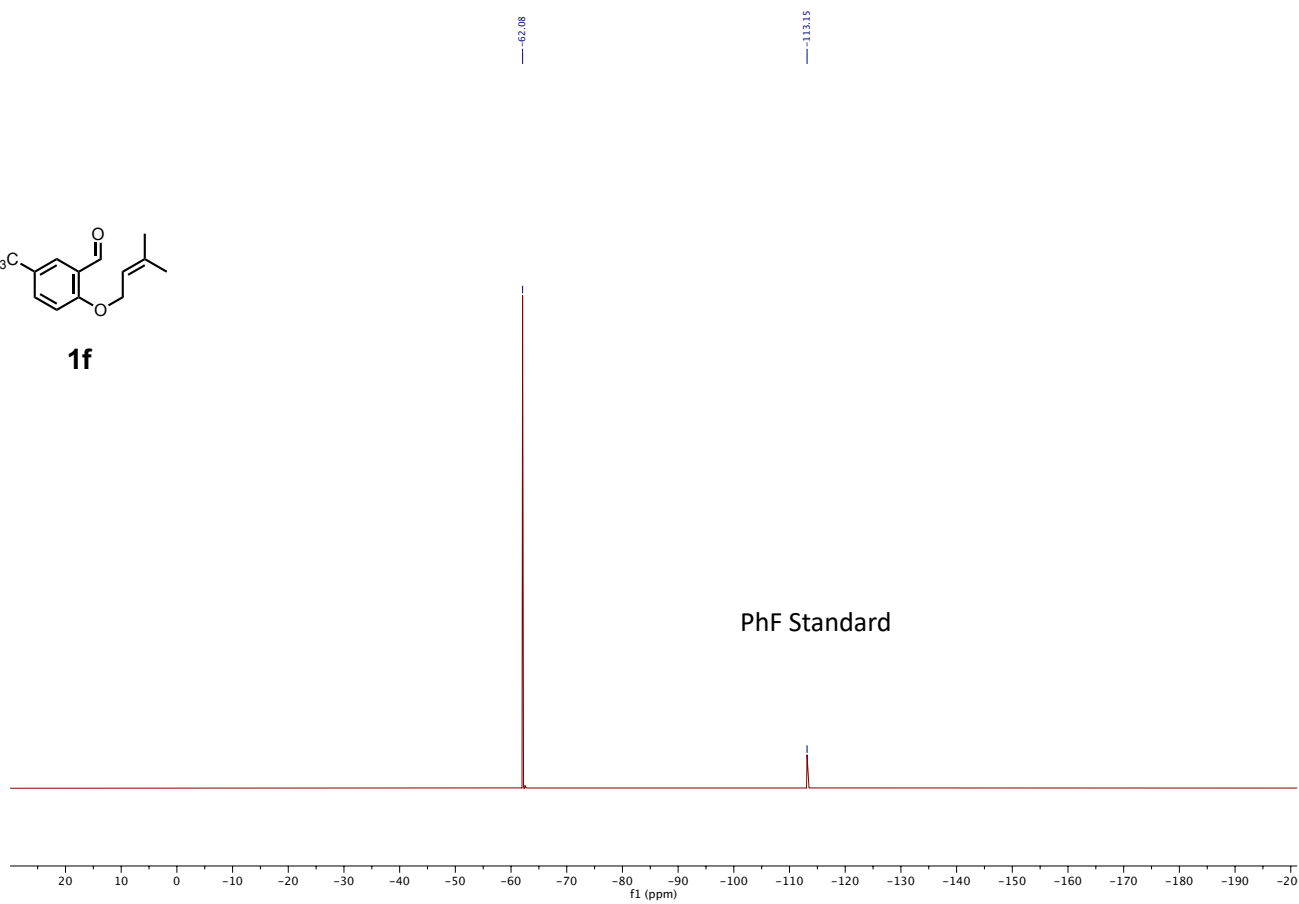



<sup>1</sup>H NMR, CDCl<sub>3</sub>, 400 MHz

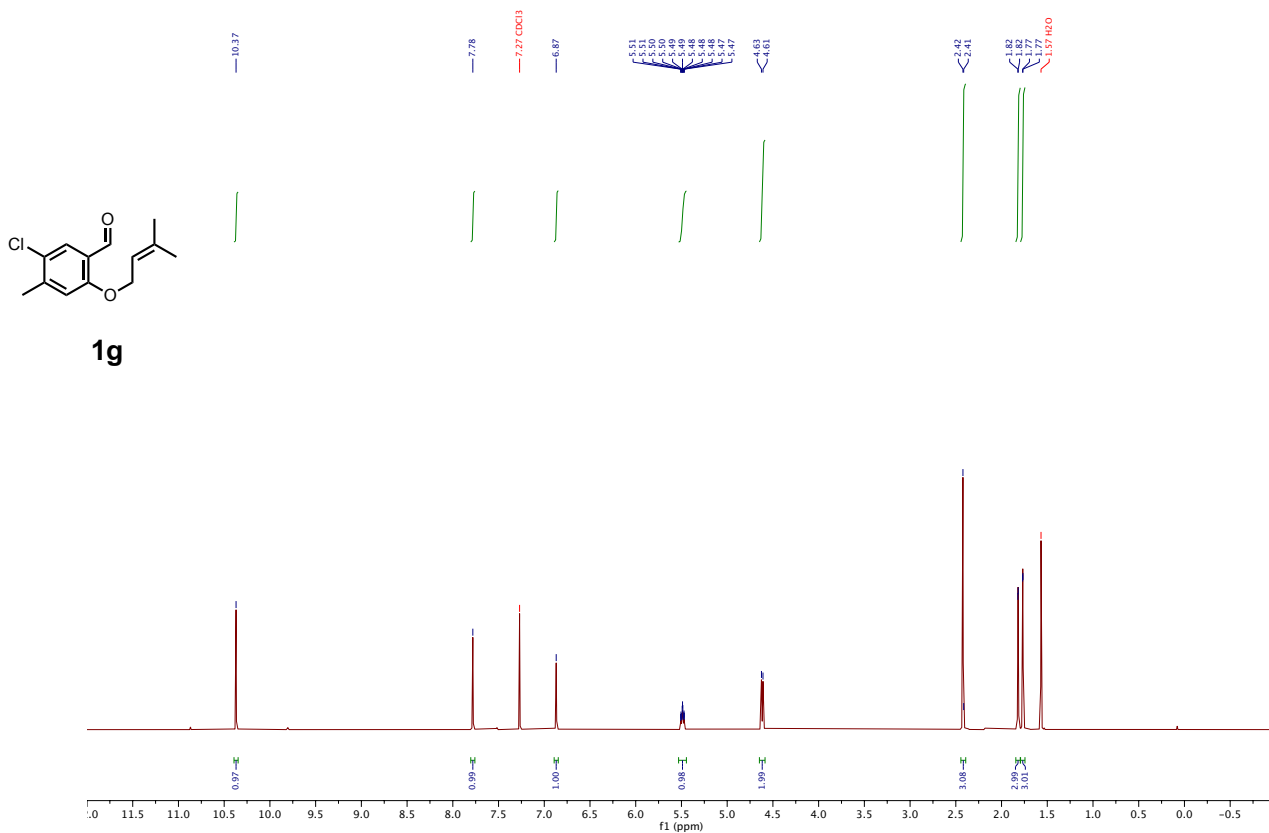

<sup>13</sup>C NMR, CDCl<sub>3</sub>, 101 MHz

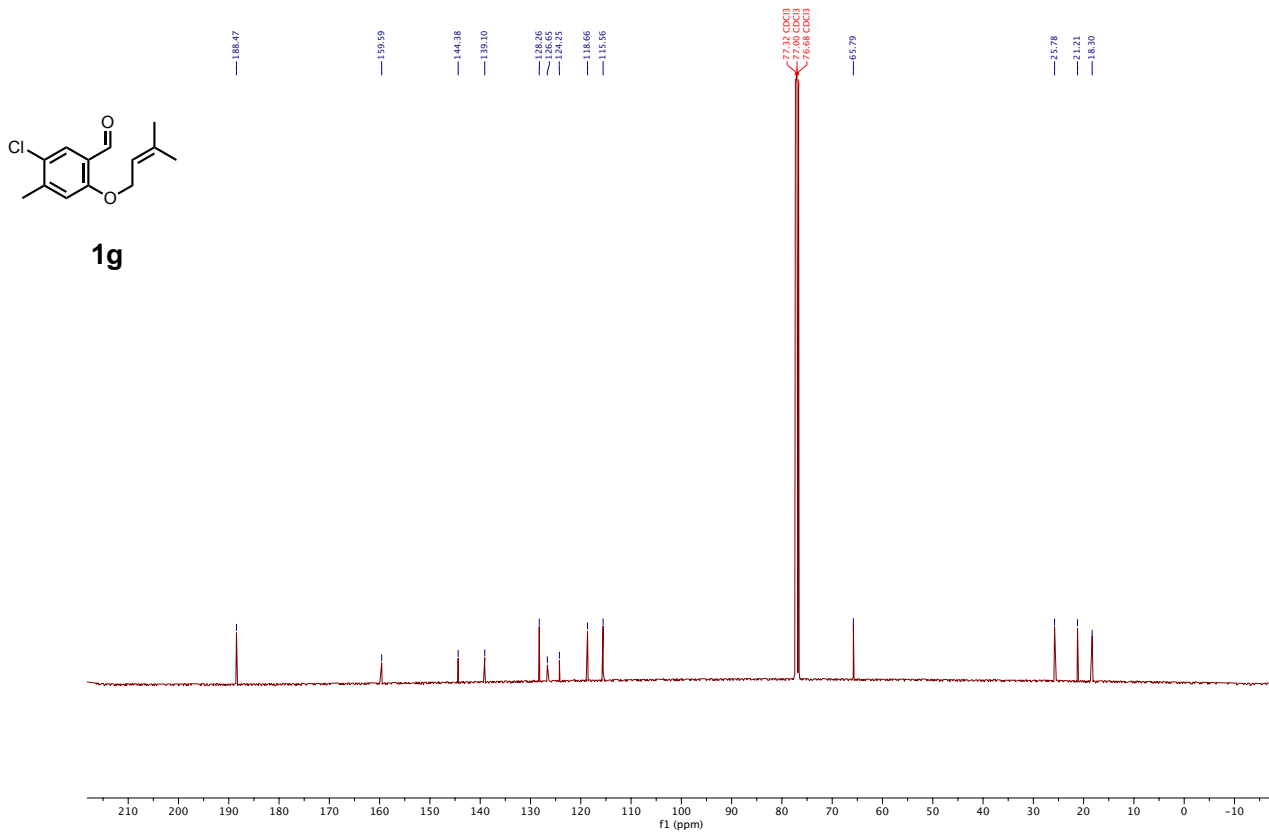

<sup>1</sup>H NMR, CDCl<sub>3</sub>, 400 MHz

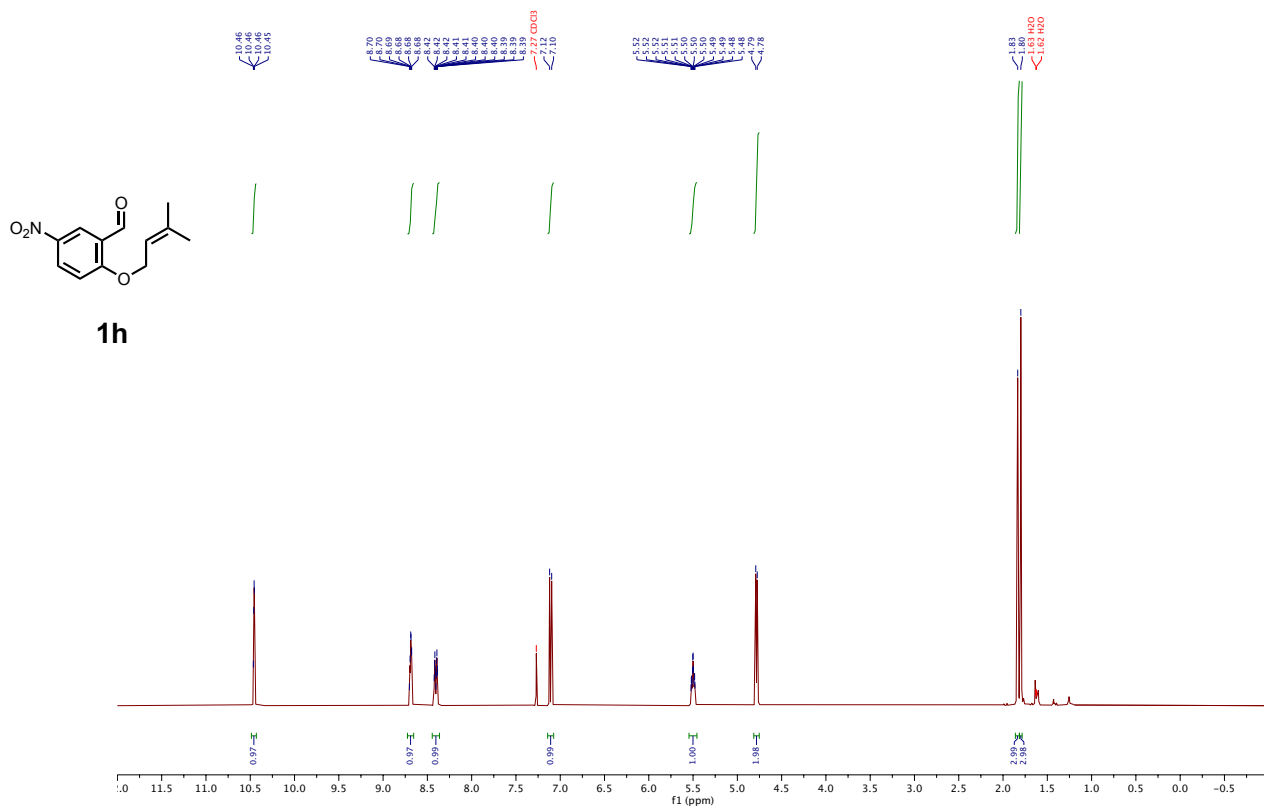

<sup>13</sup>C NMR, CDCl<sub>3</sub>, 101 MHz

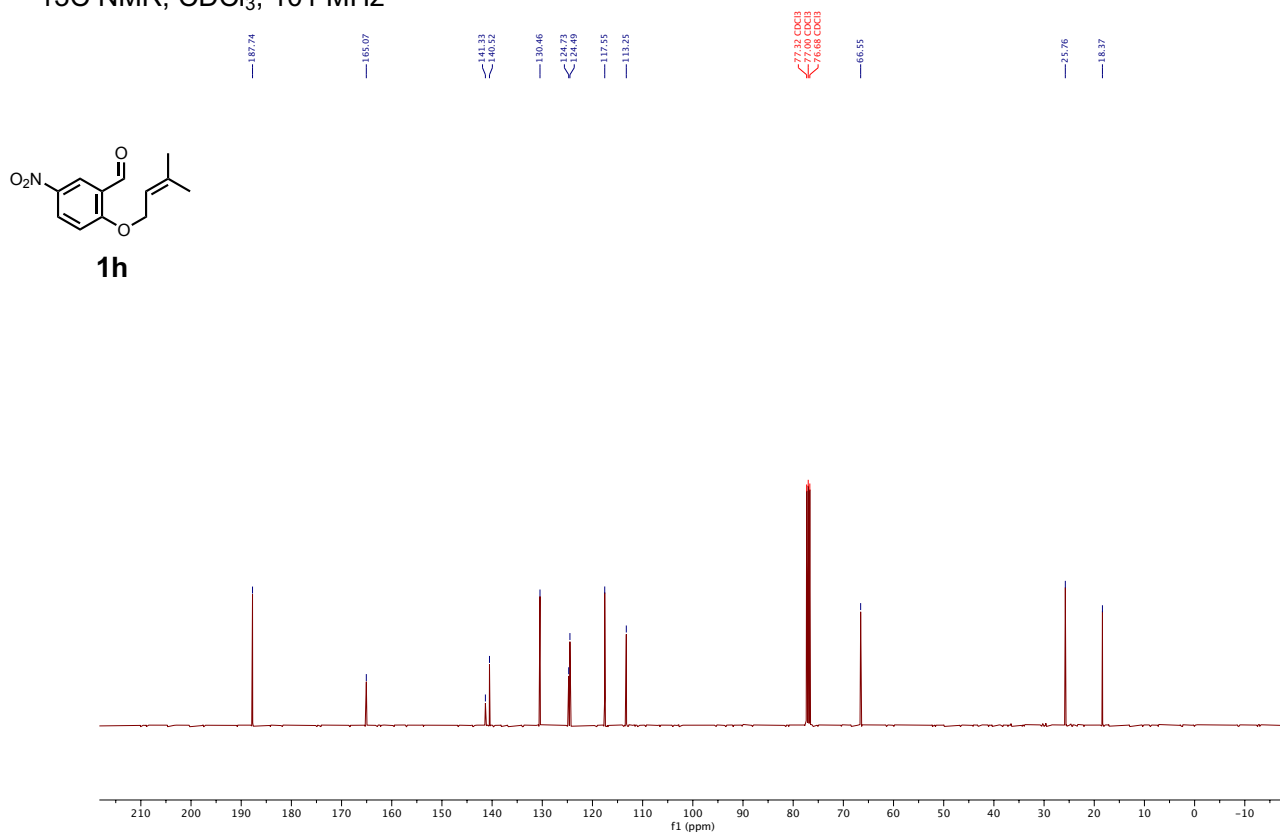

$^1\text{H}$  NMR,  $\text{CDCl}_3$ , 400 MHz

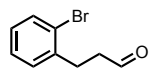

**1i-int1**

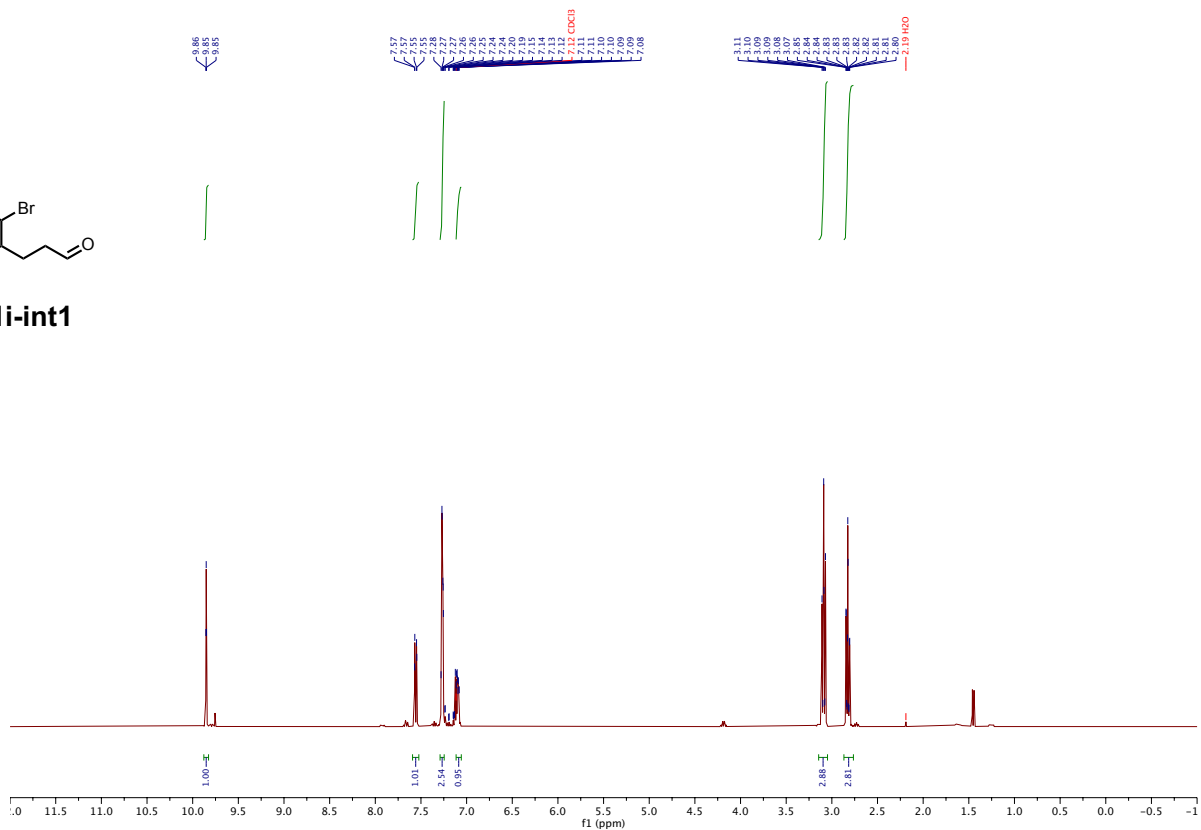

$^{13}\text{C}$  NMR,  $\text{CDCl}_3$ , 101 MHz

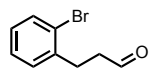

**1i-int1**

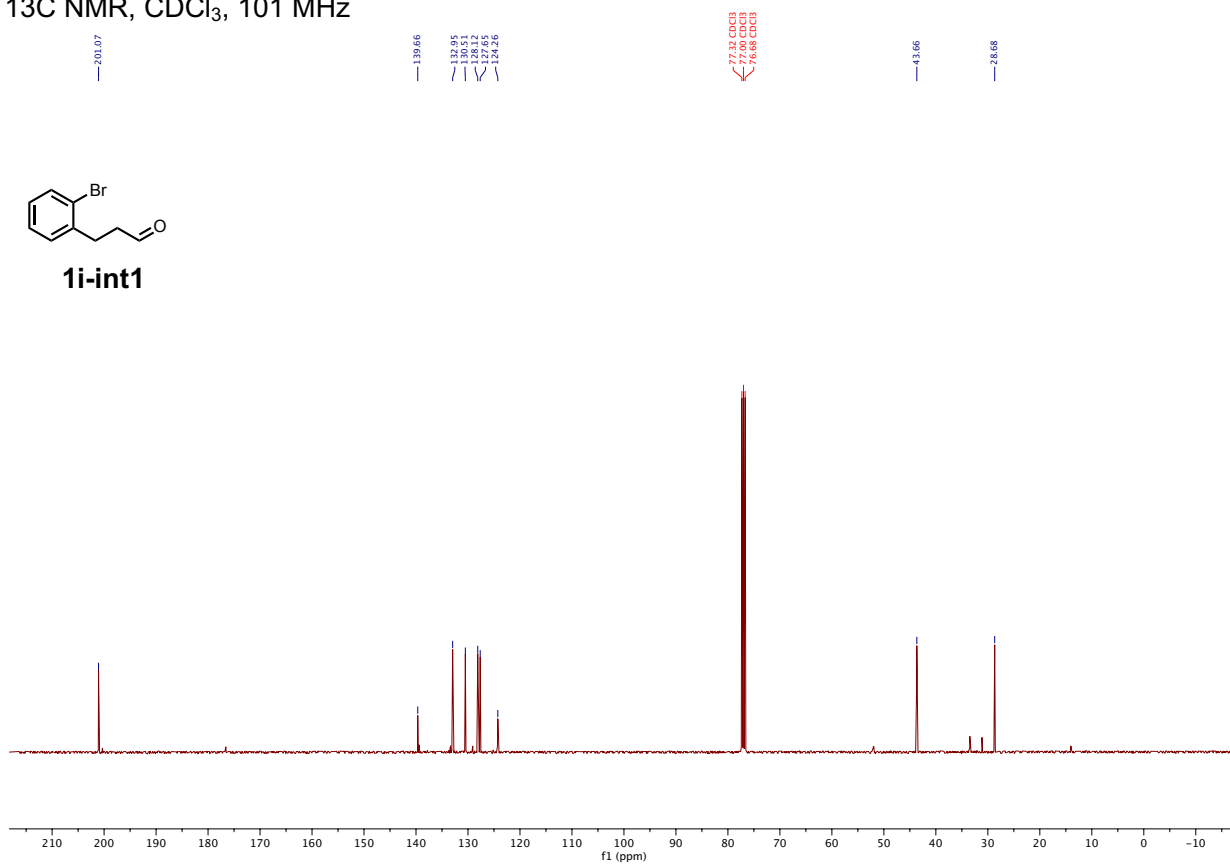

$^1\text{H}$  NMR,  $\text{CDCl}_3$ , 400 MHz

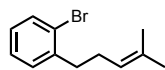

**1i-int2**

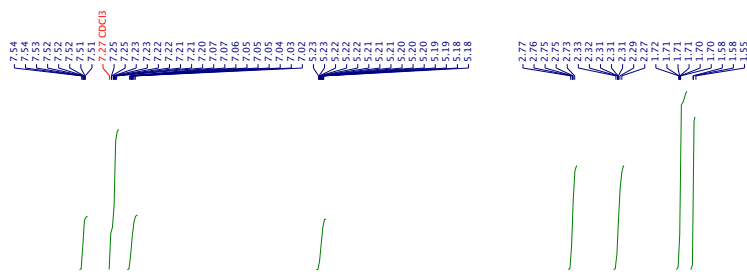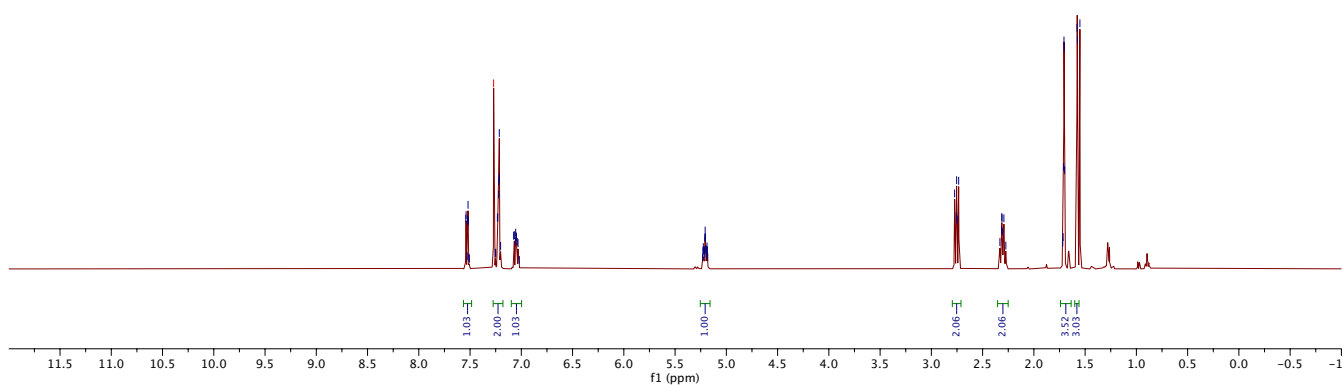

$^{13}\text{C}$  NMR,  $\text{CDCl}_3$ , 101 MHz

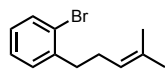

**1i-int2**

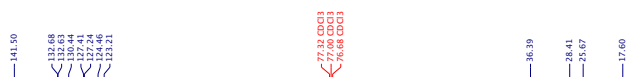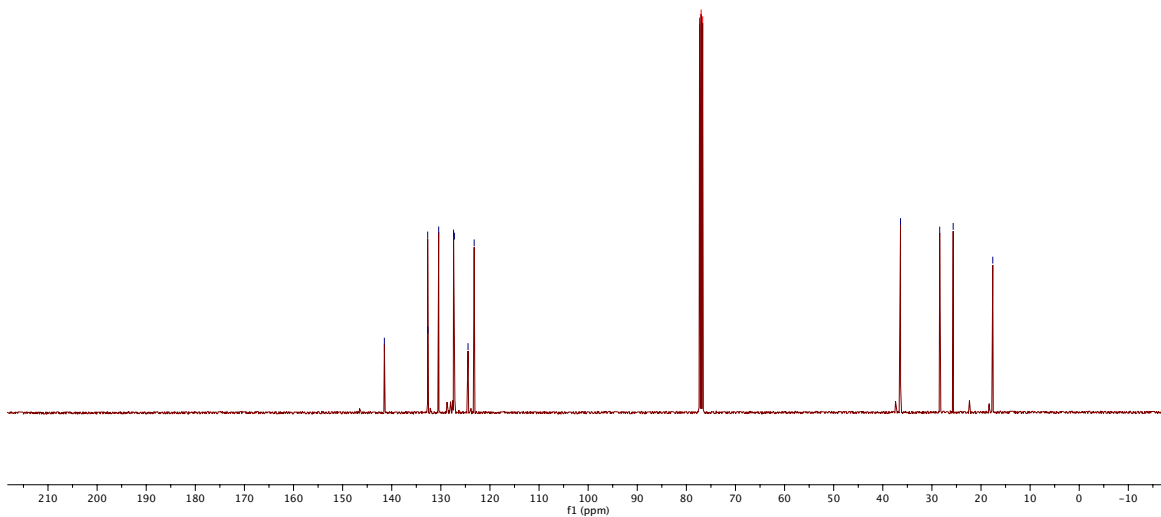

<sup>1</sup>H NMR, CDCl<sub>3</sub>, 400 MHz

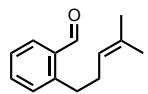

**1i**

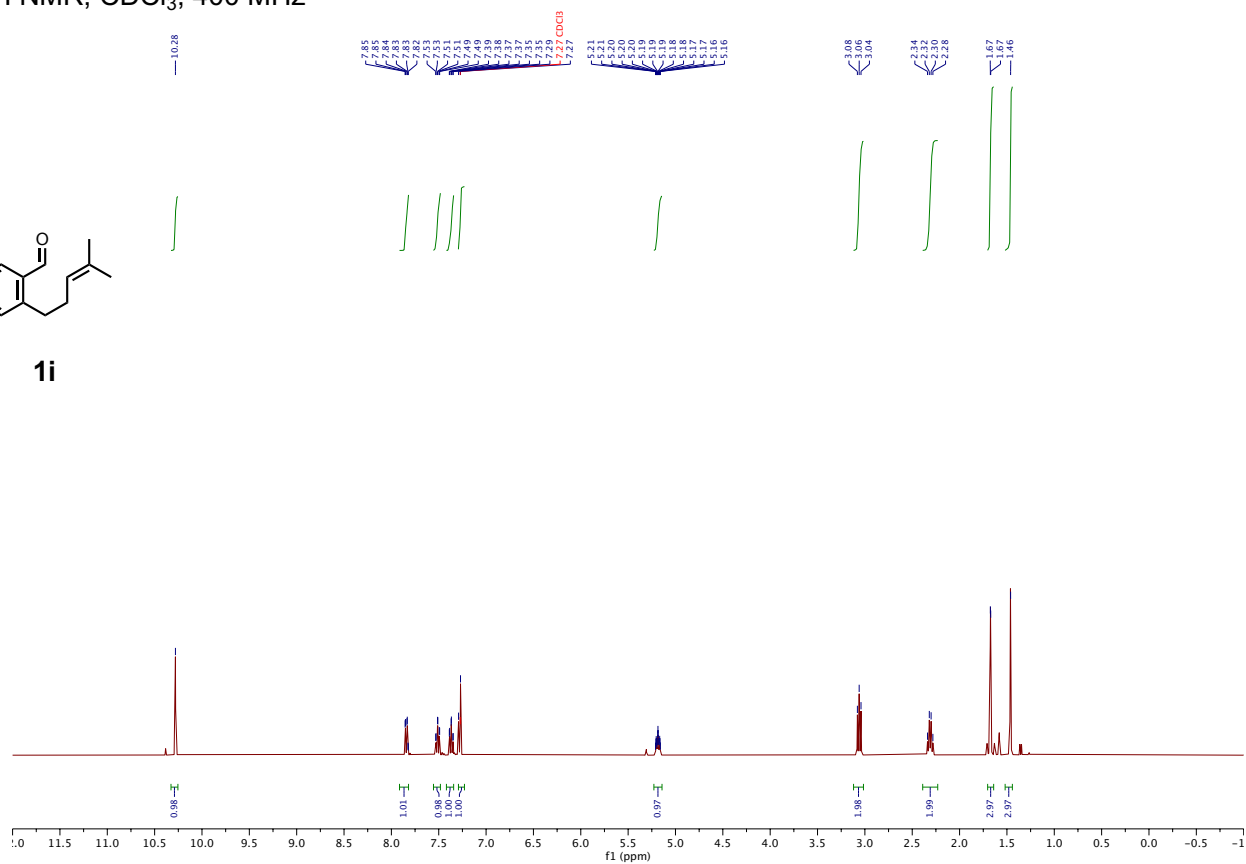

<sup>13</sup>C NMR, CDCl<sub>3</sub>, 101 MHz

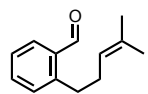

**1i**

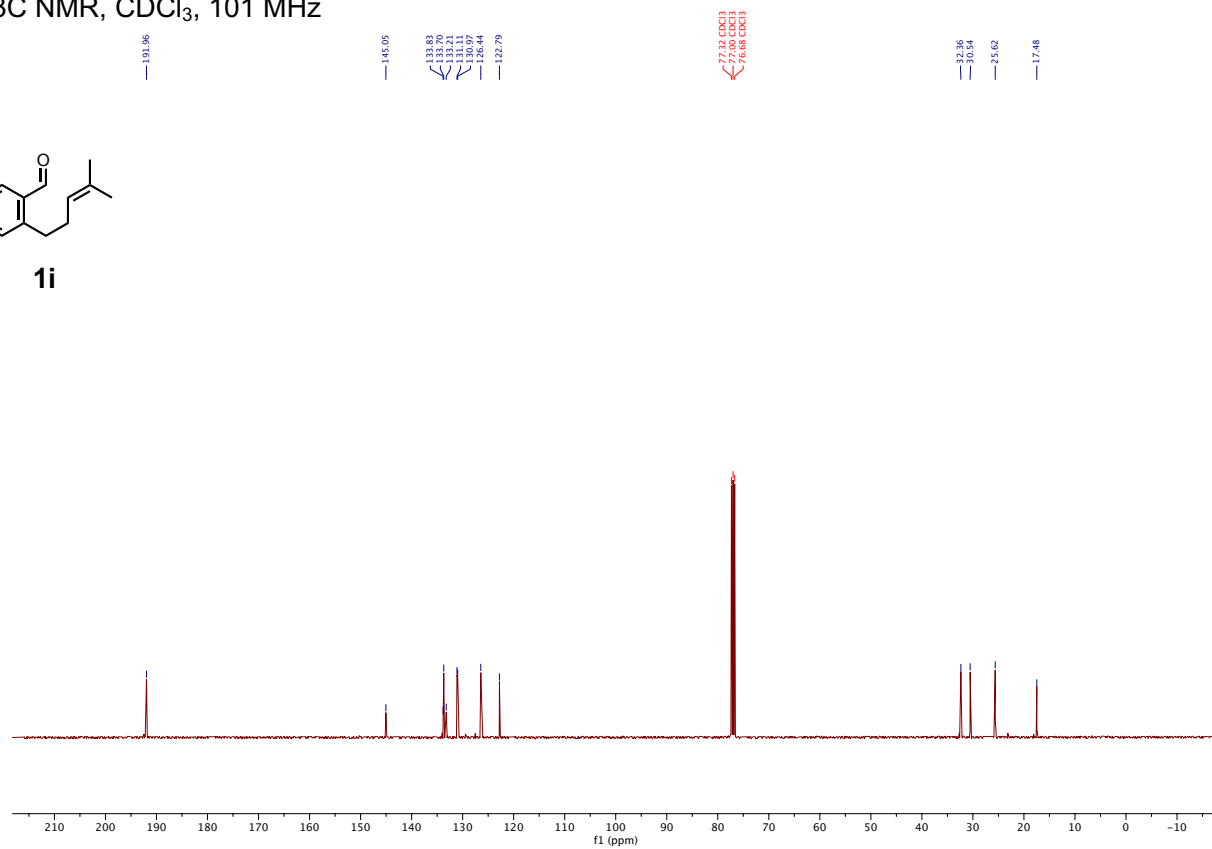

<sup>1</sup>H NMR, CDCl<sub>3</sub>, 400 MHz

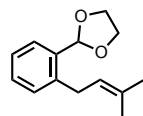

**1j-int1**

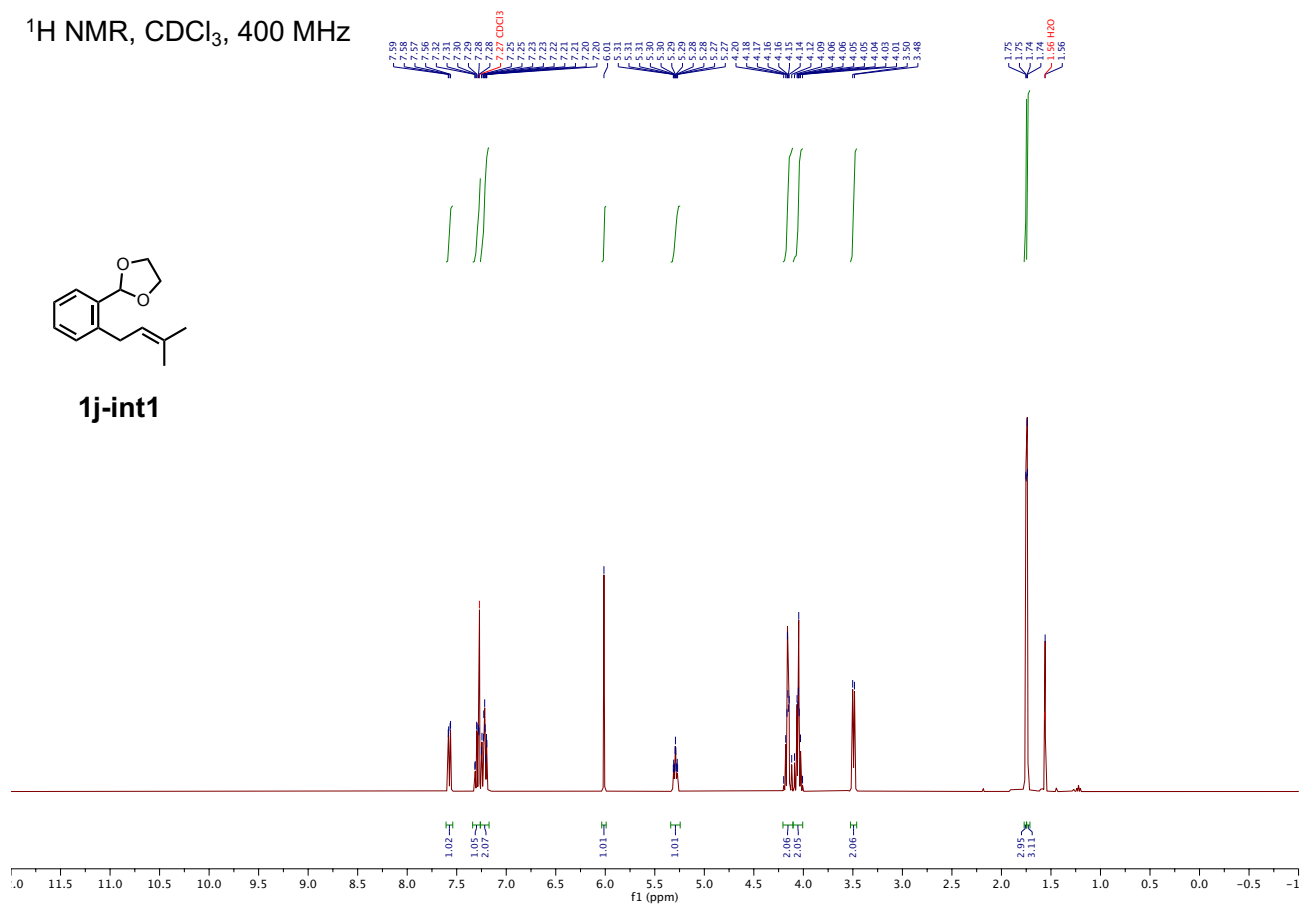

<sup>13</sup>C NMR, CDCl<sub>3</sub>, 101 MHz

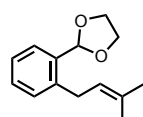

**1j-int1**

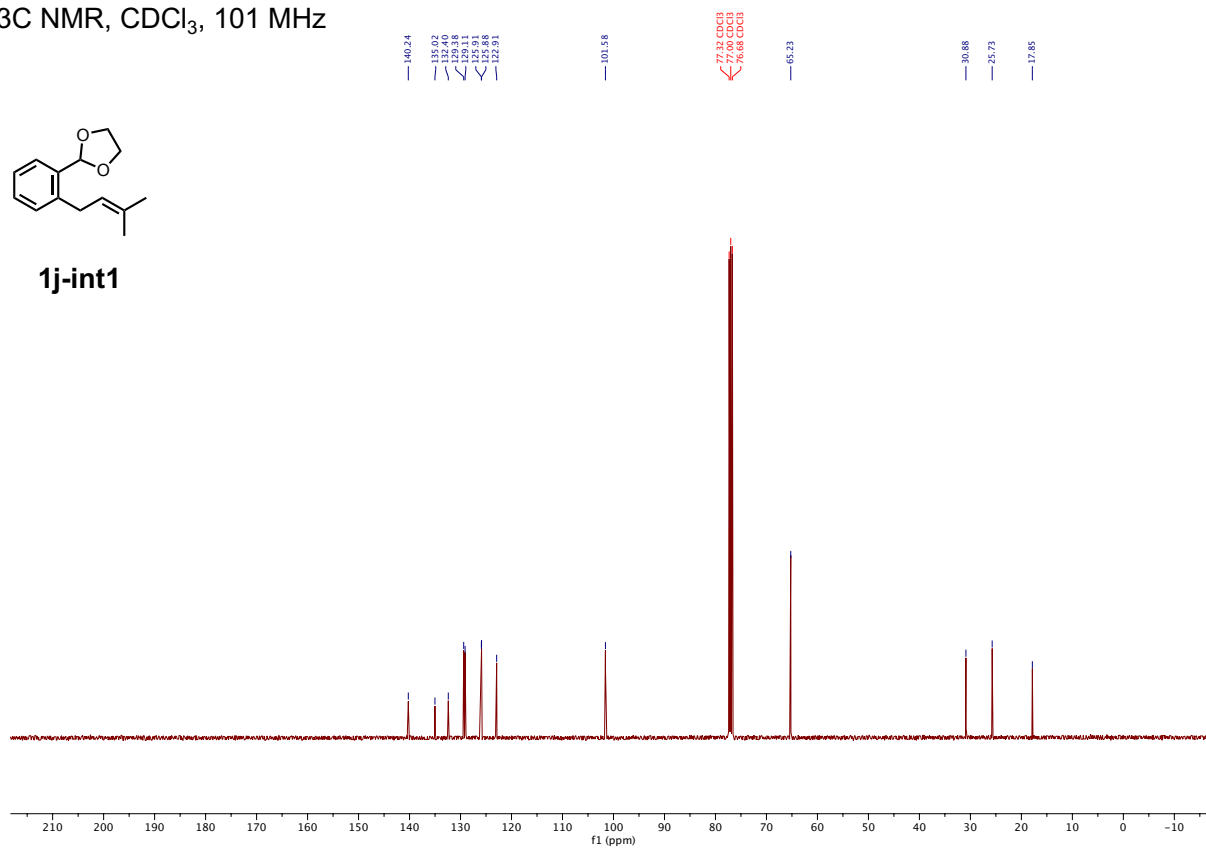

<sup>1</sup>H NMR, CDCl<sub>3</sub>, 400 MHz

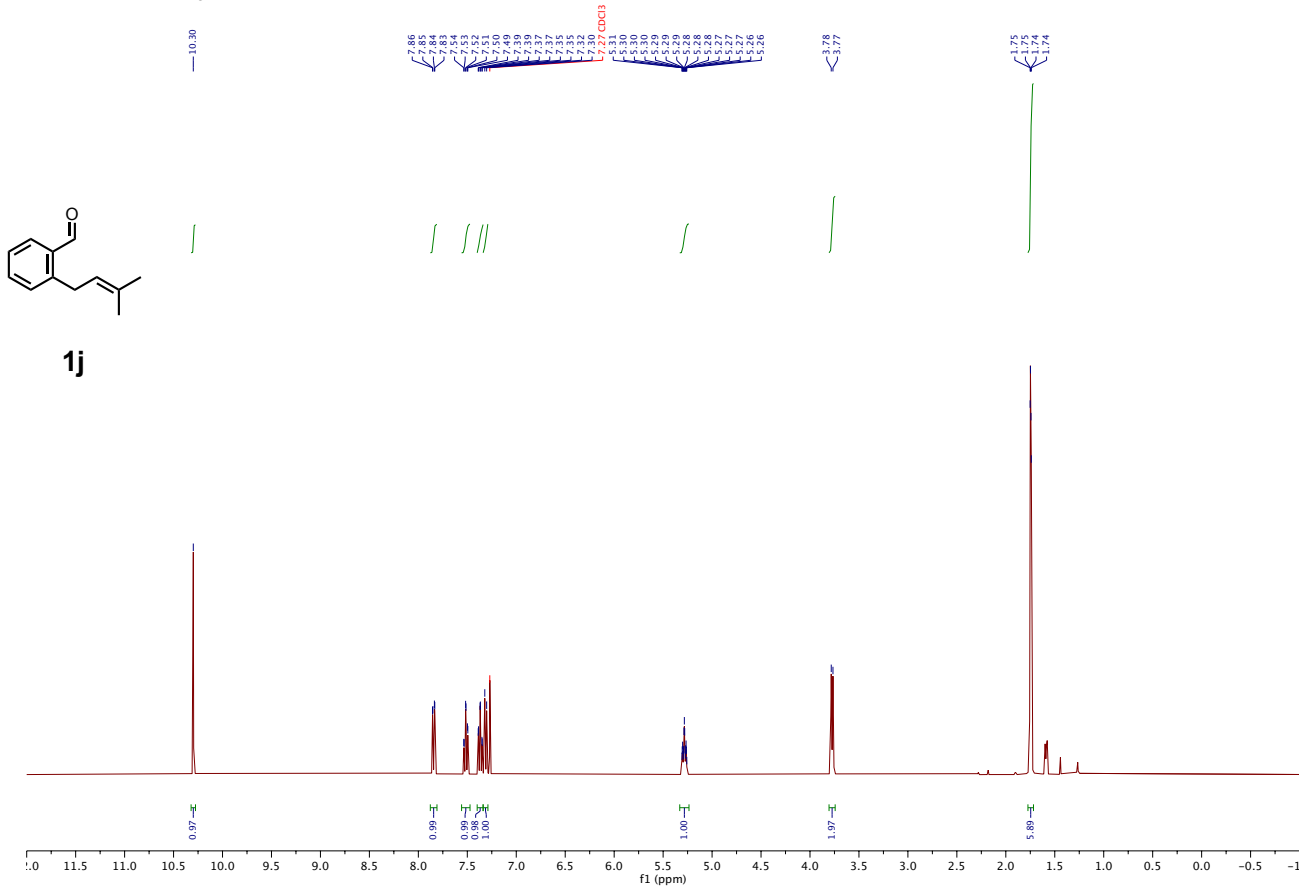

<sup>13</sup>C NMR, CDCl<sub>3</sub>, 101 MHz

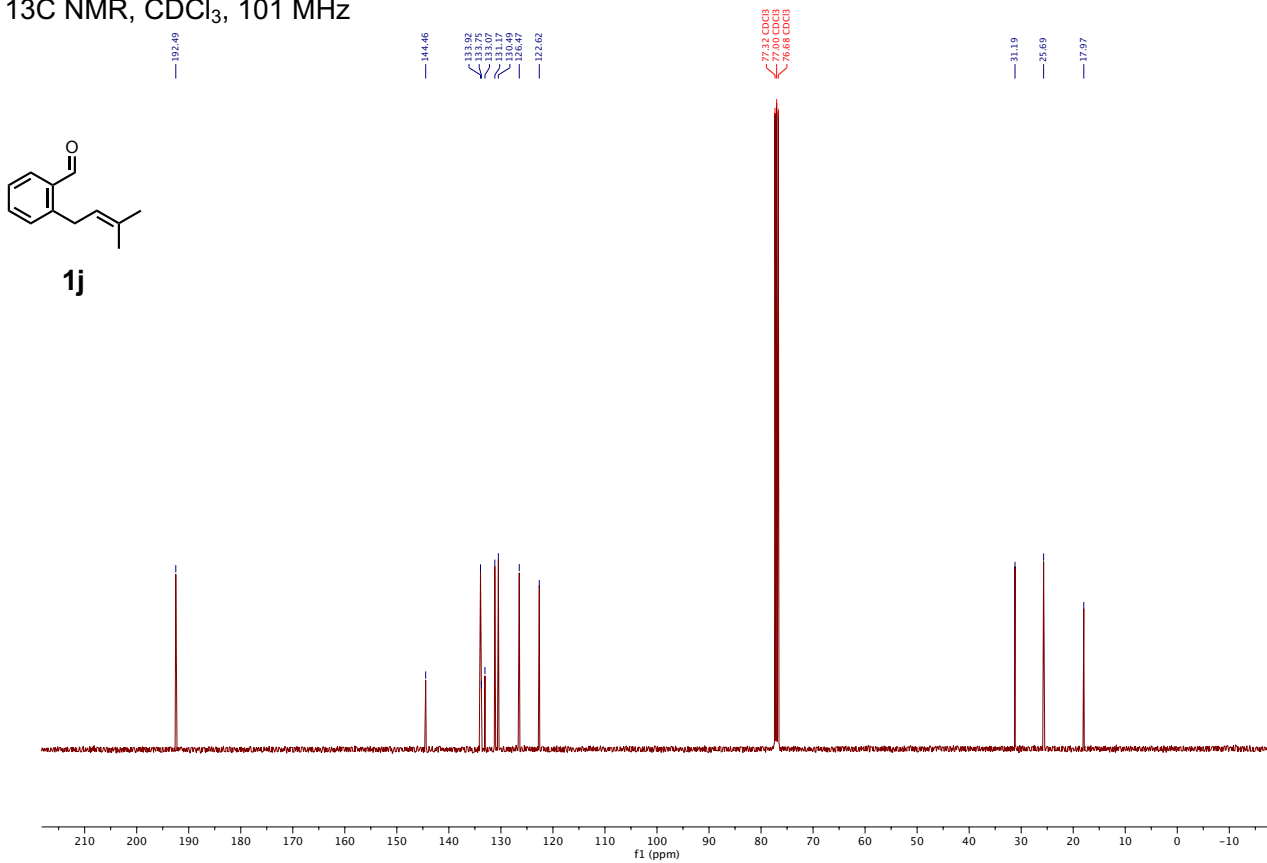

$^1\text{H}$  NMR,  $\text{CDCl}_3$ , 400 MHz

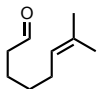

**1k**

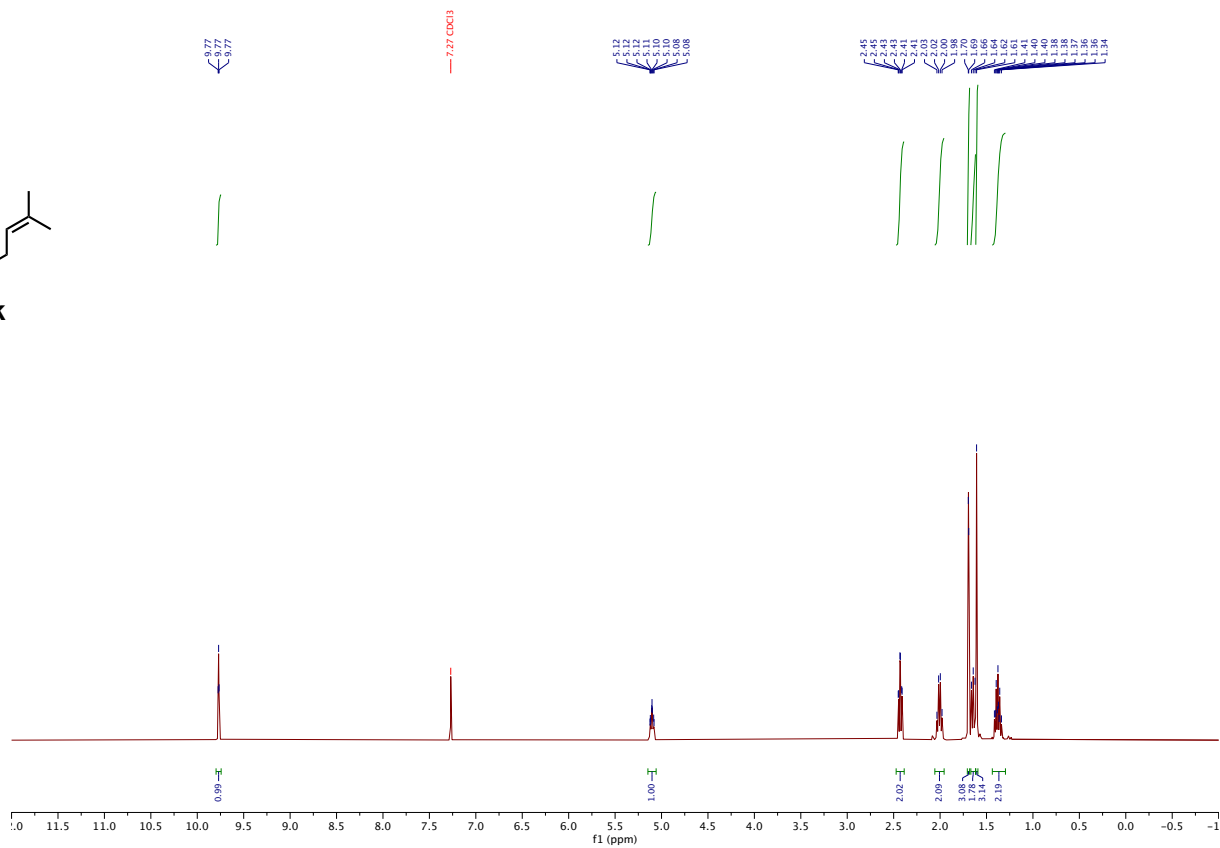

$^{13}\text{C}$  NMR,  $\text{CDCl}_3$ , 101 MHz

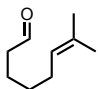

**1k**

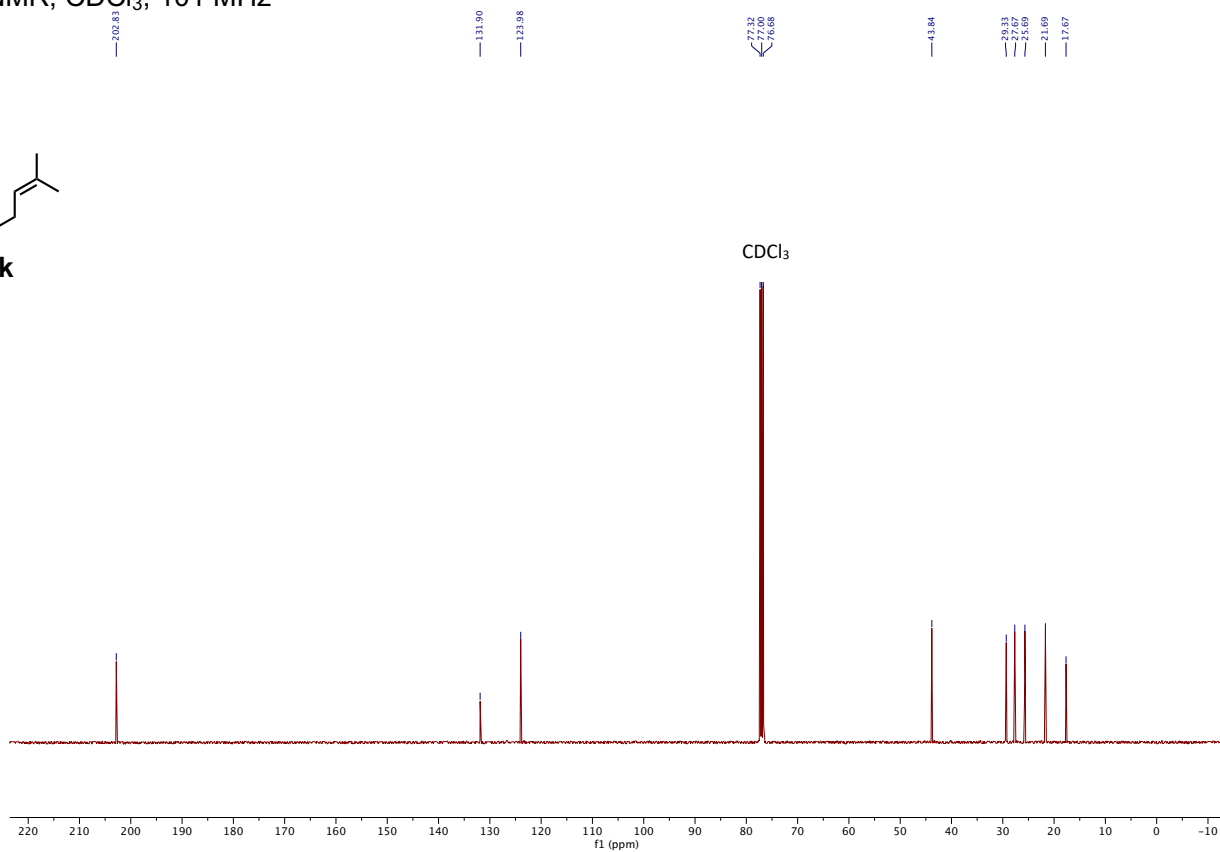



$^1\text{H}$  NMR,  $\text{CDCl}_3$ , 400 MHz

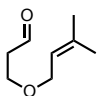

**11**

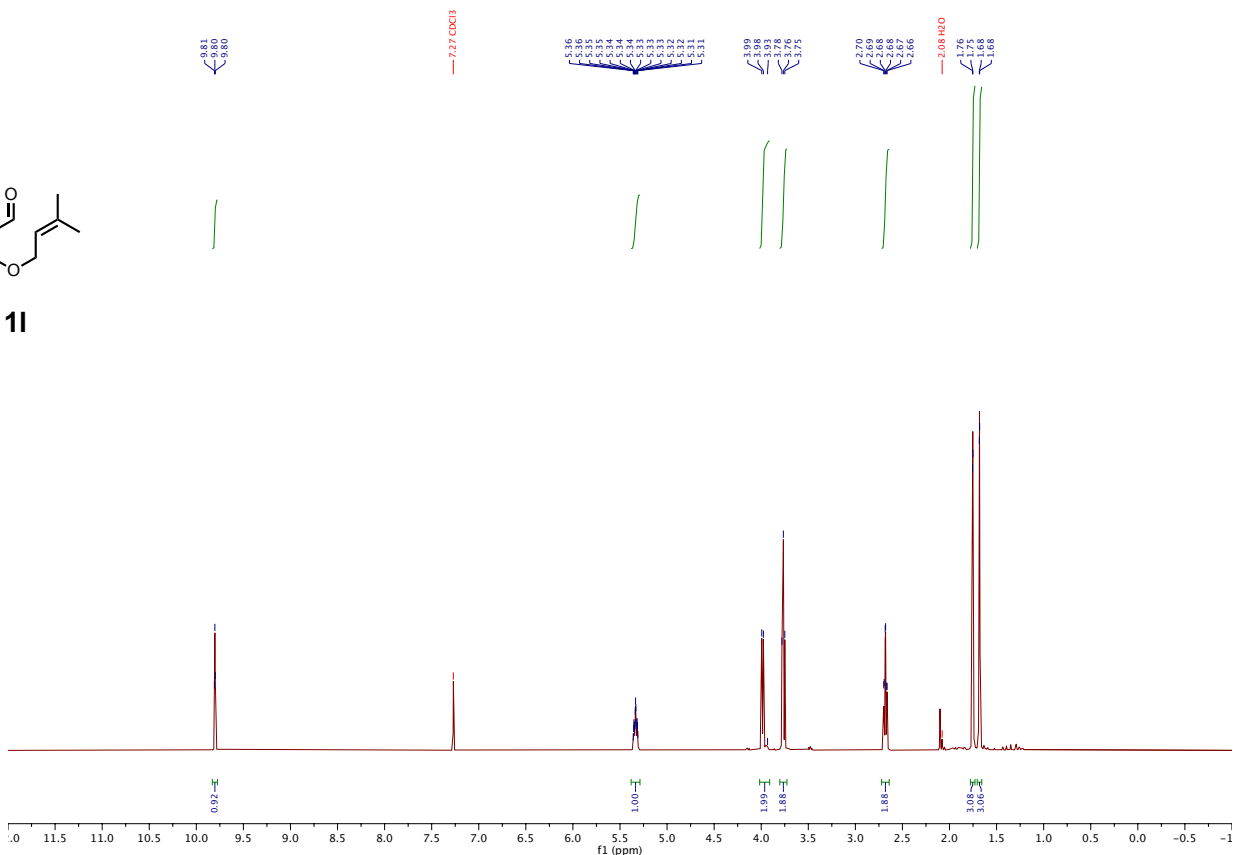

$^{13}\text{C}$  NMR,  $\text{CDCl}_3$ , 101 MHz

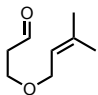

**11**

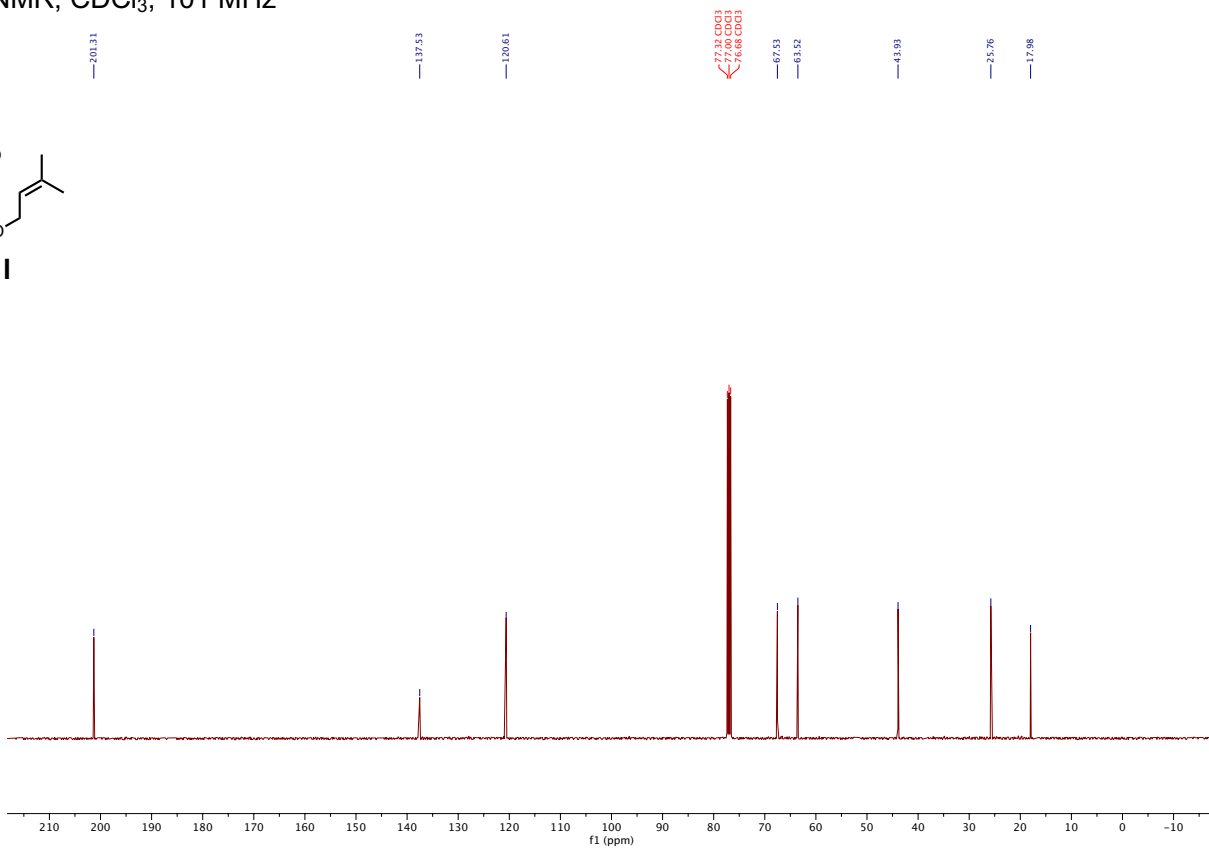

<sup>1</sup>H NMR, CDCl<sub>3</sub>, 400 MHz

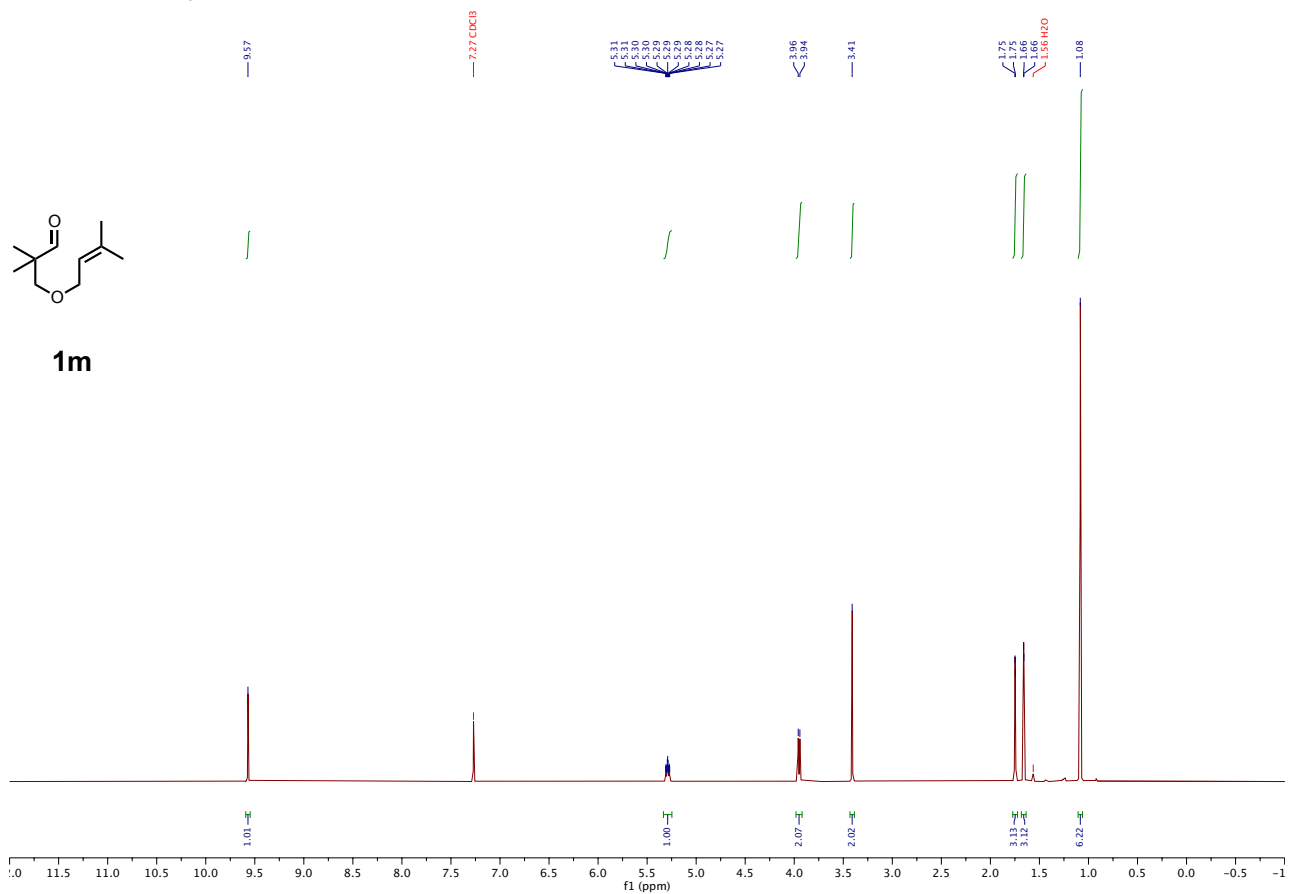

<sup>13</sup>C NMR, CDCl<sub>3</sub>, 101 MHz

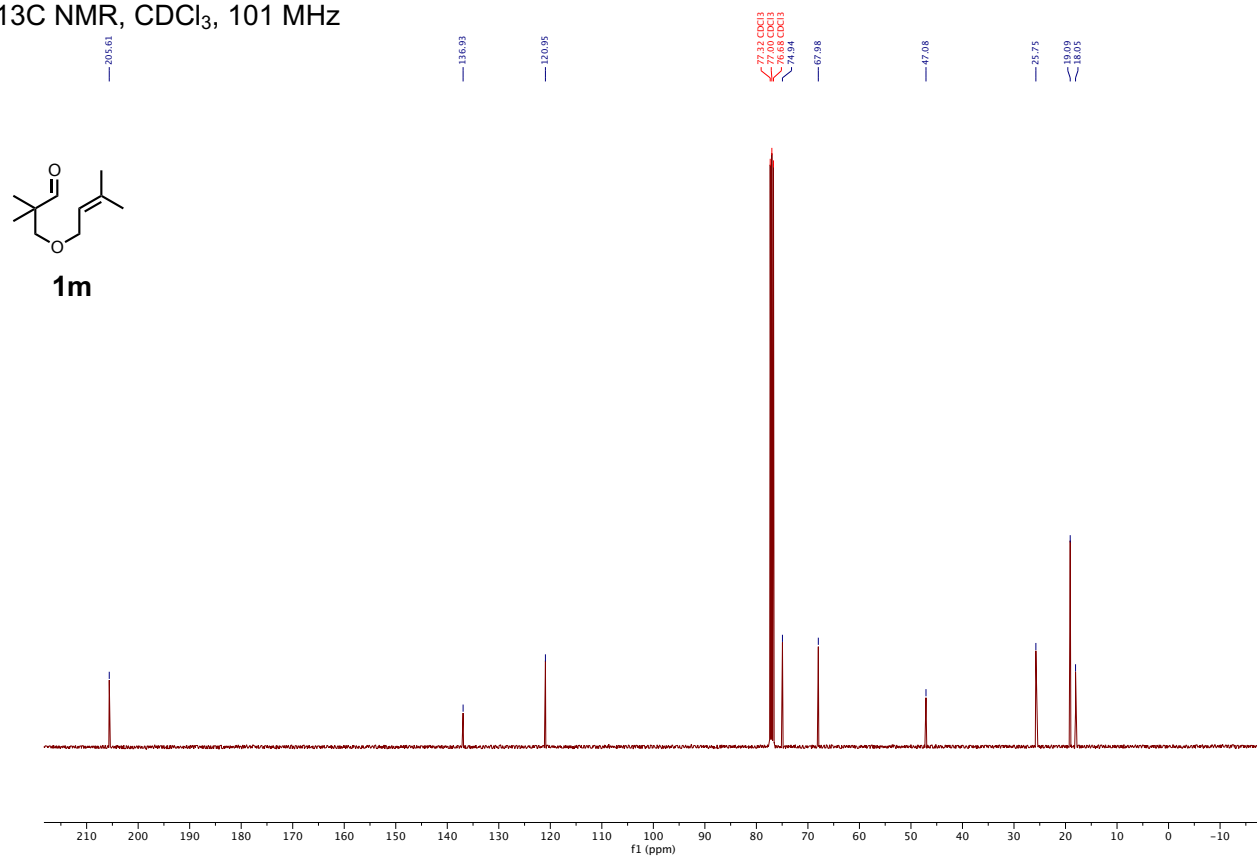

<sup>1</sup>H NMR, CDCl<sub>3</sub>, 400 MHz

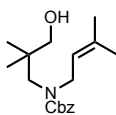

**1n-int1**

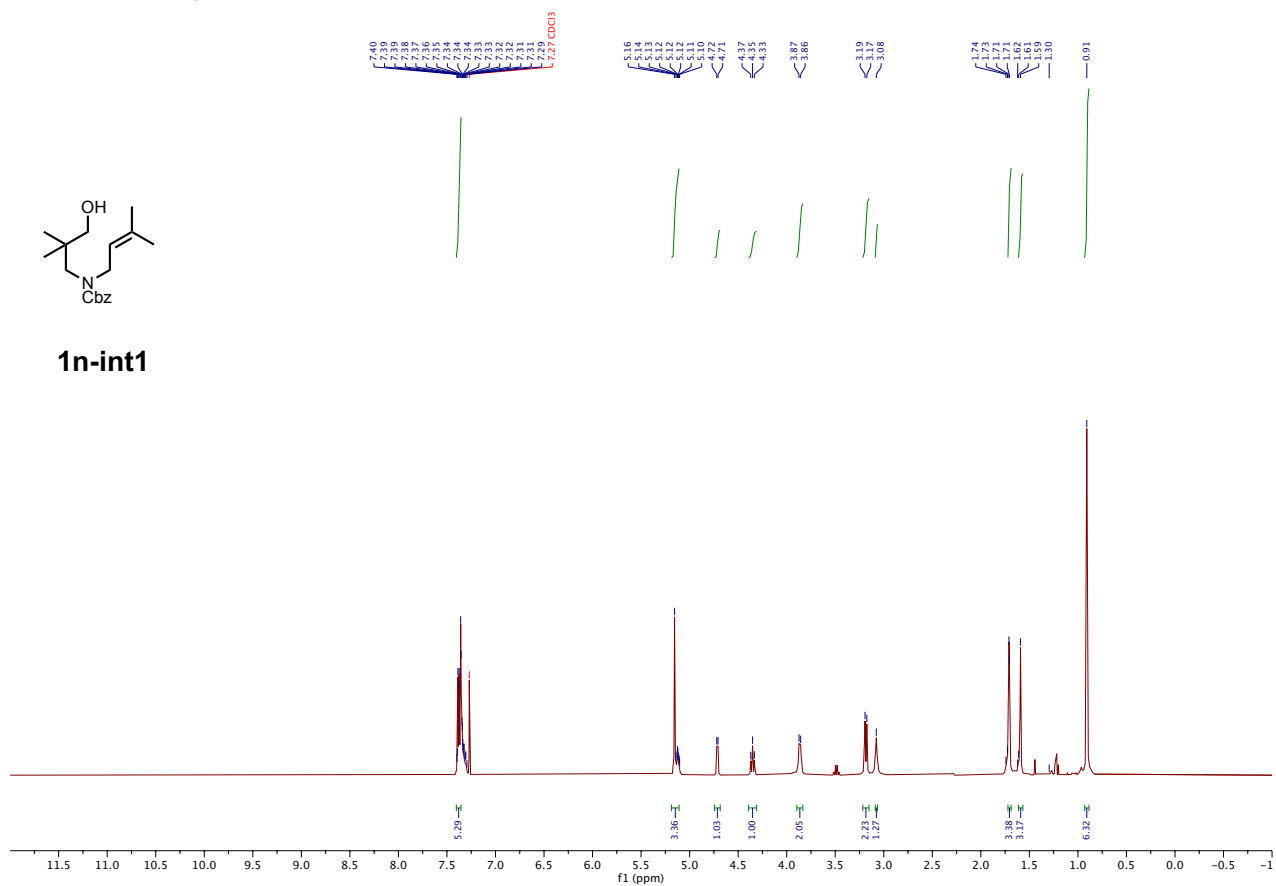

<sup>13</sup>C NMR, CDCl<sub>3</sub>, 101 MHz

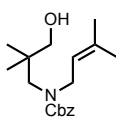

**1n-int1**

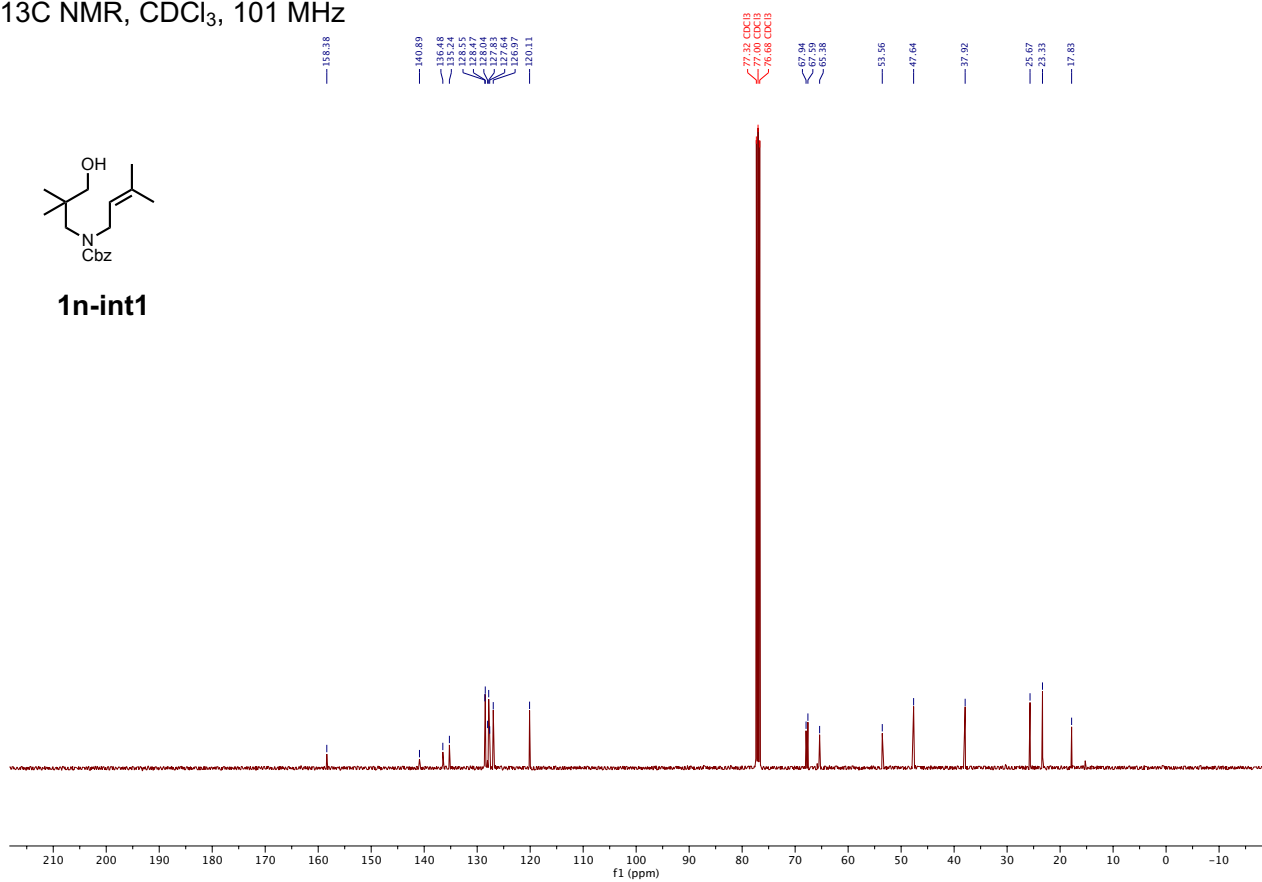

<sup>1</sup>H NMR, CDCl<sub>3</sub>, 400 MHz

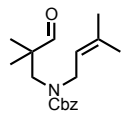

**1n**

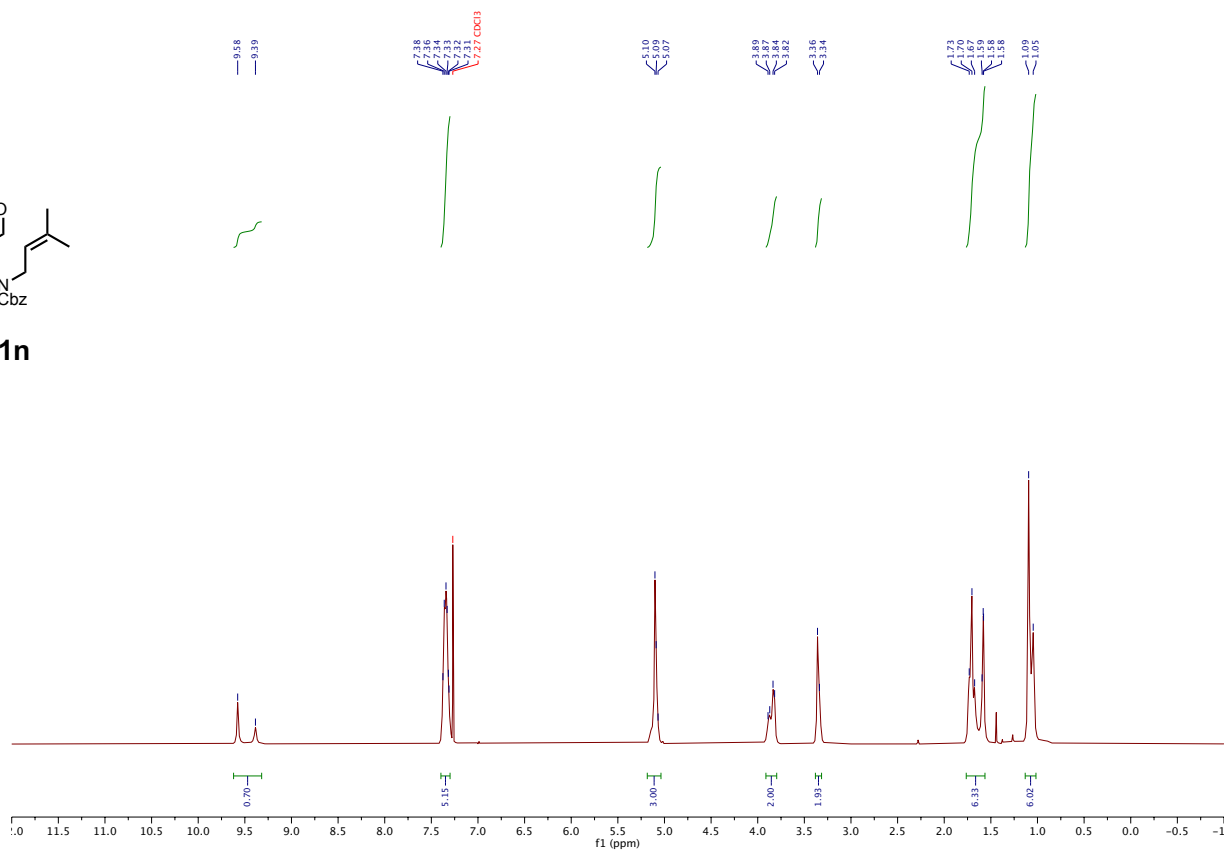

<sup>13</sup>C NMR, CDCl<sub>3</sub>, 101 MHz

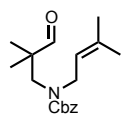

**1n**

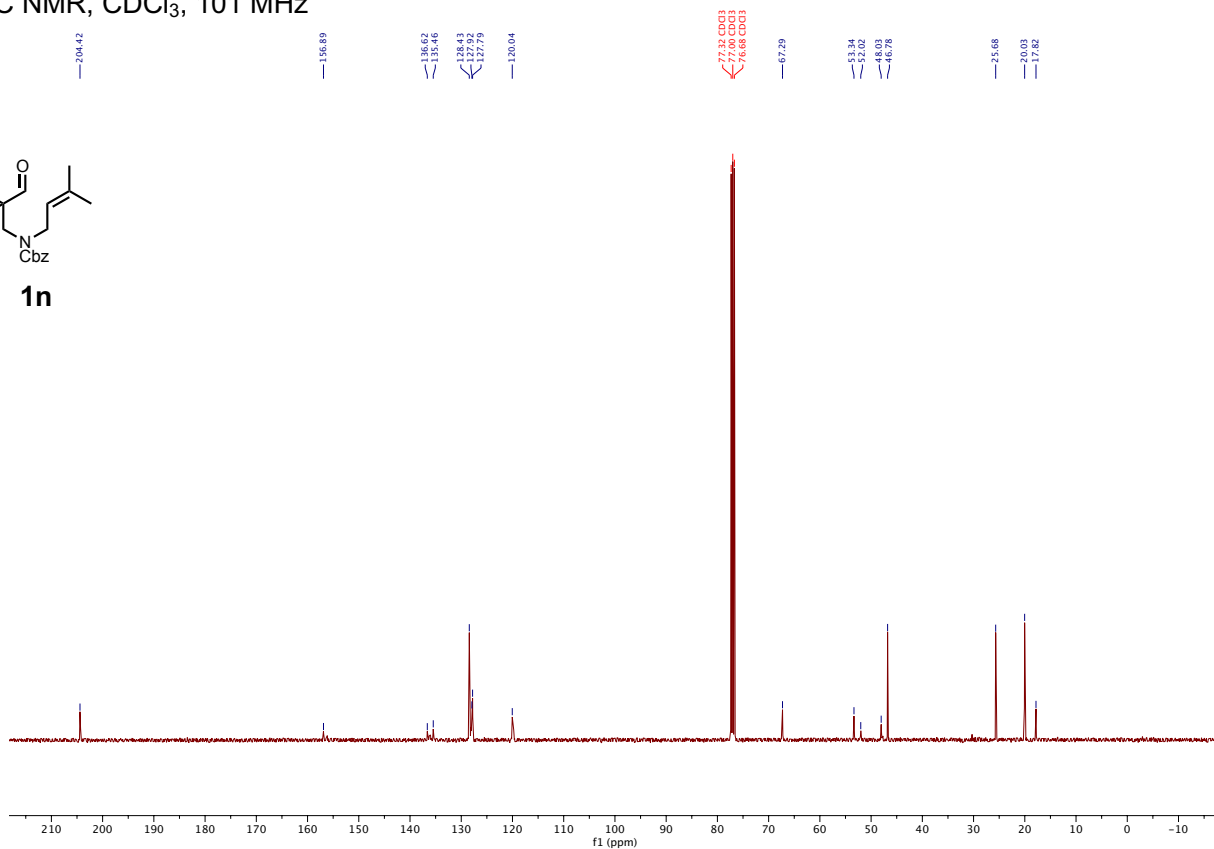

<sup>1</sup>H NMR, CDCl<sub>3</sub>, 400 MHz

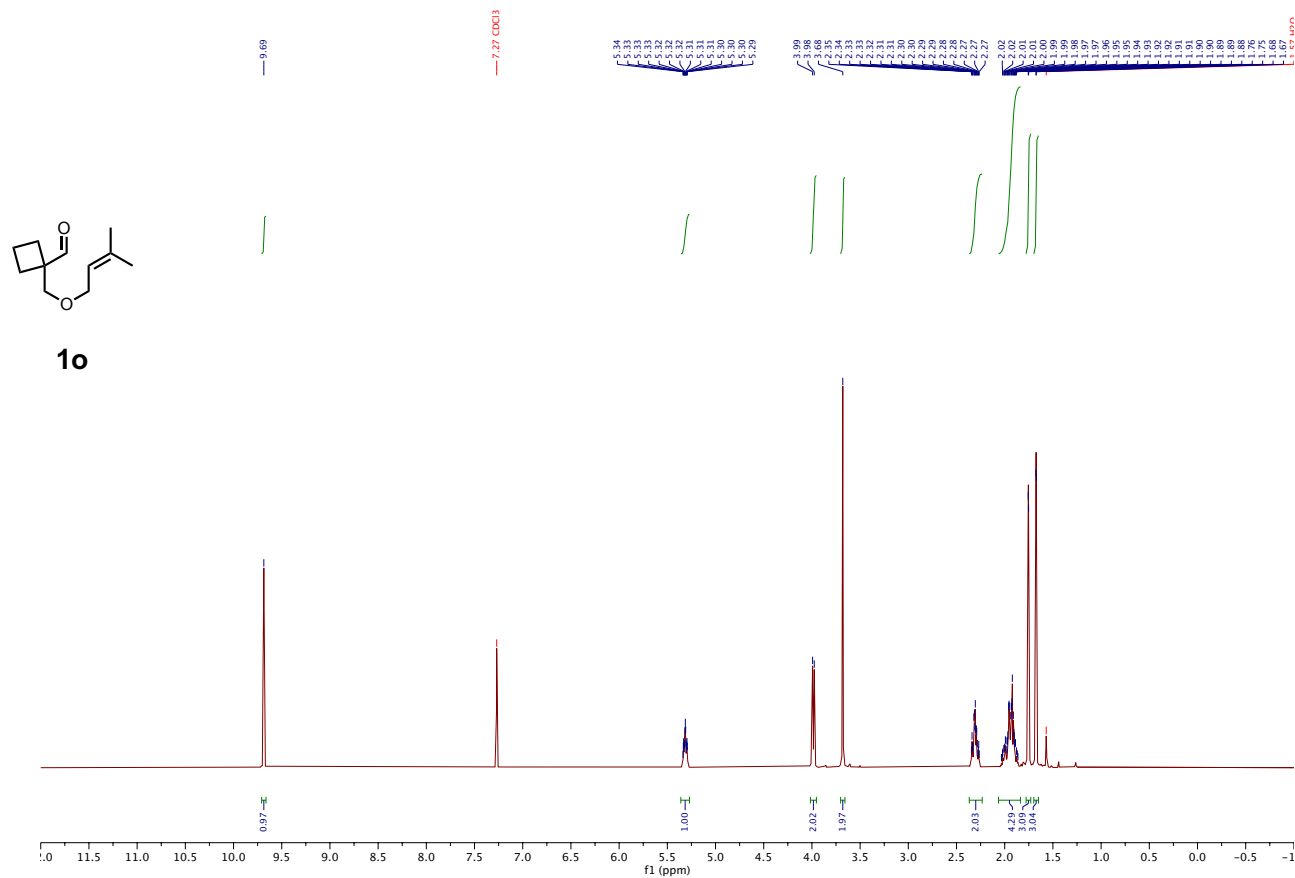

<sup>13</sup>C NMR, CDCl<sub>3</sub>, 101 MHz

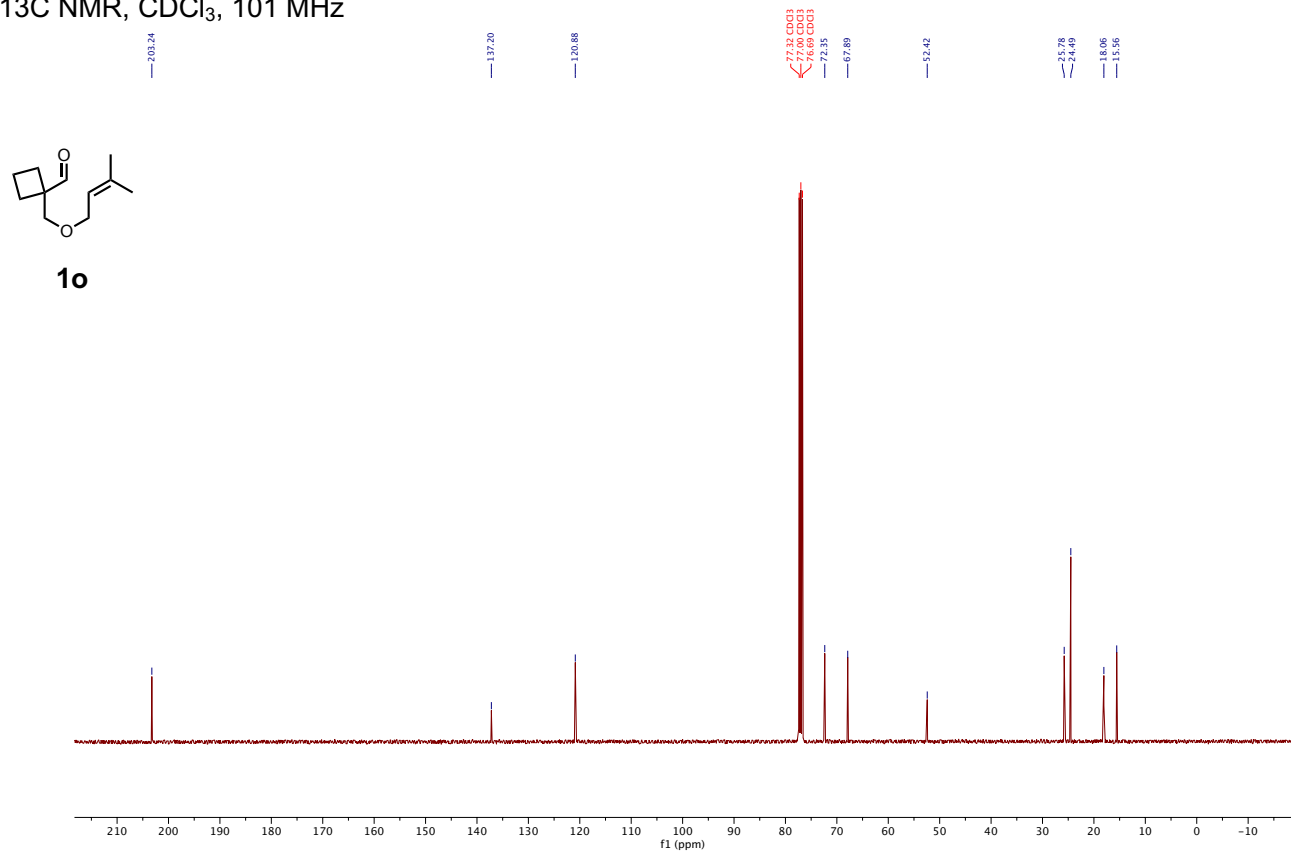

<sup>1</sup>H NMR, CDCl<sub>3</sub>, 400 MHz

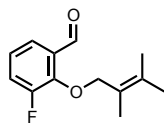

**1p**

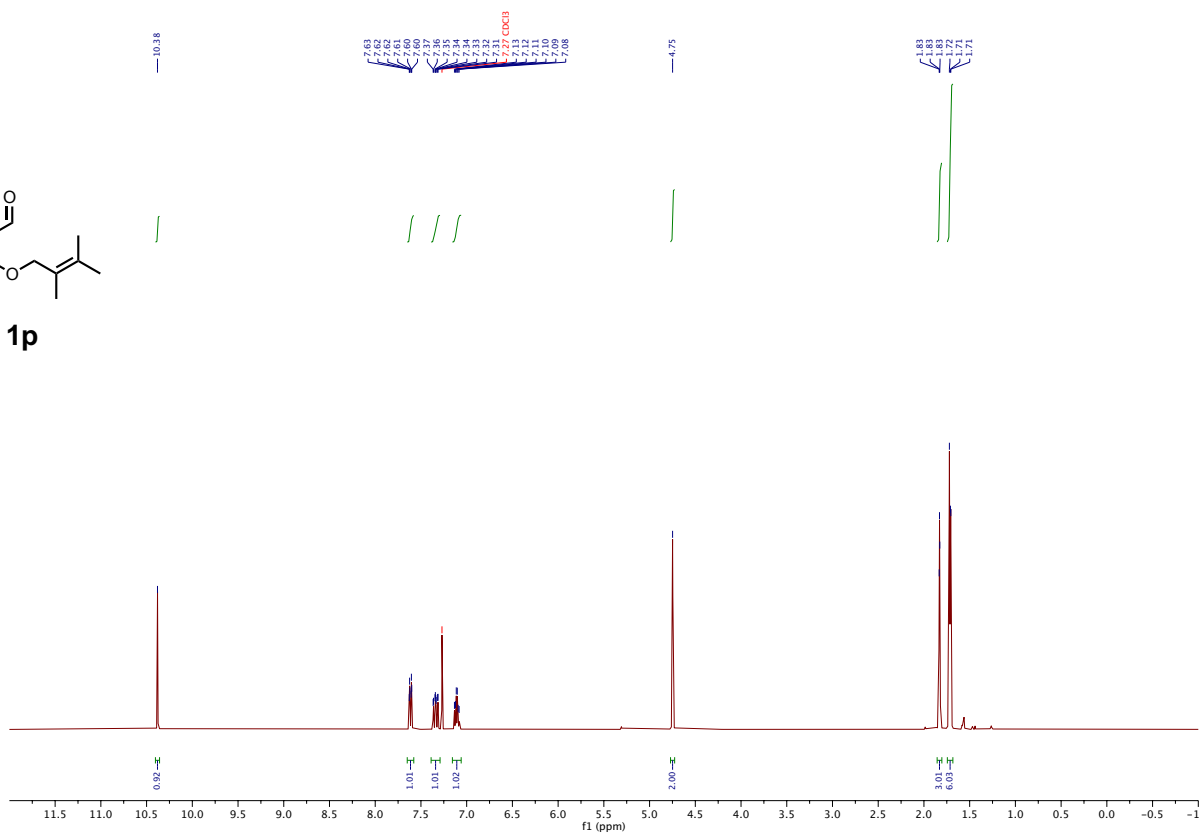

<sup>13</sup>C NMR, CDCl<sub>3</sub>, 101 MHz

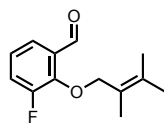

**1p**

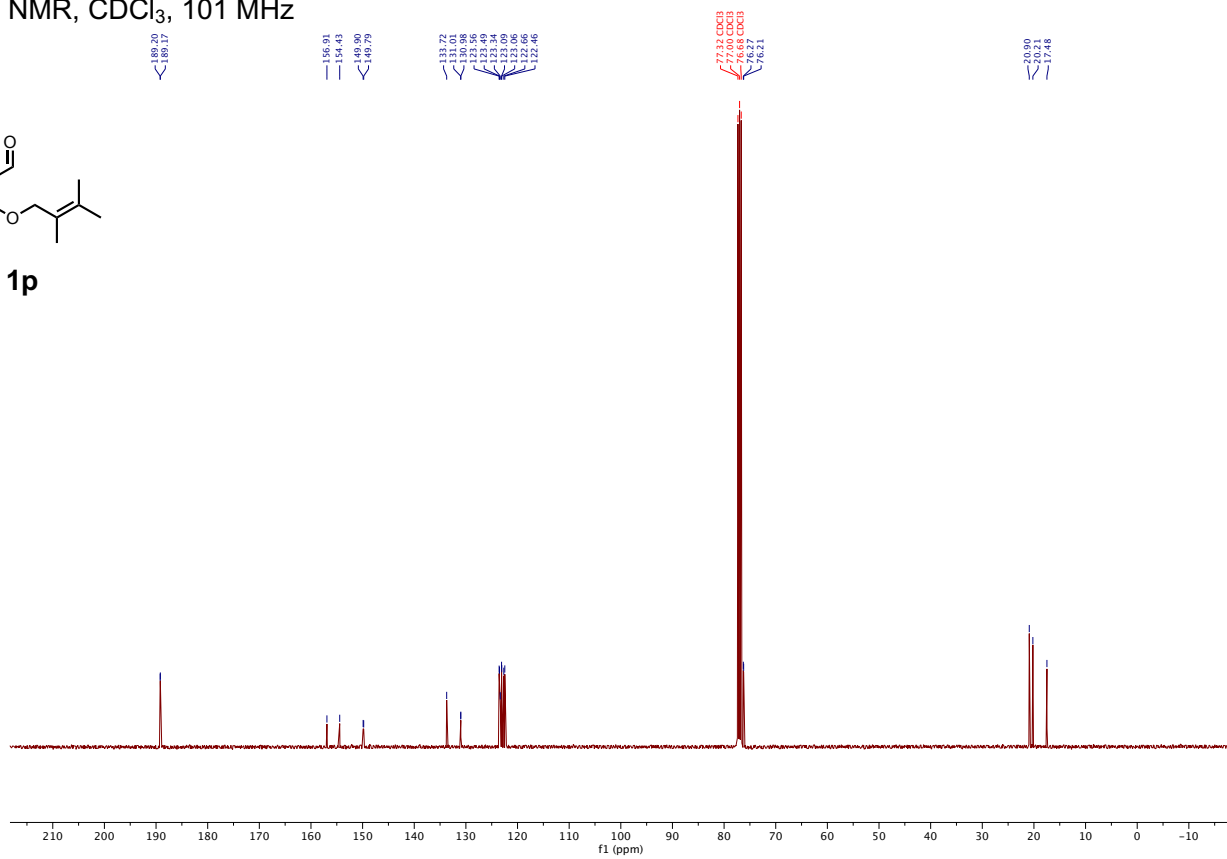

$^{19}\text{F}$  NMR,  $\text{CDCl}_3$ , 376 MHz

-63.72

-129.45



**1p**

$\text{PhCF}_3$  standard

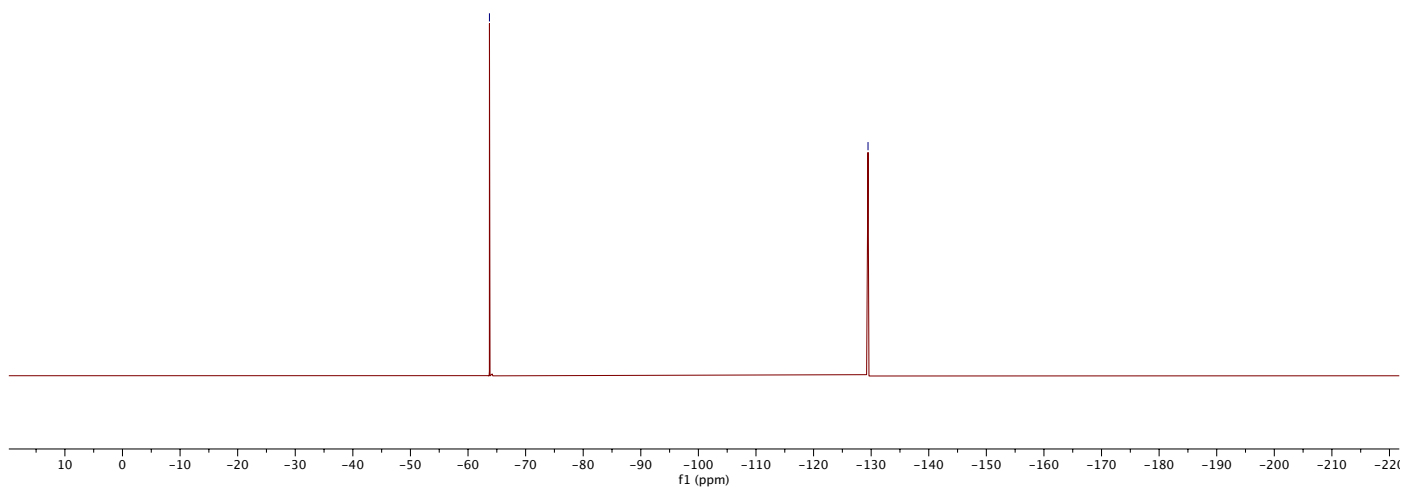

<sup>1</sup>H NMR, CDCl<sub>3</sub>, 400 MHz

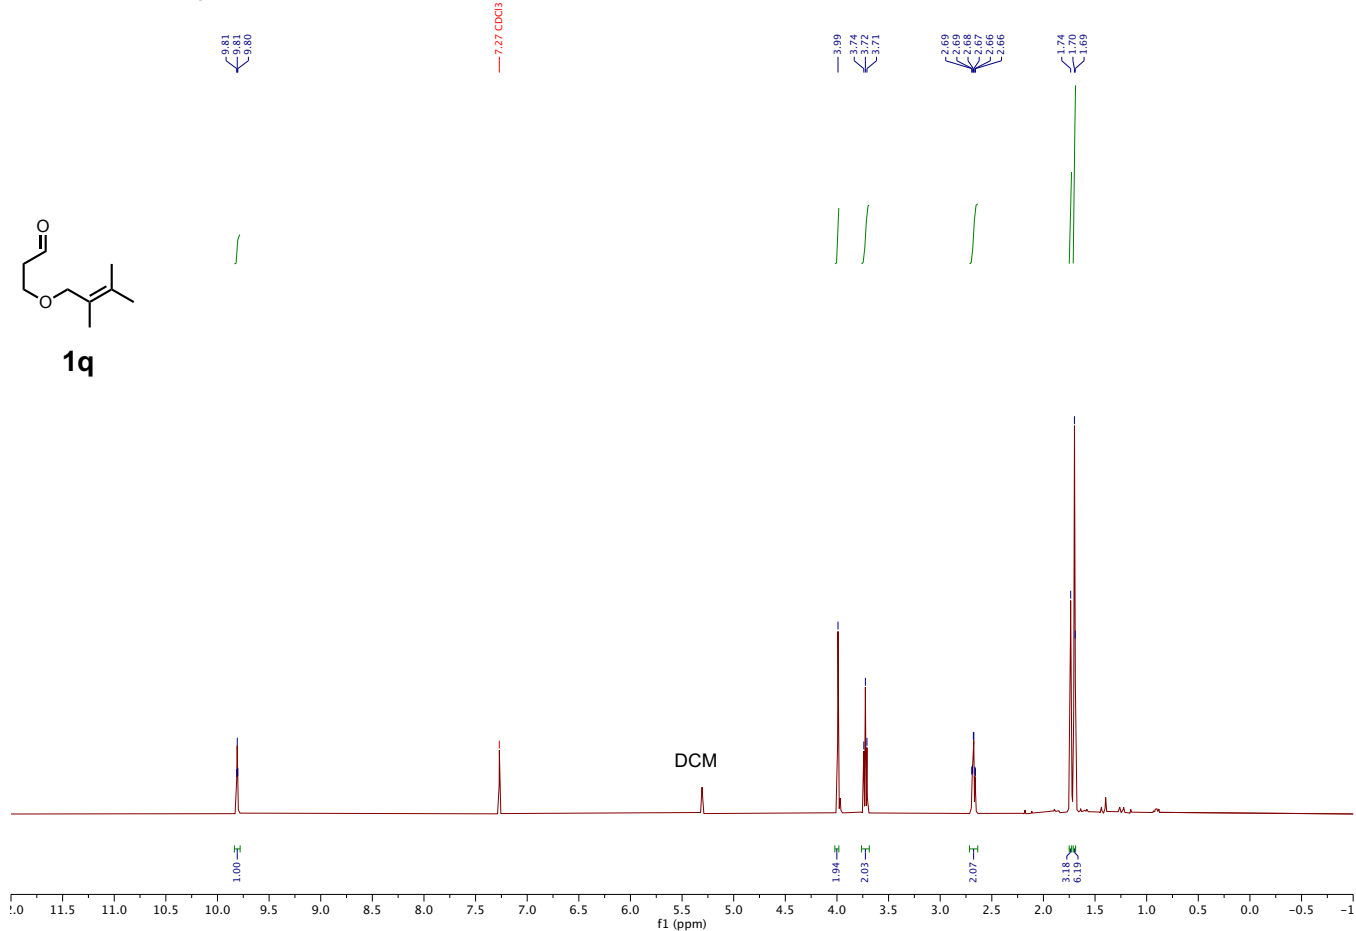

<sup>13</sup>C NMR, CDCl<sub>3</sub>, 101 MHz

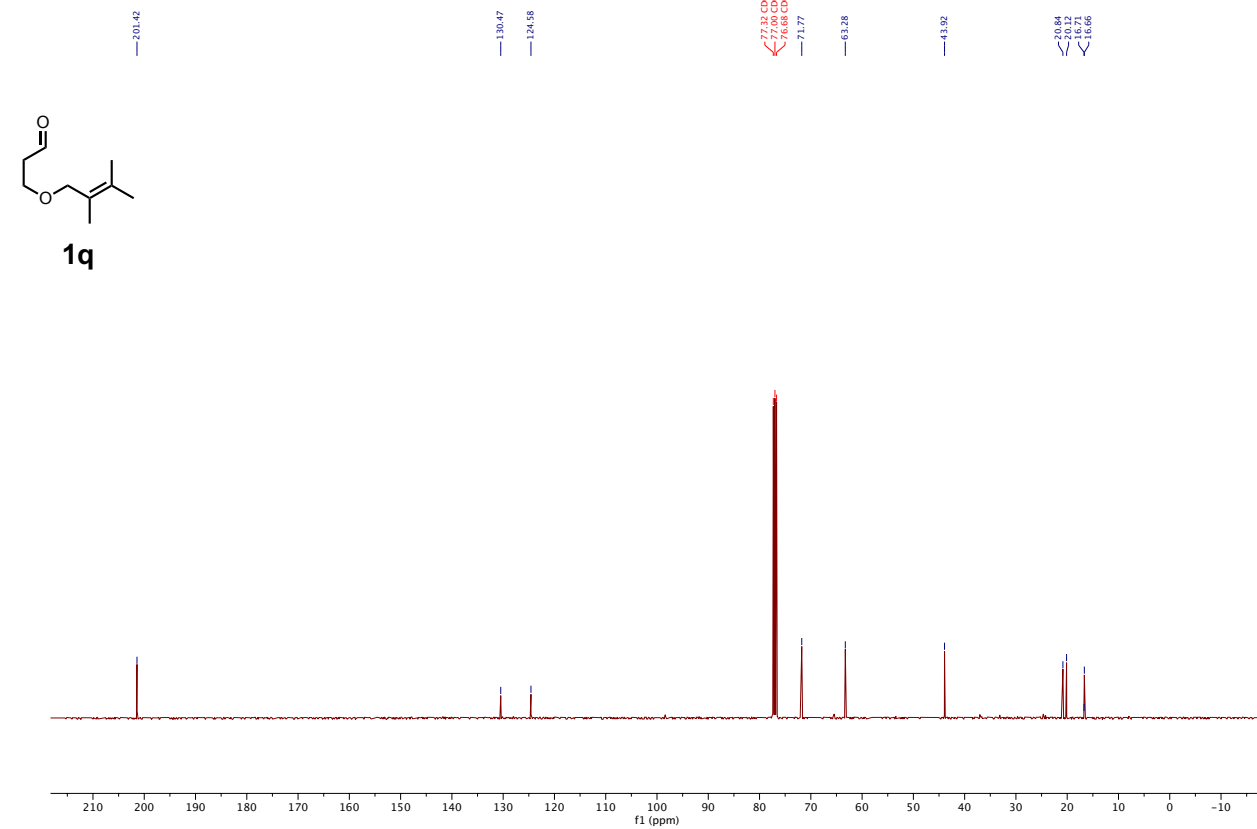



<sup>1</sup>H NMR, CDCl<sub>3</sub>, 400 MHz

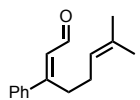

**1r**

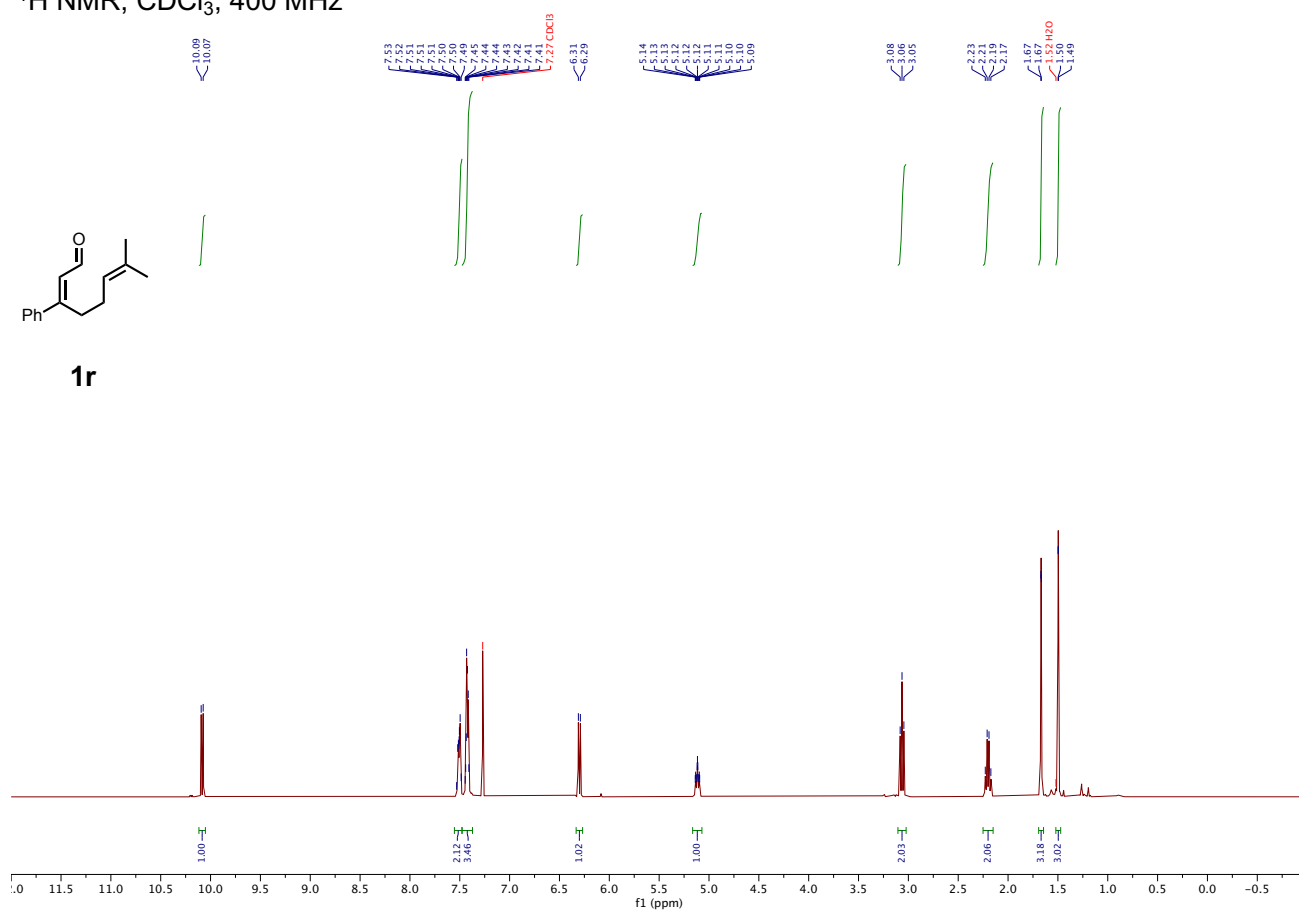

<sup>13</sup>C NMR, CDCl<sub>3</sub>, 101 MHz

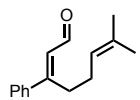

**1r**

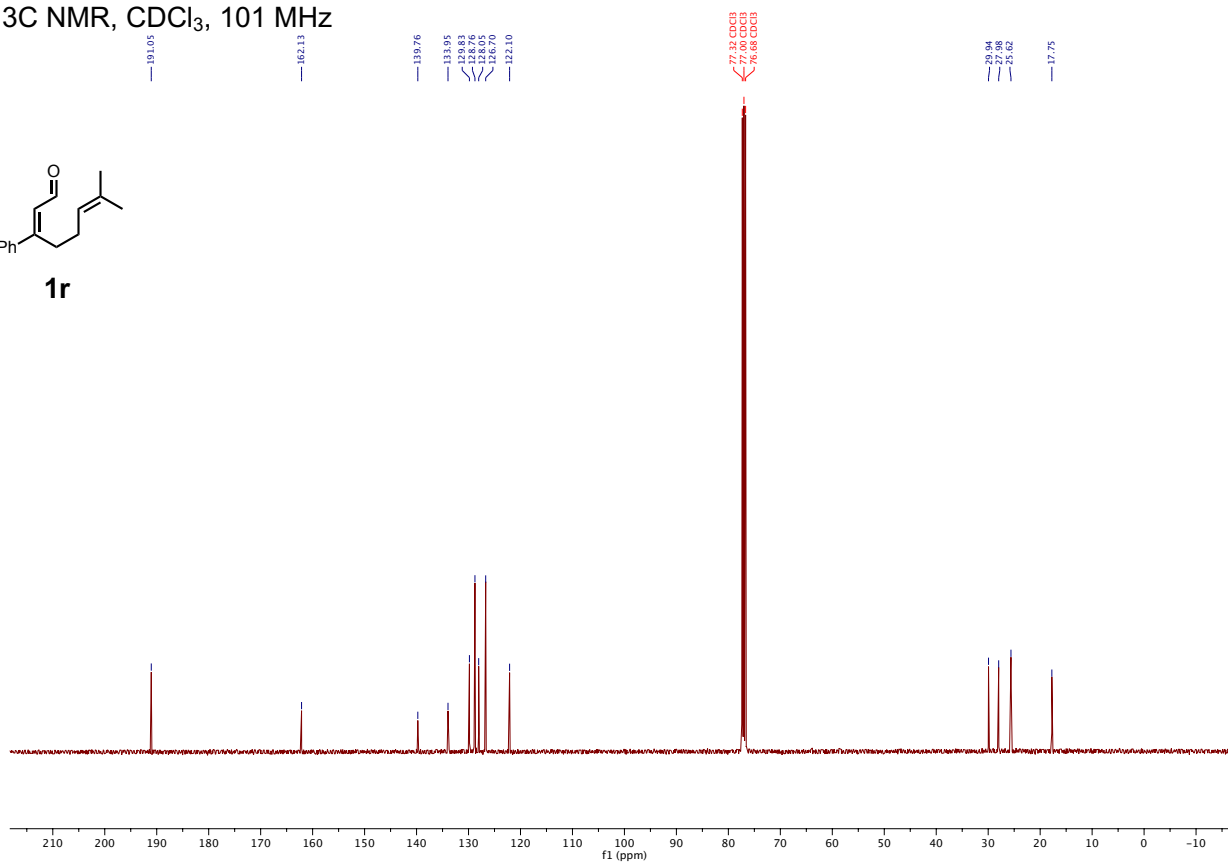

<sup>1</sup>H NMR, CDCl<sub>3</sub>, 400 MHz

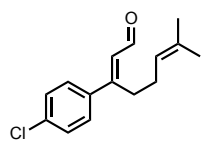

**1s**

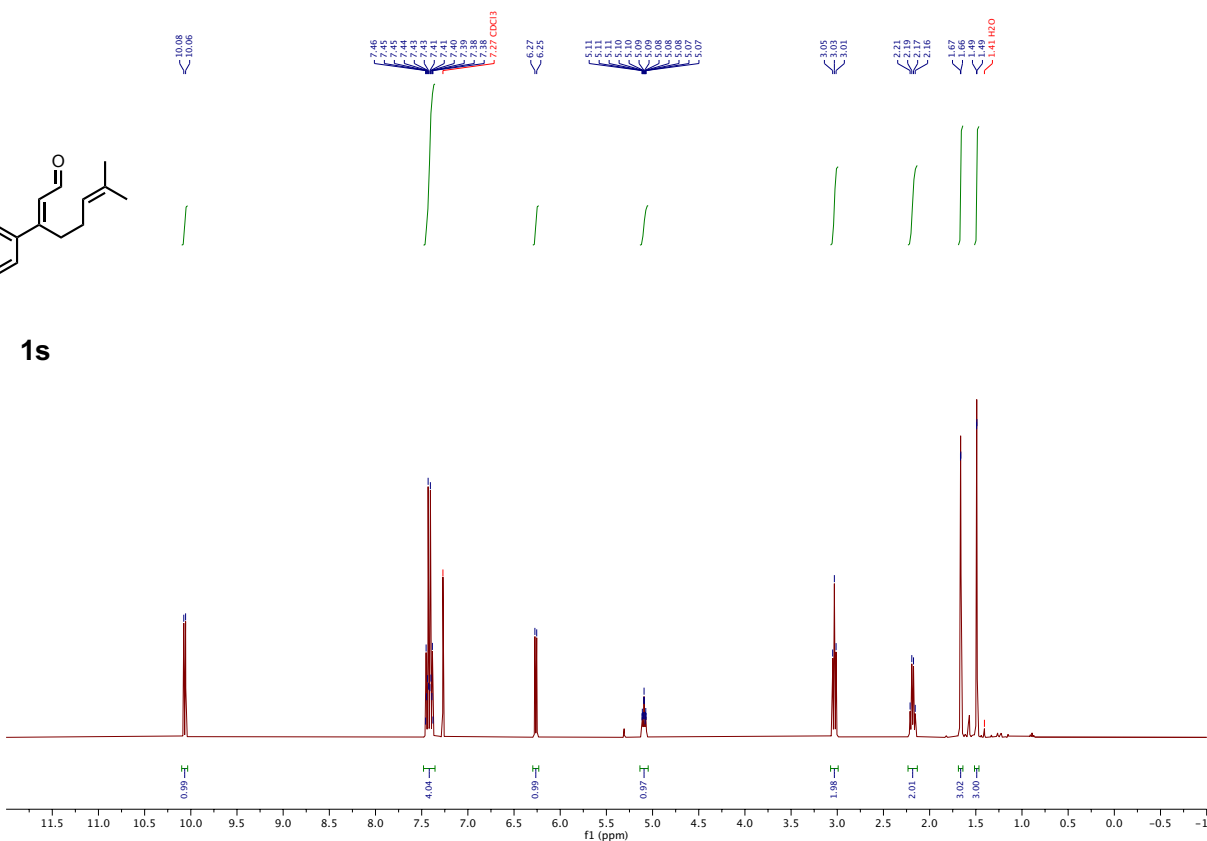

<sup>13</sup>C NMR, CDCl<sub>3</sub>, 101 MHz

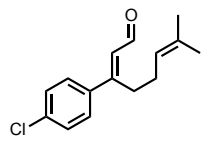

**1s**

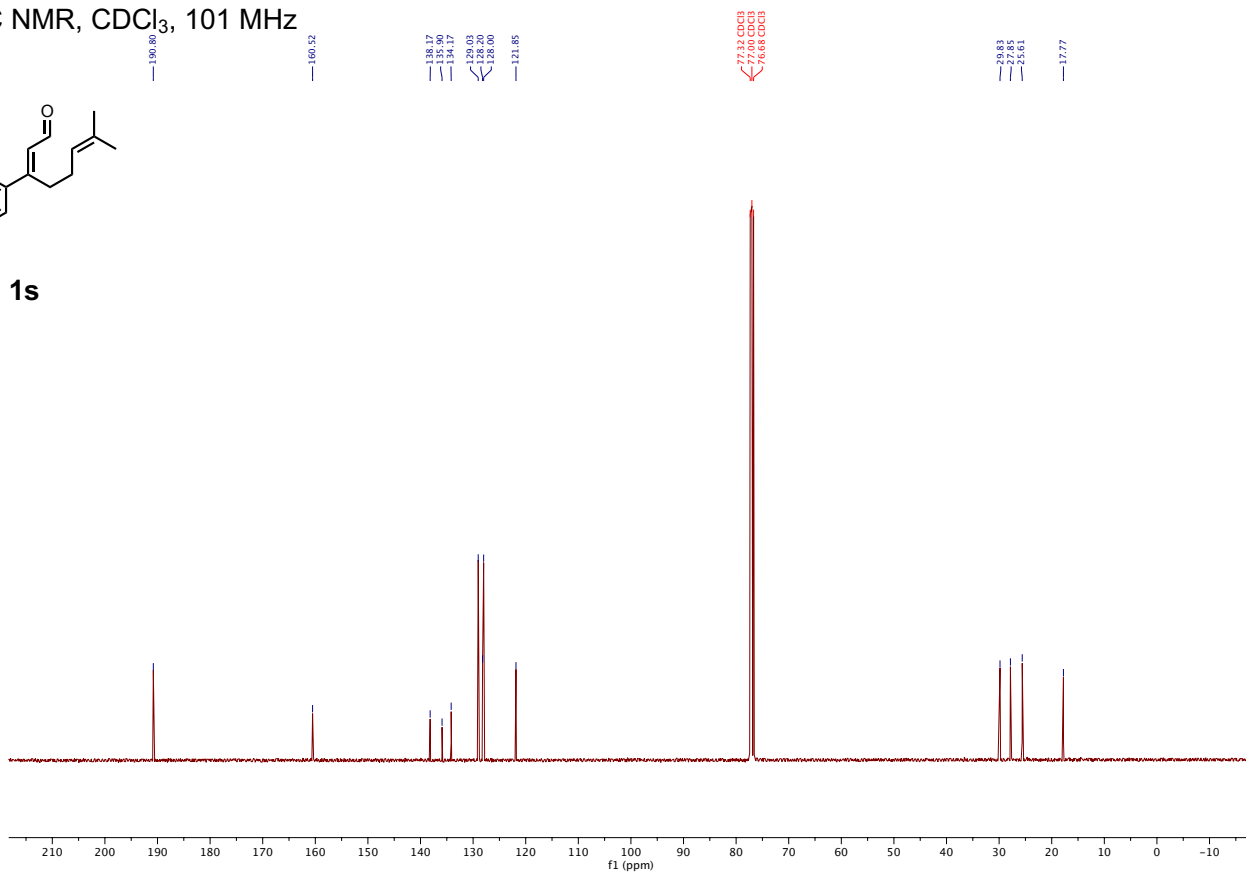

$^1\text{H}$  NMR,  $\text{CDCl}_3$ , 400 MHz

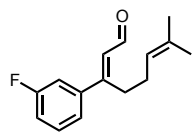

**1t**

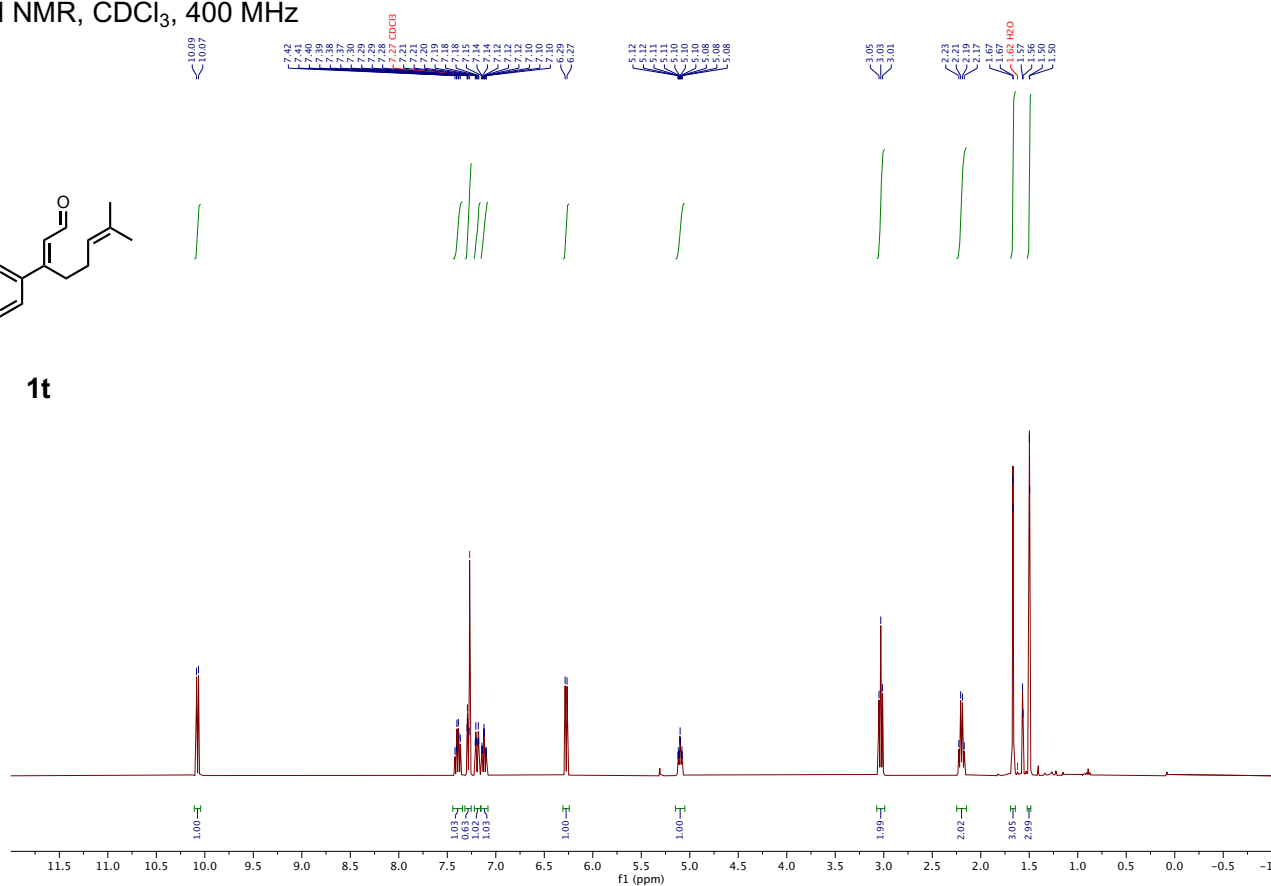

$^{13}\text{C}$  NMR,  $\text{CDCl}_3$ , 101 MHz

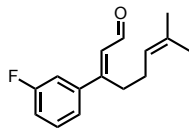

**1t**

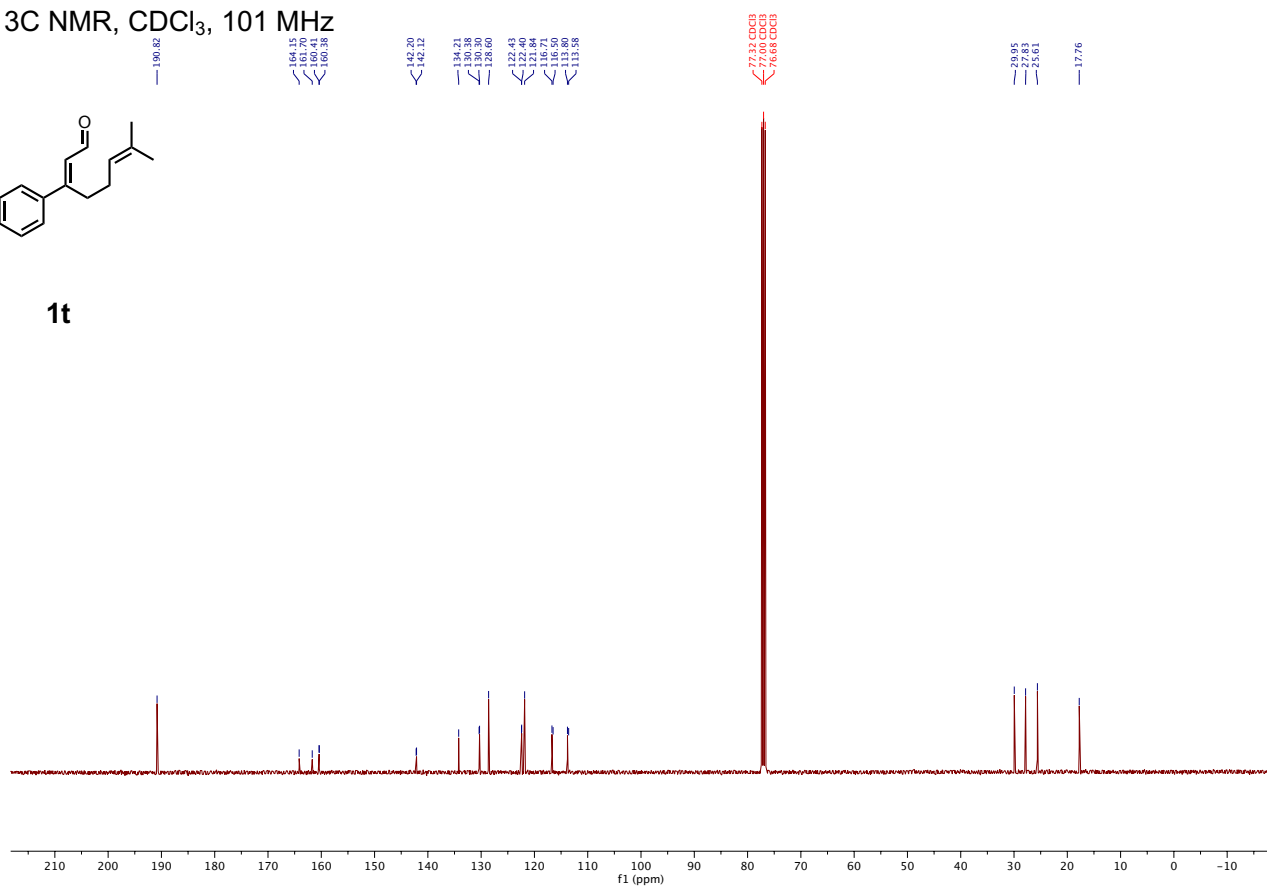

$^{19}\text{F}$  NMR,  $\text{CDCl}_3$ , 376 MHz



**1t**

$\text{PhCF}_3$  standard

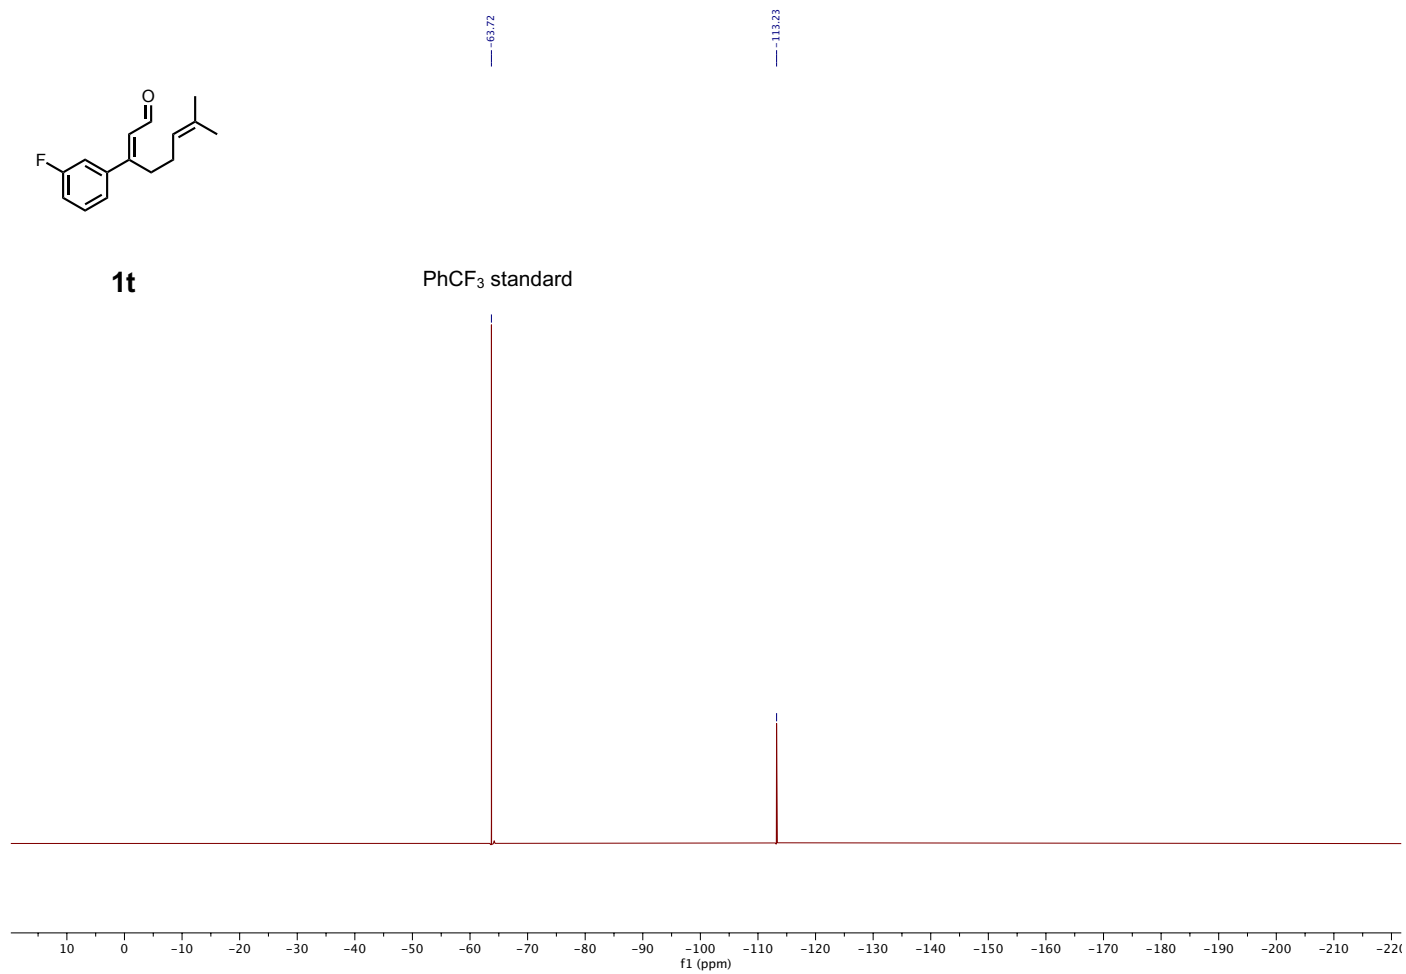

<sup>1</sup>H NMR, CDCl<sub>3</sub>, 400 MHz

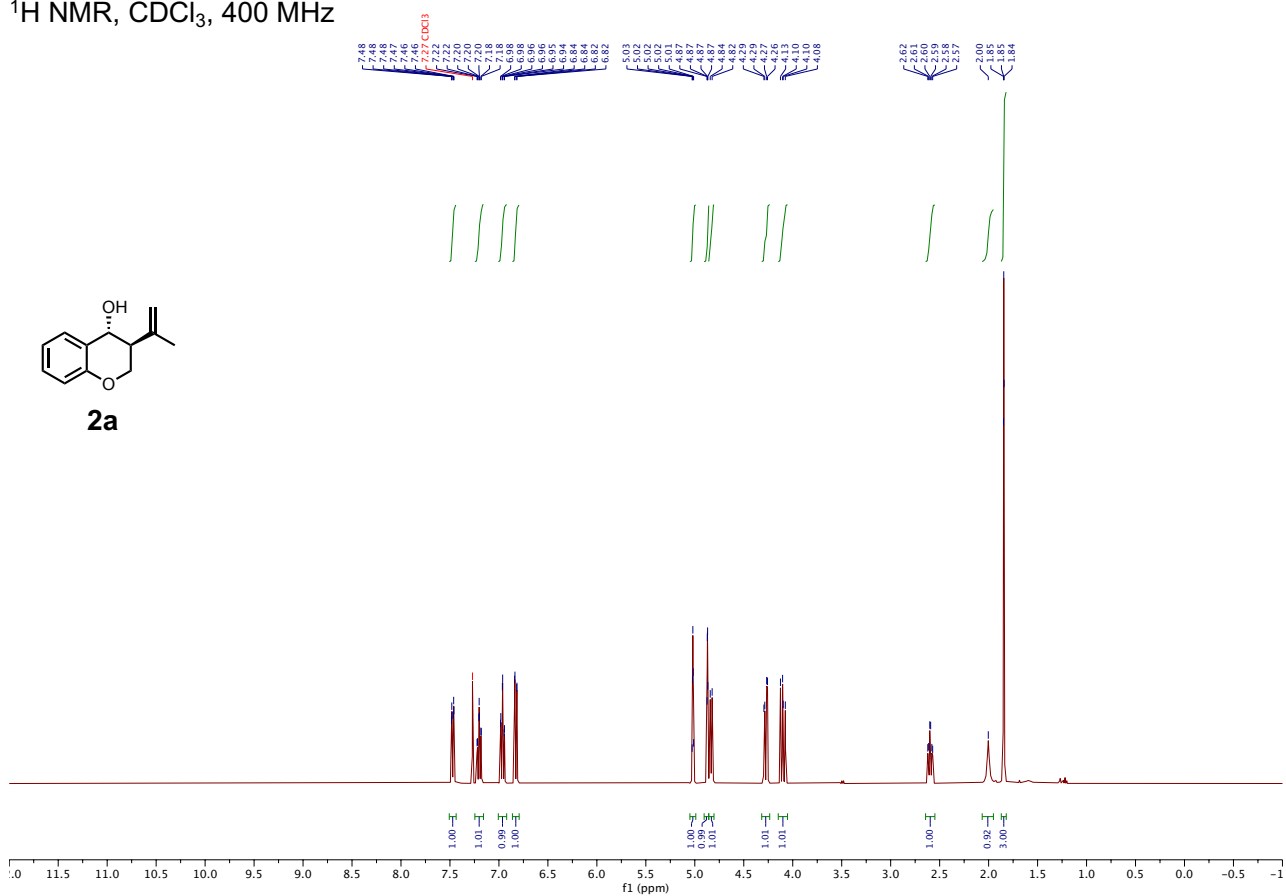

<sup>13</sup>C NMR, CDCl<sub>3</sub>, 101 MHz

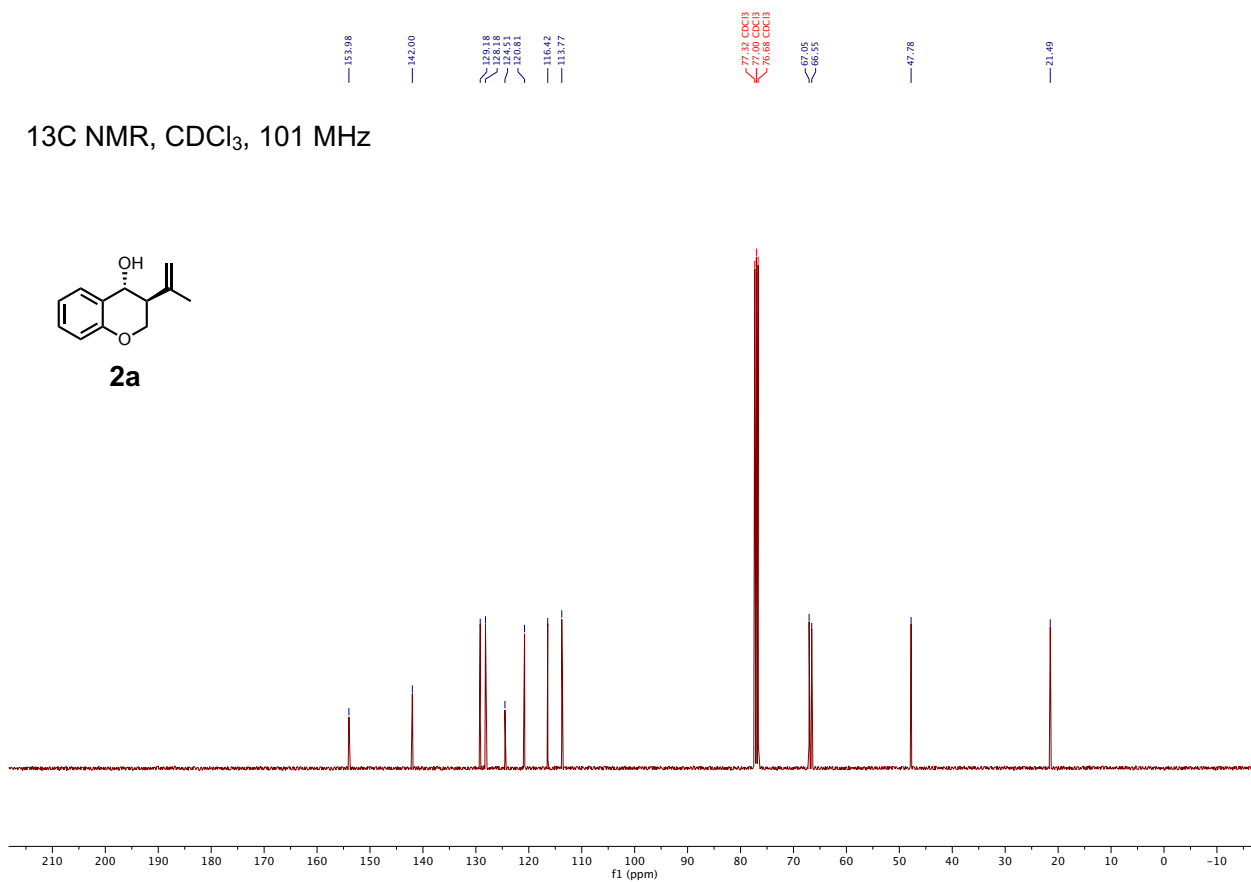

$^1\text{H}$  NMR,  $\text{CDCl}_3$ , 400 MHz

3:1 mixture with **2a**

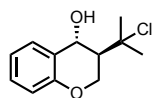

**3a**

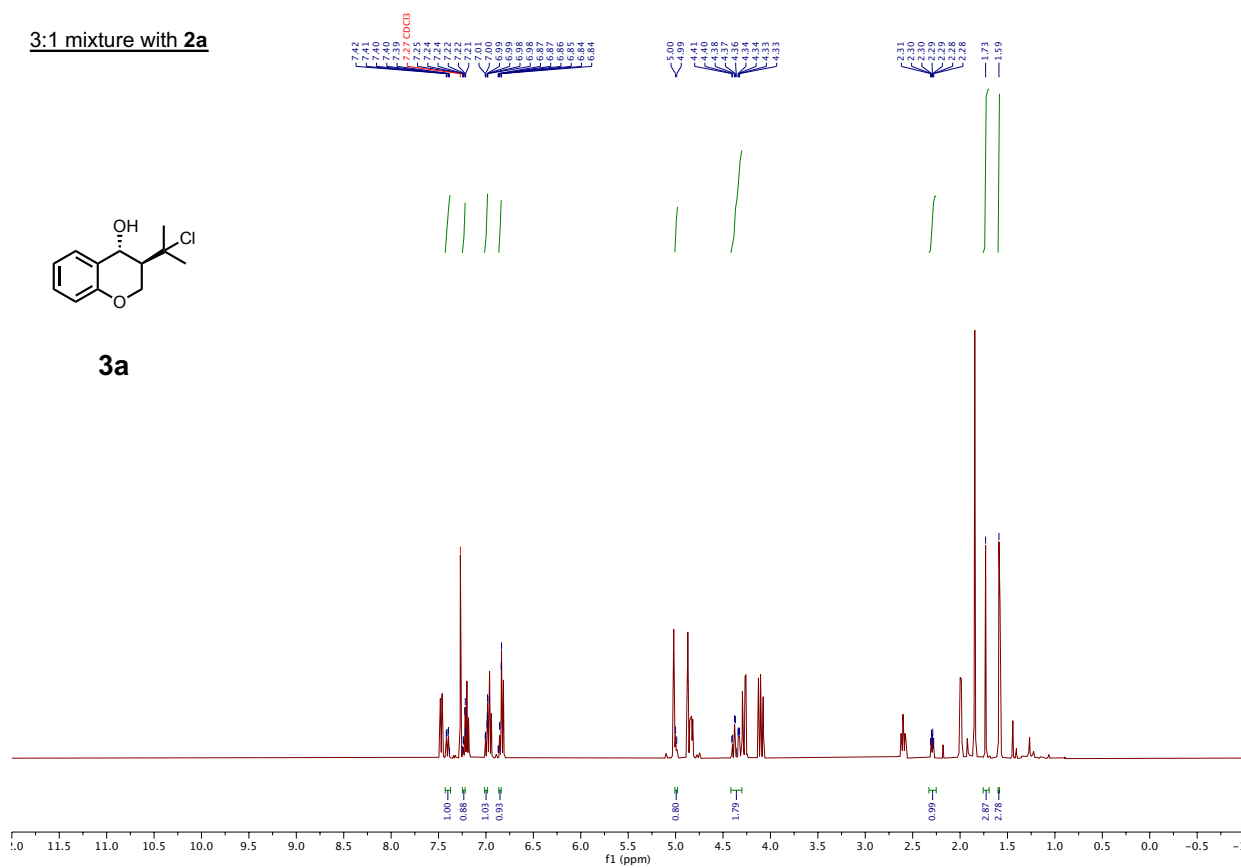

$^{13}\text{C}$  NMR,  $\text{CDCl}_3$ , 101 MHz

3:1 mixture with **2a**

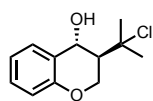

**3a**

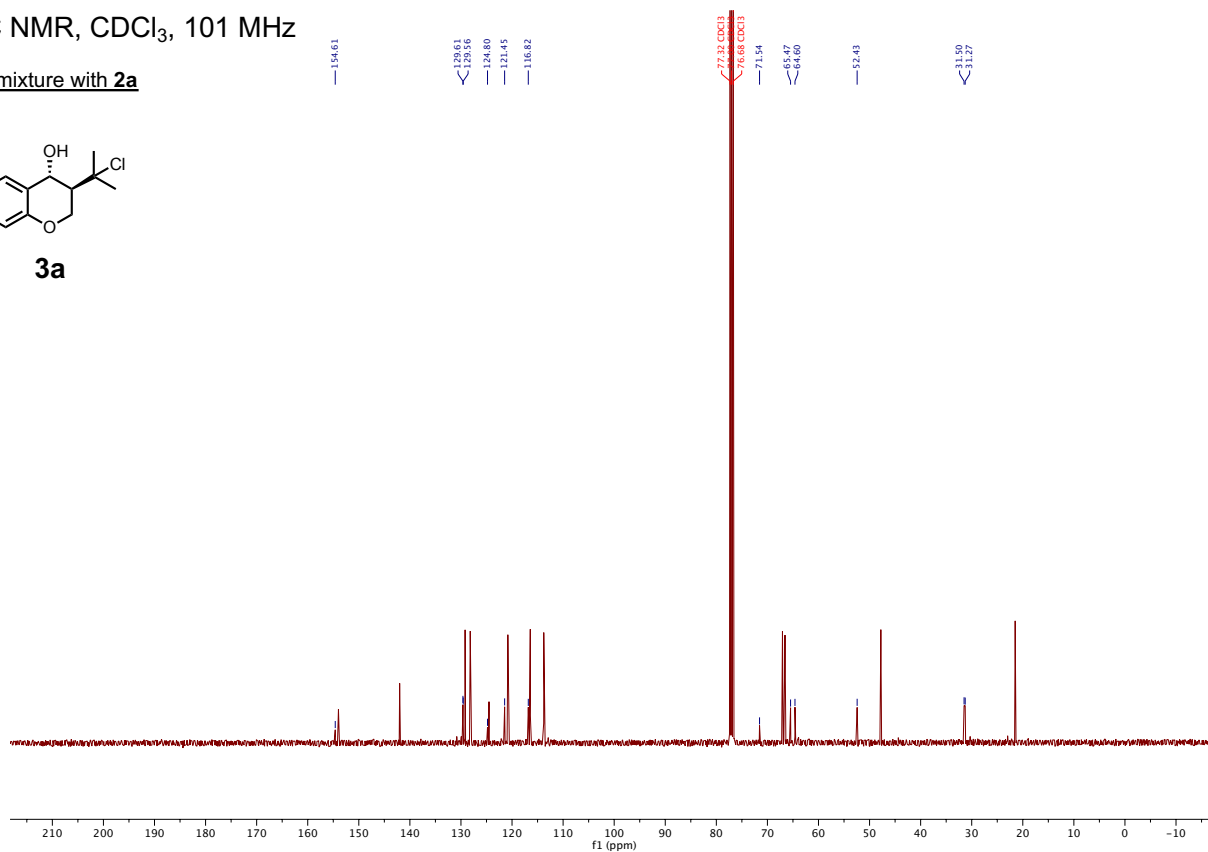

$^1\text{H}$  NMR,  $\text{CDCl}_3$ , 400 MHz

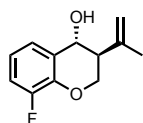

**2b**

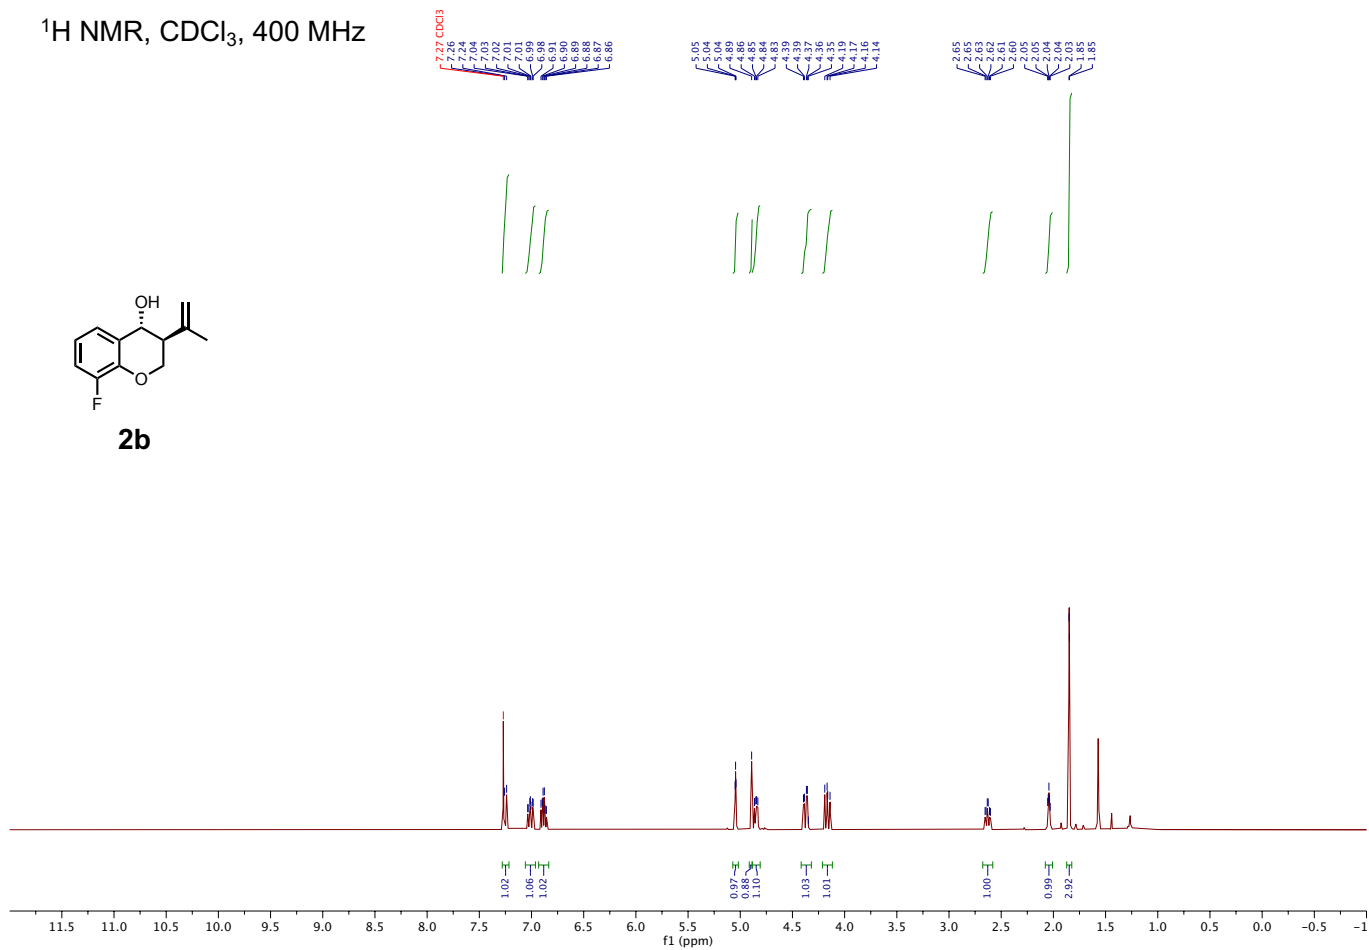

$^{13}\text{C}$  NMR,  $\text{CDCl}_3$ , 101 MHz

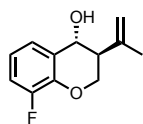

**2b**

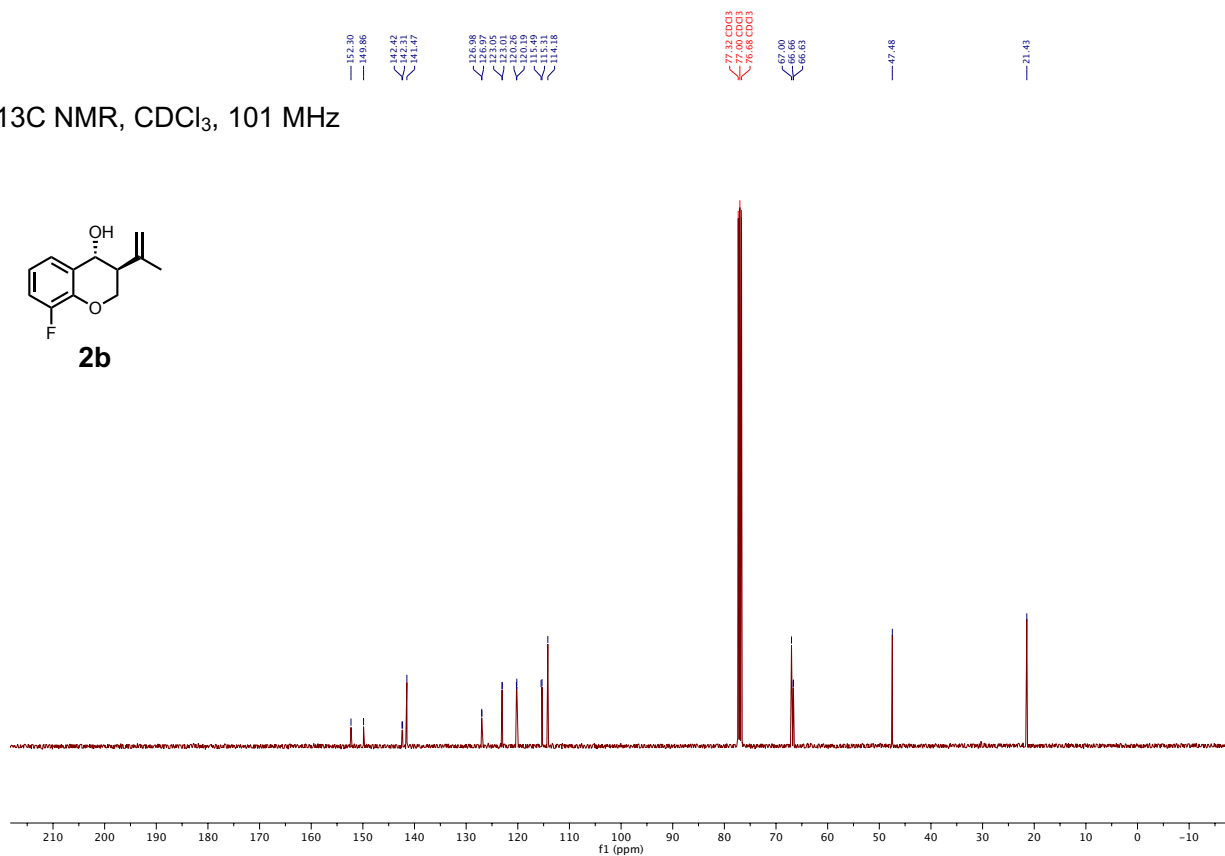

$^{19}\text{F}$  NMR,  $\text{CDCl}_3$ , 376 MHz

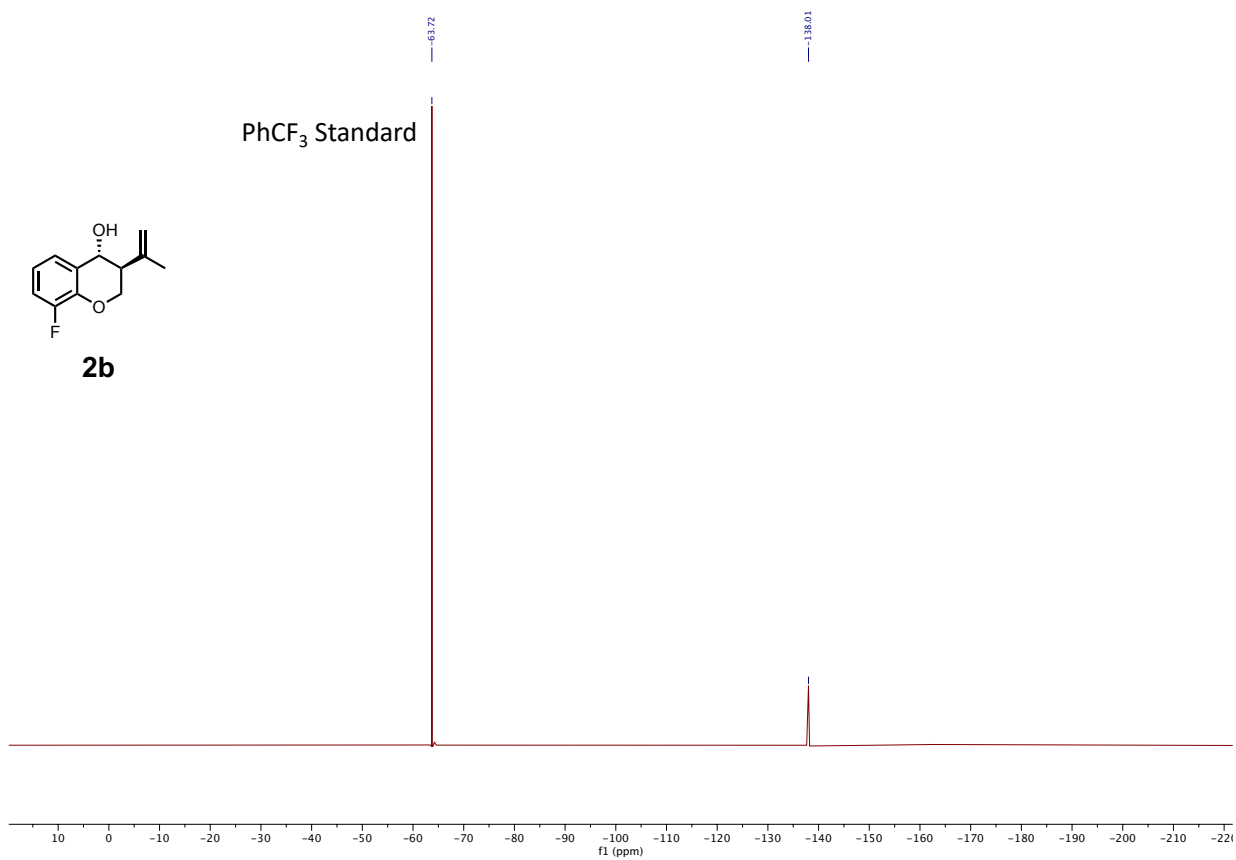



$^1\text{H}$  NMR,  $\text{CDCl}_3$ , 400 MHz

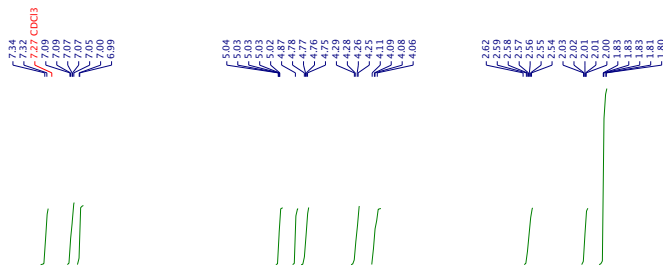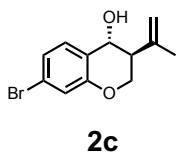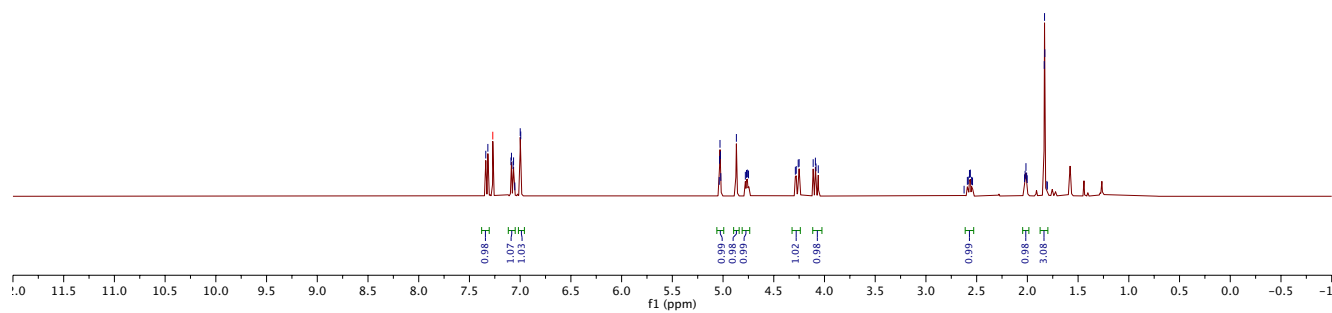

$^{13}\text{C}$  NMR,  $\text{CDCl}_3$ , 101 MHz

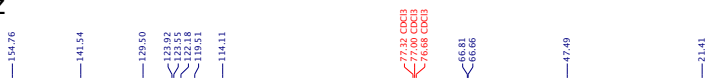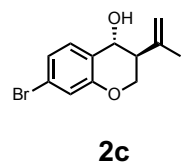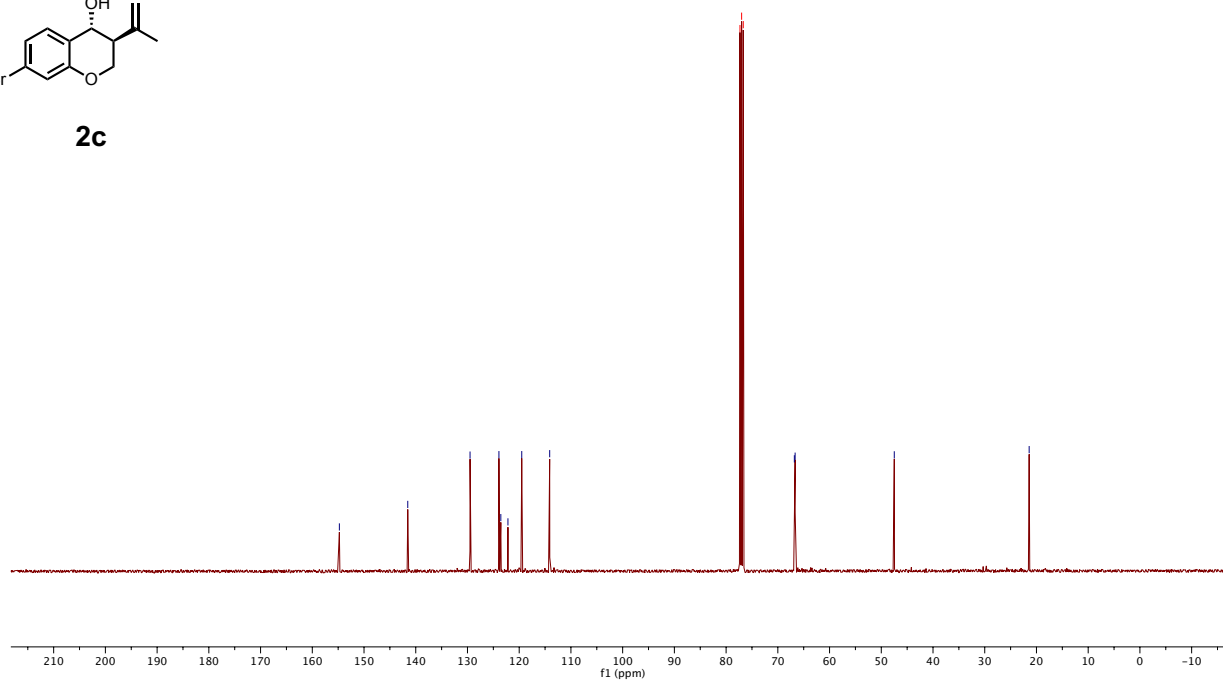

$^1\text{H}$  NMR,  $\text{CDCl}_3$ , 400 MHz

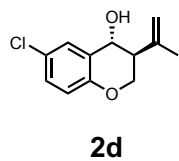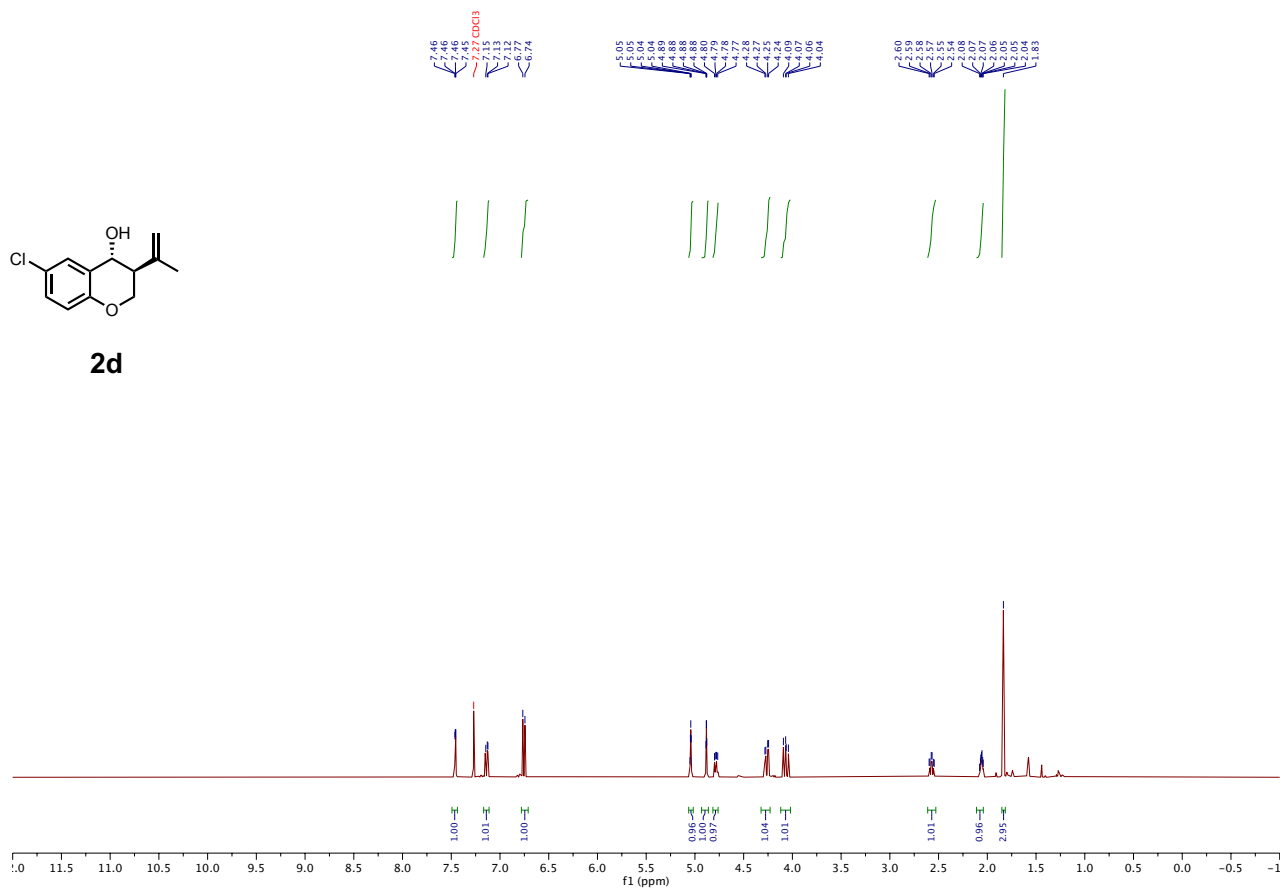

$^{13}\text{C}$  NMR,  $\text{CDCl}_3$ , 101 MHz

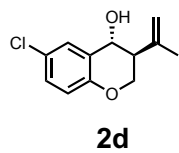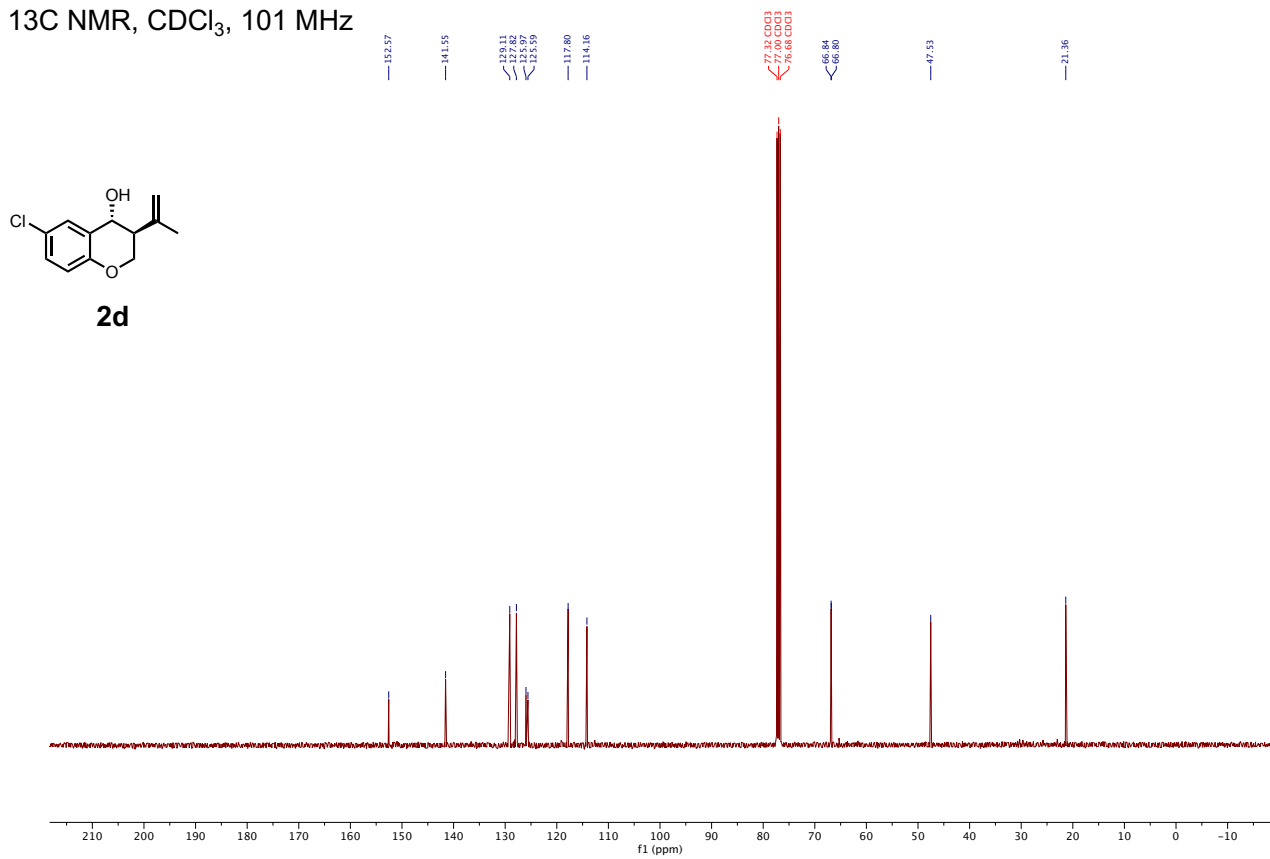

$^1\text{H}$  NMR,  $\text{CDCl}_3$ , 400 MHz

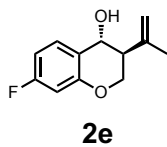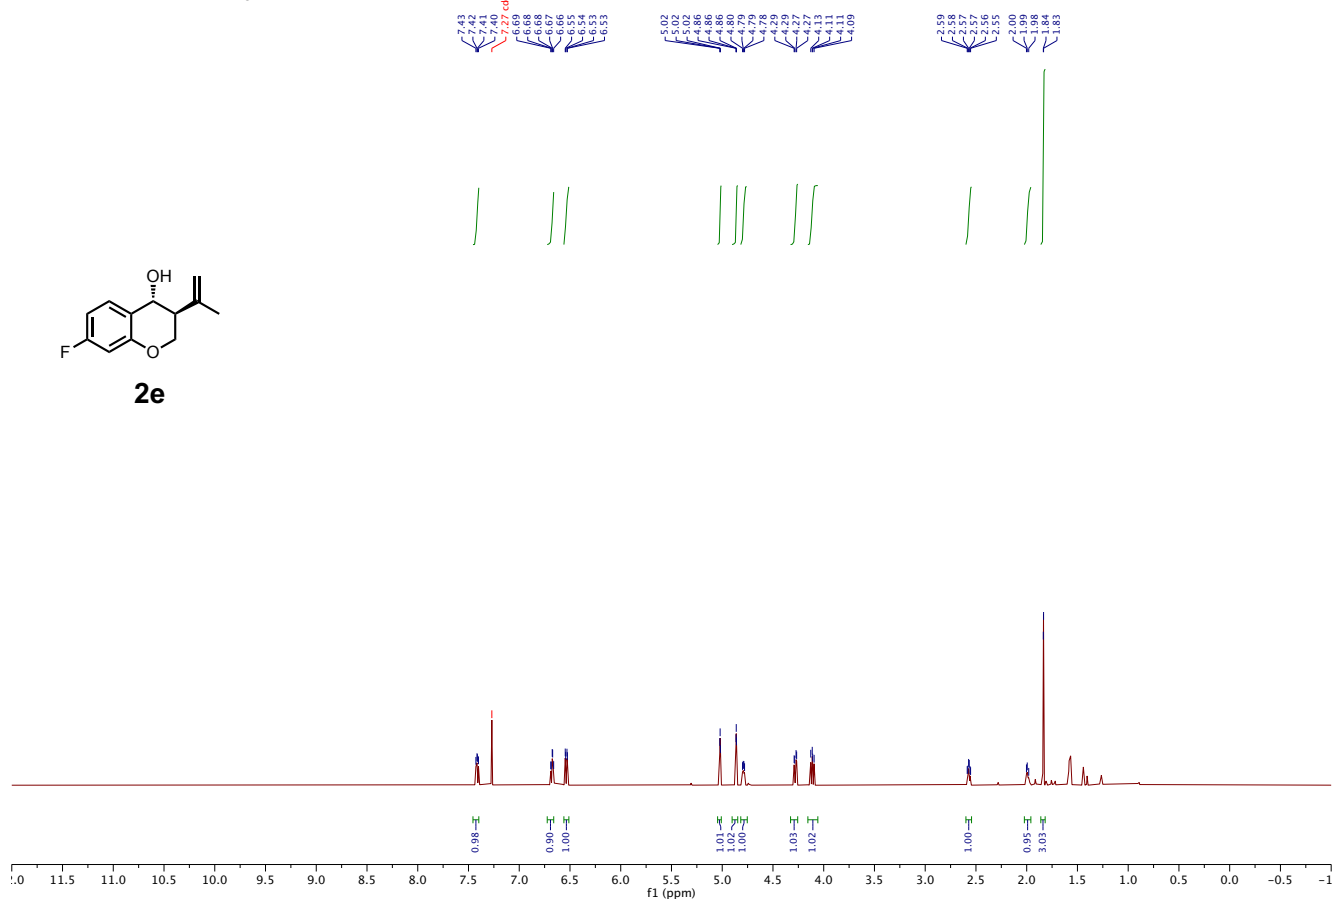

$^{13}\text{C}$  NMR,  $\text{CDCl}_3$ , 101 MHz

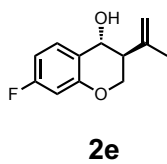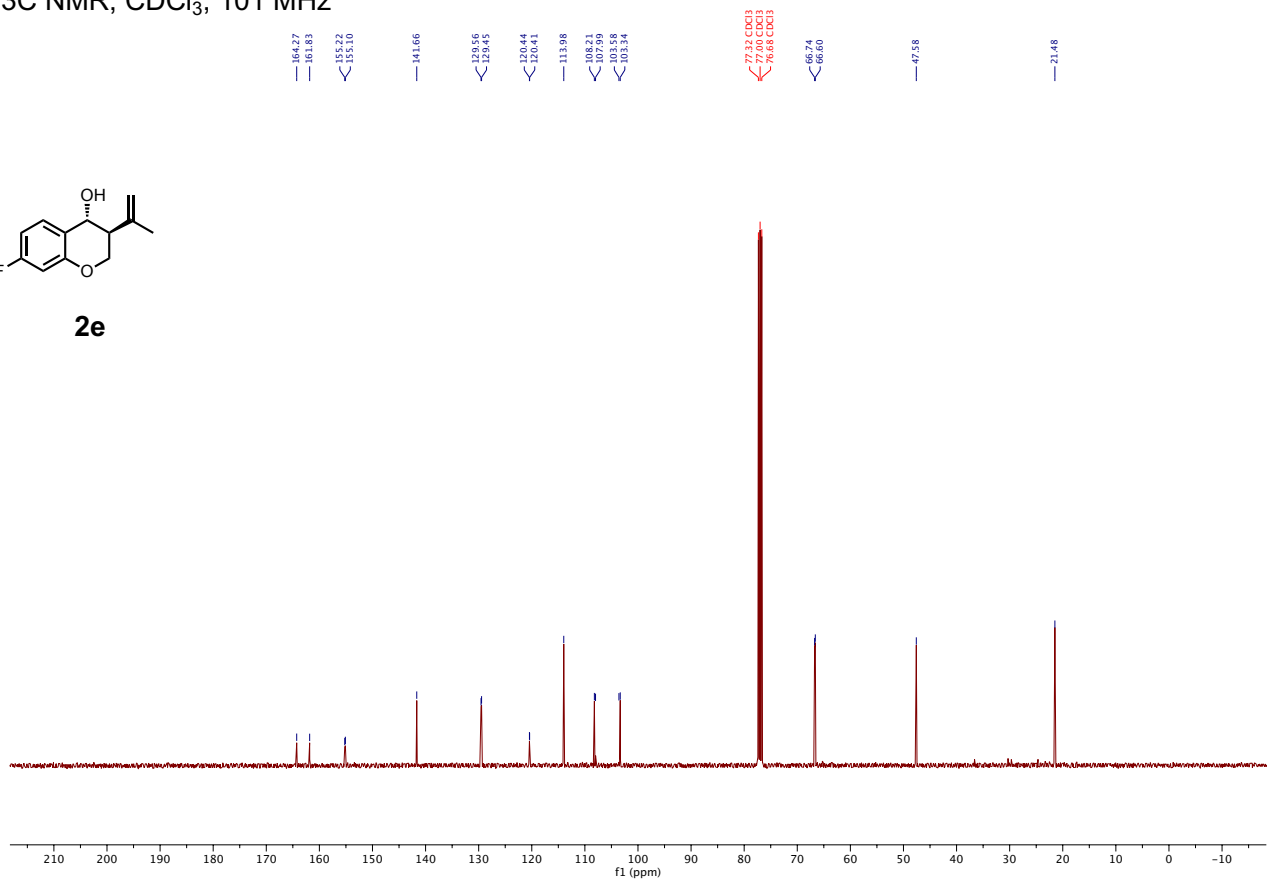

$^{19}\text{F}$  NMR,  $\text{CDCl}_3$ , 376 MHz

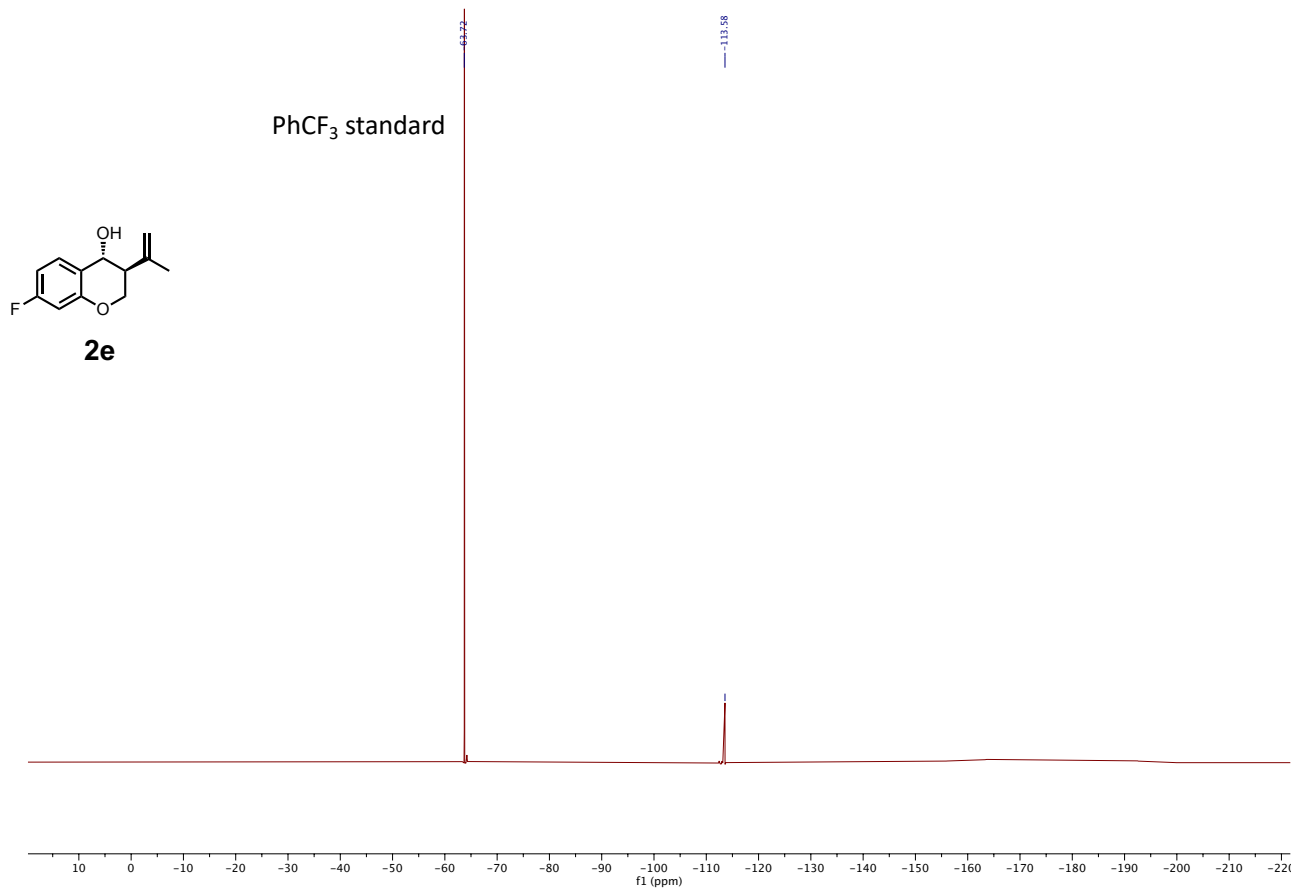

$^1\text{H}$  NMR,  $\text{CDCl}_3$ , 500 MHz

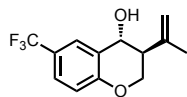

**2f**

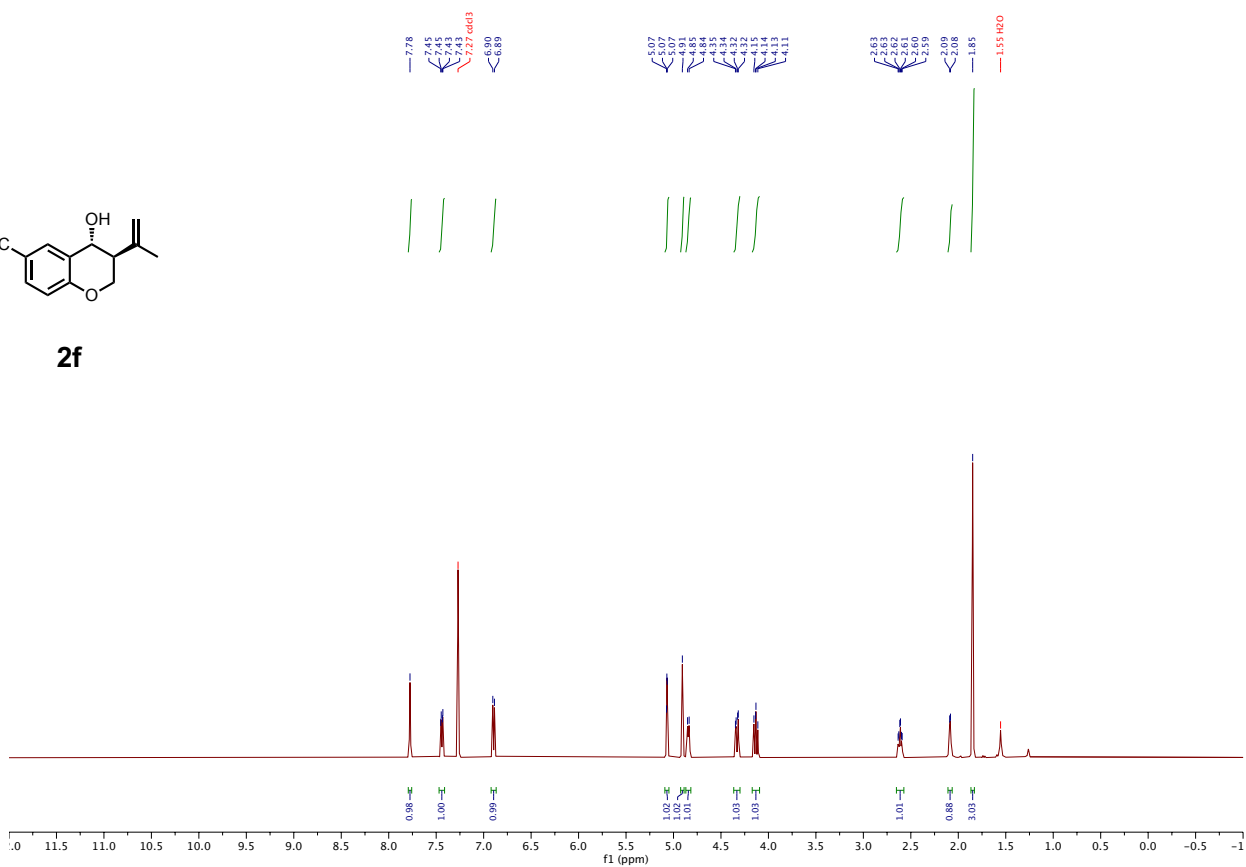

$^{13}\text{C}$  NMR,  $\text{CDCl}_3$ , 101 MHz

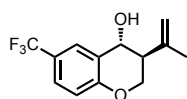

**2f**

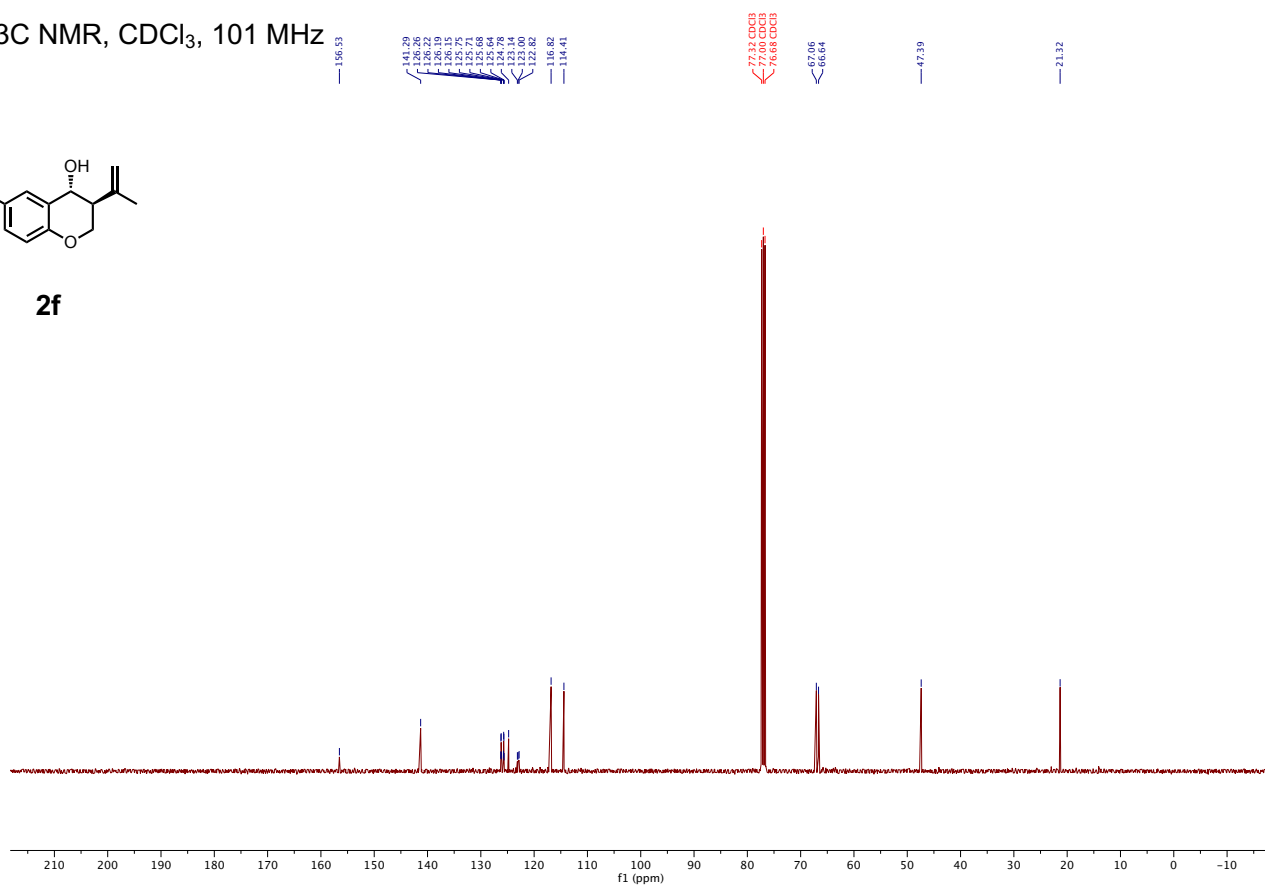

$^{19}\text{F}$  NMR,  $\text{CDCl}_3$ , 470 MHz

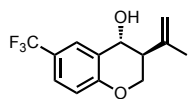

**2f**

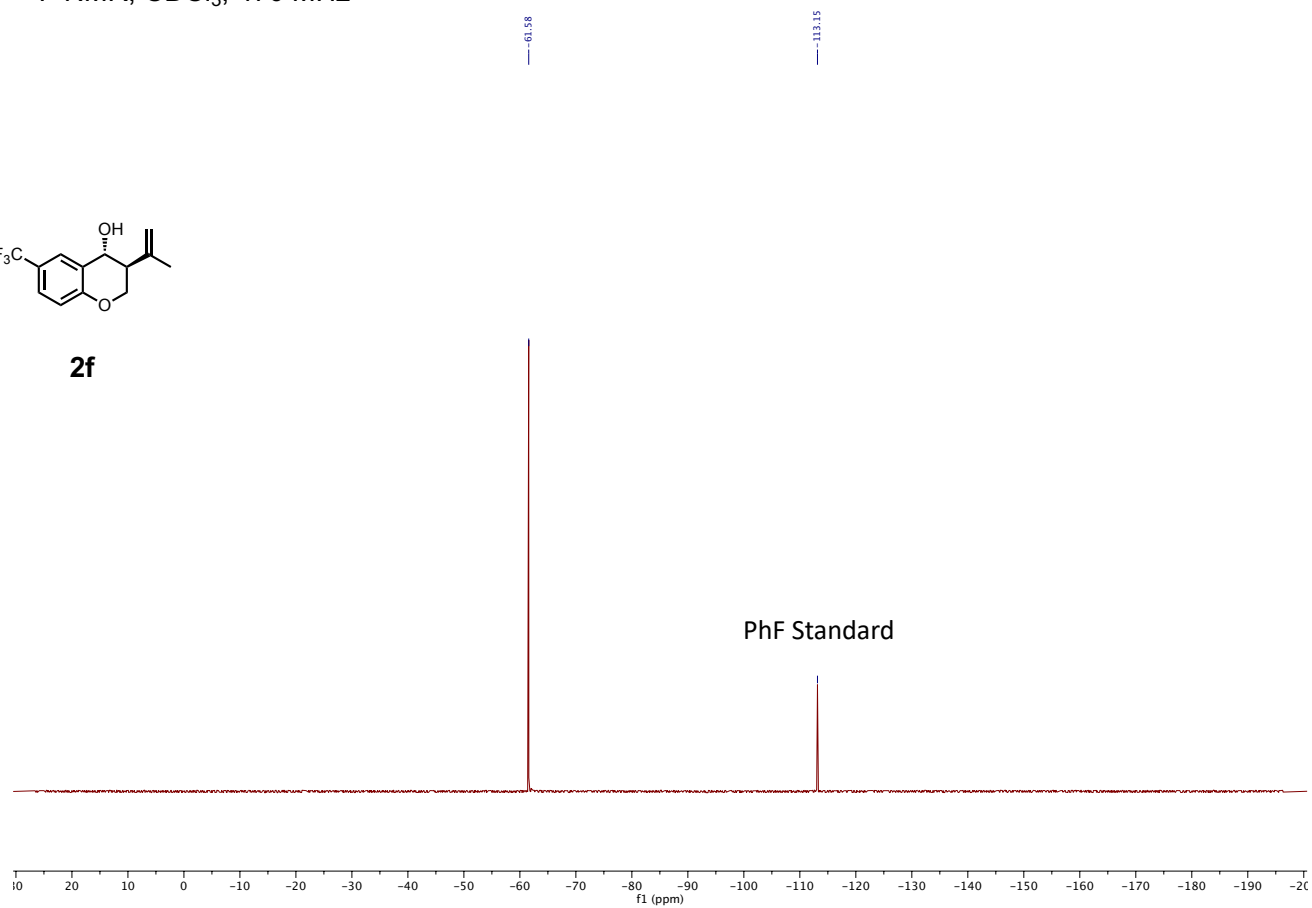

<sup>1</sup>H NMR, CDCl<sub>3</sub>, 400 MHz

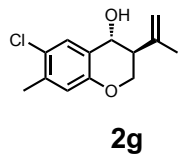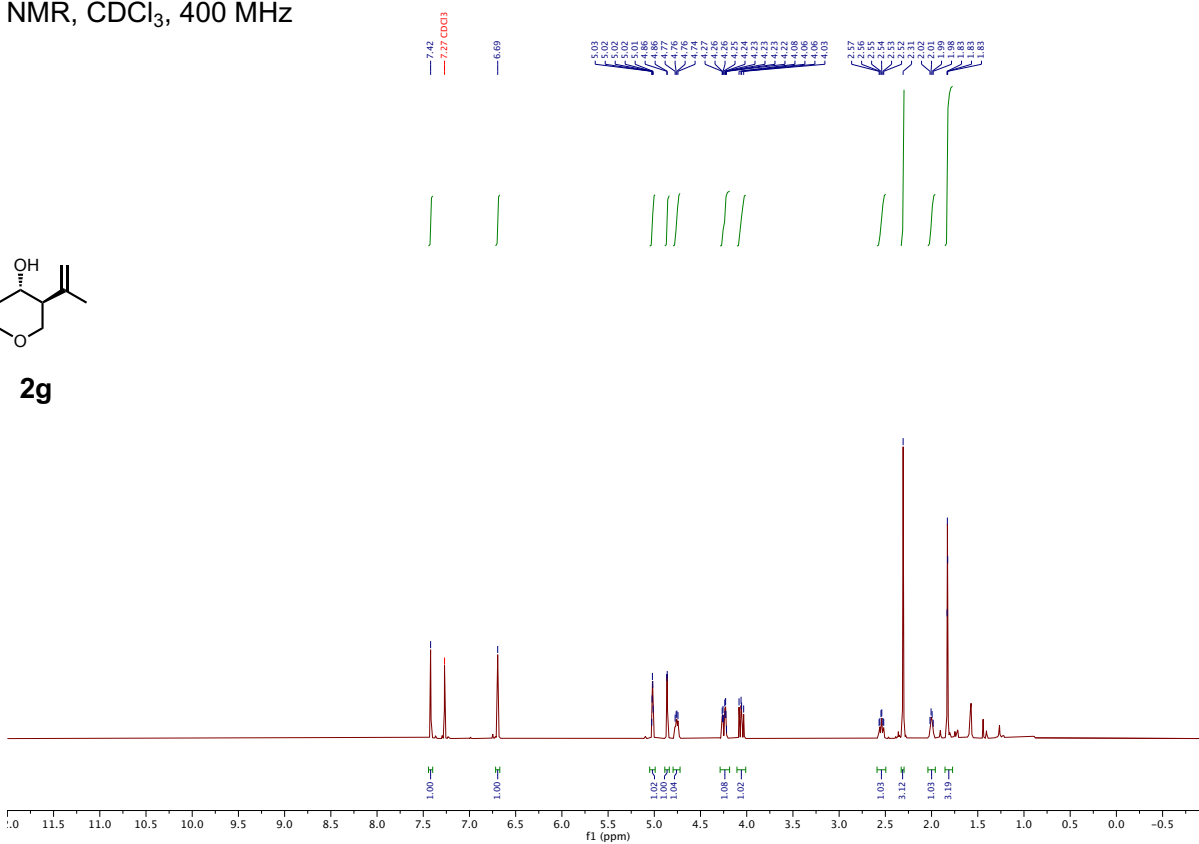

<sup>13</sup>C NMR, CDCl<sub>3</sub>, 101 MHz

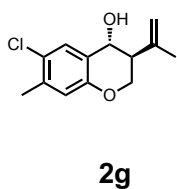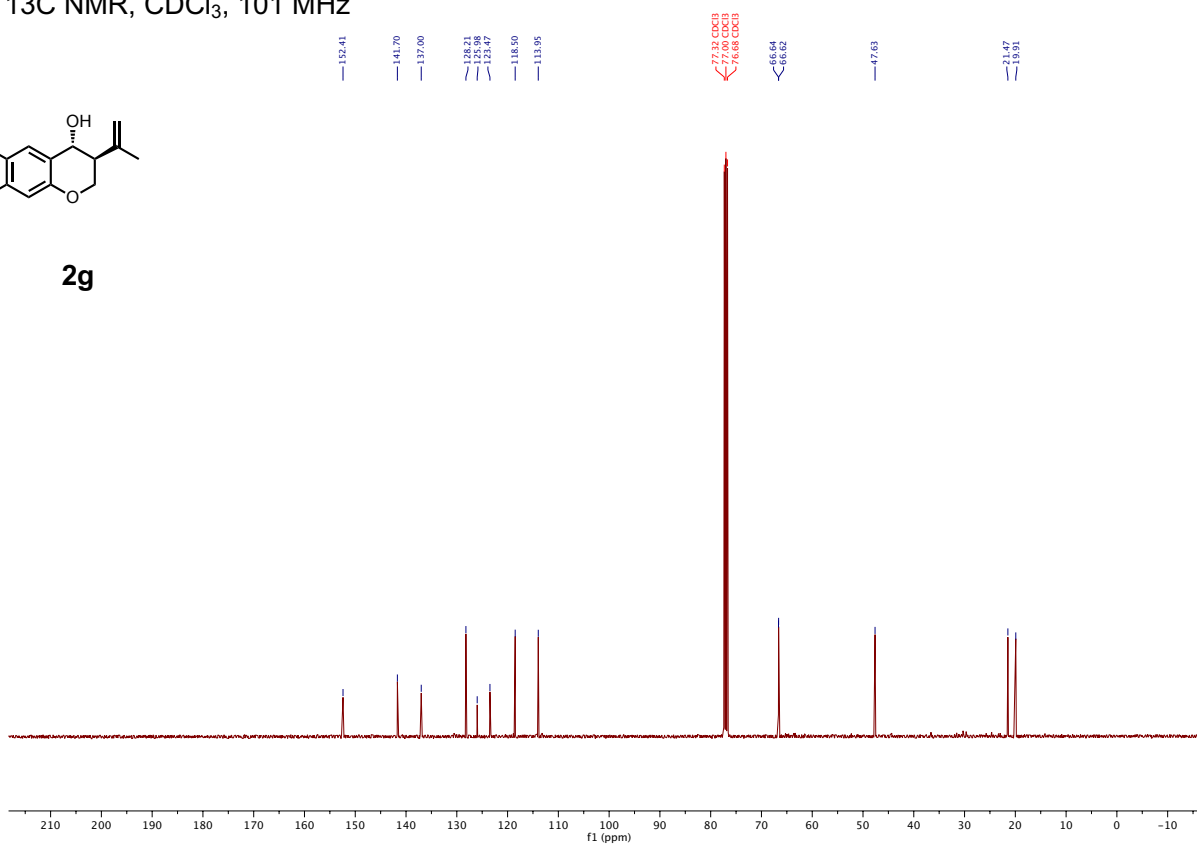

<sup>1</sup>H NMR, CDCl<sub>3</sub>, 400 MHz

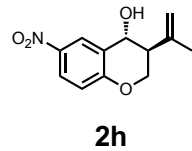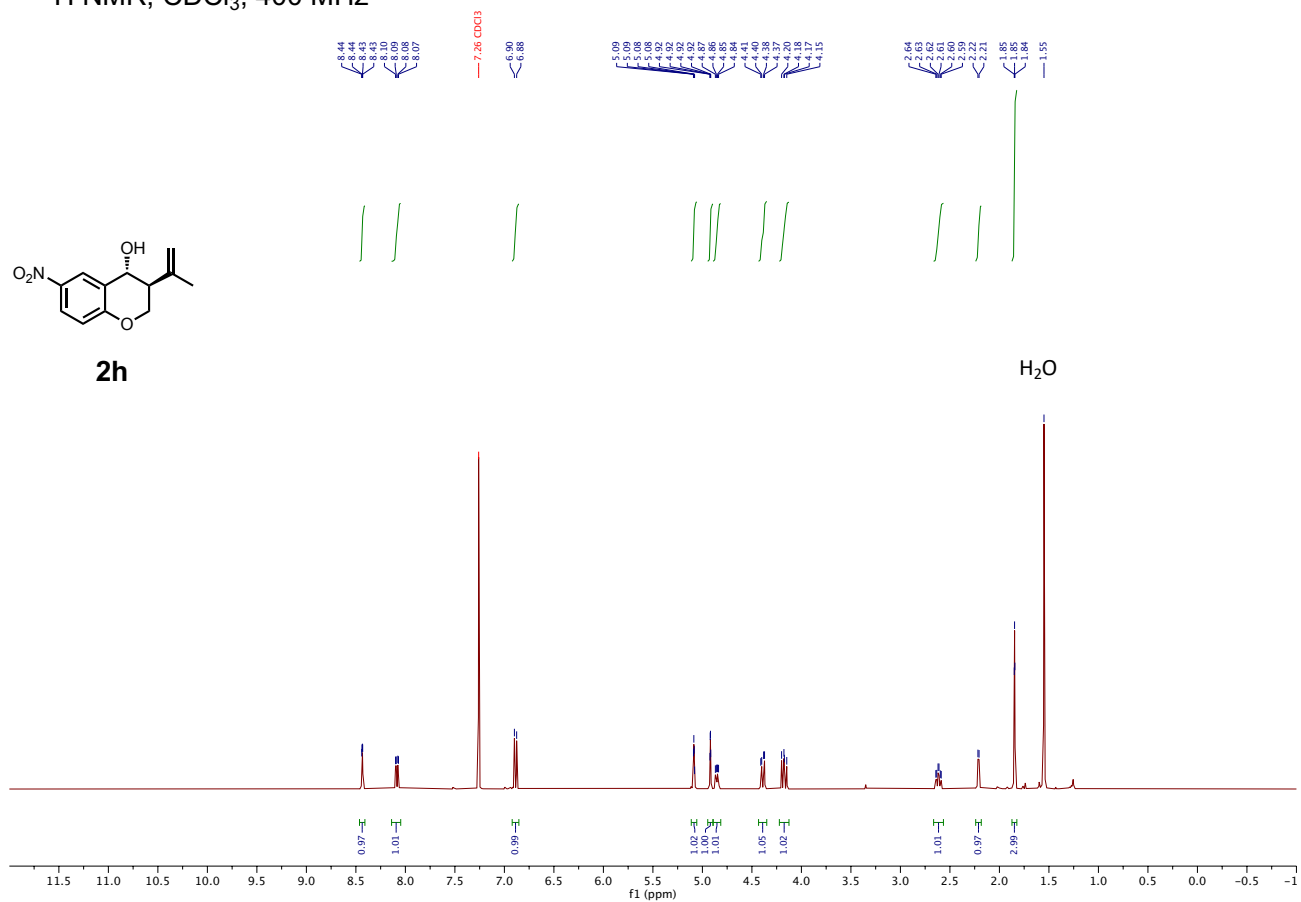

<sup>13</sup>C NMR, CDCl<sub>3</sub>, 101 MHz

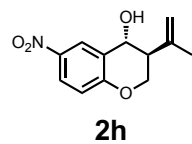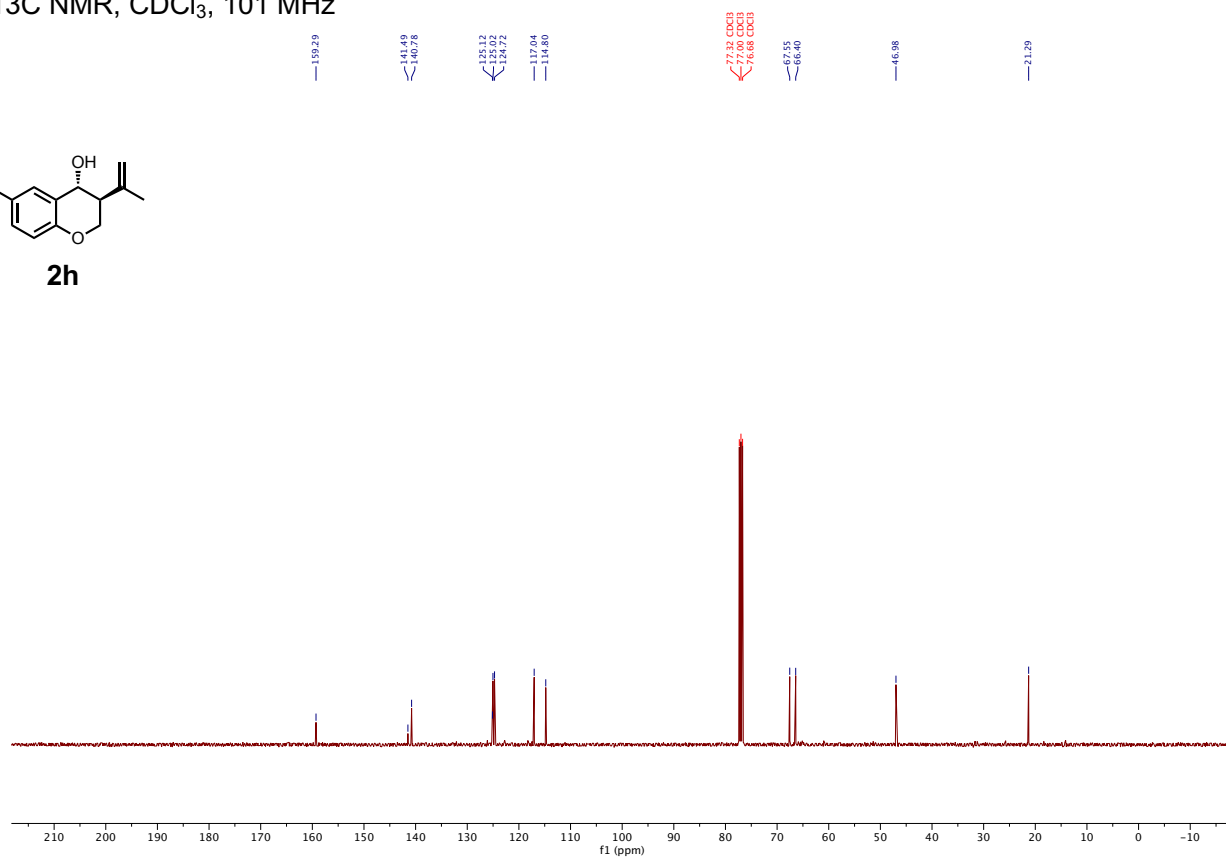





$^1\text{H}$  NMR,  $\text{CDCl}_3$ , 400 MHz

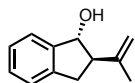

**2j**

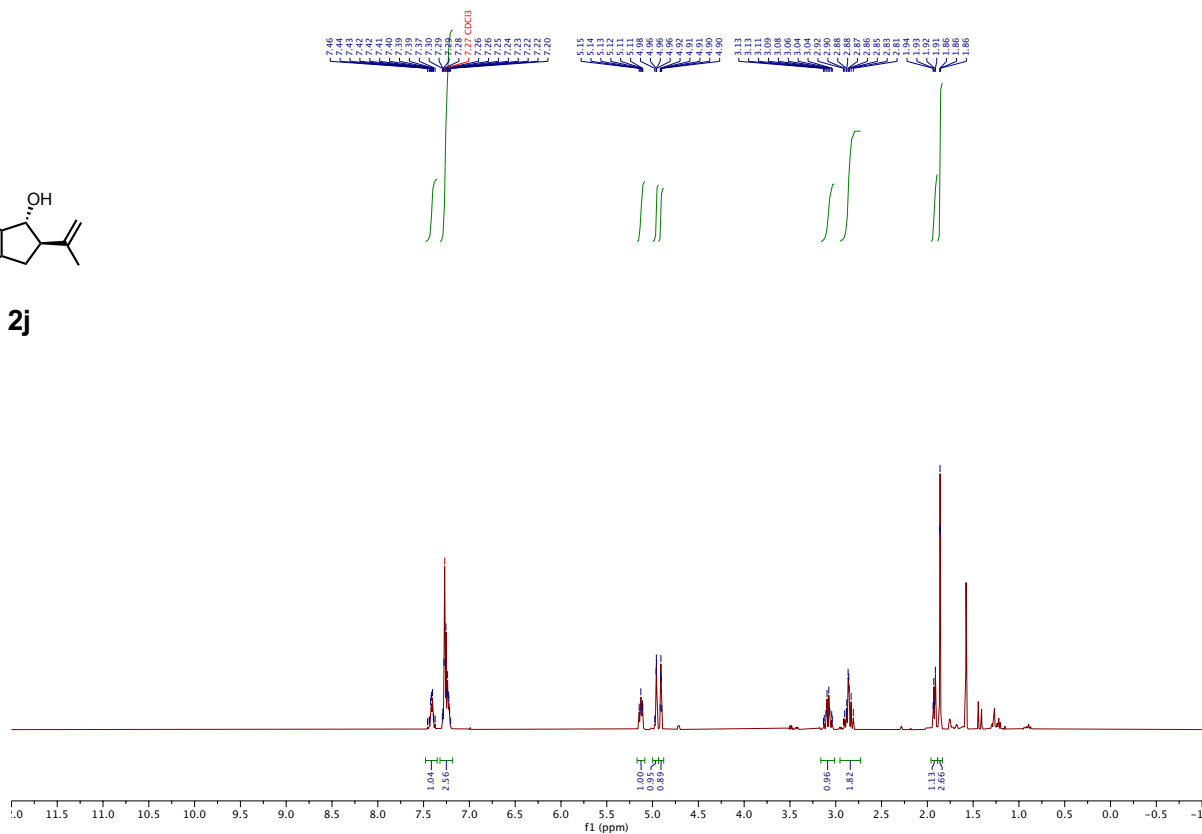

$^{13}\text{C}$  NMR,  $\text{CDCl}_3$ , 101 MHz

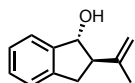

**2j**

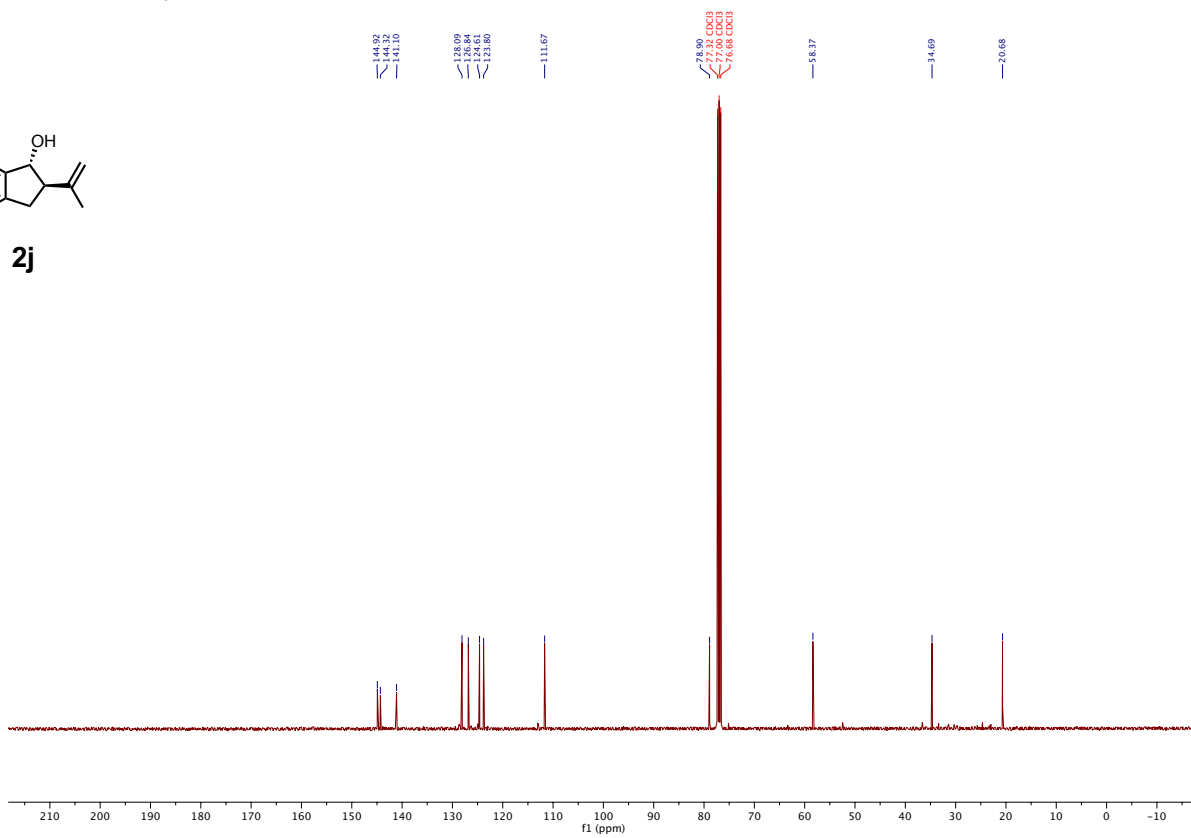

<sup>1</sup>H NMR, CDCl<sub>3</sub>, 600 MHz

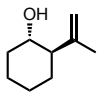

**2k**

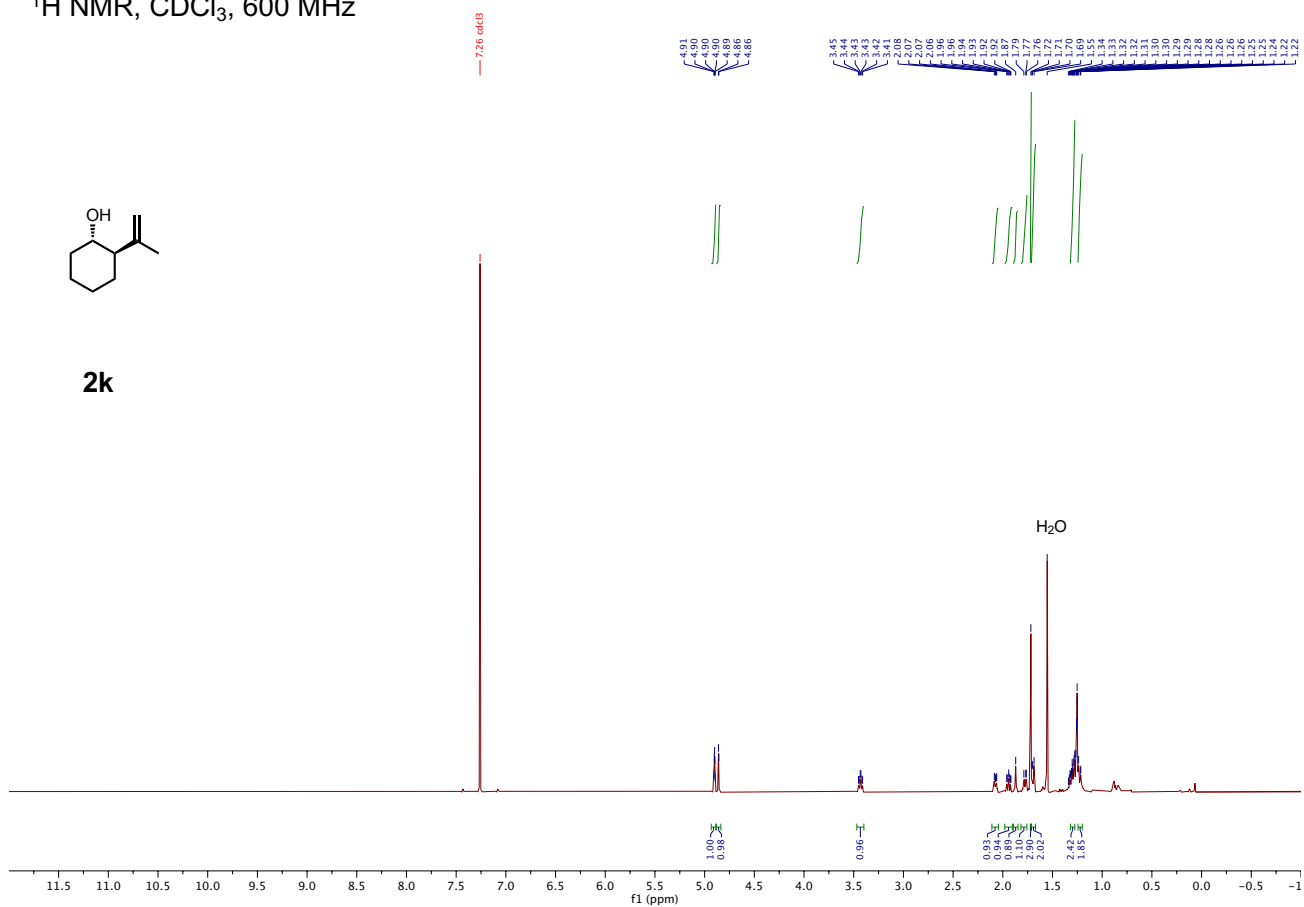

<sup>13</sup>C NMR, CDCl<sub>3</sub>, 101 MHz

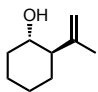

**2k**

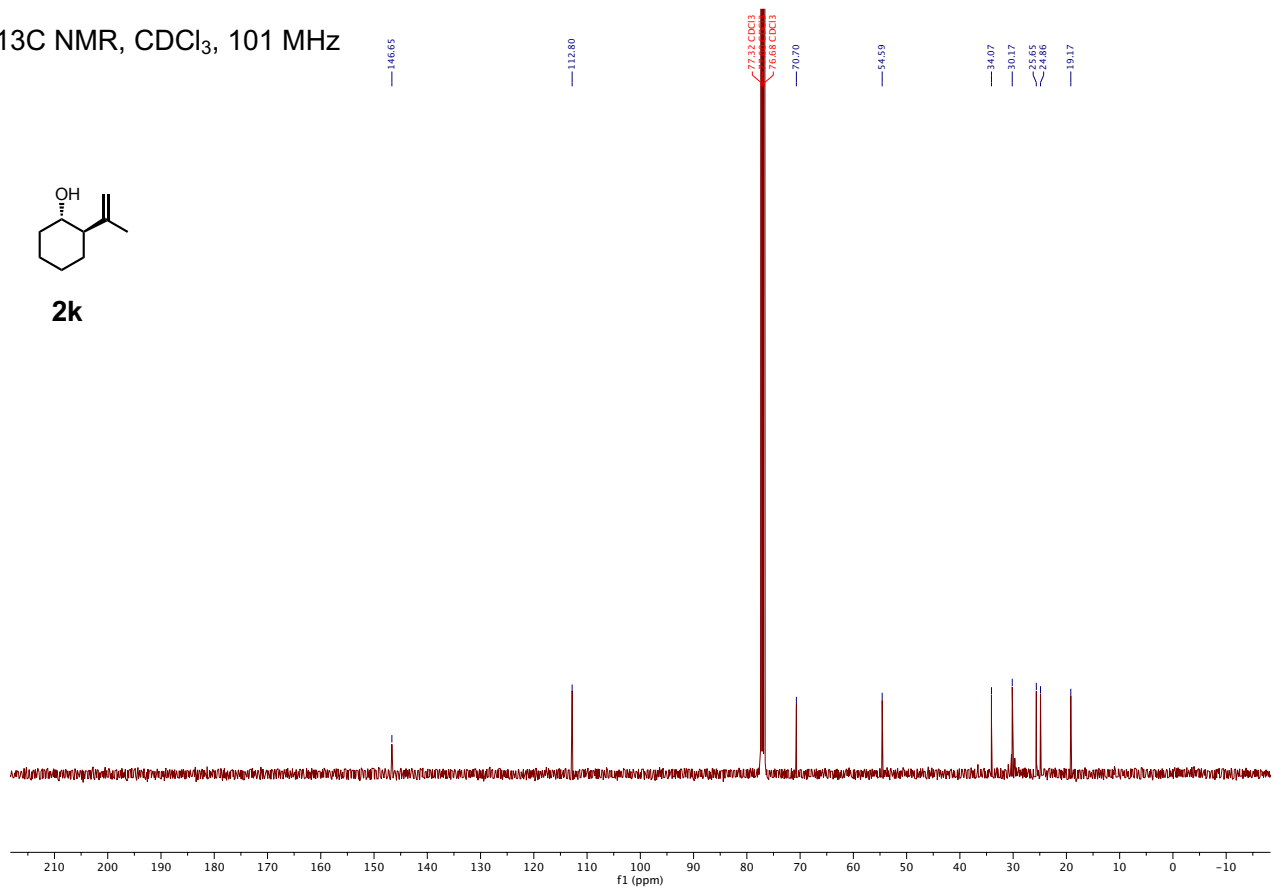

<sup>1</sup>H NMR, CDCl<sub>3</sub>, 400 MHz

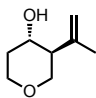

2l

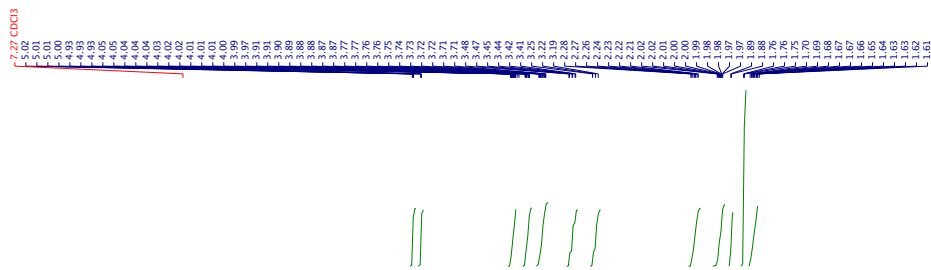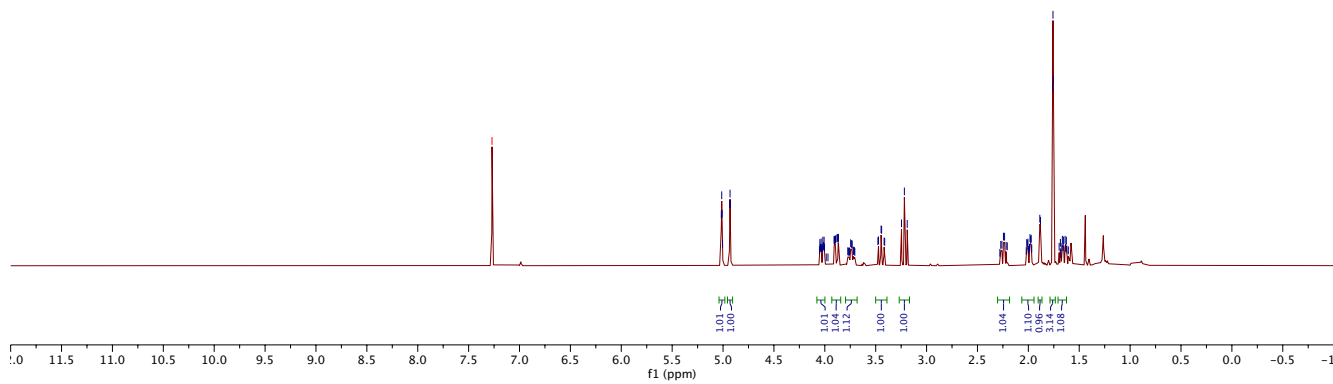

<sup>13</sup>C NMR, CDCl<sub>3</sub>, 101 MHz

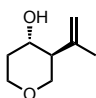

2l

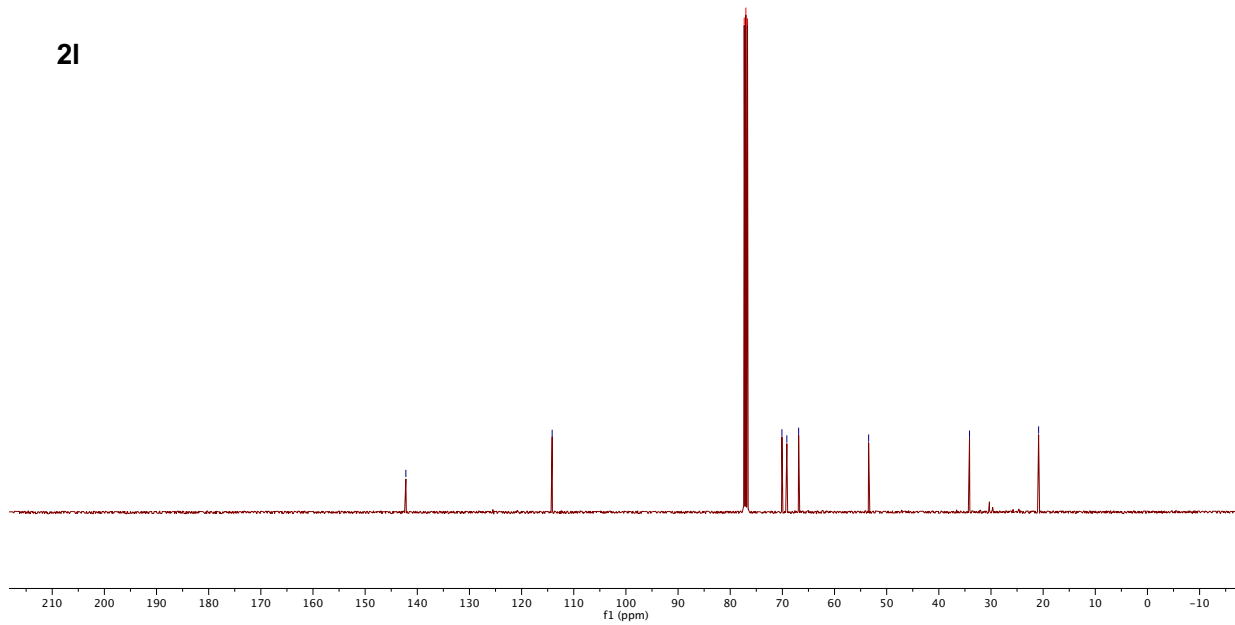

$^1\text{H}$  NMR,  $\text{CDCl}_3$ , 400 MHz

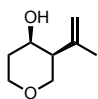

**2I-Cis**

(absolute configuration unknown)

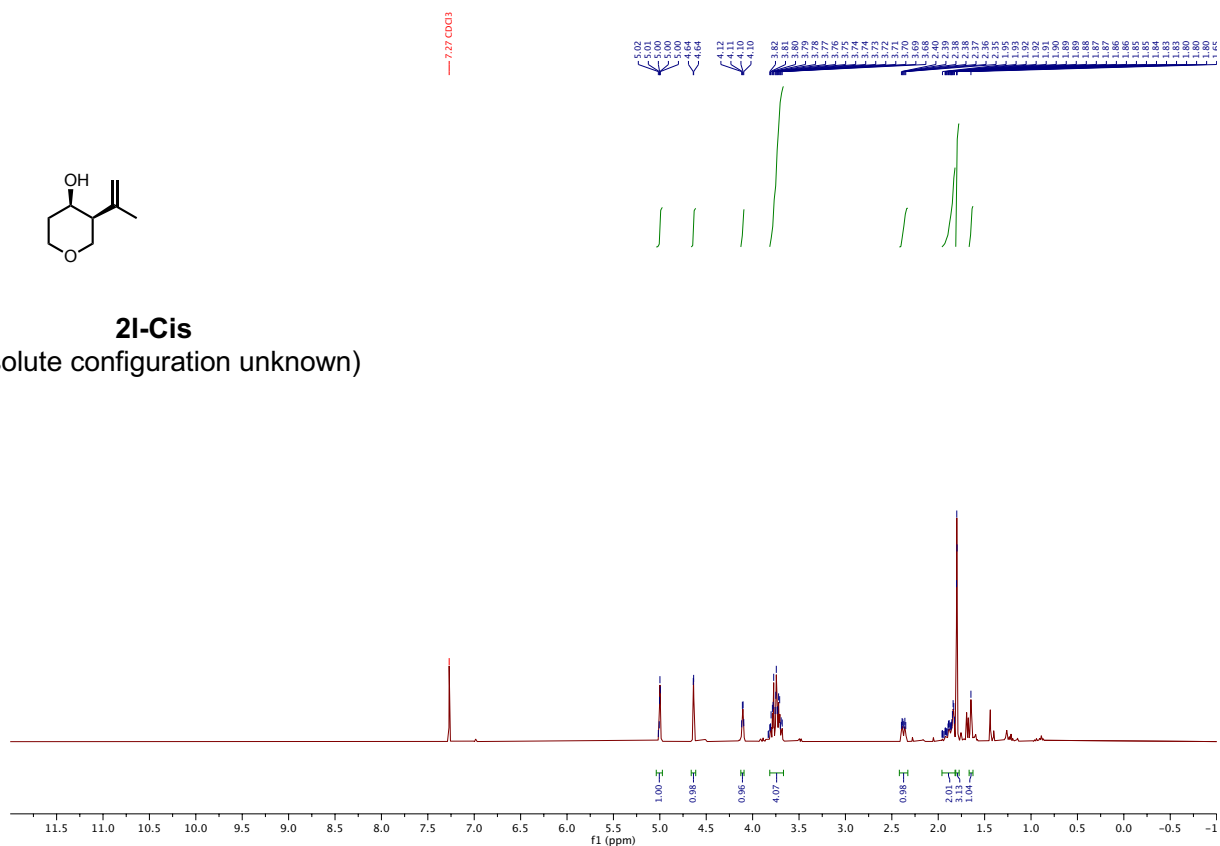

$^{13}\text{C}$  NMR,  $\text{CDCl}_3$ , 101 MHz

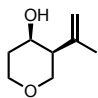

**2I-Cis**

(absolute configuration unknown)

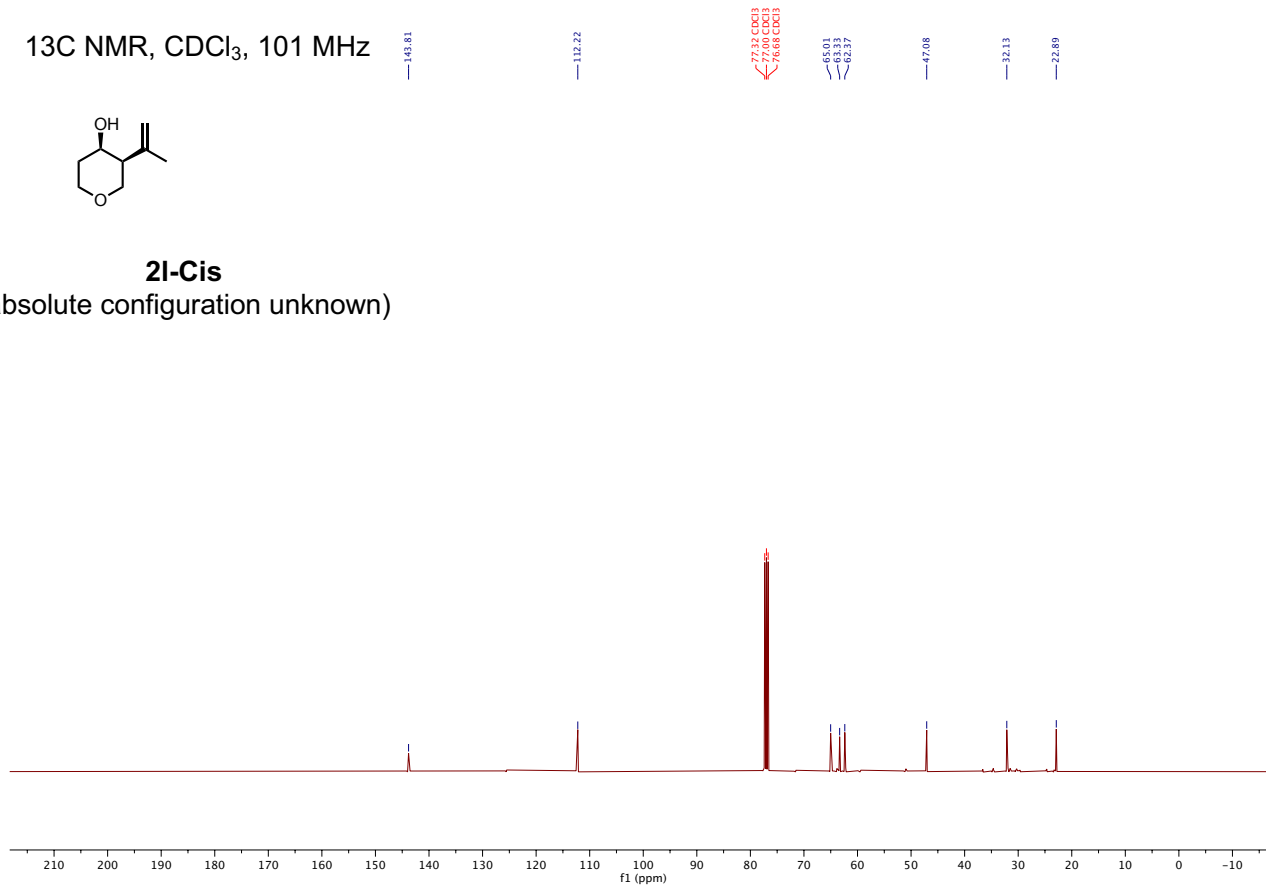

$^1\text{H}$  NMR,  $\text{CDCl}_3$ , 400 MHz

8:1 d.r. with *cis* diastereomer

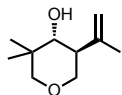

**2m**

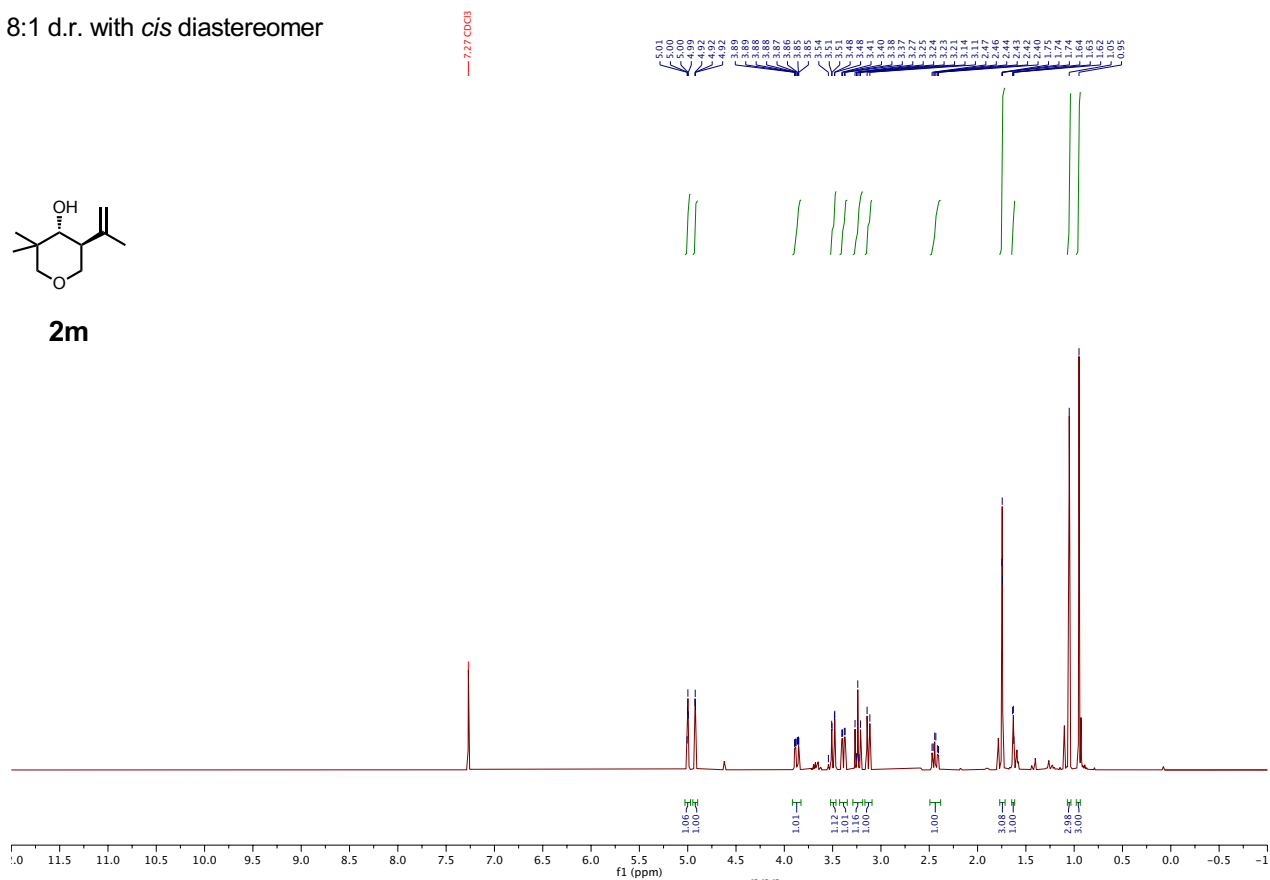

$^{13}\text{C}$  NMR,  $\text{CDCl}_3$ , 101 MHz

8:1 d.r. with *cis* diastereomer

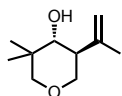

**2m**

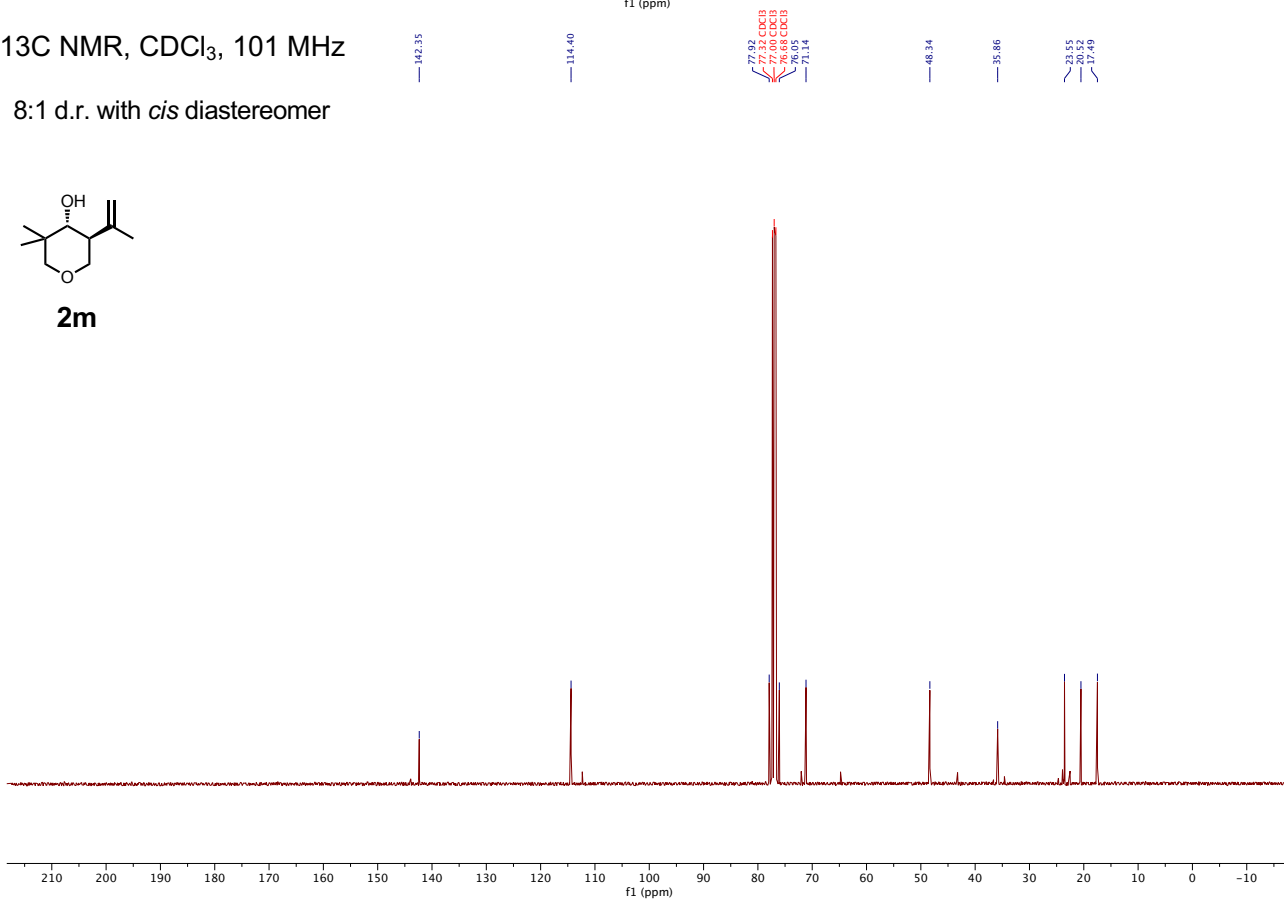

$^1\text{H}$  NMR,  $\text{CDCl}_3$ , 400 MHz

8:1 d.r. with *cis* diastereomer

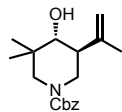

**2n**

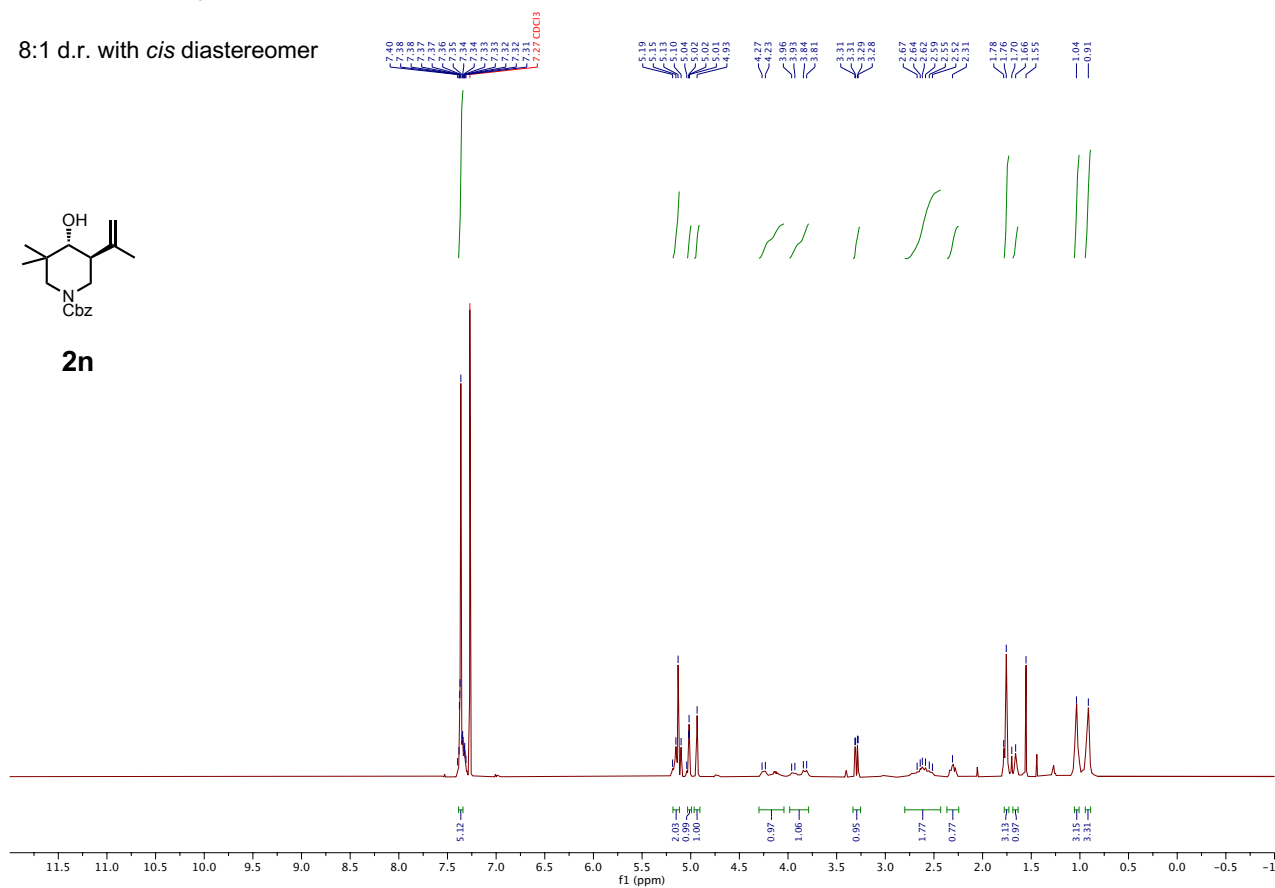

$^{13}\text{C}$  NMR,  $\text{CDCl}_3$ , 101 MHz

8:1 d.r. with *cis* diastereomer

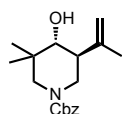

**2n**

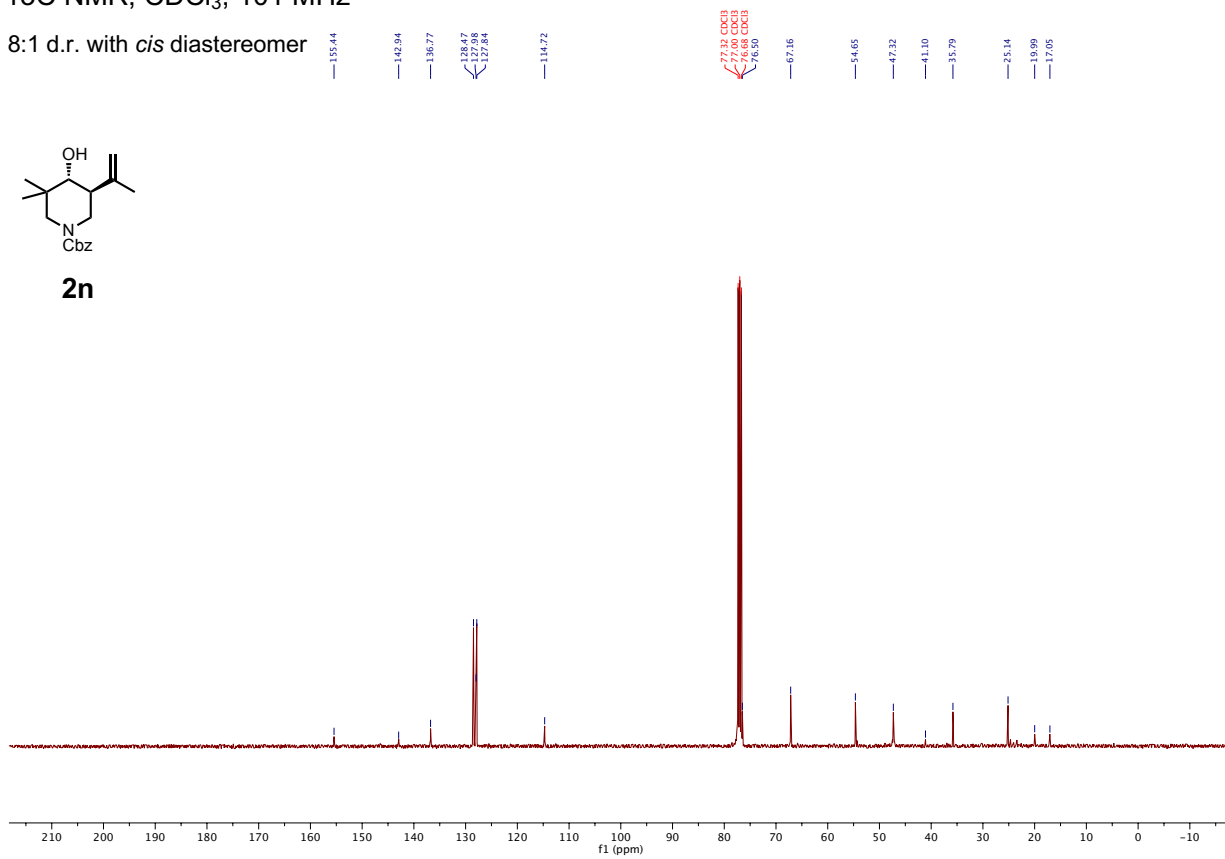

<sup>1</sup>H NMR, CDCl<sub>3</sub>, 400 MHz

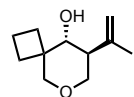

**2o**

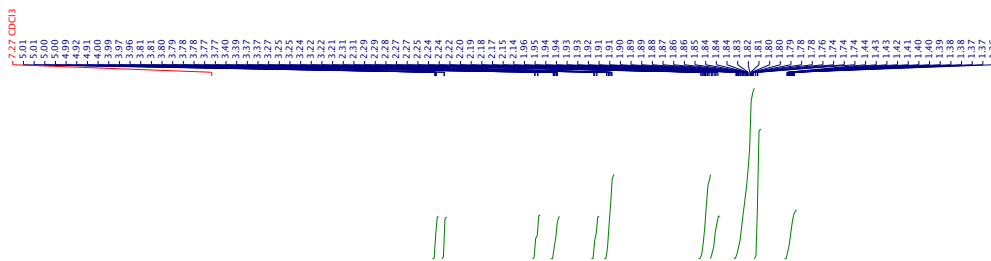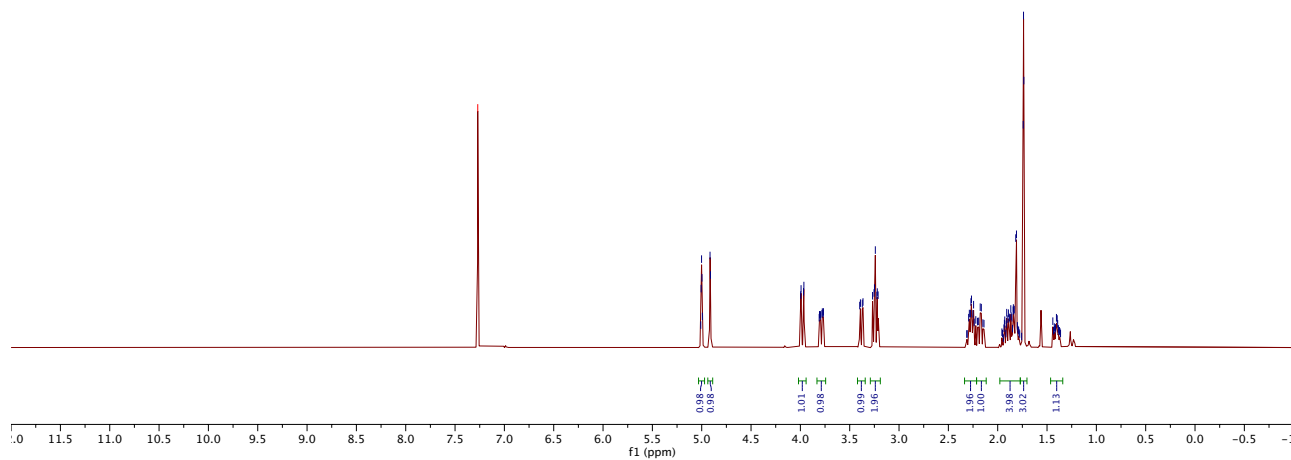

<sup>13</sup>C NMR, CDCl<sub>3</sub>, 101 MHz

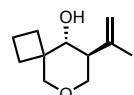

**2o**

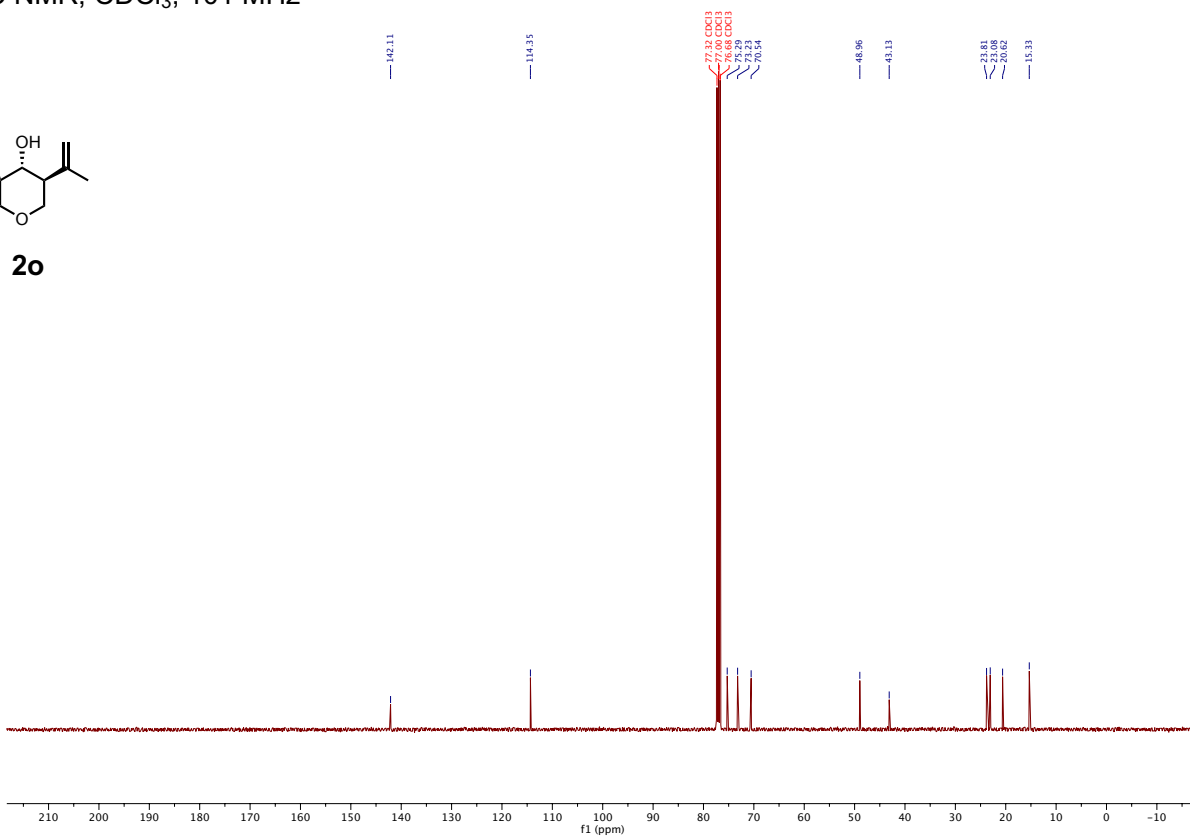



$^1\text{H}$  NMR,  $\text{CDCl}_3$ , 400 MHz

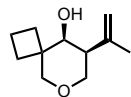

**2o-cis**

(absolute configuration unknown)

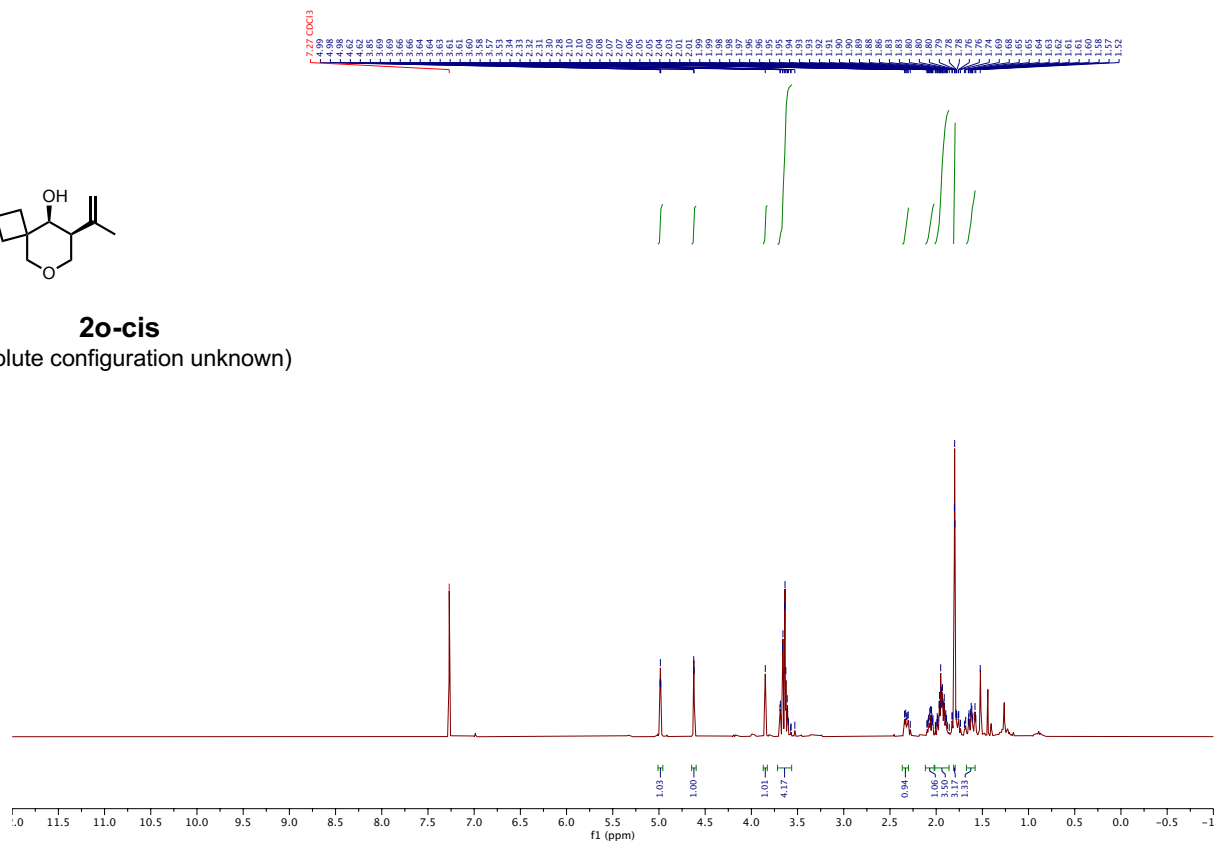

$^{13}\text{C}$  NMR,  $\text{CDCl}_3$ , 101 MHz

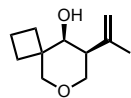

**2o-cis**

(absolute configuration unknown)

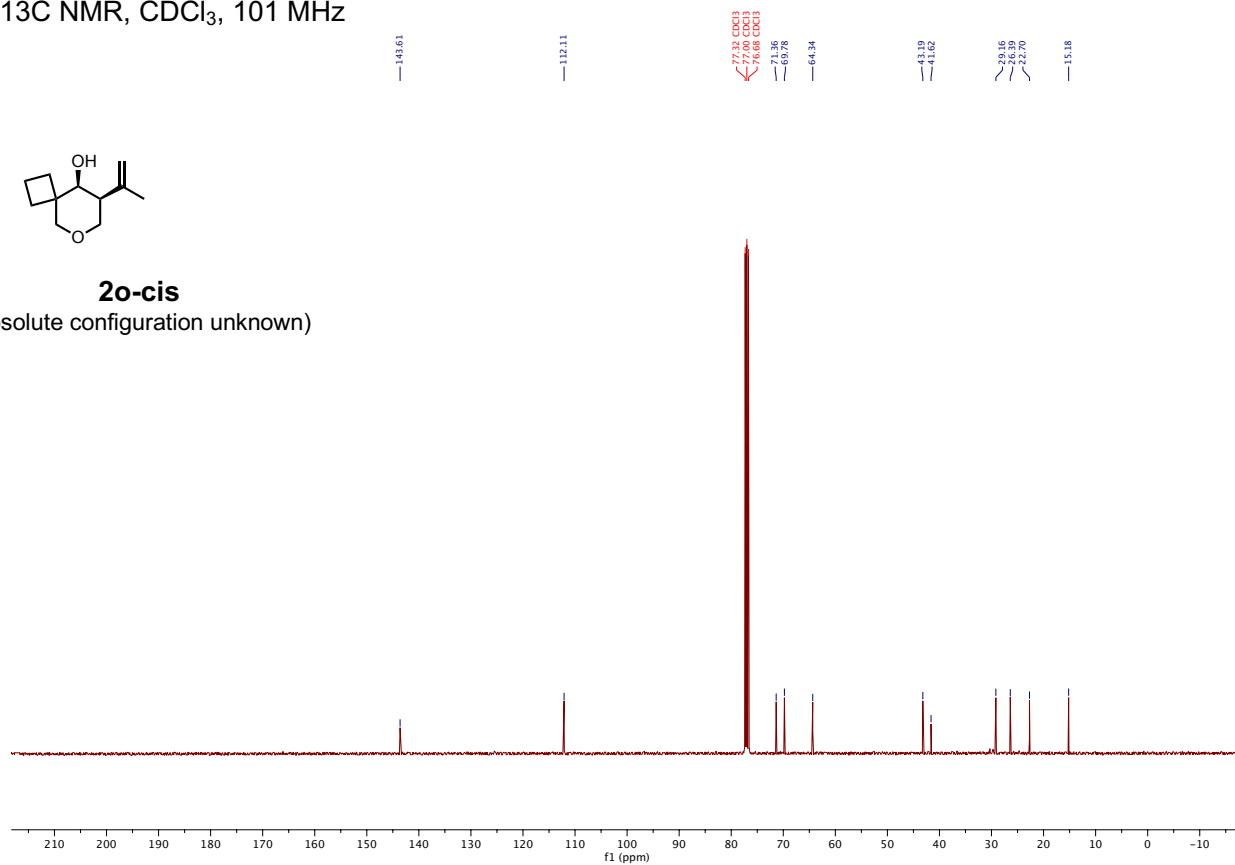

$^1\text{H}$  NMR,  $\text{CDCl}_3$ , 400 MHz

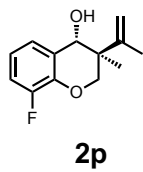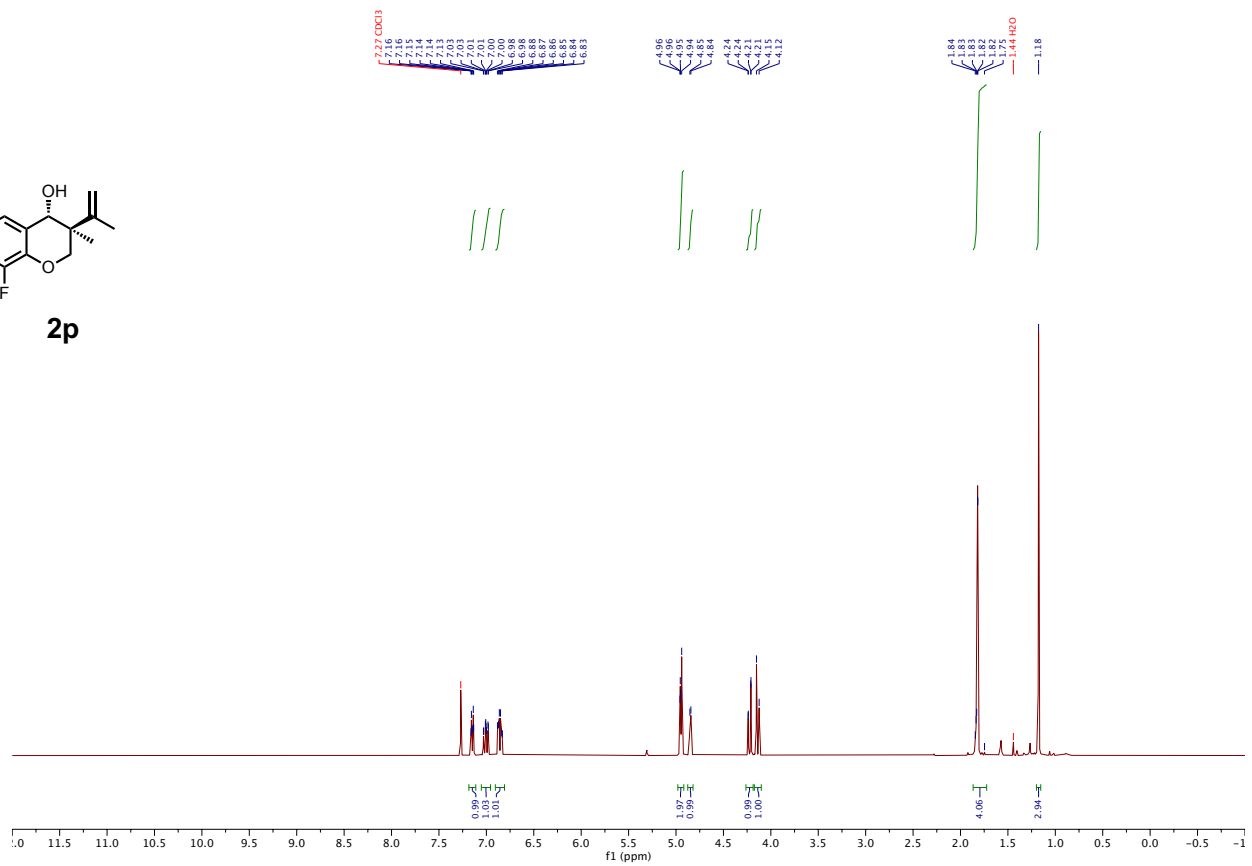

$^{13}\text{C}$  NMR,  $\text{CDCl}_3$ , 101 MHz

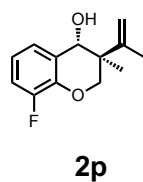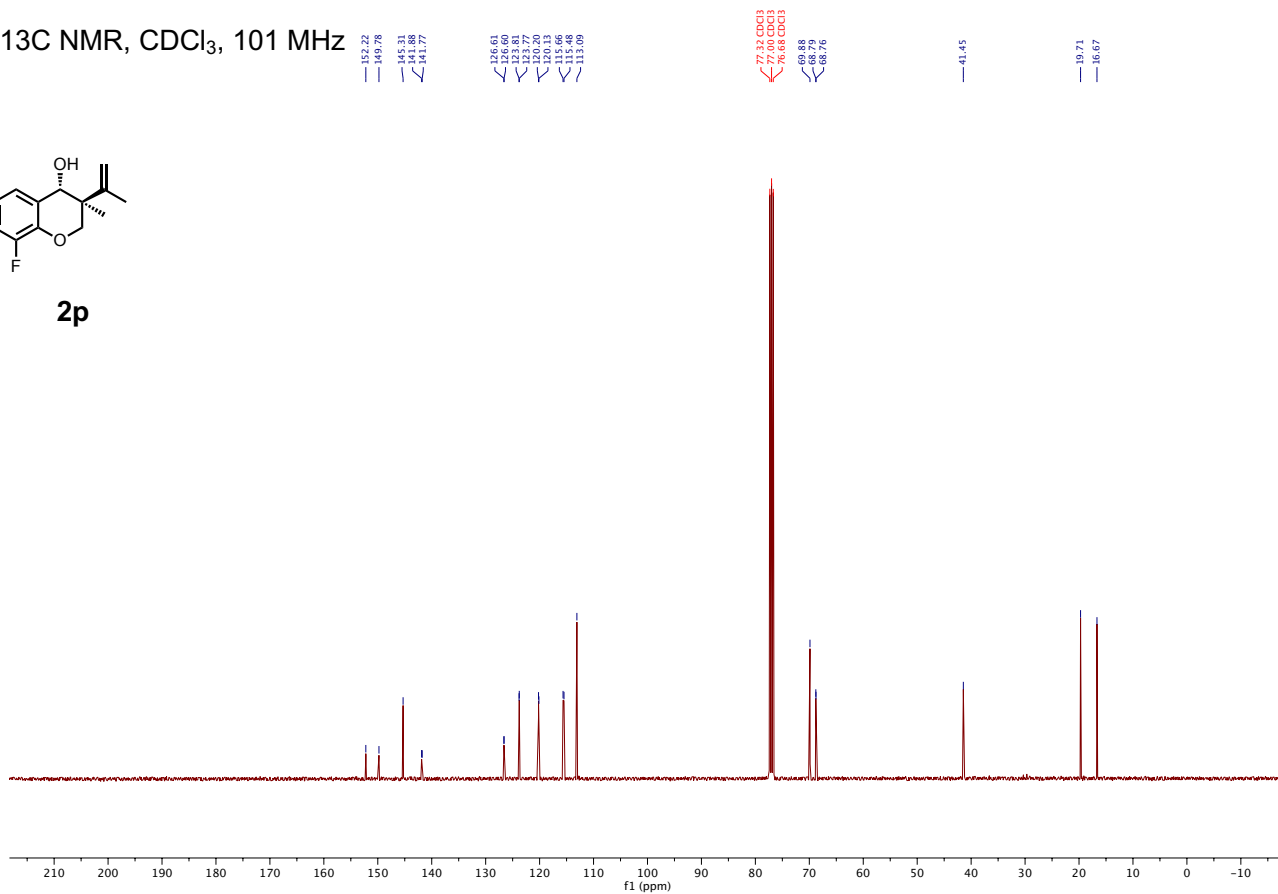

$^{19}\text{F}$  NMR,  $\text{CDCl}_3$ , 376 MHz

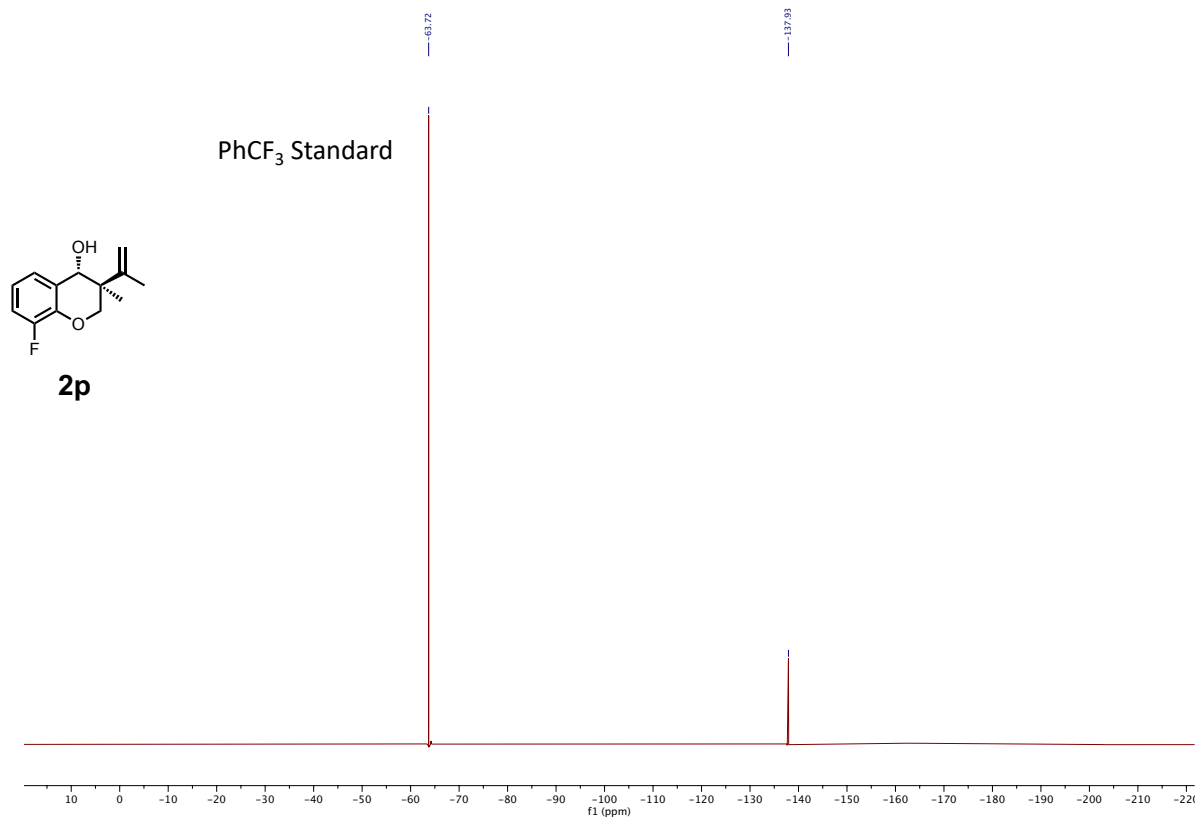

$^1\text{H}$  NMR,  $\text{CDCl}_3$ , 400 MHz

5:1 d.r. with *cis* diastereomer

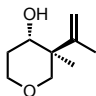

**2q**

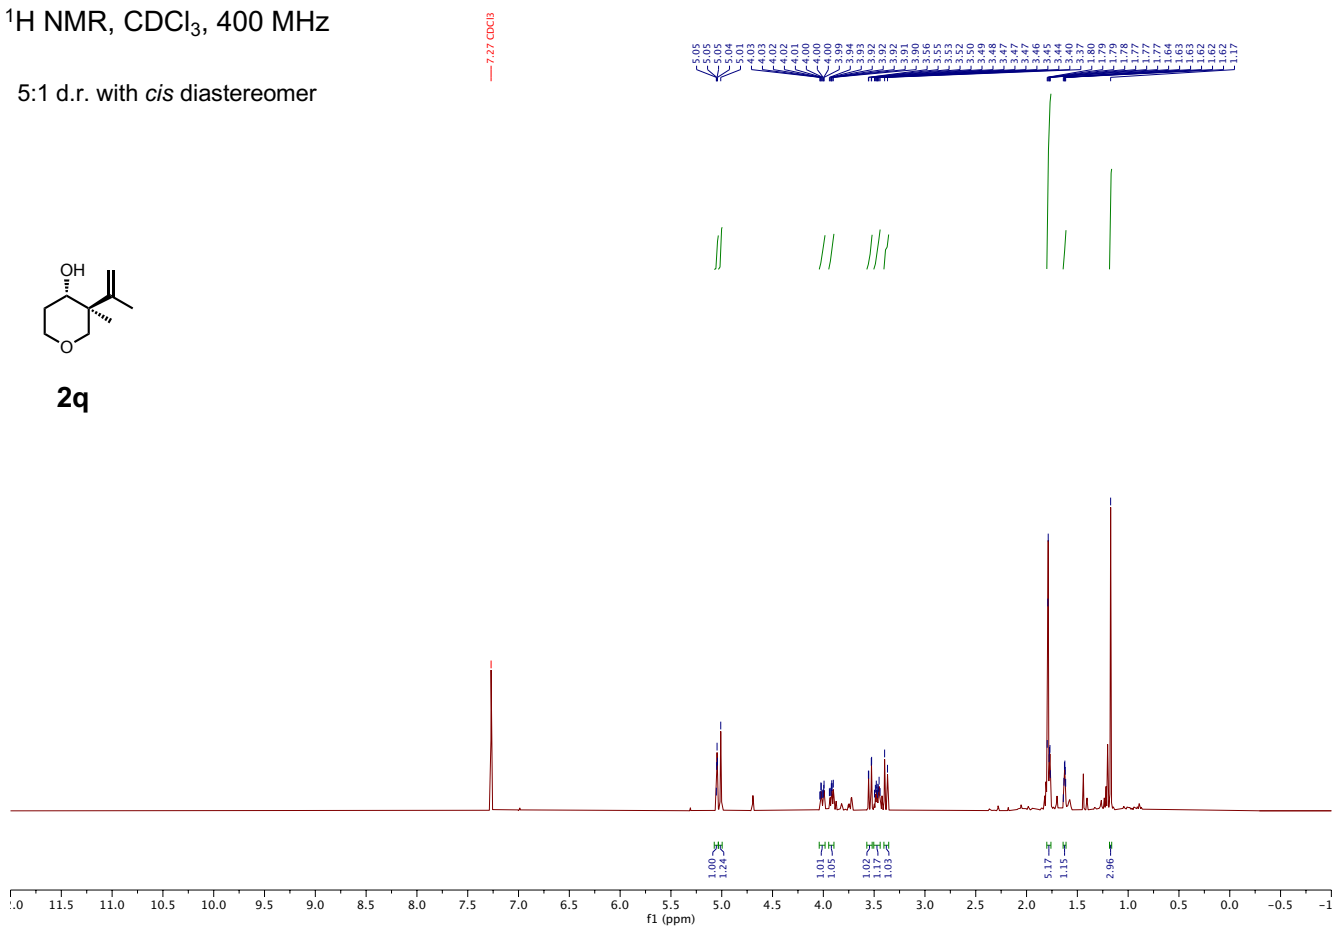

$^{13}\text{C}$  NMR,  $\text{CDCl}_3$ , 101 MHz

5:1 d.r. with *cis* diastereomer

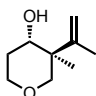

**2q**

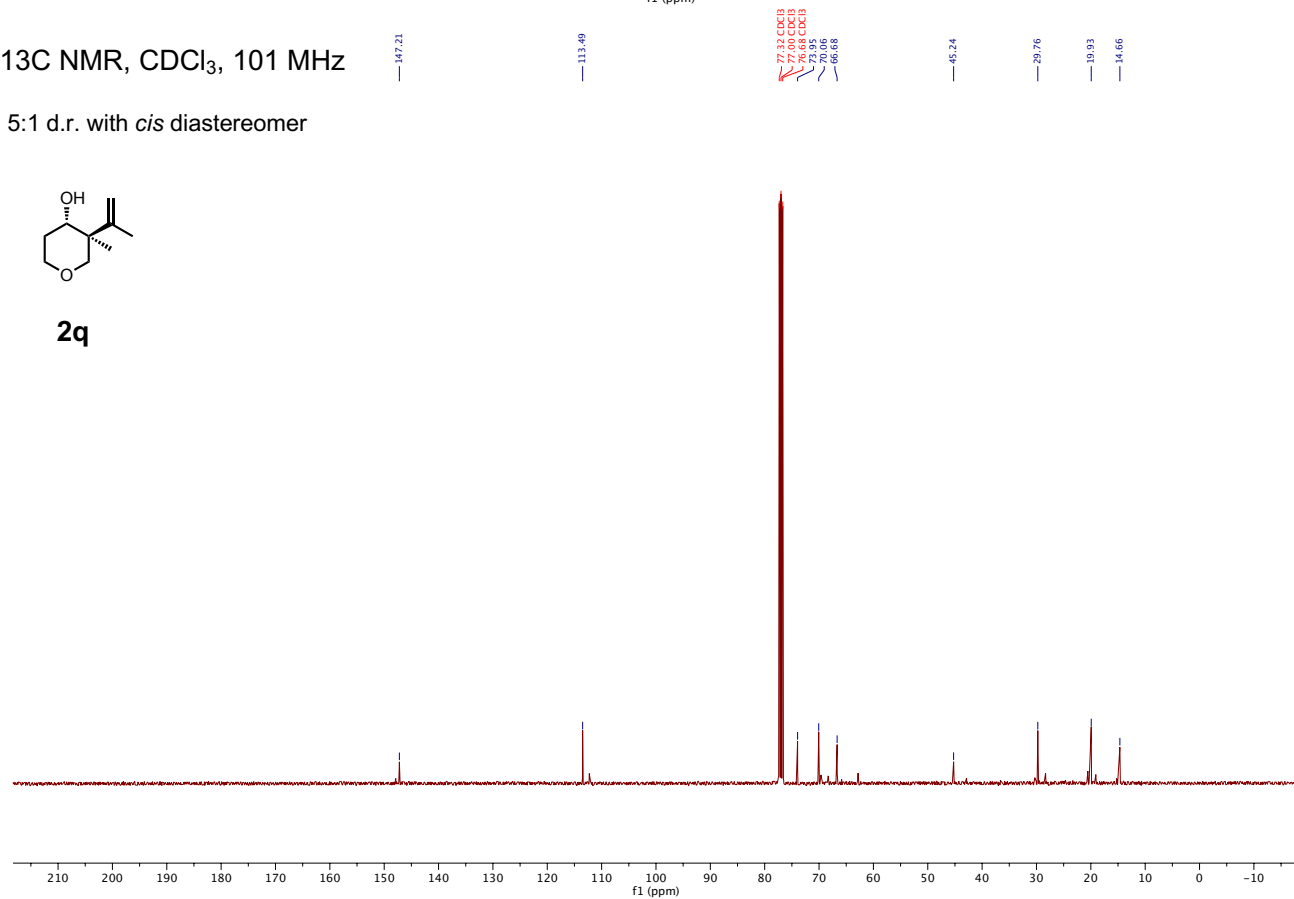

<sup>1</sup>H NMR, CDCl<sub>3</sub>, 400 MHz

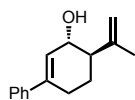

**2r**

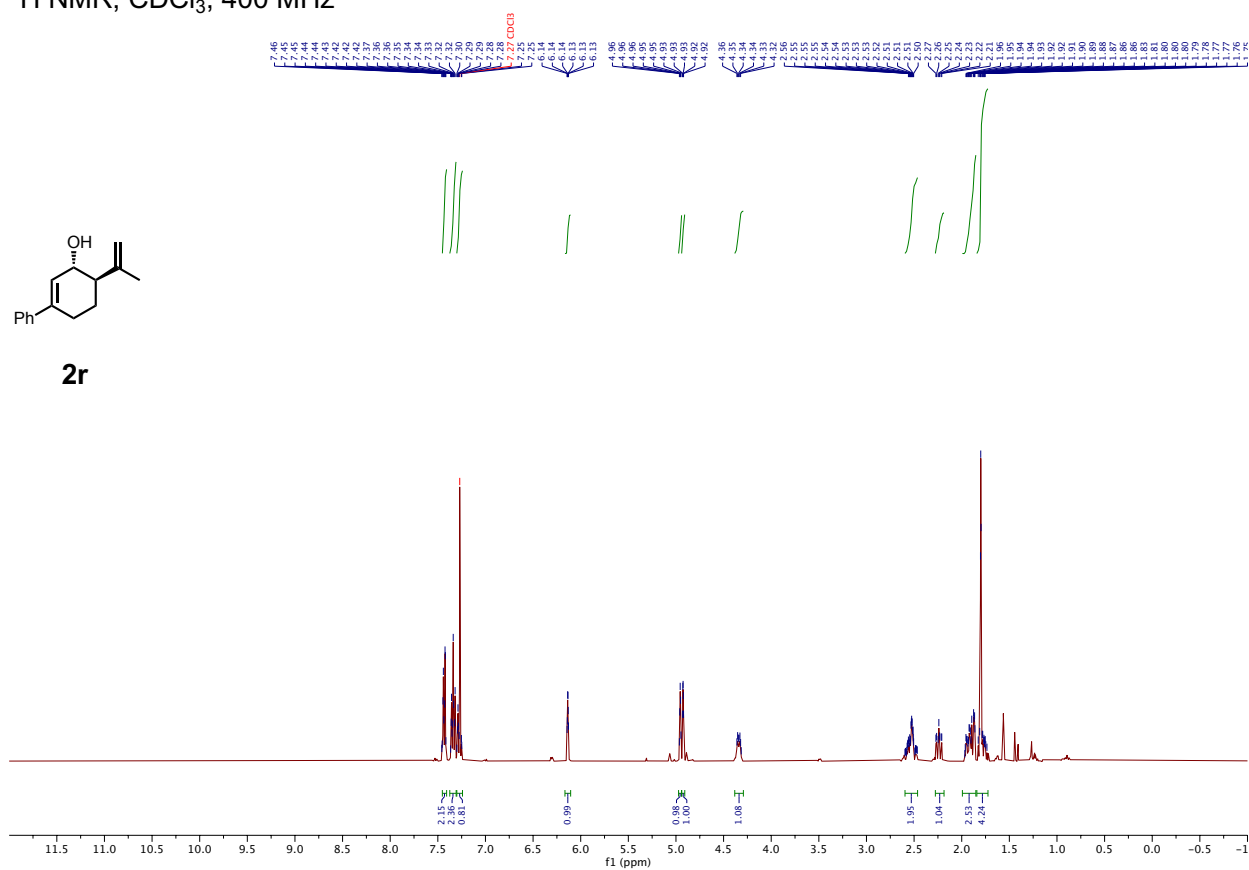

<sup>13</sup>C NMR, CDCl<sub>3</sub>, 101 MHz

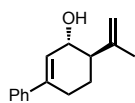

**2r**

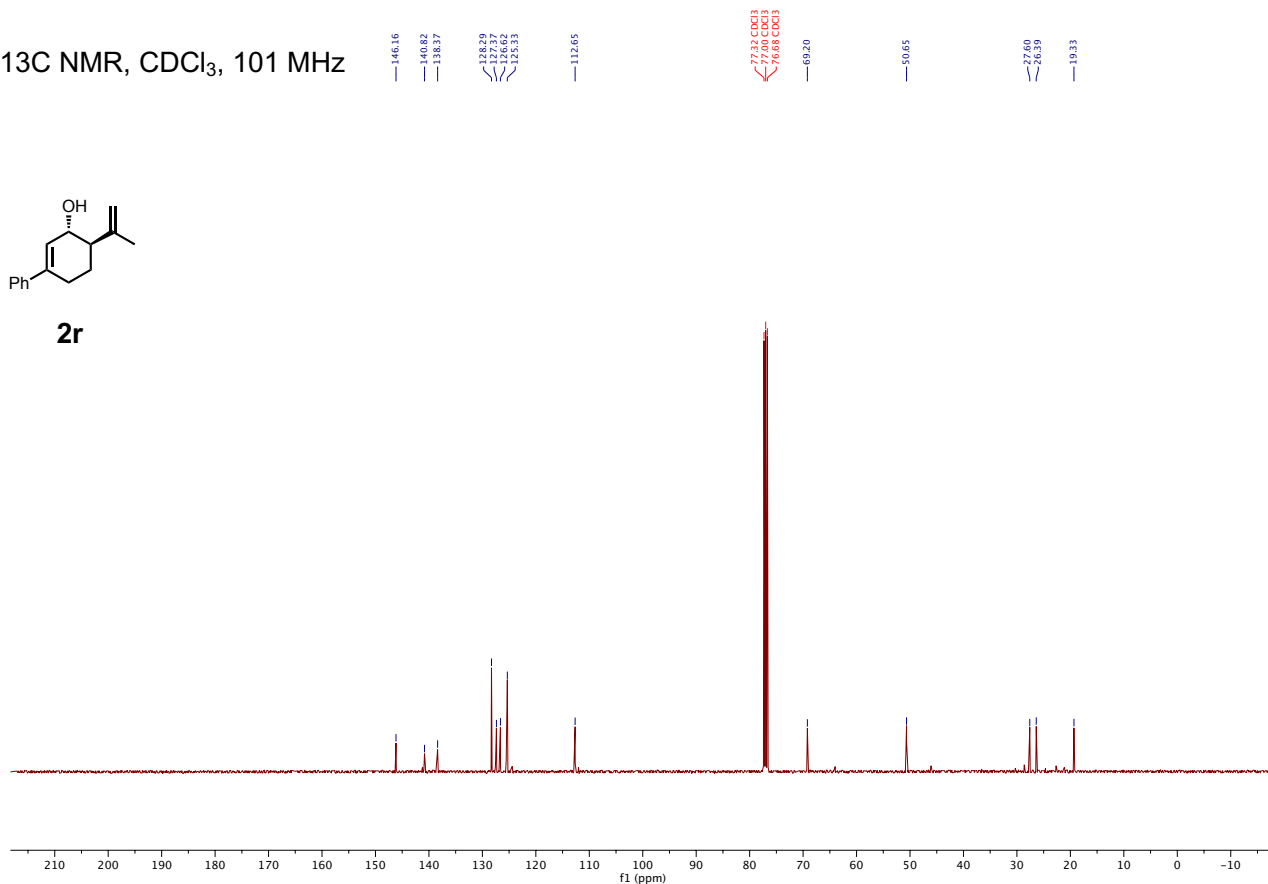

$^1\text{H}$  NMR,  $\text{CDCl}_3$ , 400 MHz

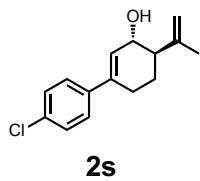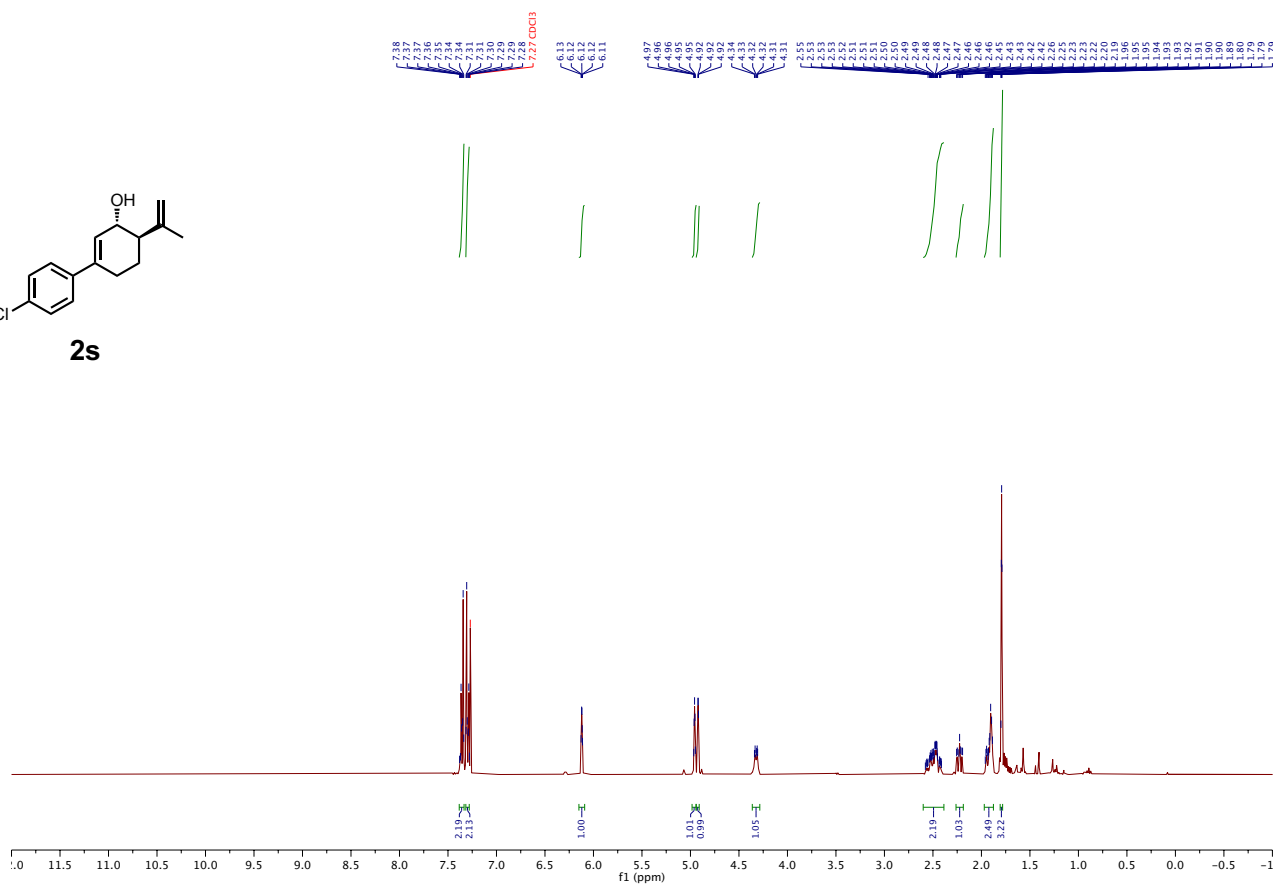

$^{13}\text{C}$  NMR,  $\text{CDCl}_3$ , 101 MHz

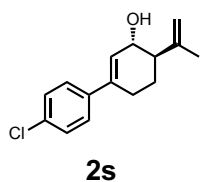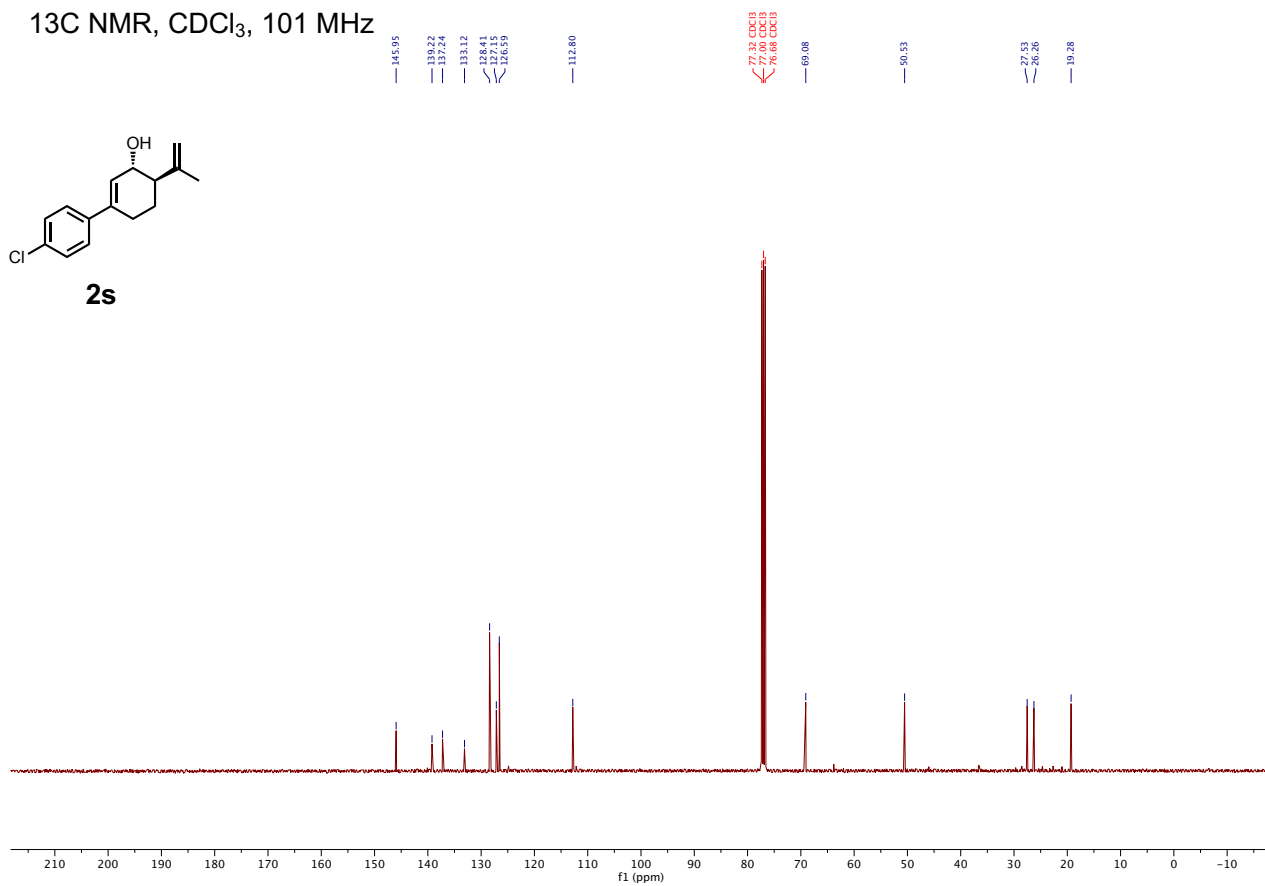

<sup>1</sup>H NMR, CDCl<sub>3</sub>, 400 MHz

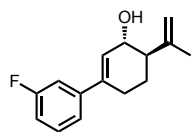

**2t**

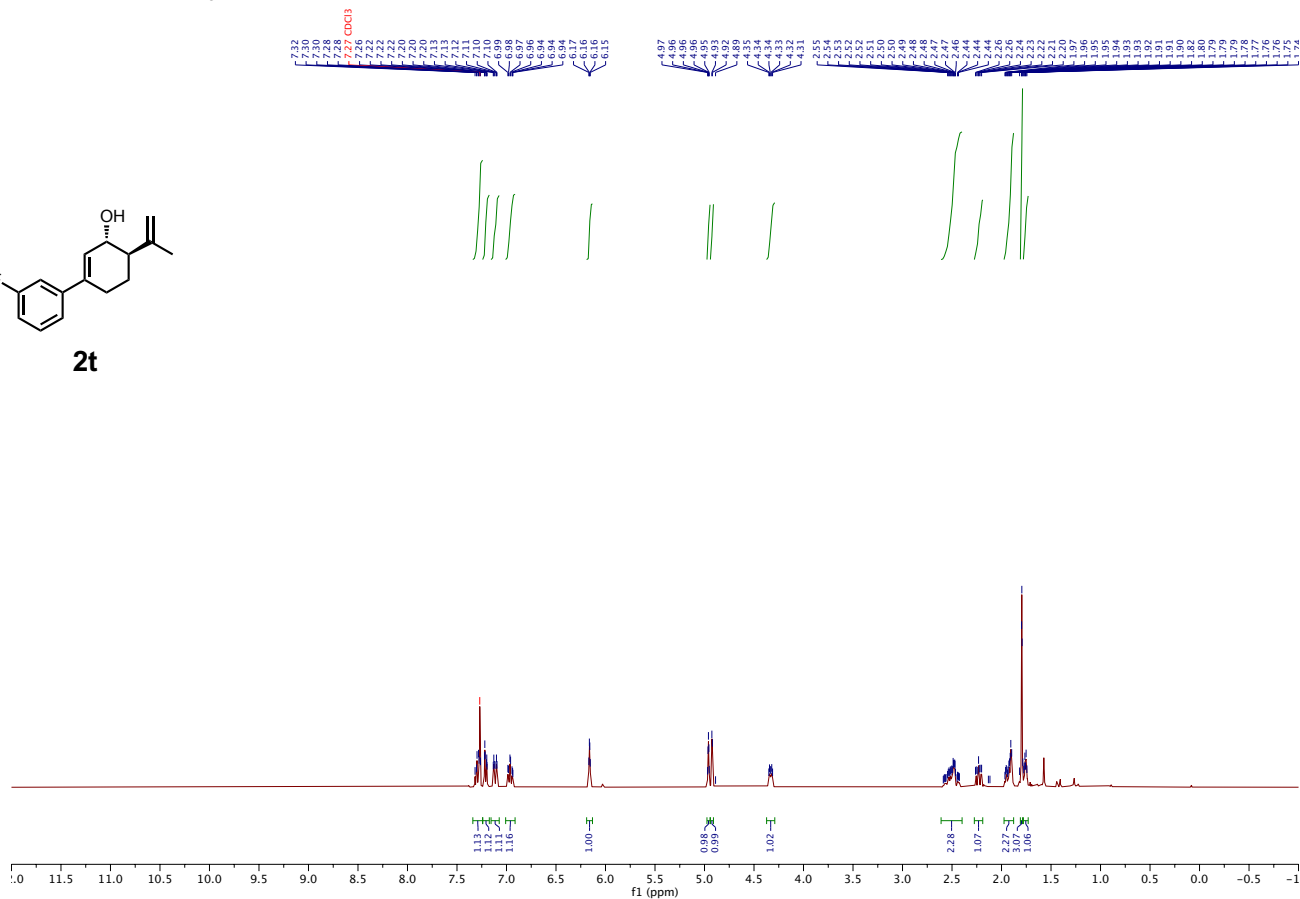

<sup>13</sup>C NMR, CDCl<sub>3</sub>, 101 MHz

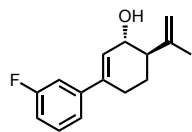

**2t**

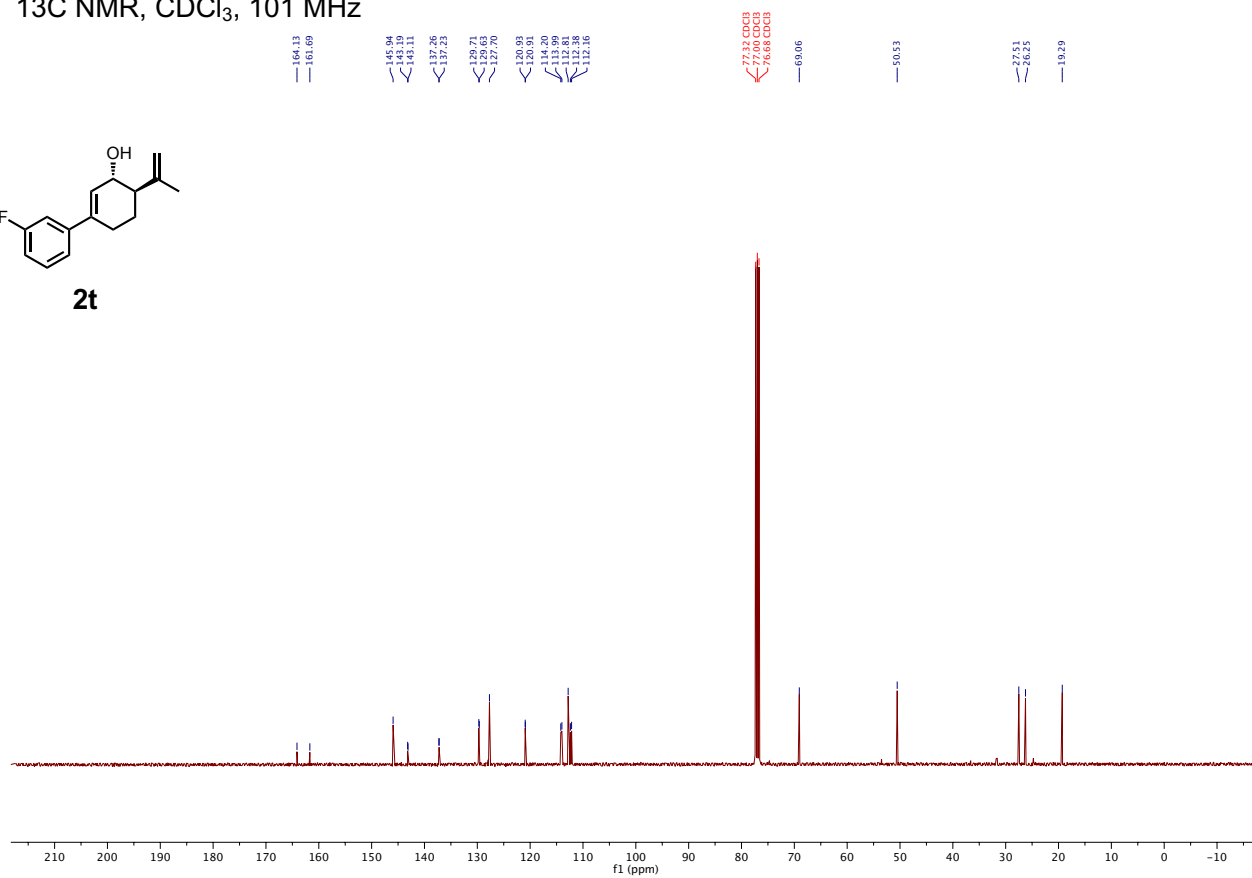

$^{19}\text{F}$  NMR,  $\text{CDCl}_3$ , 376 MHz

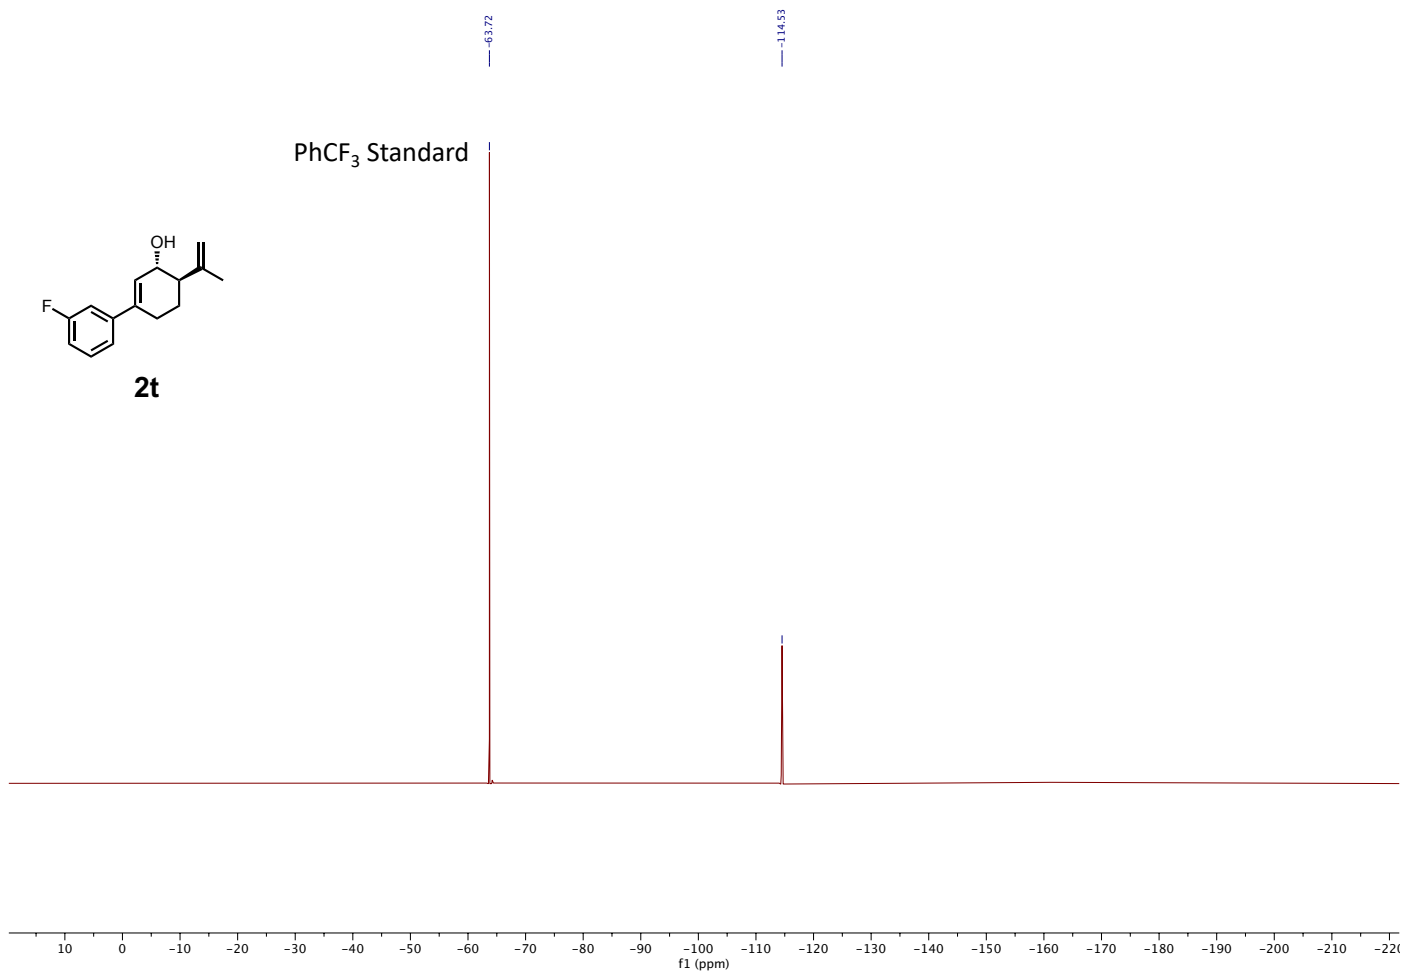



## 10. References

- [1] Kutateladze, D. A.; Strassfeld, D. A.; Jacobsen E. N. *J. Am. Chem. Soc.* **2020**, *142*, 6951.
- [2] Kennedy, C. R.; Choi, B. Y.; Reeves, M.; Jacobsen, E. N. *Isr. J. Chem.* **2020**, *60*, 461.
- [3] Zuend, S. J.; Jacobsen, E. N. *J. Am. Chem. Soc.* **2009**, *131*, 15358.
- [4] Kou, X.; Shao, Q.; Ye, C.; Yang, G.; Zhang, W. *J. Am. Chem. Soc.* **2018**, *140*, 7587.
- [5] Korthals, K. A.; Wulff, W. D. *J. Am. Chem. Soc.* **2008**, *130*, 2898.
